# Supplementary material for: Ubiquitin ligase STUB1 destabilizes IFNγ-receptor complex to suppress tumor IFNγ signaling
Source: Springer Nature journal article supplement (doi:10.1038/s41467-022-29442-x), 2022-04-08
Supplement: MOESM1 [file 41467_2022_29442_MOESM1_ESM.pdf]

# Supplementary Figure 1

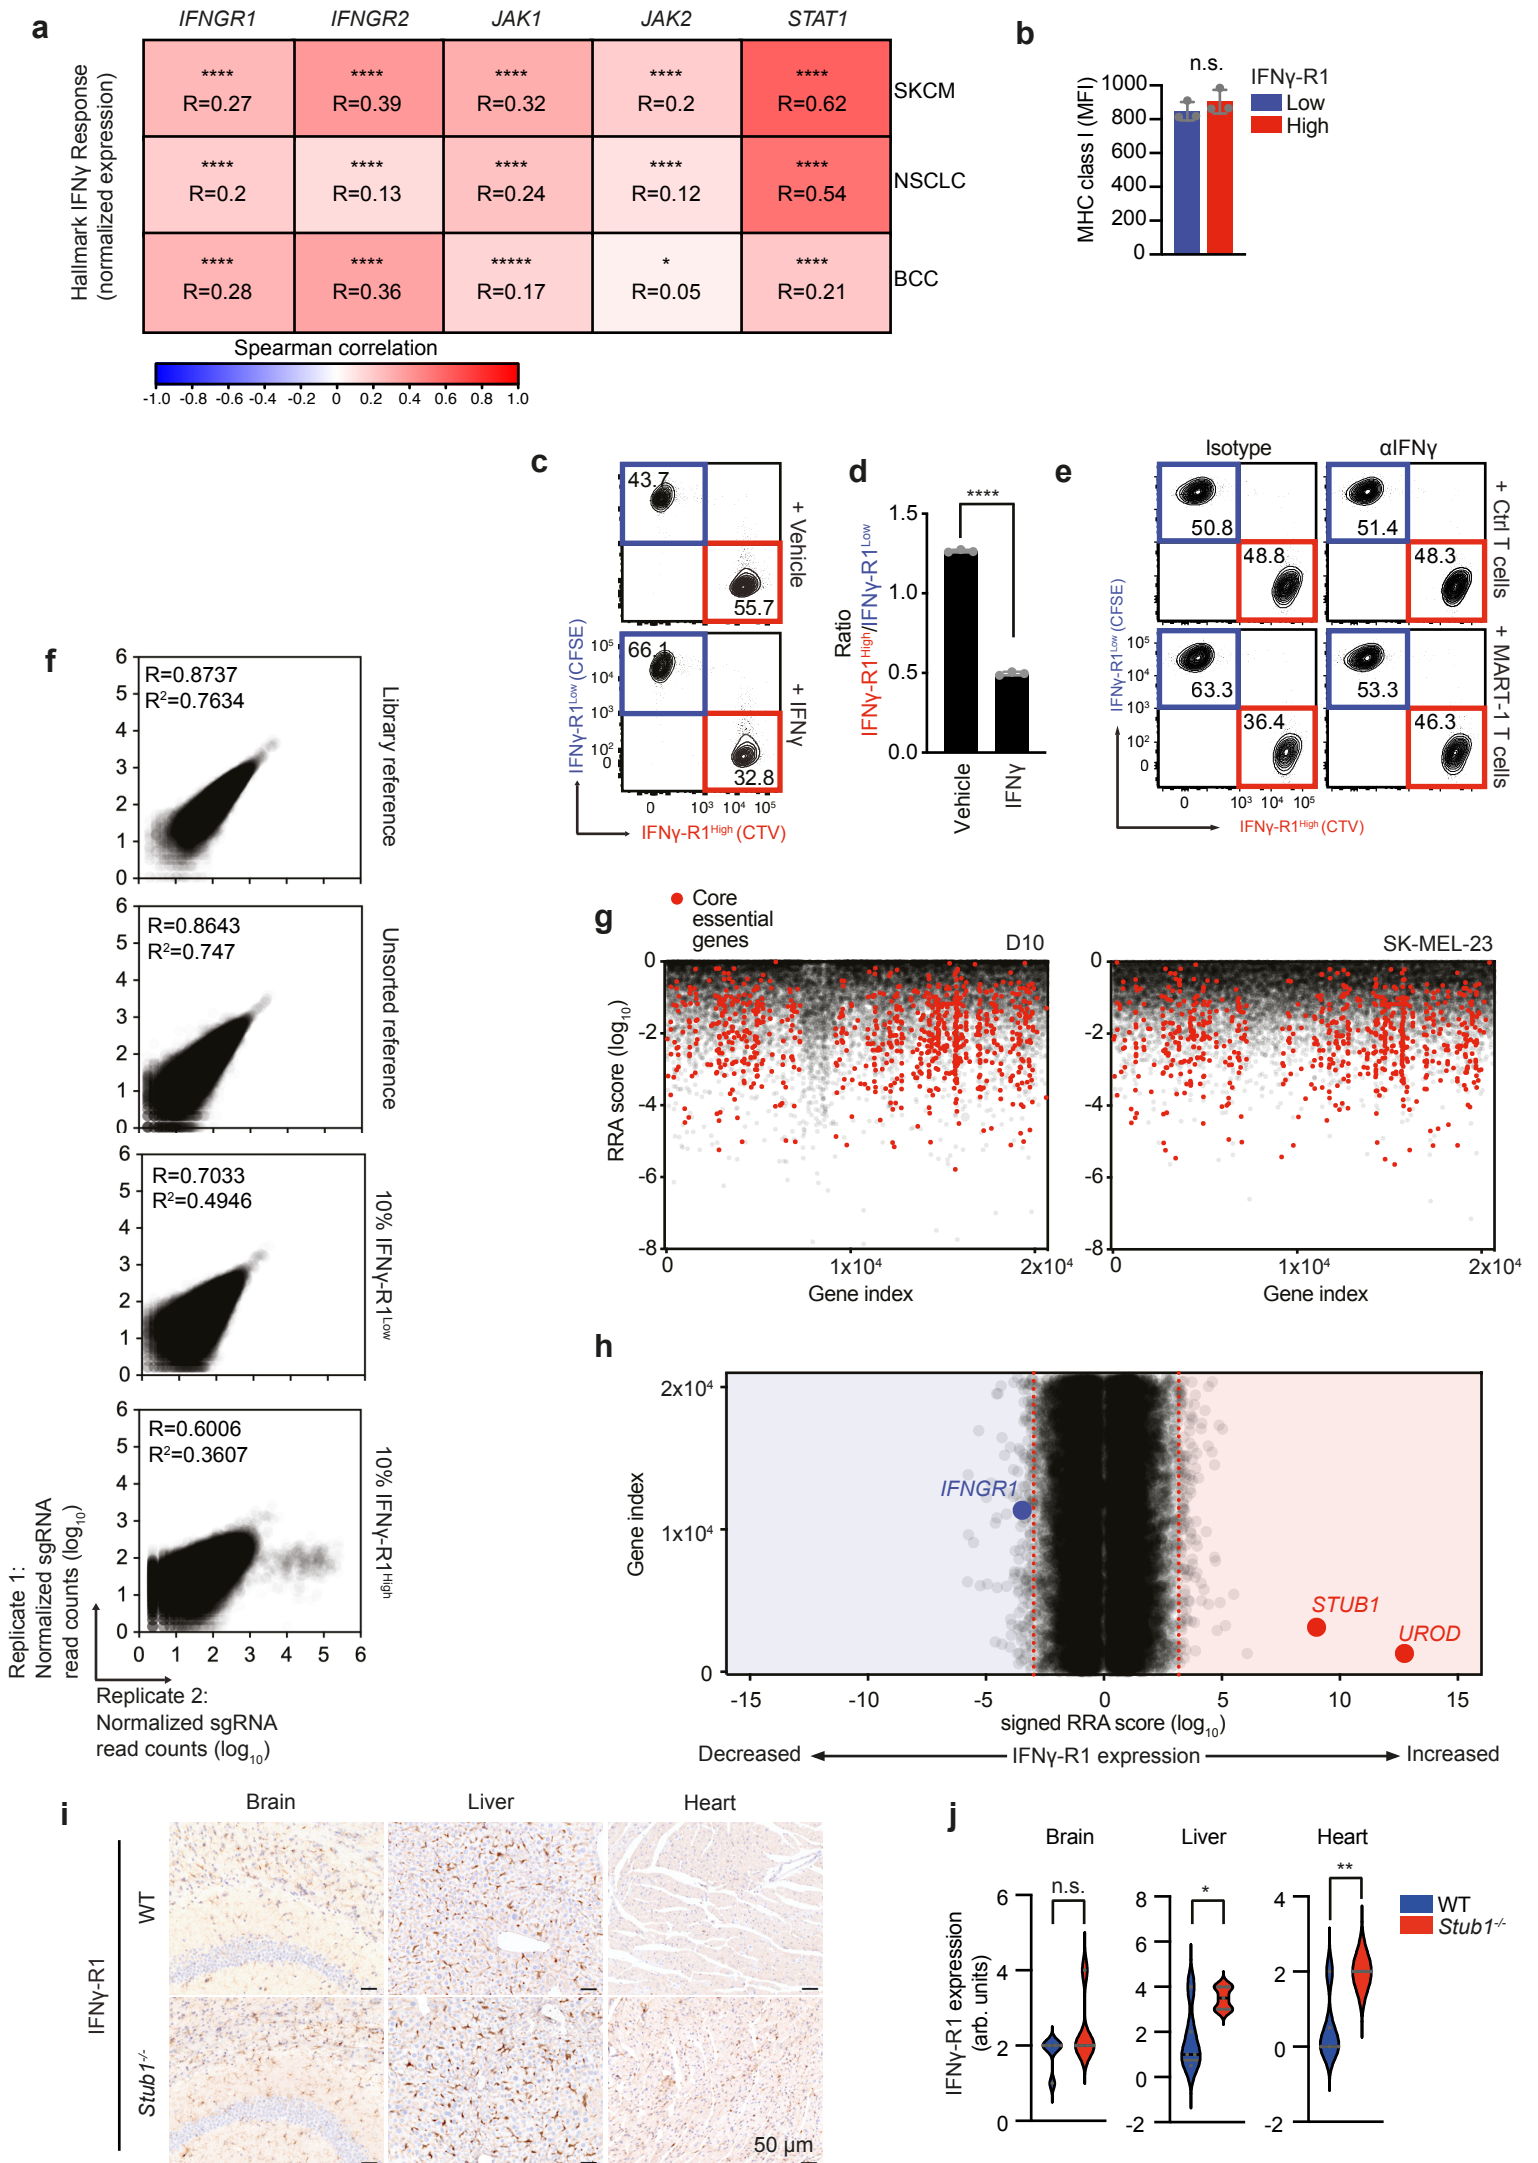

## Supplementary Figure Legends

### Supplementary Figure 1: Genome-wide CRISPR/Cas9 knockout screen identifies negative regulators of IFN $\gamma$ -R1 expression to modulate its cell surface abundance.

**a**, Spearman correlation matrix of *IFNGR1*, *IFNGR2*, *JAK1*, *JAK2* and *STAT1* expression with Hallmark IFN $\gamma$  response signature in scRNA sequencing data<sup>37-39</sup>. IFN $\gamma$ -R complex genes present in the Hallmark IFN $\gamma$  response gene set were removed from the Hallmark IFN $\gamma$  response gene set prior calculating the correlation. Numbers indicate Spearman correlation.

**b**, Quantification of MHC class I expression on IFN $\gamma$ -R1<sup>High</sup> and IFN $\gamma$ -R1<sup>Low</sup>-sorted D10 melanoma cells by flow cytometry from **Figure 1d**.

**c**, Flow cytometry plot of *in vitro* competition assay of IFN $\gamma$ -R1<sup>High</sup> vs. IFN $\gamma$ -R1<sup>Low</sup> cells treated with either vehicle or 25 ng/ml IFN $\gamma$  for five days. Number in quadrants indicates % of parent population.

**d**, Quantification of the ratio IFN $\gamma$ -R1<sup>High</sup> : IFN $\gamma$ -R1<sup>Low</sup> in competition assay of **(c)**.

**e**, Flow cytometry plot of the *in vitro* competition assay of IFN $\gamma$ -R1<sup>High</sup> vs. IFN $\gamma$ -R1<sup>Low</sup> cells co-cultured with either MART-1 or Ctrl T cells. Number in quadrants indicates % of parent population.

**f**, Spearman correlation plots of log<sub>10</sub>-transformed normalized read counts of sgRNAs in genome-wide CRISPR-KO screen in D10 melanoma cell line between replicates.

**g**, Log<sub>10</sub>-transformed RRA scores of depleted genes comparing library reference sample to unsorted bulk population in D10 (left) and SK-MEL-23 cells (right). Highlighted in red: core essential genes. y-axis: RRA score, x-axis: gene index.

**h**, Results of screen outlined in **(Figure 1g)** for SK-MEL-23 cells. x-axis: signed log<sub>10</sub>-transformed signed MAGeCK robust rank aggregation (RRA) score for each gene; y-axis: gene index. Red dotted lines indicate FDR cutoff <0.25 for genes enriched in 10% of cells with the highest (right) or lowest (left) IFN $\gamma$ -R1 expression.

**i**, Representative immunohistochemistry images of IFN $\gamma$ -R1 expression in either wildtype (WT) or *Stub1*-deficient murine brain, liver and heart tissue.

**j**, Quantification of IFN $\gamma$ -R1 expression in either WT or *Stub1*-deficient murine brain, liver and heart tissues from **i**.

Mean $\pm$ SD in **(b)**, unpaired t-test for three biological replicates.

Mean $\pm$ SD in **(d)**, \*\*\*\*p<0.0001, unpaired t-test for three biological replicates.

Violin plot in (j), \*\* $p=0.0047$ , \* $p=0.0265$  unpaired t-tests for five biological replicates.

# Supplementary Figure 2

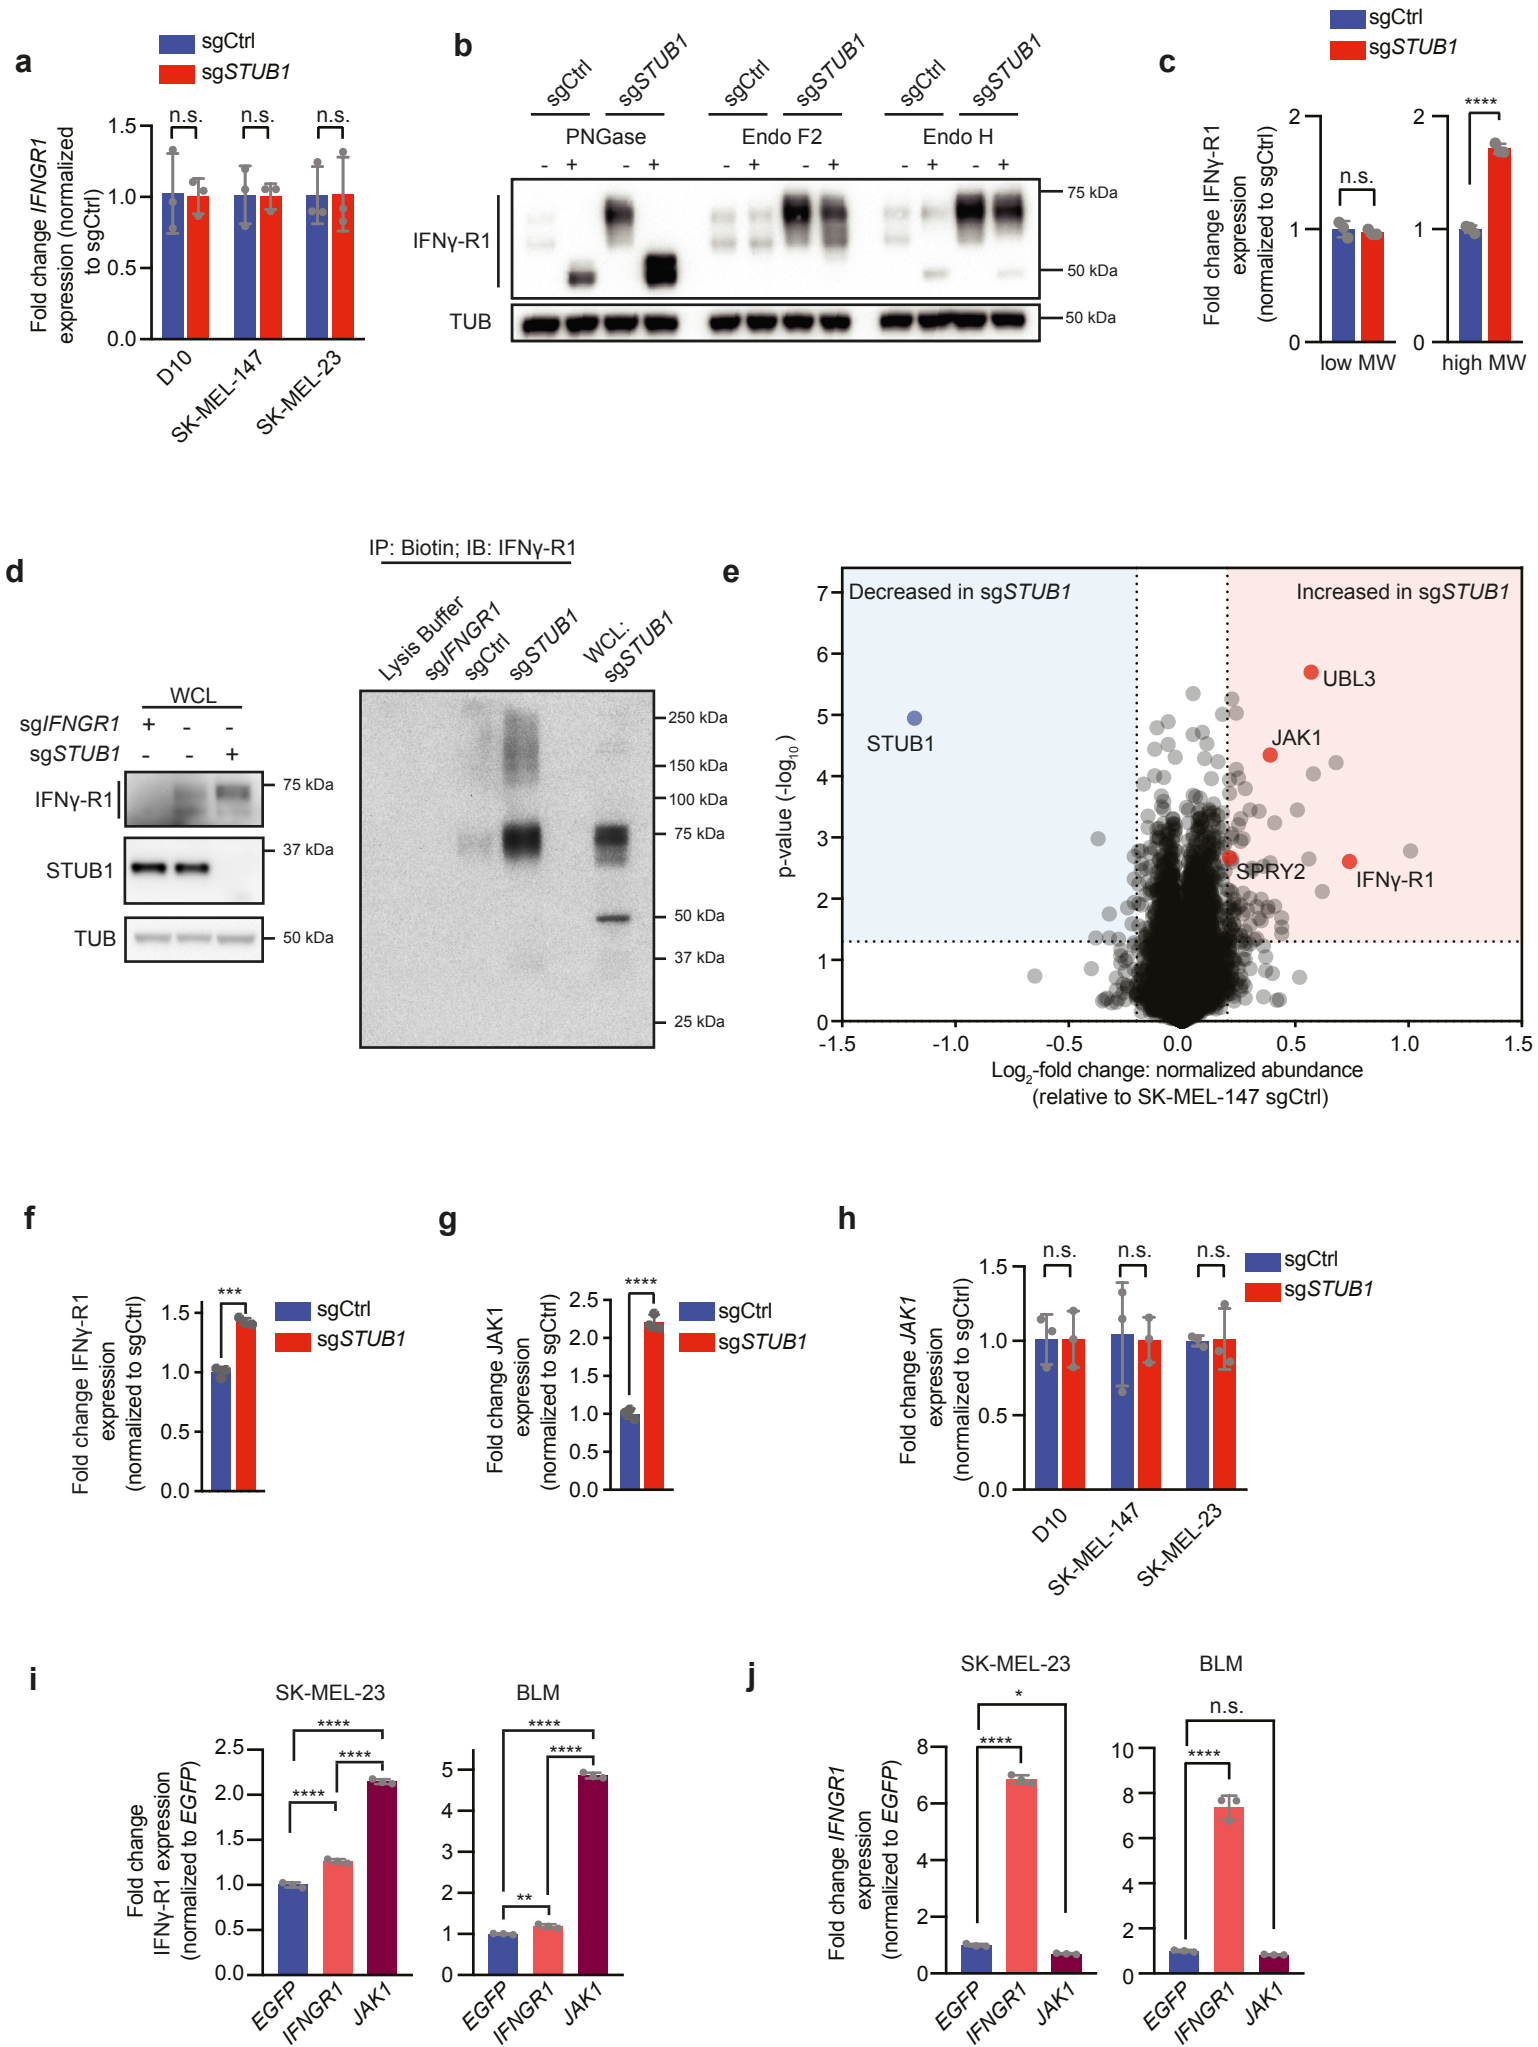

**Supplementary Figure 2: STUB1 destabilizes cell surface IFN $\gamma$ -R1 in JAK1-dependent and JAK1-independent manners.**

**a**, qPCR analysis for *IFNGR1* expression in D10, SK-MEL-147 and SK-MEL-23 cells expressing sgCtrl or sgSTUB1. *IFNGR1* expression was normalized to sgCtrl-expressing cells using  $\Delta\Delta$ CT method.

**b**, Immunoblot of whole cell lysates (WCL) treated with indicated deglycosylating enzymes. WCL were collected from D10 cells expressing sgCtrl or sgSTUB1 and immunoblotted for IFN $\gamma$ -R1 and Tubulin. Representative of three biological replicates.

**c**, Densitometric quantification of low and high molecular weight IFN $\gamma$ -R1 protein levels (relative to loading control) in D10 cells from immunoblot in **(Figure 2b)**.

**d**, Immunoblot of WCL and immuno-precipitated cell surface proteins using biotin labelling in D10 clone deficient in *IFNGR1*, or D10 cell pool expressing sgCtrl or sgSTUB1. Immunoprecipitated biotin-labelled proteins were immunoblotted for IFN $\gamma$ -R1. Right-most lane in the right panel represents 10% of WCL of sgSTUB1-expressing cells. Representative of three biological replicates.

**e**, Results of proteomic profiling of SK-MEL-147 cells expressing sgCtrl or sgSTUB1. Highlighted proteins are differentially regulated in two cell lines **(Figure 2a)**.

**f**, Densitometric quantification of IFN $\gamma$ -R1 protein levels (relative to loading control) in D10 cells from immunoblot in **(Figure 2b)**.

**g**, same as in **(f)** but for JAK1 protein.

**h**, qPCR analysis for *JAK1* expression in D10, SK-MEL-147 and SK-MEL-23 cells expressing sgCtrl or sgSTUB1. *IFNGR1* expression was normalized to sgCtrl-expressing cells using  $\Delta\Delta$ CT method.

**i**, Flow cytometric quantification of IFN $\gamma$ -R1 expression in SK-MEL-23 and BLM-M cells expressing indicated constructs.

**j**, qPCR analysis for *IFNGR1* expression in SK-MEL-23 and BLM-M cells expressing indicated constructs. *IFNGR1* expression was normalized to *EGFP*-expressing cells using  $\Delta\Delta$ CT method.

Mean $\pm$ SD in **(a)**, unpaired t-tests were performed for each cell line, each three biological replicates.

Mean $\pm$ SD in **(c)**, \*\*\*\*p<0.0001, unpaired t-test for three biological replicates.

Mean $\pm$ SD in **(f, g)**, unpaired t-test for three biological replicates. \*\*\*p=0.0002 **(f)**, \*\*\*\*p<0.0001 **(g)**.

Mean $\pm$ SD in (h), multiple t-test for three biological replicates.

Mean $\pm$ SD in (i), \*\*p=0.0093, \*\*\*\*p<0.0001, ordinary one-way ANOVA for three biological replicates with Tukey post hoc testing.

Mean $\pm$ SD in (j), \*p=0.0103, \*\*\*\*p<0.0001, ordinary one-way ANOVA for three biological replicates with Dunnett post hoc testing.

# Supplementary Figure 3

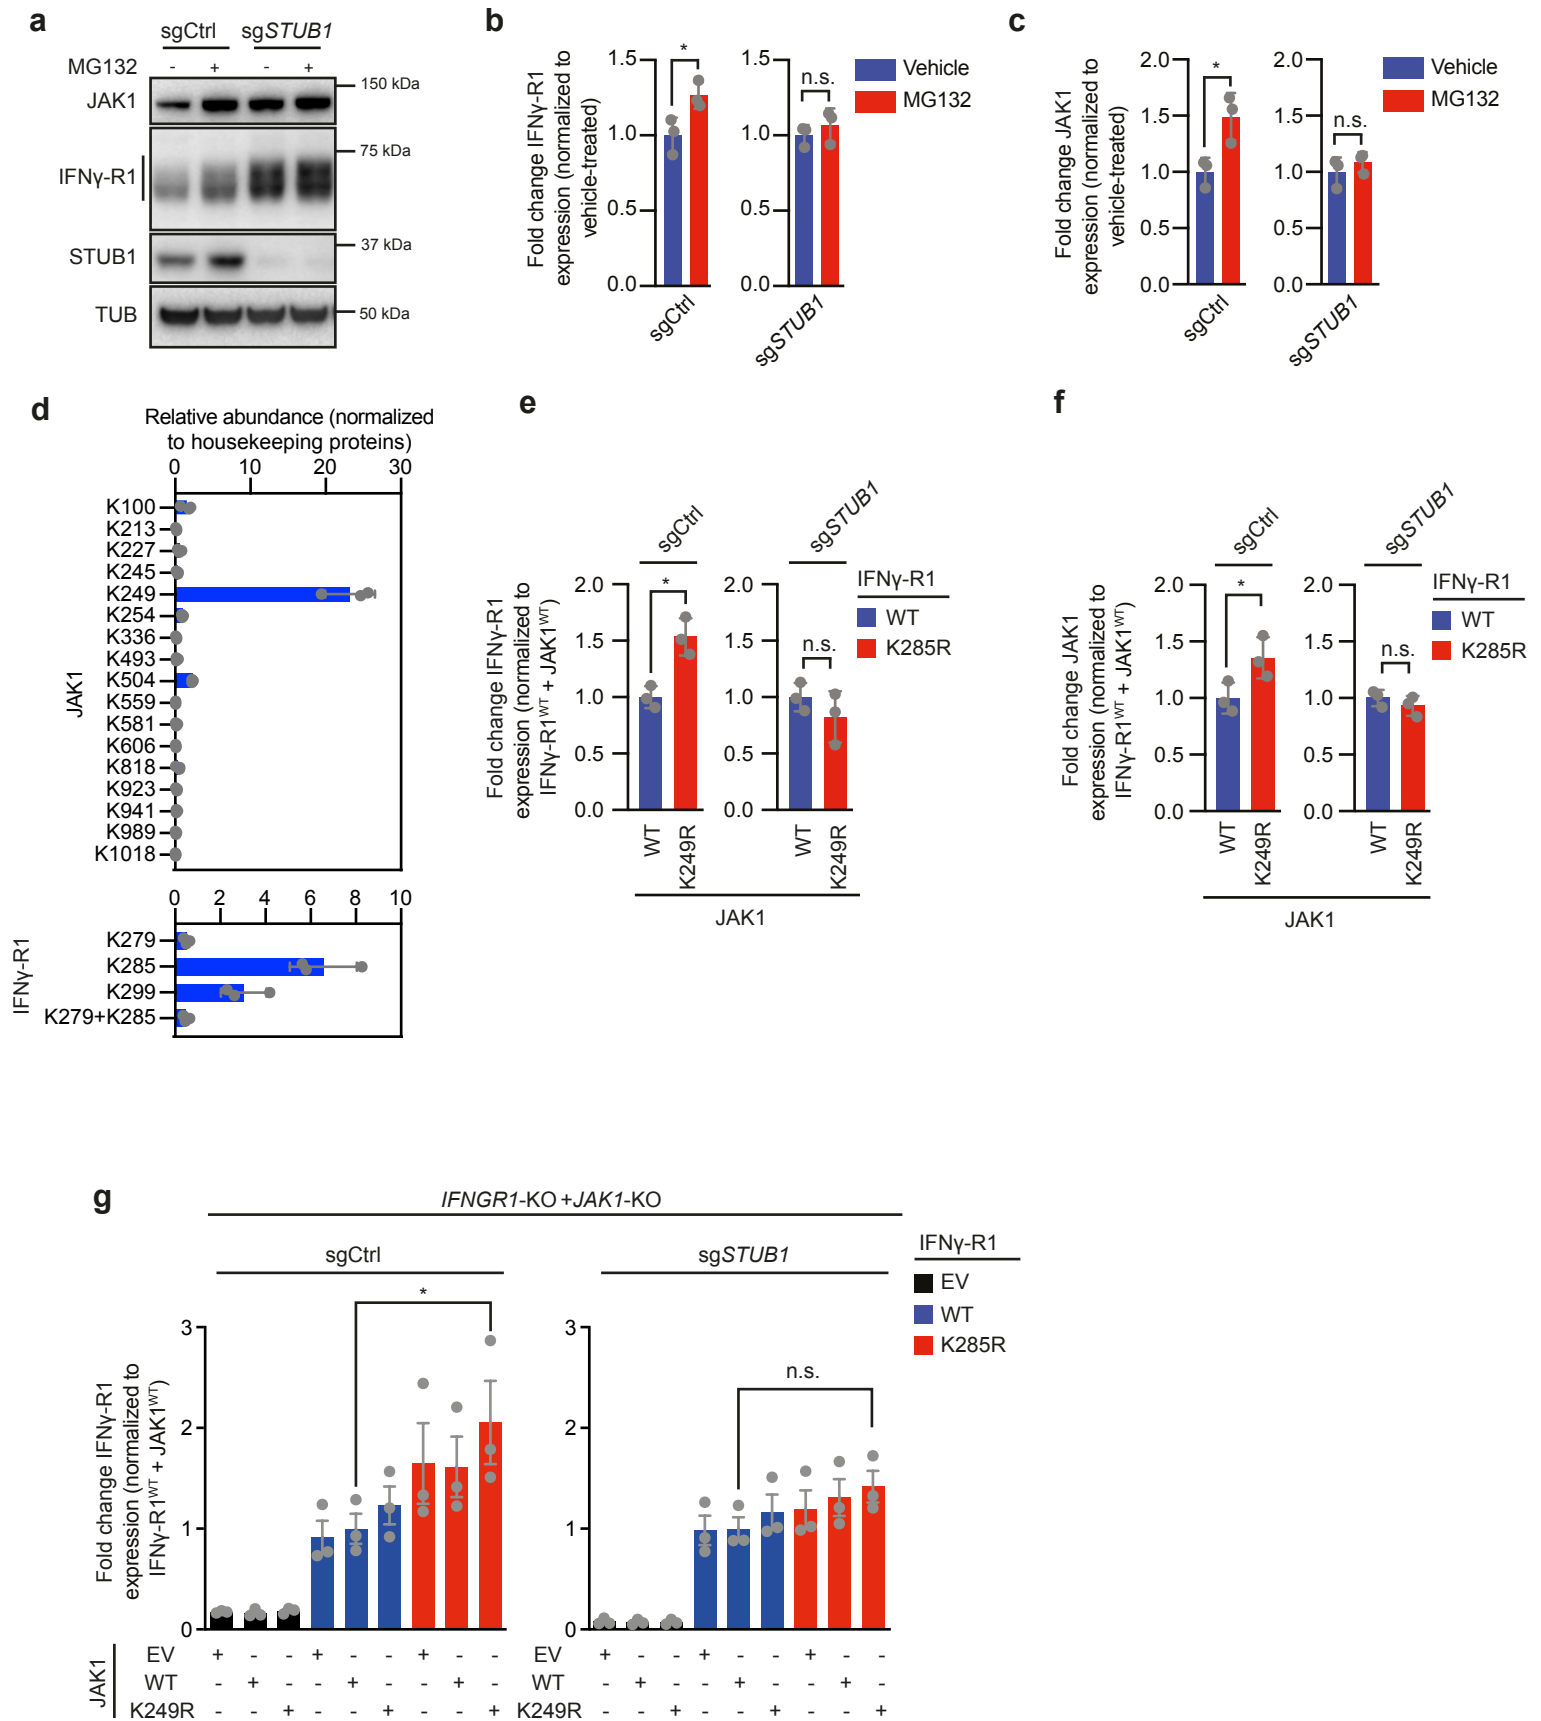

**Supplementary Figure 3: STUB1 drives proteasomal degradation of IFN $\gamma$  receptor complex through IFN $\gamma$ -R1<sup>K285</sup> and JAK1<sup>K249</sup> residues.**

**a**, Immunoblot of SK-MEL-147 cells expressing sgCtrl or sgSTUB1 treated with either vehicle or 10  $\mu$ M MG132 for four hours. Whole-cell lysates (WCL) were immunoblotted for the indicated proteins (TUB is Tubulin). Representative of three biological replicates.

**b**, Densitometric quantification of IFN $\gamma$ -R1 protein levels (relative to loading control and normalized to vehicle-treated group) from (**a**).

**c**, same as in (**b**) but for JAK1 protein.

**d**, Relative abundance of ubiquitinated JAK1 and IFN $\gamma$ -R1 lysine residues in sgCtrl-expressing cells.

**e**, Densitometric quantification of IFN $\gamma$ -R1 protein levels on immunoblot in **Figure 3h** (relative to loading control and normalized to IFN $\gamma$ -R1<sup>WT</sup> and JAK1<sup>WT</sup>-expressing cells) in *IFNGR1*-KO + *JAK1*-KO D10 melanoma clones expressing either IFN $\gamma$ -R1<sup>WT</sup> and JAK1<sup>WT</sup> or with IFN $\gamma$ -R1<sup>K285R</sup> and JAK1<sup>K249R</sup>.

**f**, same as in (**e**) but for JAK1 protein.

**g**, Flow cytometric quantification of IFN $\gamma$ -R1 expression in *IFNGR1*-KO + *JAK1*-KO D10 melanoma clones reconstituted with the indicated *IFNGR1* and *JAK1* cDNAs (outlined in **Figure 3d**), shown as fold-change of IFN $\gamma$ -R1 MFI relative to IFN $\gamma$ -R1<sup>WT</sup> + JAK1<sup>WT</sup>-expressing cells for each respective genotype. EV = empty vector control.

Mean $\pm$ SD in (**b-g**), ordinary one-way ANOVA for three biological replicates with Tukey post hoc testing. \*p=0.0435 (**b**), \*p=0.0138 (**c**), \*p=0.0156 (**e**), \*p=0.0366 (**f**), \*p=0.036 (**g**).

# Supplementary Figure 4

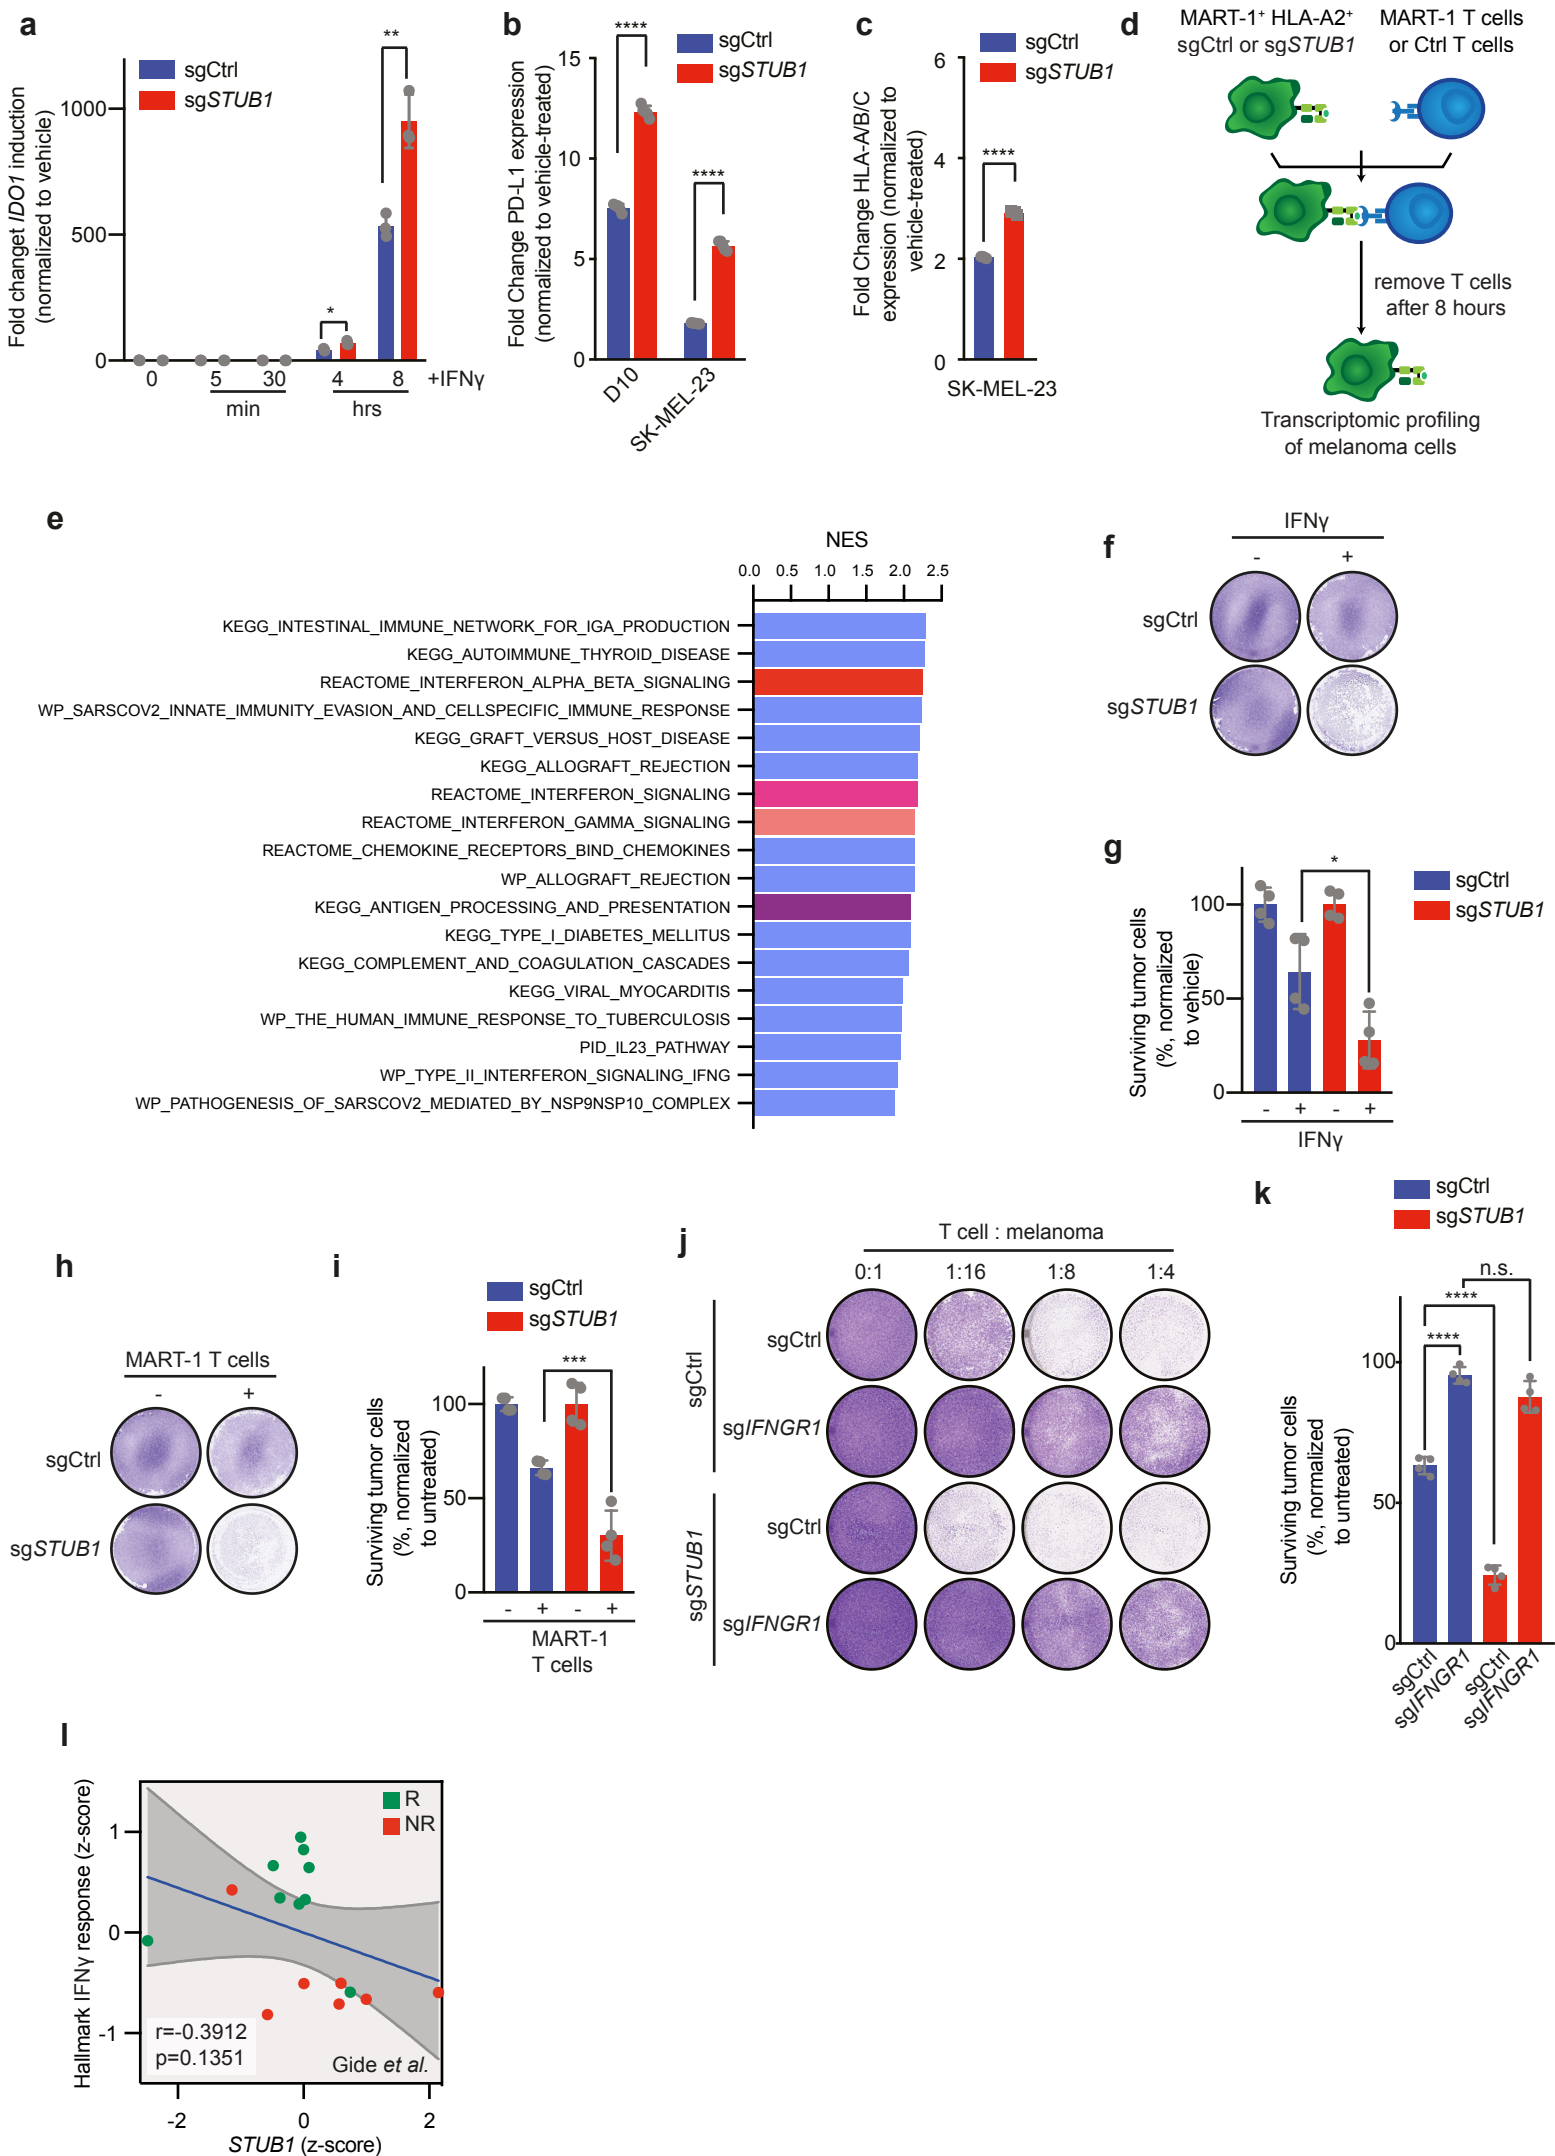

**Supplementary Figure 4: *STUB1* inactivation sensitizes melanoma cells to cytotoxic T cells through amplified IFN $\gamma$  signaling.**

**a**, qPCR analysis for *IDO1* expression in D10 cells expressing sgCtrl or sg*STUB1*, treated with 25 ng/ml IFN $\gamma$  for the indicated duration.

**b**, Flow cytometry analysis of IFN $\gamma$ -induced PD-L1 expression on cells expressing sgCtrl or sg*STUB1* after 24 hours treatment with 5 ng/ml IFN $\gamma$  for D10 cells and 0.5 ng/ml IFN $\gamma$  for SK-MEL-23 cells.

**c**, Flow cytometry analysis of IFN $\gamma$ -induced HLA-A/B/C expression on SK-MEL-23 cells expressing either sgCtrl or sg*STUB1* after 24 hours treatment with 0.5 ng/ml IFN $\gamma$ .

**d**, Schematic outline to transcriptomically profile D10 and SK-MEL-147 cells expressing sgCtrl or sg*STUB1*, after co-cultured with Ctrl or MART-1 T cells for eight hours.

**e**, Gene set enrichment analysis on RNA sequencing results of cells co-cultured with MART-1 T cells shown in **d**. Depicted are enriched gene sets with FDR<0.05. Highlighted gene sets correspond to gene sets in **Figure 4d**.

**f**, Colony formation assay of SK-MEL-147 cells expressing sgCtrl or sg*STUB1*, treated with vehicle or 50 ng/ml IFN $\gamma$  for five days.

**g**, Quantification of colony formation assay in (**f**).

**h**, Colony formation assay of SK-MEL-147 cells expressing sgCtrl or sg*STUB1*, treated with no or MART-1 T cells for 24 hours and subsequent culture for four days.

**i**, Quantification of colony formation assay in (**h**).

**j**, Colony formation assay of SK-MEL-147 cells expressing indicated sgRNAs, that were co-cultured with no T cell or MART-1 T cells indicated ratios for 24 hours and subsequent culture for four days.

**k**, Quantification of colony formation assays from (**j**) at a T cell : melanoma cell ratio of 1:16.

**l**, Spearman correlation of *STUB1* gene expression with the Hallmark IFN $\gamma$  response gene set expression in patients undergoing anti-PD-1 treatment<sup>71</sup>, n=16.

Mean $\pm$ SD in (**a**), \*\*p=0.0034, \*p=0.012, multiple t-tests for three biological replicates. Mean $\pm$ SD in (**b**), \*\*\*\*p<0.0001 for SK-MEL-23, \*\*\*\*p<0.0001, unpaired t-test for five biological replicates.

Mean $\pm$ SD in (**c**), \*\*\*\*p<0.0001, unpaired t-test for five biological replicates.

Mean $\pm$ SD in (**g**, **i**, **k**), ordinary one-way ANOVA for four biological replicates with Tukey post hoc testing. \*p=0.0132 (**g**), \*\*\*p=0.0006 (**i**), \*\*\*\*p<0.0001(**k**).

# Supplementary Figure 5

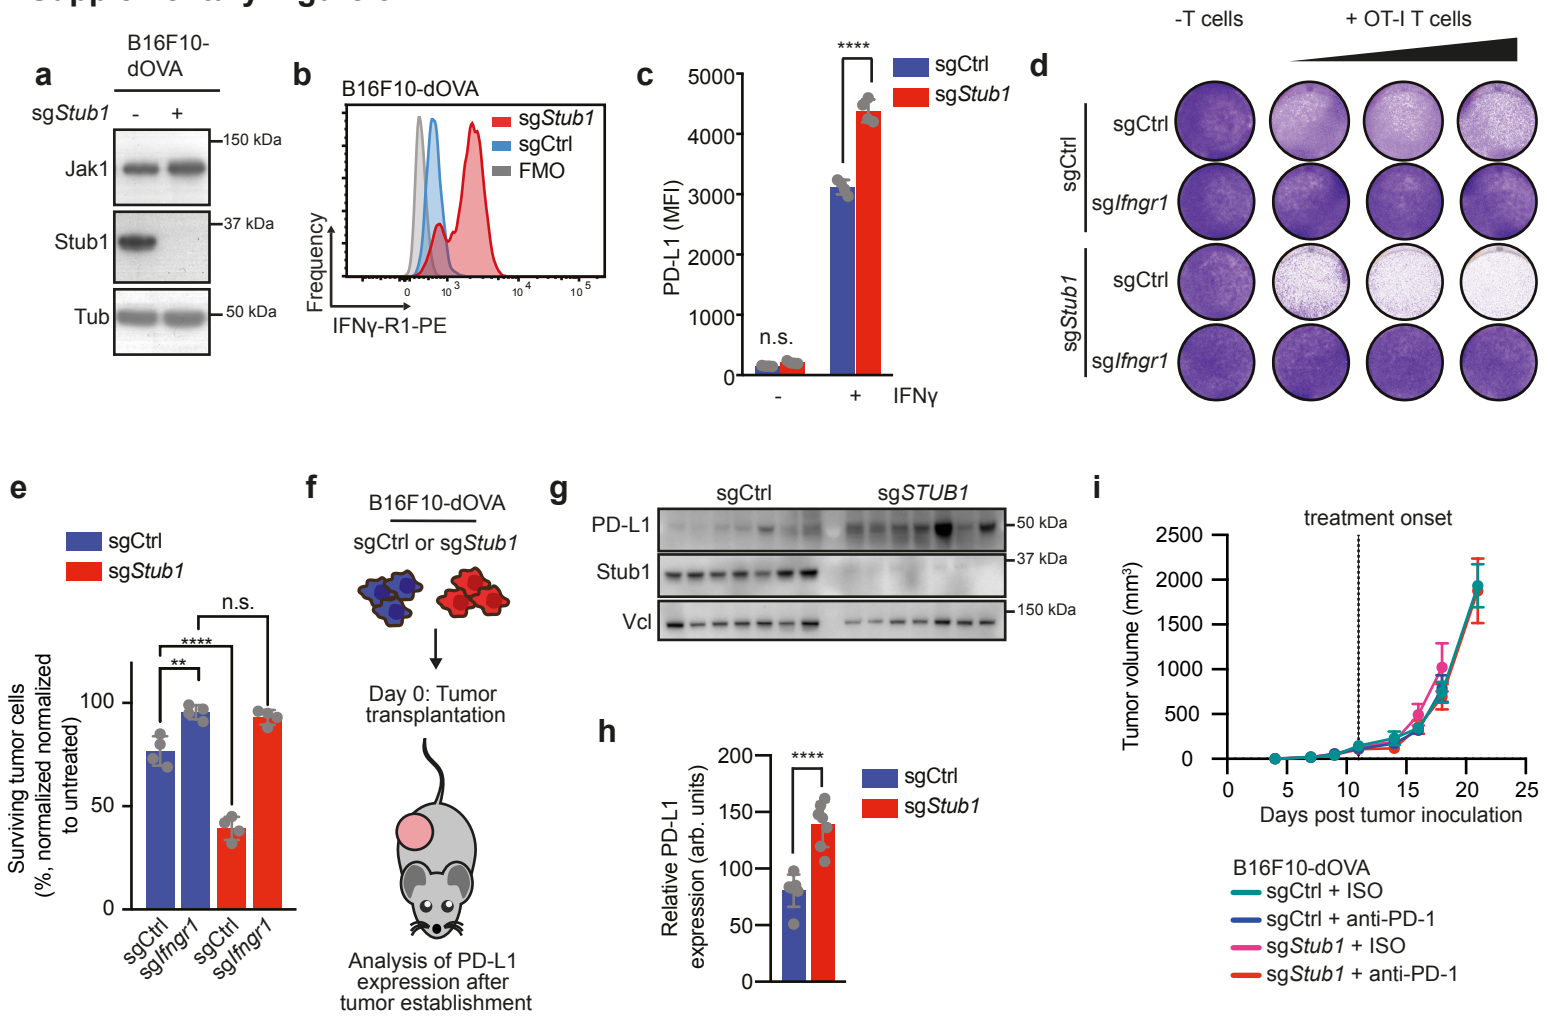

**Supplementary Figure 5: STUB1 inactivation enhances IFN $\gamma$  signaling and increases anti-PD-1 response in heterogeneous tumors with wildtype cells, but not in homogenous STUB1-deficient tumors.**

**a**, Immunoblot of murine melanoma cell line B16F10-dOVA expressing sgCtrl or sg*Stub1*. Whole cell lysates (WCL) were blotted for the indicated proteins (TUB is Tubulin). Representative of three biological replicates.

**b**, Flow cytometry quantification of IFN $\gamma$ -R1 expression in B16F10-dOVA expressing sgCtrl (blue) or sg*Stub1* (red). FMO (grey) = Fluorescence minus one, PE=Phycoerythrin.

**c**, Flow cytometry analysis of IFN $\gamma$ -induced PD-L1 expression in B16F10-dOVA cells expressing sgCtrl or sg*Stub1*. Cells were treated with 12 ng/ml murine IFN $\gamma$  for 24 hours.

**d**, Colony formation assay of B16F10-dOVA melanoma cells expressing the indicated sgRNAs and co-cultured with no T cells or OT-I T cells at T cell : melanoma cell ratios 1:1, 2:1 and 4:1 (left to right).

**e**, Quantification from (**d**) at a T cell : melanoma cell ratio of 4:1.

**f**, Experimental outline to assess PD-L1 expression on either sgCtrl or sg*Stub1*-expressing B16F10-dOVA tumors *in vivo*.

**g**, Immunoblot of B16F10-dOVA *in vivo* tumor samples expressing sgCtrl or sg*Stub1* (outlined in **f**) for the indicated proteins (Vcl is vinculin). n=7 tumors per group.

**h**, Densitometric quantification of PD-L1 protein levels (relative to loading control) of tumor samples from immunoblot shown in (**g**).

**i**, *In vivo* tumor volumes of sgCtrl- or sg*Stub1*-expressing B16F10-dOVA melanoma tumors in immune-competent mice treated with isotype control antibody (ISO) or murine anti-PD-1. Dashed line marks start of a twice-weekly anti-PD-1 treatment.

Mean $\pm$ SD in (**c**, **e**), ordinary one-way ANOVA for four biological replicates with Tukey post hoc testing. \*\*\*\*p < 0.0001 (**c**), \*\*p = 0.0012, \*\*\*\*p < 0.0001 (**e**).

Mean $\pm$ SD in (**h**), \*\*\*\* p < 0.0001, unpaired two-tailed t-test, n=7 tumors per group.

Mean $\pm$ SEM in (**i**), n.s. multiple Mann-Whitney tests for n=10 tumors per group, except B16F10-dOVA sg*Stub1* + anti-PD-1 n=9.

**Supplementary Figure 6**

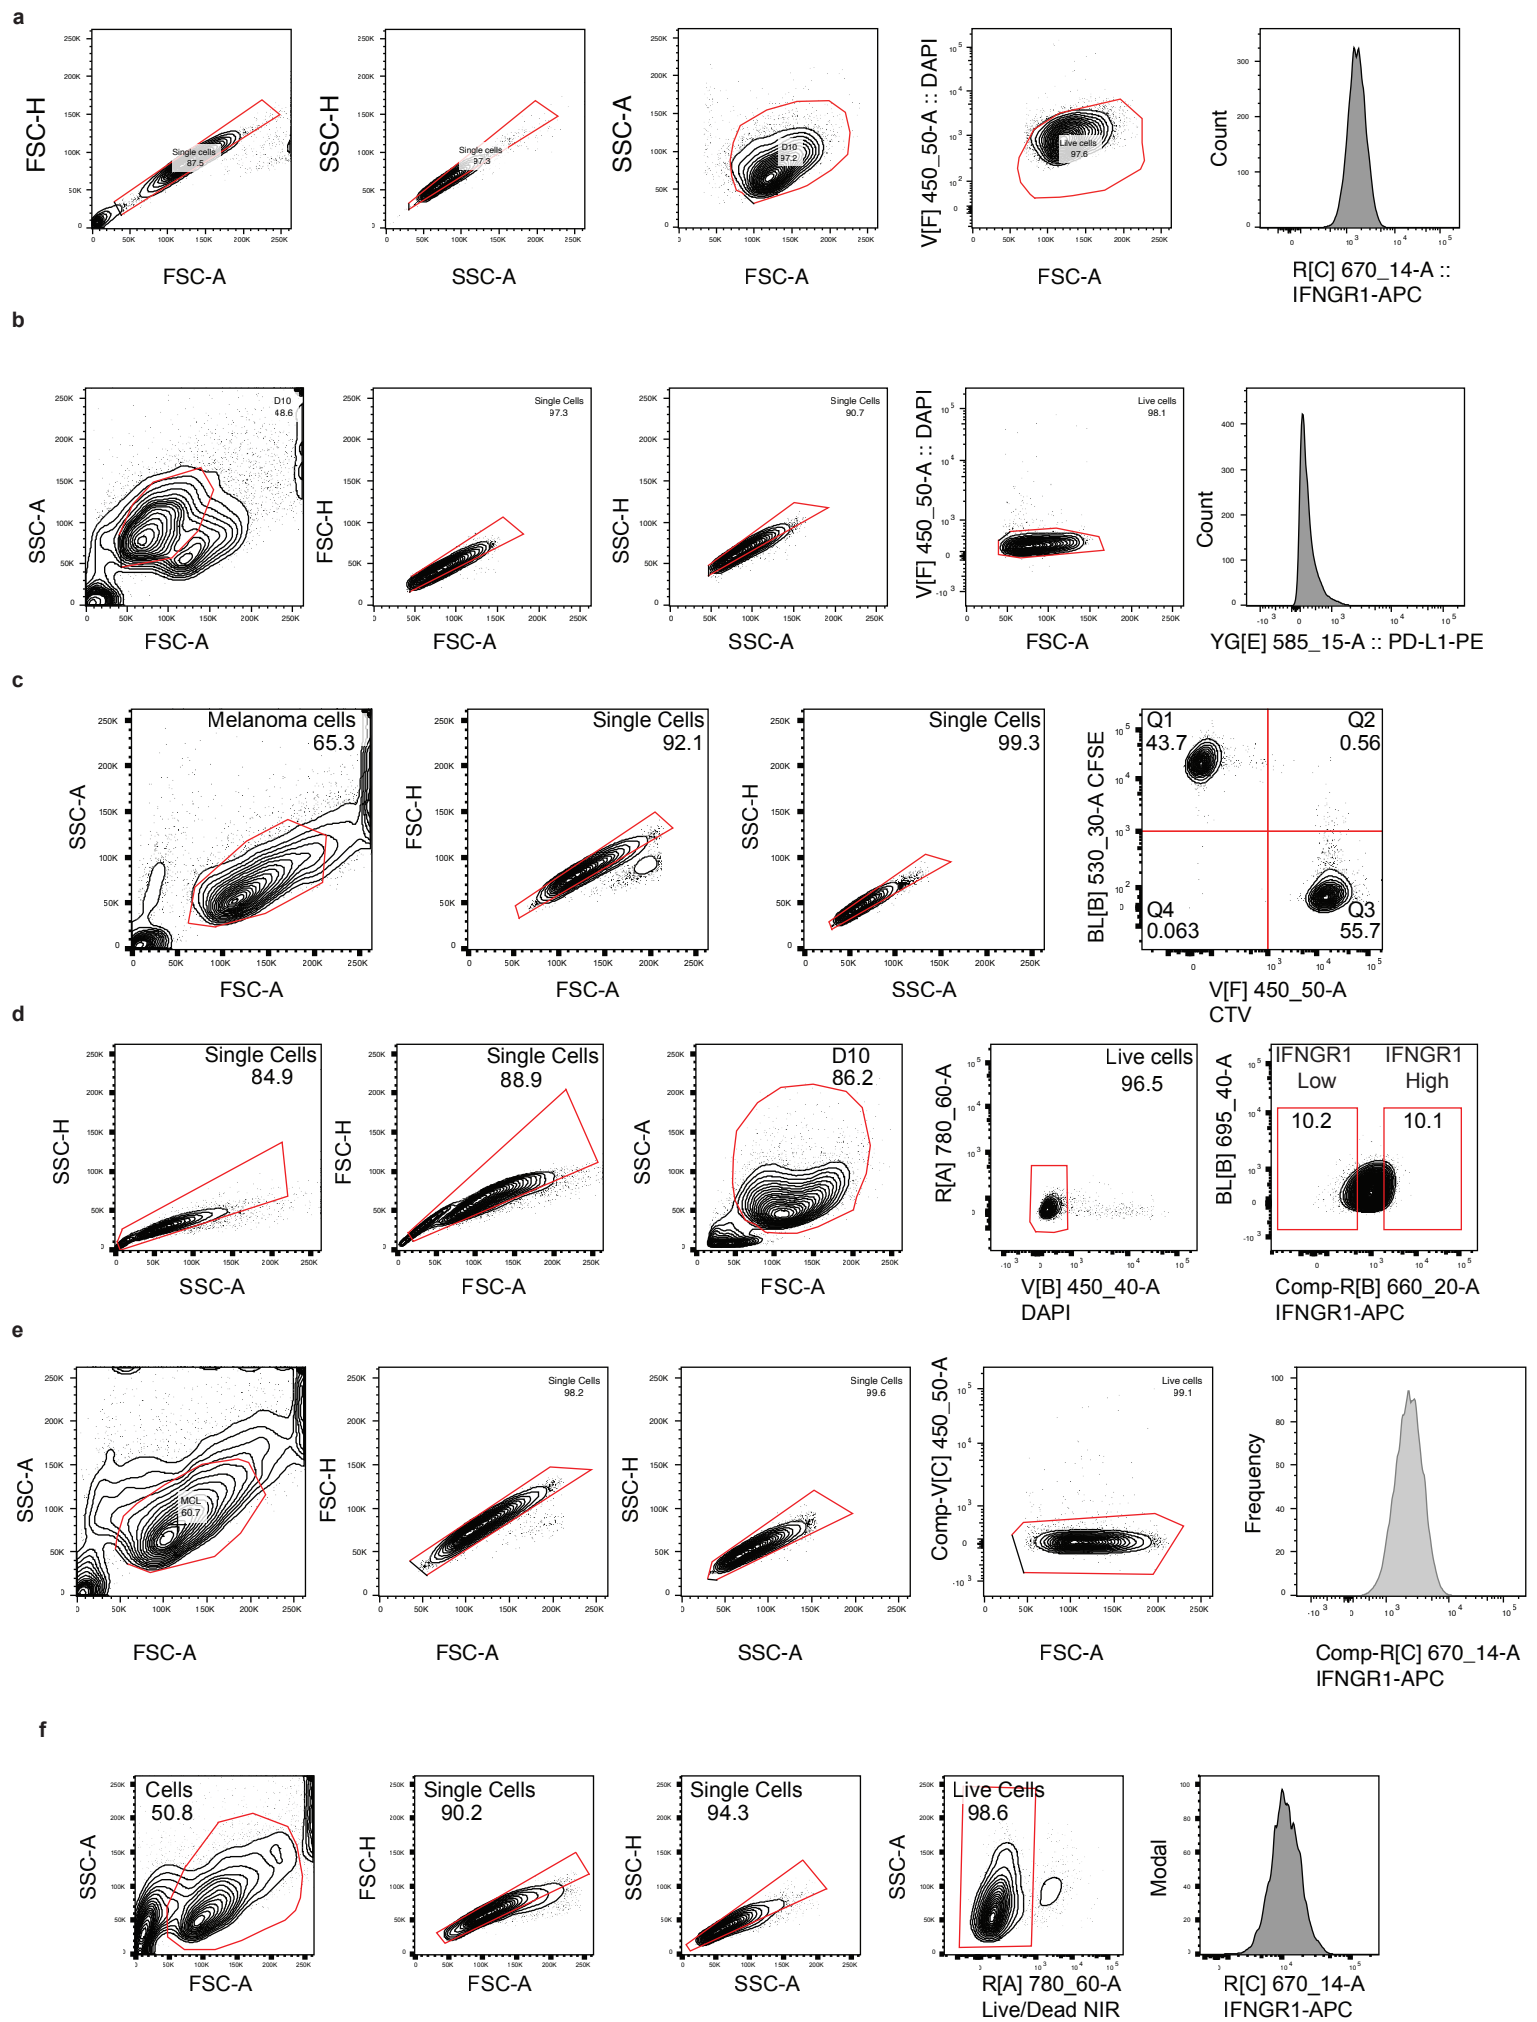

**g**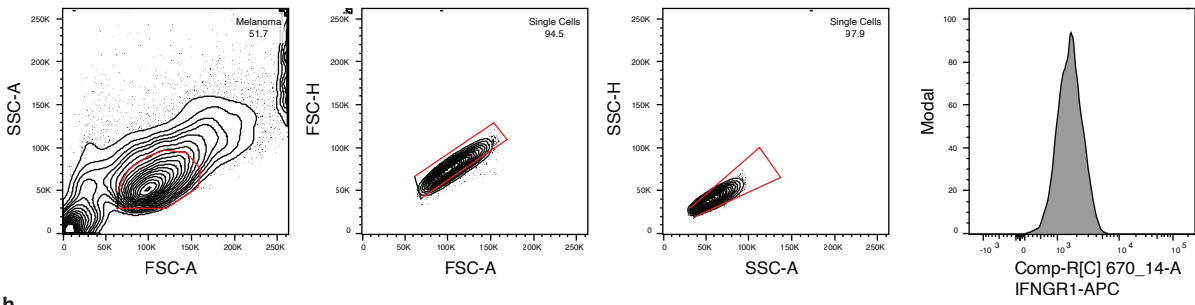**h**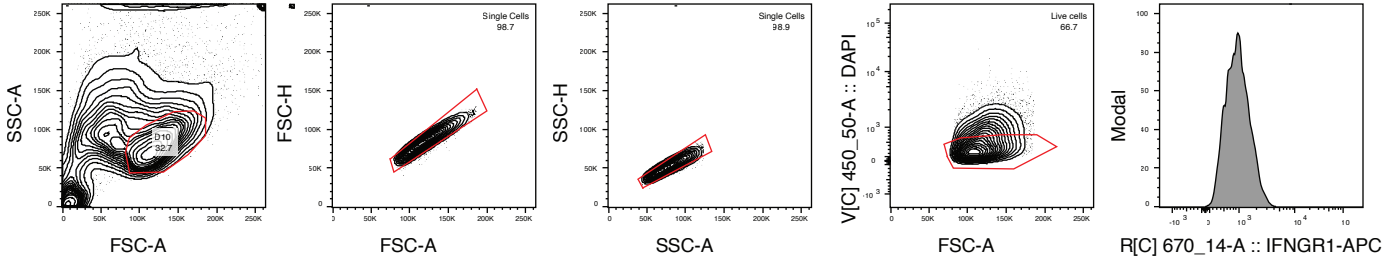**i**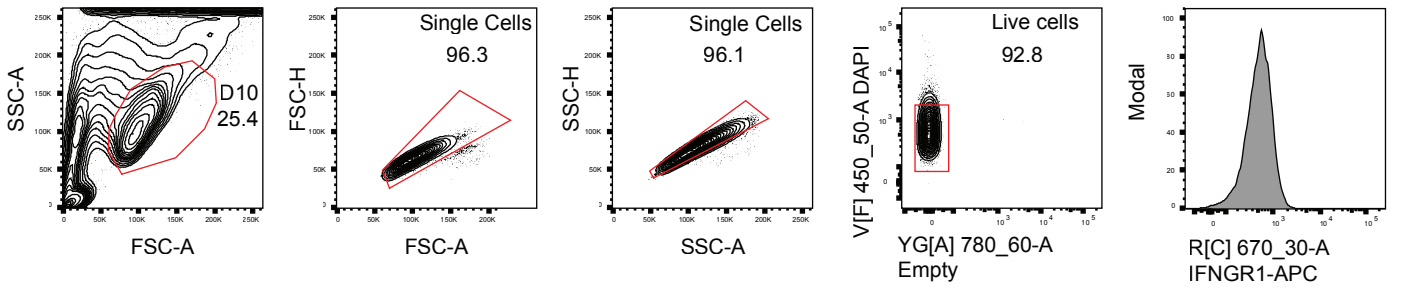**j**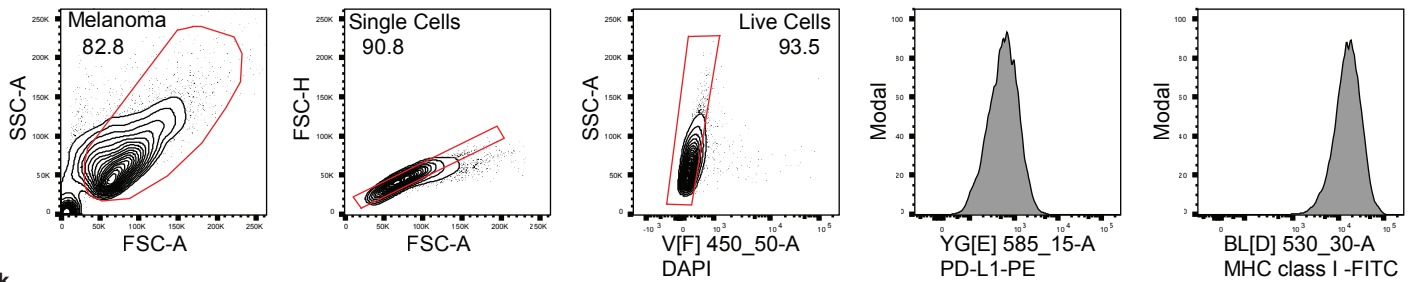**k**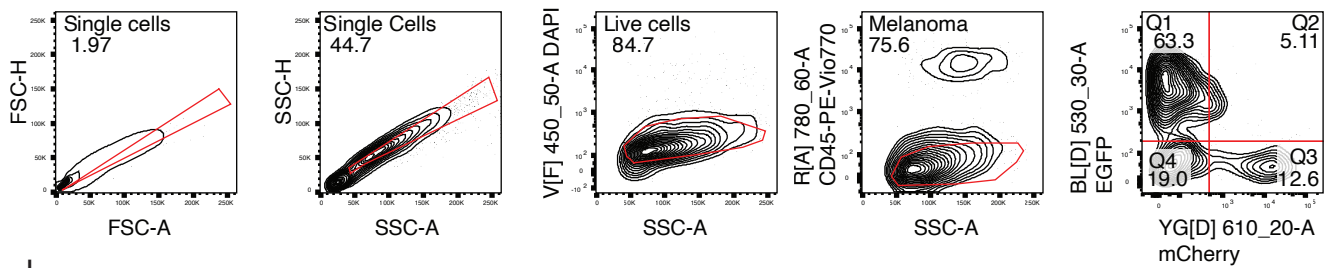**l**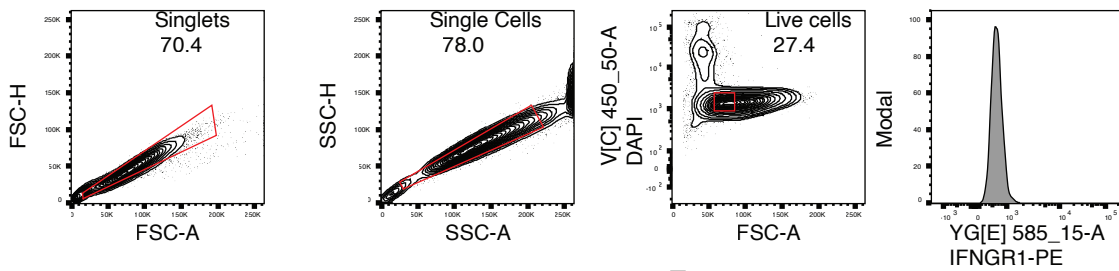**m**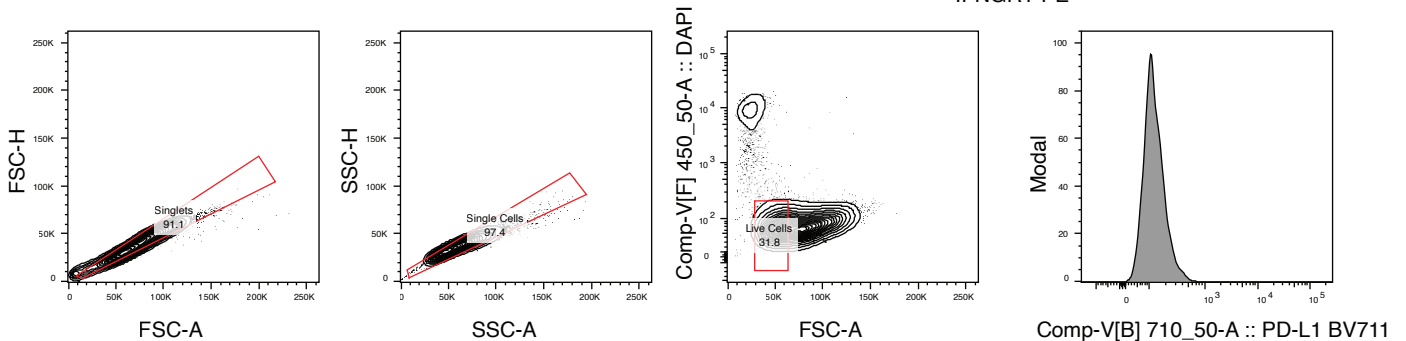

### **Supplementary Figure 6: Gating Strategy for FACS plots**

- a**, Gating strategy corresponding to Figure 1d.
- b**, Gating strategy for Figure 1e and Supplementary Figure 1b.
- c**, Gating strategy for Figure 1f, Supplementary Figure 1c and e.
- d**, Gating strategy for Figure 1g.
- e**, Gating strategy for Figure 1i.
- f**, Gating strategy for Figure 1j, k.
- g**, Gating strategy for Figure 2d and Supplementary Figure 2i.
- h**, Gating strategy for Figure 2j.
- i**, Gating strategy for Figure 3i and Supplementary Figure 3g.
- j**, Gating strategy for Supplementary Figure 4b, c.
- k**, Gating strategy for Figure 5d, e.
- l**, Gating strategy for Supplementary Figure 5b, c.
- m**, Gating strategy for Supplementary Figure 5c.
