# Supplementary material for: Ubiquitin ligase STUB1 destabilizes IFNγ-receptor complex to suppress tumor IFNγ signaling
Source: Springer Nature journal article supplement (doi:10.1038/s41467-022-29442-x), 2022-04-08
Supplement: MOESM4 [file 41467_2022_29442_MOESM4_ESM.pdf]

**Title:** Supplementary Data 1:

**Description:** Read count table for CRISPR/Cas9 knockout screen in D10 cells.

**Title:** Supplementary Data 2:

**Description:** Read count table for CRISPR/Cas9 knockout screen in SK-MEL-23 cells.

**Title:** Supplementary Data 3:

**Description:** DESeq results of T cell response in STUB1-KO cells in D10 and SK-MEL-147 cells.

**Title:** Supplementary Data 4:

**Description:** Gene set enrichment analysis summary table.
