# Supplementary material for: Ubiquitin ligase STUB1 destabilizes IFNγ-receptor complex to suppress tumor IFNγ signaling
Source: Nat Commun. 2022 Apr 8;13:1923. doi: 10.1038/s41467-022-29442-x (PMC8993893; doi:10.1038/s41467-022-29442-x)
Supplement: Supplementary file 5 — Supplementary Data 1 [file 41467_2022_29442_MOESM5_ESM.xlsx]

## Sheet: Supplementary Data_1_Screen D10
name	gene	bulk1	bulk2	neg1	neg2	pos1	pos2	t0_1	t0_2
HGLibA_00001	A1BG	136	124	69	118	43	77	220	277
HGLibA_00002	A1BG	144	135	141	78	83	81	134	126
HGLibA_00003	A1BG	230	245	141	137	137	133	331	238
HGLibA_00004	A1CF	48	27	17	14	122	21	87	33
HGLibA_00005	A1CF	71	65	120	65	15	69	239	214
HGLibA_00006	A1CF	73	93	110	201	25	178	360	249
HGLibA_00007	A2M	36	32	137	49	8	90	257	184
HGLibA_00008	A2M	74	112	56	69	43	32	174	153
HGLibA_00009	A2M	103	31	137	58	26	28	202	142
HGLibA_00010	A2ML1	52	29	86	47	13	68	201	126
HGLibA_00011	A2ML1	145	152	149	113	43	126	305	315
HGLibA_00012	A2ML1	123	62	74	93	29	68	221	153
HGLibA_00013	A3GALT2	79	34	115	33	57	31	105	100
HGLibA_00014	A3GALT2	216	136	92	123	86	105	200	211
HGLibA_00015	A3GALT2	55	66	110	95	7	21	153	111
HGLibA_00016	A4GALT	85	227	91	122	60	161	312	242
HGLibA_00017	A4GALT	279	415	162	211	130	112	427	322
HGLibA_00018	A4GALT	330	190	306	203	98	132	487	386
HGLibA_00019	A4GNT	216	156	154	125	86	150	298	235
HGLibA_00020	A4GNT	18	24	28	19	9	6	82	39
HGLibA_00021	A4GNT	91	112	51	98	25	125	315	155
HGLibA_00022	AAAS	139	77	90	129	51	116	207	183
HGLibA_00023	AAAS	42	17	34	49	17	14	123	81
HGLibA_00024	AAAS	79	22	41	65	12	67	136	111
HGLibA_00025	AACS	128	59	80	54	38	70	247	184
HGLibA_00026	AACS	118	129	175	89	35	141	217	198
HGLibA_00027	AACS	96	61	98	62	22	93	172	221
HGLibA_00028	AADAC	191	172	151	257	100	170	336	197
HGLibA_00029	AADAC	31	7	13	40	12	40	69	88
HGLibA_00030	AADAC	68	36	93	10	20	70	138	145
HGLibA_00031	AADACL2	46	42	62	71	28	108	112	142
HGLibA_00032	AADACL2	139	114	63	80	56	106	335	227
HGLibA_00033	AADACL2	80	57	32	31	55	46	111	84
HGLibA_00034	AADACL3	71	81	39	65	25	66	166	233
HGLibA_00035	AADACL3	93	47	36	18	52	37	117	88
HGLibA_00036	AADACL3	17	43	8	32	10	43	78	37
HGLibA_00037	AADACL4	128	71	87	48	56	77	134	128
HGLibA_00038	AADACL4	213	47	97	67	87	44	110	112
HGLibA_00039	AADACL4	174	203	85	187	61	137	266	165
HGLibA_00040	AADAT	220	120	333	188	89	191	423	363
HGLibA_00041	AADAT	35	42	42	62	1	36	129	112
HGLibA_00042	AADAT	11	7	46	15	5	19	63	70
HGLibA_00043	AAED1	62	44	68	83	3	118	179	168
HGLibA_00044	AAED1	61	86	76	113	6	69	180	246
HGLibA_00045	AAED1	9	1	6	17	0	5	55	29
HGLibA_00046	AAGAB	163	162	200	177	64	142	390	346
HGLibA_00047	AAGAB	148	129	178	108	35	115	554	423
HGLibA_00048	AAGAB	71	40	110	47	3	39	177	178
HGLibA_00049	AAK1	133	120	153	94	42	161	265	223
HGLibA_00050	AAK1	43	51	53	42	18	44	184	201
HGLibA_00051	AAK1	177	98	193	99	37	158	398	306
HGLibA_00052	AAMDC	4	2	23	4	1	12	15	10
HGLibA_00053	AAMDC	66	149	113	168	34	70	207	166
HGLibA_00054	AAMDC	80	33	98	65	15	70	188	103
HGLibA_00055	AAMP	1	0	0	0	0	0	7	21
HGLibA_00056	AAMP	61	30	24	30	22	44	136	99
HGLibA_00057	AAMP	189	156	112	152	38	117	318	324
HGLibA_00058	AANAT	120	206	82	145	12	39	143	122
HGLibA_00059	AANAT	144	127	132	138	95	90	338	257
HGLibA_00060	AANAT	45	37	10	77	26	4	101	47
HGLibA_00061	AAR2	13	38	12	31	1	31	164	206
HGLibA_00062	AAR2	177	153	284	162	43	229	503	451
HGLibA_00063	AAR2	13	16	35	14	1	28	42	24
HGLibA_00064	AARD	91	62	54	36	27	59	95	75
HGLibA_00065	AARD	159	96	139	112	45	89	298	193
HGLibA_00066	AARD	91	69	59	104	32	122	205	174
HGLibA_00067	AARS	28	57	13	76	47	20	246	184
HGLibA_00068	AARS	0	0	0	0	0	0	36	8
HGLibA_00069	AARS	251	310	162	227	65	166	267	207
HGLibA_00070	AARS2	120	85	143	76	53	46	357	330
HGLibA_00071	AARS2	7	3	8	0	0	10	80	61
HGLibA_00072	AARS2	121	105	108	88	30	109	240	214
HGLibA_00073	AARSD1	64	58	142	54	36	66	117	130
HGLibA_00074	AARSD1	187	178	169	149	68	167	239	315
HGLibA_00075	AARSD1	99	68	162	67	15	75	331	232
HGLibA_00076	AASDH	142	193	157	156	20	104	362	419
HGLibA_00077	AASDH	163	128	214	204	33	240	430	453
HGLibA_00078	AASDH	83	62	109	45	24	45	160	135
HGLibA_00079	AASDHPPT	75	58	74	39	53	52	279	239
HGLibA_00080	AASDHPPT	122	66	118	88	22	26	346	332
HGLibA_00081	AASDHPPT	88	53	97	87	28	38	290	194
HGLibA_00082	AASS	34	10	20	7	10	17	60	38
HGLibA_00083	AASS	35	36	67	49	17	61	211	147
HGLibA_00084	AASS	47	24	40	24	14	79	121	157
HGLibA_00085	AATF	13	21	13	19	0	35	79	132
HGLibA_00086	AATF	155	130	235	171	47	153	259	206
HGLibA_00087	AATF	38	50	38	28	5	6	198	127
HGLibA_00088	AATK	55	25	56	27	10	2	52	72
HGLibA_00089	AATK	109	21	46	43	57	15	82	74
HGLibA_00090	AATK	325	256	268	223	132	182	470	301
HGLibA_00091	ABAT	69	46	44	60	28	41	171	136
HGLibA_00092	ABAT	155	114	90	72	79	49	190	185
HGLibA_00093	ABAT	186	160	97	161	88	84	270	245
HGLibA_00094	ABCA1	146	86	123	86	80	65	151	168
HGLibA_00095	ABCA1	125	163	96	138	1245	96	251	225
HGLibA_00096	ABCA1	58	25	40	39	10	88	82	113
HGLibA_00097	ABCA10	59	94	86	41	9	122	189	211
HGLibA_00098	ABCA10	111	56	159	128	19	182	402	239
HGLibA_00099	ABCA10	217	121	143	177	39	199	358	397
HGLibA_00100	ABCA12	44	43	64	88	15	56	150	130
HGLibA_00101	ABCA12	146	101	93	172	81	109	267	159
HGLibA_00102	ABCA12	23	5	69	18	2	48	101	108
HGLibA_00103	ABCA13	124	78	76	74	29	47	205	201
HGLibA_00104	ABCA13	153	61	188	88	30	122	375	378
HGLibA_00105	ABCA13	82	37	16	36	27	85	123	113
HGLibA_00106	ABCA2	182	153	155	162	82	112	361	285
HGLibA_00107	ABCA2	62	55	84	51	9	43	115	102
HGLibA_00108	ABCA2	11	13	14	10	0	28	71	44
HGLibA_00109	ABCA3	184	157	156	118	107	115	277	199
HGLibA_00110	ABCA3	63	26	60	26	9	34	129	55
HGLibA_00111	ABCA3	102	89	82	65	17	75	144	128
HGLibA_00112	ABCA4	121	62	123	100	11	95	307	193
HGLibA_00113	ABCA4	122	111	82	75	57	70	207	194
HGLibA_00114	ABCA4	93	74	172	80	53	97	251	243
HGLibA_00115	ABCA5	139	128	143	117	23	136	372	258
HGLibA_00116	ABCA5	26	15	28	42	8	25	149	123
HGLibA_00117	ABCA5	170	113	214	72	109	146	362	311
HGLibA_00118	ABCA6	109	69	148	63	14	133	229	292
HGLibA_00119	ABCA6	58	35	46	105	9	90	158	207
HGLibA_00120	ABCA6	52	20	106	39	6	103	205	117
HGLibA_00121	ABCA7	38	38	32	47	4	10	93	26
HGLibA_00122	ABCA7	102	83	159	58	22	93	183	147
HGLibA_00123	ABCA7	81	241	113	165	22	132	214	179
HGLibA_00124	ABCA8	100	105	96	157	23	116	270	218
HGLibA_00125	ABCA8	28	18	68	36	13	37	132	135
HGLibA_00126	ABCA8	103	91	131	96	24	87	263	248
HGLibA_00127	ABCA9	257	200	337	193	49	204	666	529
HGLibA_00128	ABCA9	48	19	21	13	8	3	84	68
HGLibA_00129	ABCA9	18	7	51	6	12	4	38	24
HGLibA_00130	ABCB1	56	23	20	23	8	11	17	39
HGLibA_00131	ABCB1	92	55	116	86	9	161	387	223
HGLibA_00132	ABCB1	31	36	17	33	22	46	54	51
HGLibA_00133	ABCB10	202	139	256	129	31	138	333	232
HGLibA_00134	ABCB10	134	110	139	88	52	76	278	187
HGLibA_00135	ABCB10	183	133	111	101	83	92	284	190
HGLibA_00136	ABCB11	36	4	41	15	8	10	163	76
HGLibA_00137	ABCB11	93	37	69	82	38	44	208	146
HGLibA_00138	ABCB11	20	27	68	33	0	23	101	108
HGLibA_00139	ABCB4	199	176	190	192	38	131	302	185
HGLibA_00140	ABCB4	160	176	57	107	85	152	222	170
HGLibA_00141	ABCB4	195	153	254	213	67	229	347	226
HGLibA_00142	ABCB5	94	130	110	67	58	97	241	152
HGLibA_00143	ABCB5	62	50	38	62	58	39	112	103
HGLibA_00144	ABCB5	162	84	114	156	36	160	383	247
HGLibA_00145	ABCB6	214	156	143	191	62	125	303	312
HGLibA_00146	ABCB6	103	105	131	123	37	126	308	281
HGLibA_00147	ABCB6	104	126	118	59	23	75	218	150
HGLibA_00148	ABCB7	122	59	98	86	32	31	384	374
HGLibA_00149	ABCB7	9	0	16	22	2	21	52	102
HGLibA_00150	ABCB7	29	28	12	29	9	22	178	140
HGLibA_00151	ABCB8	167	189	73	92	78	118	261	200
HGLibA_00152	ABCB8	206	149	241	172	37	318	512	391
HGLibA_00153	ABCB8	93	42	77	38	11	15	148	122
HGLibA_00154	ABCB9	72	52	44	61	17	81	107	86
HGLibA_00155	ABCB9	190	79	142	89	54	90	236	195
HGLibA_00156	ABCB9	62	58	42	93	14	80	282	268
HGLibA_00157	ABCC1	174	156	110	164	57	140	225	209
HGLibA_00158	ABCC1	67	64	54	40	31	80	177	108
HGLibA_00159	ABCC1	28	56	40	50	5	23	128	79
HGLibA_00160	ABCC10	281	192	194	166	41	179	289	272
HGLibA_00161	ABCC10	21	28	19	58	5	33	56	49
HGLibA_00162	ABCC10	186	103	151	175	48	161	374	310
HGLibA_00163	ABCC11	251	193	119	83	79	54	146	158
HGLibA_00164	ABCC11	109	147	122	82	47	80	231	194
HGLibA_00165	ABCC11	176	72	132	99	60	136	323	254
HGLibA_00166	ABCC12	109	122	78	105	27	70	153	141
HGLibA_00167	ABCC12	193	132	116	155	57	200	276	198
HGLibA_00168	ABCC12	222	230	177	178	71	167	432	301
HGLibA_00169	ABCC2	54	27	64	16	9	26	66	115
HGLibA_00170	ABCC2	7	6	50	13	1	2	31	67
HGLibA_00171	ABCC2	138	85	88	66	48	27	124	145
HGLibA_00172	ABCC3	23	15	17	4	6	7	86	56
HGLibA_00173	ABCC3	128	59	101	29	50	69	167	112
HGLibA_00174	ABCC3	125	163	124	101	73	142	238	260
HGLibA_00175	ABCC4	68	43	32	41	16	98	119	166
HGLibA_00176	ABCC4	133	69	210	136	35	177	352	282
HGLibA_00177	ABCC4	145	95	106	126	19	69	249	127
HGLibA_00178	ABCC5	46	68	42	51	32	32	112	143
HGLibA_00179	ABCC5	35	65	21	17	26	42	104	66
HGLibA_00180	ABCC5	98	74	115	72	29	45	223	151
HGLibA_00181	ABCC6	200	98	152	167	42	117	356	403
HGLibA_00182	ABCC6	83	17	42	41	24	5	176	112
HGLibA_00183	ABCC6	83	88	75	149	51	47	242	245
HGLibA_00184	ABCC8	33	44	29	38	21	14	89	87
HGLibA_00185	ABCC8	246	231	278	253	134	199	422	435
HGLibA_00186	ABCC8	76	28	44	70	20	55	180	108
HGLibA_00187	ABCC9	198	152	197	212	38	117	421	369
HGLibA_00188	ABCC9	63	30	42	41	5	51	163	100
HGLibA_00189	ABCC9	5	3	13	15	2	39	90	52
HGLibA_00190	ABCD1	85	59	83	75	76	50	69	76
HGLibA_00191	ABCD1	134	116	138	95	82	70	252	170
HGLibA_00192	ABCD1	124	160	55	153	32	126	158	131
HGLibA_00193	ABCD2	154	147	123	209	44	94	202	217
HGLibA_00194	ABCD2	145	88	90	110	33	85	201	147
HGLibA_00195	ABCD2	12	9	26	2	2	10	111	57
HGLibA_00196	ABCD3	156	94	215	69	27	205	348	266
HGLibA_00197	ABCD3	101	46	110	88	23	111	308	239
HGLibA_00198	ABCD3	61	31	125	48	13	86	158	166
HGLibA_00199	ABCD4	248	170	144	194	106	109	245	230
HGLibA_00200	ABCD4	204	152	195	208	86	197	429	369
HGLibA_00201	ABCD4	64	59	45	31	28	31	98	103
HGLibA_00202	ABCE1	47	26	205	89	13	222	379	295
HGLibA_00203	ABCE1	95	52	137	126	51	33	250	297
HGLibA_00204	ABCE1	12	10	50	3	0	12	115	97
HGLibA_00205	ABCF1	27	16	14	38	5	28	56	97
HGLibA_00206	ABCF1	19	26	51	36	15	55	250	151
HGLibA_00207	ABCF1	58	88	93	87	33	110	215	210
HGLibA_00208	ABCF2	64	36	20	26	60	17	117	105
HGLibA_00209	ABCF2	72	56	38	62	43	76	126	87
HGLibA_00210	ABCF2	166	66	112	94	69	146	296	338
HGLibA_00211	ABCF3	121	140	73	119	39	180	323	278
HGLibA_00212	ABCF3	148	82	61	88	47	51	204	216
HGLibA_00213	ABCF3	82	63	100	46	12	40	88	124
HGLibA_00214	ABCG1	234	127	77	109	55	40	205	150
HGLibA_00215	ABCG1	128	62	48	93	46	58	104	147
HGLibA_00216	ABCG1	49	29	84	52	9	69	145	131
HGLibA_00217	ABCG2	82	44	129	45	20	46	205	114
HGLibA_00218	ABCG2	132	58	61	105	33	73	148	123
HGLibA_00219	ABCG2	193	117	273	168	38	256	695	479
HGLibA_00220	ABCG4	428	412	272	344	234	219	493	420
HGLibA_00221	ABCG4	50	41	42	79	35	45	99	62
HGLibA_00222	ABCG4	214	236	221	285	104	175	495	338
HGLibA_00223	ABCG5	59	51	83	39	21	31	170	108
HGLibA_00224	ABCG5	42	20	79	9	5	52	89	68
HGLibA_00225	ABCG5	85	90	50	52	69	67	218	78
HGLibA_00226	ABCG8	45	61	40	29	6	45	74	63
HGLibA_00227	ABCG8	50	26	23	26	51	12	70	50
HGLibA_00228	ABCG8	52	18	46	54	14	46	220	187
HGLibA_00229	ABHD1	51	43	32	53	5	41	89	82
HGLibA_00230	ABHD1	92	40	146	54	22	61	222	107
HGLibA_00231	ABHD1	44	28	80	40	0	54	123	74
HGLibA_00232	ABHD10	51	23	61	17	6	39	65	37
HGLibA_00233	ABHD10	66	34	31	57	24	27	126	64
HGLibA_00234	ABHD10	77	47	163	42	19	41	191	178
HGLibA_00235	ABHD11	81	67	56	120	55	49	189	172
HGLibA_00236	ABHD11	58	46	23	73	61	25	116	102
HGLibA_00237	ABHD11	33	26	56	34	5	35	166	83
HGLibA_00238	ABHD12	198	153	74	72	97	52	167	146
HGLibA_00239	ABHD12	127	96	31	56	98	94	137	138
HGLibA_00240	ABHD12	230	180	276	245	70	209	584	456
HGLibA_00241	ABHD12B	221	135	109	125	93	126	347	245
HGLibA_00242	ABHD12B	231	174	264	121	160	119	245	253
HGLibA_00243	ABHD12B	81	65	101	62	18	55	154	184
HGLibA_00244	ABHD13	88	124	52	83	52	112	128	149
HGLibA_00245	ABHD13	75	20	87	60	7	46	124	129
HGLibA_00246	ABHD13	452	184	293	156	142	179	492	438
HGLibA_00247	ABHD14A	50	16	42	30	15	22	134	92
HGLibA_00248	ABHD14A	72	79	226	154	20	109	370	162
HGLibA_00249	ABHD14A	37	49	65	49	15	124	91	115
HGLibA_00250	ABHD14B	180	197	168	117	19	105	381	384
HGLibA_00251	ABHD14B	159	136	79	119	56	98	283	238
HGLibA_00252	ABHD14B	112	44	44	48	25	62	158	157
HGLibA_00253	ABHD15	76	113	28	67	116	49	105	116
HGLibA_00254	ABHD15	66	32	88	32	52	34	123	72
HGLibA_00255	ABHD15	108	52	72	55	35	41	200	169
HGLibA_00256	ABHD16A	9	37	8	47	12	8	17	19
HGLibA_00257	ABHD16A	25	60	49	56	12	34	146	97
HGLibA_00258	ABHD16A	150	70	82	116	15	40	324	212
HGLibA_00259	ABHD16B	58	91	33	118	50	55	165	132
HGLibA_00260	ABHD16B	455	379	232	201	485	152	362	293
HGLibA_00261	ABHD16B	163	160	150	231	84	152	376	295
HGLibA_00262	ABHD17A	35	7	29	8	18	0	68	70
HGLibA_00263	ABHD17A	25	1	16	0	1	12	50	32
HGLibA_00264	ABHD17A	82	101	87	151	42	84	262	305
HGLibA_00265	ABHD17B	86	59	67	49	28	61	103	117
HGLibA_00266	ABHD17B	20	8	79	15	2	19	149	57
HGLibA_00267	ABHD17B	145	40	20	116	41	31	177	139
HGLibA_00268	ABHD17C	154	118	99	51	113	109	193	108
HGLibA_00269	ABHD17C	137	139	187	181	130	95	305	222
HGLibA_00270	ABHD17C	45	50	17	26	89	28	60	67
HGLibA_00271	ABHD2	16	17	61	26	6	47	82	54
HGLibA_00272	ABHD2	360	288	212	246	151	248	489	344
HGLibA_00273	ABHD2	35	70	25	42	9	58	98	132
HGLibA_00274	ABHD3	77	60	54	75	23	38	225	191
HGLibA_00275	ABHD3	104	172	82	139	61	69	311	257
HGLibA_00276	ABHD3	112	63	107	83	61	76	229	183
HGLibA_00277	ABHD4	223	88	195	138	104	107	327	271
HGLibA_00278	ABHD4	114	114	71	126	65	101	156	105
HGLibA_00279	ABHD4	158	109	149	205	69	156	262	236
HGLibA_00280	ABHD5	85	61	139	78	28	117	178	146
HGLibA_00281	ABHD5	94	96	165	110	16	92	262	209
HGLibA_00282	ABHD5	99	58	147	67	19	86	150	206
HGLibA_00283	ABHD6	98	49	63	36	12	77	127	120
HGLibA_00284	ABHD6	31	20	29	15	2	9	105	70
HGLibA_00285	ABHD6	81	30	170	76	10	64	266	219
HGLibA_00286	ABHD8	325	283	229	206	161	158	377	229
HGLibA_00287	ABHD8	61	84	28	23	84	38	66	84
HGLibA_00288	ABHD8	66	71	45	41	42	64	103	94
HGLibA_00289	ABI1	221	168	133	147	74	154	266	177
HGLibA_00290	ABI1	154	161	177	151	58	209	402	315
HGLibA_00291	ABI1	79	61	269	93	12	114	558	365
HGLibA_00292	ABI2	81	103	59	72	24	76	158	156
HGLibA_00293	ABI2	122	88	119	181	21	130	258	187
HGLibA_00294	ABI2	83	65	81	113	26	79	254	203
HGLibA_00295	ABI3	29	69	21	46	14	28	94	89
HGLibA_00296	ABI3	121	161	78	76	39	116	216	156
HGLibA_00297	ABI3	121	77	110	121	23	81	208	203
HGLibA_00298	ABI3BP	102	112	105	61	19	171	264	206
HGLibA_00299	ABI3BP	73	43	60	96	8	75	66	48
HGLibA_00300	ABI3BP	140	69	136	83	108	38	249	226
HGLibA_00301	ABL1	151	145	153	119	73	77	454	328
HGLibA_00302	ABL1	268	153	78	237	133	135	343	346
HGLibA_00303	ABL1	88	79	69	48	15	94	173	116
HGLibA_00304	ABL2	246	302	181	305	125	158	378	313
HGLibA_00305	ABL2	101	65	115	96	53	51	167	76
HGLibA_00306	ABL2	567	653	425	601	385	363	873	809
HGLibA_00307	ABLIM1	54	37	64	36	11	17	112	159
HGLibA_00308	ABLIM1	137	96	141	152	50	80	273	264
HGLibA_00309	ABLIM1	185	127	118	123	49	130	249	203
HGLibA_00310	ABLIM2	164	110	116	154	61	160	234	276
HGLibA_00311	ABLIM2	67	65	30	34	35	70	219	162
HGLibA_00312	ABLIM2	78	67	112	45	17	76	185	156
HGLibA_00313	ABLIM3	144	123	108	132	21	106	157	207
HGLibA_00314	ABLIM3	51	29	30	31	16	69	82	80
HGLibA_00315	ABLIM3	213	92	173	130	73	173	281	297
HGLibA_00316	ABO	129	31	140	48	20	118	298	226
HGLibA_00317	ABO	15	19	52	8	15	18	35	46
HGLibA_00318	ABO	41	92	28	11	34	76	181	155
HGLibA_00319	ABP1	311	299	280	267	111	149	449	395
HGLibA_00320	ABP1	308	258	241	293	102	198	359	341
HGLibA_00321	ABP1	387	337	348	189	143	203	623	443
HGLibA_00322	ABR	42	31	29	14	3	69	129	131
HGLibA_00323	ABR	246	120	102	182	58	132	191	163
HGLibA_00324	ABR	76	104	61	127	31	83	163	244
HGLibA_00325	ABRA	121	94	144	101	37	97	286	200
HGLibA_00326	ABRA	78	116	135	56	46	141	238	185
HGLibA_00327	ABRA	358	321	296	226	216	118	331	277
HGLibA_00328	ABRACL	43	12	62	27	7	30	119	59
HGLibA_00329	ABRACL	53	55	102	68	7	108	145	145
HGLibA_00330	ABRACL	32	24	32	39	12	25	139	85
HGLibA_00331	ABT1	204	267	177	224	217	182	387	436
HGLibA_00332	ABT1	23	25	6	46	41	4	137	132
HGLibA_00333	ABT1	74	58	67	93	35	28	229	200
HGLibA_00334	ABTB1	44	91	65	111	48	25	123	94
HGLibA_00335	ABTB1	131	93	151	124	21	119	250	193
HGLibA_00336	ABTB1	241	282	89	245	83	96	277	302
HGLibA_00337	ABTB2	124	198	30	137	48	77	227	157
HGLibA_00338	ABTB2	242	160	111	126	49	88	259	228
HGLibA_00339	ABTB2	226	147	78	150	110	98	184	233
HGLibA_00340	ACAA1	67	63	28	44	4	19	123	120
HGLibA_00341	ACAA1	91	106	7	81	54	22	122	107
HGLibA_00342	ACAA1	155	102	225	115	33	156	494	483
HGLibA_00343	ACAA2	32	13	49	34	6	55	141	62
HGLibA_00344	ACAA2	41	25	74	20	6	39	234	181
HGLibA_00345	ACAA2	74	16	43	54	11	88	164	107
HGLibA_00346	ACACA	117	74	144	132	25	86	414	271
HGLibA_00347	ACACA	35	28	55	62	6	97	304	356
HGLibA_00348	ACACA	33	22	35	37	7	34	83	99
HGLibA_00349	ACACB	43	134	34	80	18	25	72	57
HGLibA_00350	ACACB	60	59	28	57	33	49	234	109
HGLibA_00351	ACACB	218	270	134	238	214	106	217	237
HGLibA_00352	ACAD10	34	82	56	45	14	45	191	196
HGLibA_00353	ACAD10	58	25	49	54	26	22	159	114
HGLibA_00354	ACAD10	50	17	135	34	4	90	188	156
HGLibA_00355	ACAD11	112	91	85	106	74	119	234	211
HGLibA_00356	ACAD11	40	37	23	74	6	59	136	116
HGLibA_00357	ACAD11	162	96	187	126	43	207	452	425
HGLibA_00358	ACAD8	144	101	109	124	46	98	155	142
HGLibA_00359	ACAD8	57	50	26	78	8	59	151	105
HGLibA_00360	ACAD8	34	47	32	45	34	35	223	77
HGLibA_00361	ACAD9	214	154	328	196	44	164	436	332
HGLibA_00362	ACAD9	105	68	212	148	18	50	272	231
HGLibA_00363	ACAD9	50	89	30	39	31	67	28	60
HGLibA_00364	ACADL	161	156	158	148	34	103	326	213
HGLibA_00365	ACADL	21	77	47	69	7	52	127	67
HGLibA_00366	ACADL	69	79	35	70	20	95	100	77
HGLibA_00367	ACADM	110	57	105	68	44	47	189	90
HGLibA_00368	ACADM	33	35	29	8	3	45	69	83
HGLibA_00369	ACADM	86	55	210	67	10	140	381	297
HGLibA_00370	ACADS	135	57	72	74	48	61	215	159
HGLibA_00371	ACADS	150	177	180	197	23	207	351	331
HGLibA_00372	ACADS	277	213	179	189	71	192	493	316
HGLibA_00373	ACADSB	131	115	104	65	51	66	299	257
HGLibA_00374	ACADSB	109	133	82	152	19	78	194	226
HGLibA_00375	ACADSB	82	51	99	46	8	33	102	80
HGLibA_00376	ACADVL	13	12	12	22	5	34	54	45
HGLibA_00377	ACADVL	21	8	72	26	0	44	59	75
HGLibA_00378	ACADVL	48	50	26	58	46	45	115	103
HGLibA_00379	ACAN	166	188	148	117	96	133	220	213
HGLibA_00380	ACAN	126	62	176	77	9	73	242	117
HGLibA_00381	ACAN	152	28	219	89	28	14	205	118
HGLibA_00382	ACAP1	404	282	225	262	127	271	576	452
HGLibA_00383	ACAP1	68	65	43	93	9	61	92	101
HGLibA_00384	ACAP1	65	64	65	51	18	104	206	293
HGLibA_00385	ACAP2	308	133	208	197	145	163	412	307
HGLibA_00386	ACAP2	36	12	56	12	21	9	47	38
HGLibA_00387	ACAP2	256	181	236	171	70	237	386	462
HGLibA_00388	ACAP3	118	41	96	78	32	21	133	133
HGLibA_00389	ACAP3	321	165	223	230	108	217	664	472
HGLibA_00390	ACAP3	184	59	193	64	38	52	328	308
HGLibA_00391	ACAT1	105	157	144	158	114	87	303	256
HGLibA_00392	ACAT1	129	95	148	68	25	66	411	263
HGLibA_00393	ACAT1	246	187	181	228	136	168	301	360
HGLibA_00394	ACAT2	77	132	121	119	21	128	231	202
HGLibA_00395	ACAT2	162	222	80	94	292	213	261	192
HGLibA_00396	ACAT2	332	224	358	274	108	257	549	329
HGLibA_00397	ACBD3	63	24	76	19	7	45	132	126
HGLibA_00398	ACBD3	23	26	14	8	4	31	43	43
HGLibA_00399	ACBD3	91	81	52	89	40	78	129	104
HGLibA_00400	ACBD4	43	53	51	75	4	71	211	165
HGLibA_00401	ACBD4	26	7	33	21	17	25	119	103
HGLibA_00402	ACBD4	108	89	57	114	72	78	171	99
HGLibA_00403	ACBD5	157	102	107	81	17	172	240	236
HGLibA_00404	ACBD5	323	255	238	319	58	213	424	307
HGLibA_00405	ACBD5	56	22	123	68	14	56	199	140
HGLibA_00406	ACBD6	118	25	135	6	27	23	142	67
HGLibA_00407	ACBD6	0	59	25	15	8	4	55	47
HGLibA_00408	ACBD6	5	19	8	0	2	11	41	22
HGLibA_00409	ACBD7	109	42	116	93	25	123	209	225
HGLibA_00410	ACBD7	147	158	190	126	15	164	425	414
HGLibA_00411	ACBD7	39	27	86	75	11	101	302	226
HGLibA_00412	ACCS	50	10	43	34	11	51	110	51
HGLibA_00413	ACCS	368	172	159	153	117	156	333	245
HGLibA_00414	ACCS	108	107	101	147	29	50	187	162
HGLibA_00415	ACCSL	135	73	72	86	55	93	257	283
HGLibA_00416	ACCSL	59	38	94	75	5	76	198	139
HGLibA_00417	ACCSL	27	12	26	13	35	19	64	30
HGLibA_00418	ACD	59	100	41	65	43	28	91	55
HGLibA_00419	ACD	120	99	155	70	51	98	148	275
HGLibA_00420	ACD	53	103	48	60	18	84	103	132
HGLibA_00421	ACE	64	32	48	65	17	26	107	74
HGLibA_00422	ACE	180	147	181	126	37	144	254	295
HGLibA_00423	ACE	100	39	133	57	12	50	209	198
HGLibA_00424	ACE2	80	37	79	76	9	102	130	121
HGLibA_00425	ACE2	216	164	74	207	172	150	316	297
HGLibA_00426	ACE2	234	198	180	161	102	145	391	315
HGLibA_00427	ACER1	209	268	89	174	111	219	302	233
HGLibA_00428	ACER1	123	56	56	120	23	47	177	182
HGLibA_00429	ACER1	215	60	117	175	35	59	369	245
HGLibA_00430	ACER2	152	133	137	159	65	136	272	193
HGLibA_00431	ACER2	36	4	31	0	16	12	31	37
HGLibA_00432	ACER2	92	68	138	85	24	129	337	355
HGLibA_00433	ACER3	110	100	76	135	12	83	199	248
HGLibA_00434	ACER3	36	32	129	87	4	87	248	195
HGLibA_00435	ACER3	68	18	65	74	8	156	227	205
HGLibA_00436	ACHE	159	224	71	176	123	107	194	212
HGLibA_00437	ACHE	137	57	68	98	52	62	94	103
HGLibA_00438	ACHE	121	101	65	161	31	88	189	192
HGLibA_00439	ACIN1	158	145	116	129	62	150	347	302
HGLibA_00440	ACIN1	69	46	56	63	30	43	115	89
HGLibA_00441	ACIN1	89	79	86	97	36	93	365	198
HGLibA_00442	ACKR2	356	333	300	300	177	298	542	564
HGLibA_00443	ACKR2	338	242	179	235	114	231	490	410
HGLibA_00444	ACKR2	408	352	220	186	400	178	364	264
HGLibA_00445	ACKR3	490	389	300	376	375	291	759	591
HGLibA_00446	ACKR3	425	400	108	379	221	227	53	51
HGLibA_00447	ACKR3	192	281	99	249	69	156	148	162
HGLibA_00448	ACKR4	93	66	200	45	31	92	227	147
HGLibA_00449	ACKR4	92	76	117	38	15	124	218	293
HGLibA_00450	ACKR4	112	74	94	117	16	63	276	165
HGLibA_00451	ACLY	35	17	45	27	3	25	138	209
HGLibA_00452	ACLY	57	29	52	37	12	117	207	134
HGLibA_00453	ACLY	161	232	122	250	181	179	294	191
HGLibA_00454	ACMSD	136	159	82	122	74	107	322	199
HGLibA_00455	ACMSD	187	194	80	203	91	81	252	175
HGLibA_00456	ACMSD	106	70	116	92	36	63	162	127
HGLibA_00457	ACN9	118	86	93	71	60	68	197	191
HGLibA_00458	ACN9	150	131	44	59	161	53	203	137
HGLibA_00459	ACN9	84	45	80	39	59	43	131	57
HGLibA_00460	ACO1	126	128	91	130	114	58	173	180
HGLibA_00461	ACO1	69	19	59	44	14	44	74	69
HGLibA_00462	ACO1	441	349	222	369	384	210	397	311
HGLibA_00463	ACO2	77	38	93	27	26	34	173	141
HGLibA_00464	ACO2	82	29	165	21	10	11	261	153
HGLibA_00465	ACO2	13	8	21	6	1	3	112	109
HGLibA_00466	ACOT1	164	161	113	150	203	80	265	256
HGLibA_00467	ACOT1	240	277	184	237	119	231	412	387
HGLibA_00468	ACOT1	80	57	110	67	21	32	207	128
HGLibA_00469	ACOT11	178	76	179	101	30	97	268	210
HGLibA_00470	ACOT11	91	124	39	121	28	121	139	189
HGLibA_00471	ACOT11	76	93	32	87	64	101	119	88
HGLibA_00472	ACOT12	50	32	44	29	13	30	119	81
HGLibA_00473	ACOT12	14	17	26	11	1	14	29	55
HGLibA_00474	ACOT12	32	35	21	18	22	35	86	49
HGLibA_00475	ACOT13	19	32	31	12	10	29	74	50
HGLibA_00476	ACOT13	80	37	90	82	32	48	156	93
HGLibA_00477	ACOT13	48	23	50	25	10	111	200	155
HGLibA_00478	ACOT2	58	29	18	64	13	49	82	74
HGLibA_00479	ACOT2	61	40	107	94	8	62	206	136
HGLibA_00480	ACOT2	136	108	159	94	16	111	285	215
HGLibA_00481	ACOT4	18	19	57	15	15	21	83	47
HGLibA_00482	ACOT4	74	47	46	104	28	44	69	40
HGLibA_00483	ACOT4	14	49	6	36	5	51	24	33
HGLibA_00484	ACOT6	230	175	288	167	55	207	490	497
HGLibA_00485	ACOT6	56	57	83	51	25	115	160	222
HGLibA_00486	ACOT6	54	52	62	39	20	22	93	126
HGLibA_00487	ACOT7	174	95	96	35	83	52	154	87
HGLibA_00488	ACOT7	183	100	223	98	31	92	278	204
HGLibA_00489	ACOT7	267	258	161	260	143	174	538	396
HGLibA_00490	ACOT8	45	71	31	75	24	74	182	90
HGLibA_00491	ACOT8	98	48	111	40	25	98	63	83
HGLibA_00492	ACOT8	305	335	244	304	206	127	511	504
HGLibA_00493	ACOT9	106	67	181	83	16	125	296	225
HGLibA_00494	ACOT9	14	5	11	13	0	39	45	55
HGLibA_00495	ACOT9	179	157	137	55	45	83	220	259
HGLibA_00496	ACOX1	157	87	127	86	24	102	229	154
HGLibA_00497	ACOX1	54	55	96	25	12	55	114	126
HGLibA_00498	ACOX1	27	11	13	44	6	34	109	59
HGLibA_00499	ACOX2	31	30	28	31	13	86	184	170
HGLibA_00500	ACOX2	80	59	132	70	22	63	314	240
HGLibA_00501	ACOX2	159	107	87	200	83	145	207	168
HGLibA_00502	ACOX3	124	120	99	70	27	58	169	220
HGLibA_00503	ACOX3	98	96	107	112	24	135	242	129
HGLibA_00504	ACOX3	15	11	56	4	4	33	26	51
HGLibA_00505	ACOXL	102	76	116	53	11	61	152	129
HGLibA_00506	ACOXL	96	81	49	111	42	67	313	176
HGLibA_00507	ACOXL	71	75	193	85	36	186	340	329
HGLibA_00508	ACP1	67	75	28	80	11	36	79	108
HGLibA_00509	ACP1	39	43	70	34	33	71	170	144
HGLibA_00510	ACP1	36	37	73	85	7	68	215	168
HGLibA_00511	ACP2	206	133	214	102	66	76	339	219
HGLibA_00512	ACP2	114	208	67	213	18	125	177	222
HGLibA_00513	ACP2	33	24	35	9	8	42	53	42
HGLibA_00514	ACP5	85	30	49	16	8	24	104	87
HGLibA_00515	ACP5	67	72	64	111	8	45	142	145
HGLibA_00516	ACP5	25	58	30	111	36	76	184	131
HGLibA_00517	ACP6	180	119	155	140	39	142	258	282
HGLibA_00518	ACP6	140	104	196	117	34	80	221	201
HGLibA_00519	ACP6	141	97	103	150	13	117	291	278
HGLibA_00520	ACPL2	61	32	60	31	24	32	94	86
HGLibA_00521	ACPL2	121	158	73	123	36	106	224	191
HGLibA_00522	ACPL2	90	45	86	58	14	103	205	159
HGLibA_00523	ACPP	97	107	71	111	25	167	263	178
HGLibA_00524	ACPP	33	21	27	18	5	32	36	25
HGLibA_00525	ACPP	379	219	437	251	125	177	521	460
HGLibA_00526	ACPT	137	91	76	126	14	138	233	160
HGLibA_00527	ACPT	40	17	39	39	18	61	87	103
HGLibA_00528	ACPT	73	113	73	74	93	58	122	119
HGLibA_00529	ACR	52	58	6	62	29	51	122	183
HGLibA_00530	ACR	120	178	37	82	67	87	336	203
HGLibA_00531	ACR	75	49	140	87	9	178	241	246
HGLibA_00532	ACRBP	109	147	104	168	4	179	255	219
HGLibA_00533	ACRBP	200	54	151	92	71	47	246	185
HGLibA_00534	ACRBP	33	40	22	46	11	44	61	48
HGLibA_00535	ACRC	199	79	192	117	44	161	282	284
HGLibA_00536	ACRC	48	25	6	23	32	2	28	31
HGLibA_00537	ACRC	215	221	145	177	69	183	309	341
HGLibA_00538	ACRV1	70	63	112	79	16	78	154	188
HGLibA_00539	ACRV1	257	60	168	141	128	42	229	209
HGLibA_00540	ACRV1	203	149	133	111	66	113	236	268
HGLibA_00541	ACSBG1	155	53	133	23	94	62	87	126
HGLibA_00542	ACSBG1	201	91	115	145	81	185	408	243
HGLibA_00543	ACSBG1	266	203	240	168	102	128	417	313
HGLibA_00544	ACSBG2	194	72	182	78	104	67	275	248
HGLibA_00545	ACSBG2	237	175	224	178	64	247	445	452
HGLibA_00546	ACSBG2	31	12	24	25	4	53	109	98
HGLibA_00547	ACSF2	73	25	50	44	9	32	124	70
HGLibA_00548	ACSF2	136	124	263	250	66	151	316	248
HGLibA_00549	ACSF2	54	47	11	62	21	96	36	57
HGLibA_00550	ACSF3	98	150	62	77	21	62	194	138
HGLibA_00551	ACSF3	80	99	134	88	34	110	245	278
HGLibA_00552	ACSF3	76	77	57	105	29	143	136	144
HGLibA_00553	ACSL1	298	208	213	190	95	165	361	325
HGLibA_00554	ACSL1	259	351	221	325	142	155	317	261
HGLibA_00555	ACSL1	247	134	149	251	90	202	203	244
HGLibA_00556	ACSL3	66	113	53	100	46	48	93	152
HGLibA_00557	ACSL3	113	30	37	26	51	41	152	93
HGLibA_00558	ACSL3	84	87	98	68	28	65	232	235
HGLibA_00559	ACSL4	25	33	44	42	4	66	132	127
HGLibA_00560	ACSL4	94	62	154	91	40	66	210	221
HGLibA_00561	ACSL4	91	42	131	96	15	149	198	225
HGLibA_00562	ACSL5	224	275	196	204	129	198	440	367
HGLibA_00563	ACSL5	28	11	12	37	98	9	66	64
HGLibA_00564	ACSL5	170	239	140	158	42	162	366	308
HGLibA_00565	ACSL6	88	142	88	110	34	110	207	163
HGLibA_00566	ACSL6	113	68	153	40	33	30	150	128
HGLibA_00567	ACSL6	84	89	43	144	21	126	246	205
HGLibA_00568	ACSM1	331	157	155	229	151	154	415	373
HGLibA_00569	ACSM1	74	96	53	120	20	110	261	241
HGLibA_00570	ACSM1	32	19	14	11	15	3	104	66
HGLibA_00571	ACSM2A	132	192	161	177	70	143	208	233
HGLibA_00572	ACSM2A	109	98	170	111	31	100	278	229
HGLibA_00573	ACSM2A	166	171	183	117	43	122	311	300
HGLibA_00574	ACSM2B	97	135	175	104	36	160	249	237
HGLibA_00575	ACSM2B	180	141	162	172	48	100	361	334
HGLibA_00576	ACSM2B	107	89	114	128	11	74	194	131
HGLibA_00577	ACSM3	183	67	173	74	192	35	221	232
HGLibA_00578	ACSM3	79	145	11	188	11	85	153	178
HGLibA_00579	ACSM3	136	174	163	173	67	162	372	318
HGLibA_00580	ACSM4	41	37	54	30	15	31	103	73
HGLibA_00581	ACSM4	157	117	114	198	31	152	258	228
HGLibA_00582	ACSM4	190	144	118	295	61	180	299	259
HGLibA_00583	ACSM5	50	155	32	131	68	101	136	168
HGLibA_00584	ACSM5	134	86	89	70	24	116	385	266
HGLibA_00585	ACSM5	87	62	67	62	59	40	95	82
HGLibA_00586	ACSS1	125	75	121	66	28	94	243	179
HGLibA_00587	ACSS1	43	44	92	71	3	82	119	196
HGLibA_00588	ACSS1	33	25	34	43	34	40	52	94
HGLibA_00589	ACSS2	170	45	211	156	20	167	329	334
HGLibA_00590	ACSS2	193	206	222	176	40	164	491	408
HGLibA_00591	ACSS2	61	91	99	52	21	127	157	173
HGLibA_00592	ACSS3	153	166	109	123	71	82	225	231
HGLibA_00593	ACSS3	33	6	21	12	7	17	63	88
HGLibA_00594	ACSS3	0	26	0	15	0	27	16	40
HGLibA_00595	ACTA1	404	208	222	420	168	309	519	440
HGLibA_00596	ACTA1	332	268	253	349	85	177	344	458
HGLibA_00597	ACTA1	243	189	104	176	161	129	224	130
HGLibA_00598	ACTA2	220	109	215	226	62	121	235	268
HGLibA_00599	ACTA2	76	33	68	35	23	103	154	152
HGLibA_00600	ACTA2	16	39	56	26	0	51	97	45
HGLibA_00601	ACTB	29	22	37	53	22	34	57	76
HGLibA_00602	ACTB	41	24	46	50	1	9	72	65
HGLibA_00603	ACTB	339	279	291	212	101	166	484	469
HGLibA_00604	ACTBL2	150	80	72	126	58	95	144	175
HGLibA_00605	ACTBL2	108	92	195	131	15	136	308	197
HGLibA_00606	ACTBL2	440	396	248	282	184	214	463	349
HGLibA_00607	ACTC1	118	102	77	264	26	92	189	154
HGLibA_00608	ACTC1	5	23	10	13	9	33	44	43
HGLibA_00609	ACTC1	82	26	33	132	53	26	151	61
HGLibA_00610	ACTG1	180	133	123	114	52	102	309	204
HGLibA_00611	ACTG1	359	162	213	179	167	173	355	333
HGLibA_00612	ACTG1	42	15	8	19	4	8	55	42
HGLibA_00613	ACTG2	235	199	153	185	65	236	405	423
HGLibA_00614	ACTG2	191	92	124	177	138	47	145	162
HGLibA_00615	ACTG2	171	114	134	150	58	74	211	204
HGLibA_00616	ACTL10	163	32	118	114	47	40	210	219
HGLibA_00617	ACTL10	8	46	41	32	2	19	23	43
HGLibA_00618	ACTL10	188	254	151	227	146	81	313	333
HGLibA_00619	ACTL6A	73	12	50	31	6	13	170	119
HGLibA_00620	ACTL6A	74	27	22	57	14	47	309	213
HGLibA_00621	ACTL6A	210	159	221	341	35	181	534	392
HGLibA_00622	ACTL6B	44	24	157	33	8	41	217	121
HGLibA_00623	ACTL6B	262	243	215	180	99	255	517	514
HGLibA_00624	ACTL6B	92	76	75	93	30	115	291	194
HGLibA_00625	ACTL7A	205	361	127	295	247	98	246	229
HGLibA_00626	ACTL7A	283	169	241	178	47	204	364	294
HGLibA_00627	ACTL7A	176	171	45	119	49	152	306	176
HGLibA_00628	ACTL7B	65	59	48	78	36	33	69	56
HGLibA_00629	ACTL7B	79	101	83	140	40	93	286	251
HGLibA_00630	ACTL7B	189	132	77	95	135	107	181	123
HGLibA_00631	ACTL8	104	84	47	41	60	49	202	122
HGLibA_00632	ACTL8	85	64	62	101	31	117	224	222
HGLibA_00633	ACTL8	21	14	39	8	5	11	13	14
HGLibA_00634	ACTL9	108	56	27	98	34	67	107	193
HGLibA_00635	ACTL9	9	45	12	25	10	12	66	24
HGLibA_00636	ACTL9	27	57	78	13	0	17	41	46
HGLibA_00637	ACTN1	76	101	110	72	47	143	219	242
HGLibA_00638	ACTN1	259	131	177	128	46	153	352	478
HGLibA_00639	ACTN1	54	9	22	21	15	19	99	77
HGLibA_00640	ACTN2	68	64	60	62	15	60	183	105
HGLibA_00641	ACTN2	20	35	42	34	50	64	97	74
HGLibA_00642	ACTN2	244	140	125	194	35	220	458	403
HGLibA_00643	ACTN4	196	201	186	192	30	171	349	345
HGLibA_00644	ACTN4	38	36	39	69	23	62	178	101
HGLibA_00645	ACTN4	10	10	11	10	3	28	51	30
HGLibA_00646	ACTR10	18	11	33	28	1	39	91	106
HGLibA_00647	ACTR10	88	122	98	155	15	180	322	323
HGLibA_00648	ACTR10	2	2	14	2	0	7	32	27
HGLibA_00649	ACTR1A	84	46	74	89	31	121	397	346
HGLibA_00650	ACTR1A	132	129	47	95	78	50	166	156
HGLibA_00651	ACTR1A	173	152	98	101	118	126	261	183
HGLibA_00652	ACTR1B	49	11	13	32	5	8	89	33
HGLibA_00653	ACTR1B	77	99	59	79	36	87	172	130
HGLibA_00654	ACTR1B	11	58	9	49	2	12	49	29
HGLibA_00655	ACTR2	7	0	36	2	0	4	103	58
HGLibA_00656	ACTR2	163	52	265	170	39	77	375	321
HGLibA_00657	ACTR2	14	6	45	19	1	2	172	94
HGLibA_00658	ACTR3	112	40	124	88	32	19	126	125
HGLibA_00659	ACTR3	116	65	196	117	43	107	269	322
HGLibA_00660	ACTR3	71	54	155	91	15	76	239	181
HGLibA_00661	ACTR3B	239	105	135	170	55	47	308	205
HGLibA_00662	ACTR3B	119	88	286	148	22	151	304	226
HGLibA_00663	ACTR3B	259	321	179	211	199	188	510	312
HGLibA_00664	ACTR3C	171	60	177	138	51	159	303	220
HGLibA_00665	ACTR3C	227	178	185	255	104	250	465	284
HGLibA_00666	ACTR3C	185	168	55	115	38	56	175	137
HGLibA_00667	ACTR5	152	141	75	48	84	113	400	356
HGLibA_00668	ACTR5	174	110	98	173	53	195	372	281
HGLibA_00669	ACTR5	61	17	54	46	28	47	121	157
HGLibA_00670	ACTR6	32	18	109	16	9	37	160	111
HGLibA_00671	ACTR6	27	57	8	49	13	20	267	196
HGLibA_00672	ACTR6	81	38	180	57	23	173	434	279
HGLibA_00673	ACTR8	208	113	57	91	67	36	119	103
HGLibA_00674	ACTR8	229	113	113	163	51	45	209	224
HGLibA_00675	ACTR8	26	34	24	40	9	31	233	144
HGLibA_00676	ACTRT1	121	95	38	47	10	85	126	65
HGLibA_00677	ACTRT1	36	11	80	14	1	52	113	119
HGLibA_00678	ACTRT1	135	91	127	113	44	145	264	262
HGLibA_00679	ACTRT2	22	7	5	23	2	26	45	26
HGLibA_00680	ACTRT2	154	114	162	105	29	122	179	229
HGLibA_00681	ACTRT2	162	122	138	129	67	35	260	227
HGLibA_00682	ACTRT3	146	242	111	204	84	68	274	283
HGLibA_00683	ACTRT3	3	8	38	9	5	31	55	39
HGLibA_00684	ACTRT3	40	51	63	80	16	20	256	186
HGLibA_00685	ACVR1	261	204	199	182	85	166	458	289
HGLibA_00686	ACVR1	70	72	63	68	9	150	274	303
HGLibA_00687	ACVR1	120	73	191	57	16	40	258	241
HGLibA_00688	ACVR1B	224	403	145	228	214	187	327	293
HGLibA_00689	ACVR1B	179	186	126	127	103	112	233	304
HGLibA_00690	ACVR1B	64	11	11	7	23	47	50	19
HGLibA_00691	ACVR1C	89	71	40	123	51	117	144	94
HGLibA_00692	ACVR1C	393	230	181	313	87	203	706	456
HGLibA_00693	ACVR1C	167	109	156	87	111	50	264	205
HGLibA_00694	ACVR2A	142	151	136	96	29	201	429	420
HGLibA_00695	ACVR2A	148	60	198	82	23	104	238	237
HGLibA_00696	ACVR2A	91	66	137	59	29	150	314	240
HGLibA_00697	ACVR2B	4	19	28	23	0	50	13	30
HGLibA_00698	ACVR2B	253	93	161	106	73	58	337	232
HGLibA_00699	ACVR2B	273	208	139	174	109	119	286	257
HGLibA_00700	ACVRL1	129	68	96	122	53	90	197	172
HGLibA_00701	ACVRL1	240	200	161	185	144	183	366	366
HGLibA_00702	ACVRL1	66	101	118	97	18	186	356	204
HGLibA_00703	ACY1	69	75	18	81	50	16	109	115
HGLibA_00704	ACY1	19	75	13	72	0	41	123	71
HGLibA_00705	ACY1	74	38	79	37	12	30	83	92
HGLibA_00706	ACY3	81	45	81	62	43	42	113	103
HGLibA_00707	ACY3	69	44	64	113	7	112	208	125
HGLibA_00708	ACY3	65	71	72	58	29	59	143	105
HGLibA_00709	ACYP1	64	161	71	180	35	192	258	220
HGLibA_00710	ACYP1	117	57	137	54	27	189	368	246
HGLibA_00711	ACYP1	126	66	157	69	19	103	238	222
HGLibA_00712	ACYP2	116	68	65	115	29	82	312	260
HGLibA_00713	ACYP2	28	55	34	23	21	65	138	142
HGLibA_00714	ACYP2	12	7	97	16	4	55	58	53
HGLibA_00715	ADA	132	85	117	103	19	54	349	208
HGLibA_00716	ADA	159	210	115	226	56	181	389	314
HGLibA_00717	ADA	50	42	40	25	27	32	149	109
HGLibA_00718	ADAD1	234	155	131	130	57	148	454	251
HGLibA_00719	ADAD1	104	41	103	8	8	37	122	81
HGLibA_00720	ADAD1	8	8	28	24	2	17	57	39
HGLibA_00721	ADAD2	121	106	99	71	25	59	98	47
HGLibA_00722	ADAD2	204	152	63	197	60	143	162	223
HGLibA_00723	ADAD2	119	48	64	78	45	49	185	136
HGLibA_00724	ADAL	168	148	90	109	50	107	302	245
HGLibA_00725	ADAL	87	83	91	132	33	71	355	298
HGLibA_00726	ADAL	16	21	44	1	5	28	142	61
HGLibA_00727	ADAM10	34	28	6	22	8	7	50	48
HGLibA_00728	ADAM10	29	15	43	17	8	28	132	75
HGLibA_00729	ADAM10	86	66	129	71	38	25	205	141
HGLibA_00730	ADAM11	141	229	102	204	67	127	284	269
HGLibA_00731	ADAM11	93	82	55	86	75	111	191	118
HGLibA_00732	ADAM11	44	84	47	80	12	48	178	127
HGLibA_00733	ADAM12	148	161	102	112	28	96	323	313
HGLibA_00734	ADAM12	159	196	144	156	96	117	173	247
HGLibA_00735	ADAM12	36	28	91	80	6	70	142	118
HGLibA_00736	ADAM15	74	45	77	33	21	39	168	129
HGLibA_00737	ADAM15	59	79	55	53	13	56	106	79
HGLibA_00738	ADAM15	82	192	66	161	52	140	218	208
HGLibA_00739	ADAM17	231	129	154	166	85	136	332	186
HGLibA_00740	ADAM17	44	58	101	91	14	54	220	121
HGLibA_00741	ADAM17	290	256	208	249	67	146	523	366
HGLibA_00742	ADAM18	129	66	130	119	30	178	300	275
HGLibA_00743	ADAM18	205	128	182	156	44	173	203	280
HGLibA_00744	ADAM18	83	72	119	146	36	97	289	229
HGLibA_00745	ADAM19	145	105	133	129	59	82	235	212
HGLibA_00746	ADAM19	102	160	140	138	51	136	258	228
HGLibA_00747	ADAM19	6	7	4	1	7	3	27	5
HGLibA_00748	ADAM2	30	37	38	19	2	22	117	61
HGLibA_00749	ADAM2	88	51	90	65	16	65	171	187
HGLibA_00750	ADAM2	7	7	26	7	1	28	53	62
HGLibA_00751	ADAM20	73	48	71	52	10	108	210	191
HGLibA_00752	ADAM20	106	117	129	102	50	47	92	141
HGLibA_00753	ADAM20	141	77	69	88	72	49	225	83
HGLibA_00754	ADAM21	48	25	44	52	20	26	121	91
HGLibA_00755	ADAM21	149	123	215	153	43	169	304	220
HGLibA_00756	ADAM21	12	10	19	20	2	26	59	68
HGLibA_00757	ADAM22	85	71	135	50	26	124	190	146
HGLibA_00758	ADAM22	61	36	100	67	13	58	235	175
HGLibA_00759	ADAM22	187	135	112	155	87	171	259	282
HGLibA_00760	ADAM23	43	23	63	29	11	30	107	89
HGLibA_00761	ADAM23	37	28	58	23	10	46	120	85
HGLibA_00762	ADAM23	149	210	107	171	40	81	317	326
HGLibA_00763	ADAM28	53	56	50	83	11	92	141	134
HGLibA_00764	ADAM28	89	69	54	49	24	15	180	136
HGLibA_00765	ADAM28	59	48	64	93	21	121	157	208
HGLibA_00766	ADAM29	94	65	65	68	33	44	141	79
HGLibA_00767	ADAM29	104	75	160	102	31	122	284	205
HGLibA_00768	ADAM29	49	16	114	49	15	23	163	75
HGLibA_00769	ADAM30	61	30	141	8	0	30	151	168
HGLibA_00770	ADAM30	10	24	38	37	0	79	234	202
HGLibA_00771	ADAM30	286	221	429	204	98	308	447	425
HGLibA_00772	ADAM32	187	155	101	182	109	198	270	386
HGLibA_00773	ADAM32	640	416	371	345	342	360	840	666
HGLibA_00774	ADAM32	102	52	165	108	11	164	363	319
HGLibA_00775	ADAM33	233	216	38	133	144	213	293	274
HGLibA_00776	ADAM33	227	161	222	113	48	73	429	267
HGLibA_00777	ADAM33	20	15	17	19	2	31	113	73
HGLibA_00778	ADAM7	79	107	69	85	17	68	154	188
HGLibA_00779	ADAM7	111	97	136	87	28	185	359	283
HGLibA_00780	ADAM7	46	33	41	24	8	31	117	113
HGLibA_00781	ADAM8	36	28	24	57	7	87	137	185
HGLibA_00782	ADAM8	193	74	86	88	75	34	63	107
HGLibA_00783	ADAM8	62	119	42	94	43	61	102	149
HGLibA_00784	ADAM9	19	15	2	29	3	11	35	33
HGLibA_00785	ADAM9	66	54	72	125	20	186	298	305
HGLibA_00786	ADAM9	8	7	86	14	1	18	184	117
HGLibA_00787	ADAMDEC1	108	136	132	98	84	95	137	127
HGLibA_00788	ADAMDEC1	76	49	134	37	14	55	139	70
HGLibA_00789	ADAMDEC1	222	188	98	143	96	168	243	180
HGLibA_00790	ADAMTS1	234	150	115	214	110	160	278	212
HGLibA_00791	ADAMTS1	328	178	220	254	204	112	346	260
HGLibA_00792	ADAMTS1	121	48	179	59	33	73	195	178
HGLibA_00793	ADAMTS10	133	157	113	155	70	44	270	206
HGLibA_00794	ADAMTS10	112	103	105	73	25	100	253	258
HGLibA_00795	ADAMTS10	66	104	145	141	44	120	212	199
HGLibA_00796	ADAMTS12	45	17	20	13	39	42	92	50
HGLibA_00797	ADAMTS12	138	64	196	106	56	130	246	193
HGLibA_00798	ADAMTS12	75	26	263	91	13	90	279	209
HGLibA_00799	ADAMTS13	142	108	140	170	52	85	372	315
HGLibA_00800	ADAMTS13	310	247	236	155	198	157	563	407
HGLibA_00801	ADAMTS13	119	114	154	178	32	131	224	225
HGLibA_00802	ADAMTS14	183	112	255	134	64	126	311	189
HGLibA_00803	ADAMTS14	83	46	145	45	13	53	177	174
HGLibA_00804	ADAMTS14	38	43	43	22	24	41	74	71
HGLibA_00805	ADAMTS15	29	43	42	50	2	41	92	71
HGLibA_00806	ADAMTS15	159	222	103	206	115	143	215	206
HGLibA_00807	ADAMTS15	8	11	7	2	13	0	36	11
HGLibA_00808	ADAMTS16	51	23	77	26	49	13	135	79
HGLibA_00809	ADAMTS16	198	270	167	181	111	139	434	393
HGLibA_00810	ADAMTS16	63	112	100	101	12	166	237	227
HGLibA_00811	ADAMTS17	109	62	52	90	52	57	153	173
HGLibA_00812	ADAMTS17	559	186	388	306	184	257	688	532
HGLibA_00813	ADAMTS17	0	29	0	10	1	2	0	19
HGLibA_00814	ADAMTS18	53	55	32	80	15	69	151	116
HGLibA_00815	ADAMTS18	83	62	125	119	10	130	270	266
HGLibA_00816	ADAMTS18	48	9	73	17	15	18	105	67
HGLibA_00817	ADAMTS19	192	280	122	208	85	123	242	326
HGLibA_00818	ADAMTS19	220	237	210	210	54	276	494	366
HGLibA_00819	ADAMTS19	99	50	114	84	23	43	169	219
HGLibA_00820	ADAMTS2	114	54	131	52	20	88	157	134
HGLibA_00821	ADAMTS2	154	78	46	130	38	109	331	222
HGLibA_00822	ADAMTS2	161	147	14	115	73	74	216	164
HGLibA_00823	ADAMTS20	297	227	162	189	213	101	394	398
HGLibA_00824	ADAMTS20	21	15	2	4	6	16	52	58
HGLibA_00825	ADAMTS20	140	49	136	152	25	125	432	354
HGLibA_00826	ADAMTS3	43	32	56	84	30	57	180	151
HGLibA_00827	ADAMTS3	77	36	44	23	38	12	65	40
HGLibA_00828	ADAMTS3	155	70	174	132	20	141	249	199
HGLibA_00829	ADAMTS4	91	67	86	150	72	59	179	151
HGLibA_00830	ADAMTS4	326	219	220	168	225	104	332	263
HGLibA_00831	ADAMTS4	65	42	50	42	33	76	92	116
HGLibA_00832	ADAMTS5	60	66	47	52	12	110	68	96
HGLibA_00833	ADAMTS5	170	78	131	130	49	113	274	234
HGLibA_00834	ADAMTS5	142	129	92	138	31	125	196	239
HGLibA_00835	ADAMTS6	12	5	29	16	5	30	55	63
HGLibA_00836	ADAMTS6	7	7	43	6	1	8	60	30
HGLibA_00837	ADAMTS6	112	93	99	73	37	129	155	211
HGLibA_00838	ADAMTS7	77	46	61	24	74	16	91	78
HGLibA_00839	ADAMTS7	94	57	82	45	2	71	118	124
HGLibA_00840	ADAMTS7	22	5	20	7	19	3	4	0
HGLibA_00841	ADAMTS8	149	120	45	55	49	35	89	121
HGLibA_00842	ADAMTS8	250	224	273	220	67	243	570	463
HGLibA_00843	ADAMTS8	71	104	23	46	18	97	93	154
HGLibA_00844	ADAMTS9	82	17	47	42	9	65	144	95
HGLibA_00845	ADAMTS9	59	73	124	133	18	147	211	166
HGLibA_00846	ADAMTS9	318	291	175	225	380	193	389	302
HGLibA_00847	ADAMTSL1	197	375	129	325	104	98	368	287
HGLibA_00848	ADAMTSL1	76	135	71	47	15	78	89	151
HGLibA_00849	ADAMTSL1	81	86	114	113	40	65	139	123
HGLibA_00850	ADAMTSL2	141	95	131	122	31	97	184	191
HGLibA_00851	ADAMTSL2	249	245	267	269	101	162	358	264
HGLibA_00852	ADAMTSL2	153	75	54	55	41	52	214	113
HGLibA_00853	ADAMTSL3	57	14	37	11	17	41	98	99
HGLibA_00854	ADAMTSL3	2	18	1	8	0	23	23	17
HGLibA_00855	ADAMTSL3	81	84	72	72	75	51	257	161
HGLibA_00856	ADAMTSL4	82	119	119	97	48	113	246	240
HGLibA_00857	ADAMTSL4	13	1	12	15	6	10	43	31
HGLibA_00858	ADAMTSL4	100	165	92	146	93	56	206	167
HGLibA_00859	ADAMTSL5	26	75	27	58	13	71	147	91
HGLibA_00860	ADAMTSL5	19	37	0	19	5	17	31	37
HGLibA_00861	ADAMTSL5	36	30	75	72	12	59	183	118
HGLibA_00862	ADAP1	66	52	36	28	80	65	99	53
HGLibA_00863	ADAP1	403	402	335	388	140	431	863	754
HGLibA_00864	ADAP1	101	35	69	102	77	54	162	171
HGLibA_00865	ADAP2	25	18	24	24	8	46	84	74
HGLibA_00866	ADAP2	116	41	48	71	15	35	131	119
HGLibA_00867	ADAP2	29	17	47	25	11	25	138	148
HGLibA_00868	ADAR	87	100	97	104	22	74	307	250
HGLibA_00869	ADAR	192	72	222	127	86	59	367	294
HGLibA_00870	ADAR	107	59	107	113	9	114	252	169
HGLibA_00871	ADARB1	65	135	52	62	18	54	61	105
HGLibA_00872	ADARB1	109	77	74	76	67	84	143	131
HGLibA_00873	ADARB1	203	163	204	165	68	148	348	319
HGLibA_00874	ADARB2	3	18	37	31	5	33	17	56
HGLibA_00875	ADARB2	319	297	105	218	344	124	260	158
HGLibA_00876	ADARB2	122	150	38	112	74	101	225	257
HGLibA_00877	ADAT1	147	64	91	102	15	171	314	271
HGLibA_00878	ADAT1	67	92	112	99	20	158	176	205
HGLibA_00879	ADAT1	14	10	28	10	4	9	40	25
HGLibA_00880	ADAT2	86	98	92	73	29	61	172	116
HGLibA_00881	ADAT2	187	150	156	160	170	117	356	239
HGLibA_00882	ADAT2	142	36	38	33	83	73	123	115
HGLibA_00883	ADAT3	80	111	63	49	46	45	101	108
HGLibA_00884	ADAT3	68	48	71	59	62	63	157	103
HGLibA_00885	ADAT3	85	65	34	78	12	37	135	118
HGLibA_00886	ADC	115	95	93	109	74	55	284	166
HGLibA_00887	ADC	264	336	246	271	191	208	504	428
HGLibA_00888	ADC	57	25	31	70	6	14	106	86
HGLibA_00889	ADCK1	192	161	113	128	46	166	199	242
HGLibA_00890	ADCK1	81	30	69	40	13	58	220	181
HGLibA_00891	ADCK1	144	112	133	100	73	97	208	224
HGLibA_00892	ADCK2	146	100	85	44	44	58	158	151
HGLibA_00893	ADCK2	126	139	82	31	90	75	157	139
HGLibA_00894	ADCK2	333	232	265	218	91	256	590	421
HGLibA_00895	ADCK3	279	170	117	187	126	93	365	322
HGLibA_00896	ADCK3	66	34	117	57	9	77	196	115
HGLibA_00897	ADCK3	40	22	51	34	23	35	90	86
HGLibA_00898	ADCK4	55	29	94	45	10	40	270	152
HGLibA_00899	ADCK4	84	148	66	187	14	34	153	163
HGLibA_00900	ADCK4	67	28	106	33	6	175	249	191
HGLibA_00901	ADCK5	77	79	132	120	28	100	369	243
HGLibA_00902	ADCK5	164	229	114	187	76	133	310	251
HGLibA_00903	ADCK5	71	74	112	62	28	113	225	206
HGLibA_00904	ADCY1	83	76	73	81	47	64	232	172
HGLibA_00905	ADCY1	134	144	170	99	55	193	344	320
HGLibA_00906	ADCY1	45	12	74	64	10	16	97	150
HGLibA_00907	ADCY10	117	78	115	121	38	96	260	218
HGLibA_00908	ADCY10	43	16	69	31	35	19	131	136
HGLibA_00909	ADCY10	45	20	74	40	10	45	148	116
HGLibA_00910	ADCY2	185	176	137	127	71	148	258	250
HGLibA_00911	ADCY2	161	150	139	126	53	203	358	218
HGLibA_00912	ADCY2	22	53	16	45	8	72	144	147
HGLibA_00913	ADCY3	118	93	57	91	109	80	210	154
HGLibA_00914	ADCY3	194	94	48	123	39	144	294	267
HGLibA_00915	ADCY3	62	33	65	31	17	28	104	117
HGLibA_00916	ADCY4	55	56	62	40	3	10	89	38
HGLibA_00917	ADCY4	6	0	8	0	2	0	20	16
HGLibA_00918	ADCY4	159	145	162	149	24	145	266	203
HGLibA_00919	ADCY5	81	127	99	71	24	73	188	131
HGLibA_00920	ADCY5	118	87	131	35	45	87	274	250
HGLibA_00921	ADCY5	177	122	131	120	43	70	274	288
HGLibA_00922	ADCY6	178	153	83	172	96	49	310	224
HGLibA_00923	ADCY6	108	48	80	43	51	57	227	138
HGLibA_00924	ADCY6	72	50	36	9	39	54	96	95
HGLibA_00925	ADCY7	66	47	98	79	23	99	86	187
HGLibA_00926	ADCY7	35	38	12	88	9	19	65	59
HGLibA_00927	ADCY7	177	143	101	63	64	105	192	173
HGLibA_00928	ADCY8	373	194	179	217	196	140	468	302
HGLibA_00929	ADCY8	227	280	195	171	52	156	277	249
HGLibA_00930	ADCY8	61	70	169	91	17	75	91	106
HGLibA_00931	ADCY9	140	278	132	191	51	105	249	288
HGLibA_00932	ADCY9	376	392	236	387	275	232	452	437
HGLibA_00933	ADCY9	75	132	59	122	31	95	117	132
HGLibA_00934	ADCYAP1	29	75	27	51	8	49	83	71
HGLibA_00935	ADCYAP1	102	106	44	65	30	121	262	239
HGLibA_00936	ADCYAP1	103	52	70	39	11	71	186	170
HGLibA_00937	ADCYAP1R1	71	25	30	29	31	79	191	94
HGLibA_00938	ADCYAP1R1	23	34	17	11	10	35	66	66
HGLibA_00939	ADCYAP1R1	94	52	66	85	22	129	228	142
HGLibA_00940	ADD1	111	58	126	68	9	50	259	270
HGLibA_00941	ADD1	418	361	198	266	223	151	500	466
HGLibA_00942	ADD1	141	110	208	105	29	150	410	283
HGLibA_00943	ADD2	229	218	111	272	134	99	350	249
HGLibA_00944	ADD2	174	161	106	151	90	123	224	168
HGLibA_00945	ADD2	427	424	294	409	124	320	532	423
HGLibA_00946	ADD3	130	117	179	180	32	165	294	304
HGLibA_00947	ADD3	129	141	141	198	45	148	430	410
HGLibA_00948	ADD3	63	34	49	30	34	44	172	146
HGLibA_00949	ADH1A	59	115	59	163	13	104	245	211
HGLibA_00950	ADH1A	56	45	33	32	33	24	115	77
HGLibA_00951	ADH1A	144	131	86	168	82	115	382	364
HGLibA_00952	ADH1B	461	317	424	196	69	209	548	457
HGLibA_00953	ADH1B	230	217	176	132	161	89	332	259
HGLibA_00954	ADH1B	196	137	239	193	106	112	410	346
HGLibA_00955	ADH4	125	65	93	91	24	72	225	219
HGLibA_00956	ADH4	200	184	165	271	56	216	524	421
HGLibA_00957	ADH4	69	95	42	26	25	65	126	87
HGLibA_00958	ADH5	138	118	150	103	55	186	345	282
HGLibA_00959	ADH5	31	19	18	31	0	16	79	60
HGLibA_00960	ADH5	92	56	218	111	15	76	276	234
HGLibA_00961	ADH6	55	63	66	49	14	62	102	84
HGLibA_00962	ADH6	94	69	164	75	30	101	226	230
HGLibA_00963	ADH6	38	3	34	16	9	13	82	66
HGLibA_00964	ADH7	77	59	93	48	48	75	256	221
HGLibA_00965	ADH7	49	35	68	58	17	82	169	164
HGLibA_00966	ADH7	44	13	69	35	7	40	172	113
HGLibA_00967	ADHFE1	19	36	25	53	16	61	83	93
HGLibA_00968	ADHFE1	132	132	150	101	96	39	252	244
HGLibA_00969	ADHFE1	6	8	26	27	2	14	26	7
HGLibA_00970	ADI1	81	36	62	61	23	72	183	144
HGLibA_00971	ADI1	145	87	107	132	28	168	341	250
HGLibA_00972	ADI1	74	28	168	79	12	113	226	198
HGLibA_00973	ADIG	154	146	140	183	64	113	251	170
HGLibA_00974	ADIG	35	25	68	33	3	71	182	110
HGLibA_00975	ADIG	192	171	117	166	27	115	269	273
HGLibA_00976	ADIPOQ	81	47	103	70	12	93	161	118
HGLibA_00977	ADIPOQ	105	67	74	176	47	55	159	183
HGLibA_00978	ADIPOQ	152	153	91	78	29	202	327	289
HGLibA_00979	ADIPOR1	70	16	40	47	15	25	177	126
HGLibA_00980	ADIPOR1	154	137	79	136	42	113	203	158
HGLibA_00981	ADIPOR1	59	39	83	67	20	70	149	114
HGLibA_00982	ADIPOR2	147	140	144	131	53	63	188	173
HGLibA_00983	ADIPOR2	315	312	216	262	152	239	472	461
HGLibA_00984	ADIPOR2	130	122	114	87	45	109	211	169
HGLibA_00985	ADIRF	70	51	38	76	21	67	149	160
HGLibA_00986	ADIRF	200	176	75	192	93	136	221	212
HGLibA_00987	ADIRF	155	142	143	69	37	54	261	207
HGLibA_00988	ADK	78	147	103	104	41	67	161	199
HGLibA_00989	ADK	92	77	150	46	55	76	227	134
HGLibA_00990	ADK	45	39	49	17	24	11	152	94
HGLibA_00991	ADM	217	150	102	163	32	81	240	205
HGLibA_00992	ADM	418	284	255	296	195	231	483	419
HGLibA_00993	ADM	303	285	134	179	150	206	210	274
HGLibA_00994	ADM2	93	108	21	79	43	71	83	123
HGLibA_00995	ADM2	4	0	45	0	2	0	30	22
HGLibA_00996	ADM2	31	16	33	35	4	22	103	68
HGLibA_00997	ADM5	28	23	23	29	11	26	129	63
HGLibA_00998	ADM5	123	177	111	76	55	125	184	189
HGLibA_00999	ADM5	18	1	5	4	0	18	17	25
HGLibA_01000	ADNP	24	5	35	30	10	11	72	54
HGLibA_01001	ADNP	181	145	71	118	67	64	219	155
HGLibA_01002	ADNP	33	25	43	38	9	41	156	122
HGLibA_01003	ADNP2	290	224	280	193	168	75	267	296
HGLibA_01004	ADNP2	5	12	36	13	0	3	39	34
HGLibA_01005	ADNP2	23	19	26	54	11	32	96	69
HGLibA_01006	ADO	52	65	38	51	18	25	291	202
HGLibA_01007	ADO	39	29	18	12	8	0	23	49
HGLibA_01008	ADO	28	6	38	31	108	24	75	94
HGLibA_01009	ADORA1	17	24	56	18	11	37	87	85
HGLibA_01010	ADORA1	140	76	129	82	46	117	209	192
HGLibA_01011	ADORA1	287	249	89	295	157	163	327	401
HGLibA_01012	ADORA2A	71	37	116	52	26	116	207	141
HGLibA_01013	ADORA2A	114	91	63	160	51	122	177	118
HGLibA_01014	ADORA2A	214	87	191	88	43	115	293	227
HGLibA_01015	ADORA2B	159	144	114	129	80	134	217	219
HGLibA_01016	ADORA2B	15	54	50	54	10	71	135	101
HGLibA_01017	ADORA2B	44	38	44	55	10	42	94	100
HGLibA_01018	ADORA3	221	287	138	201	198	105	194	211
HGLibA_01019	ADORA3	87	126	114	115	30	136	264	187
HGLibA_01020	ADORA3	23	8	32	32	8	58	91	51
HGLibA_01021	ADPGK	143	83	132	66	80	55	185	128
HGLibA_01022	ADPGK	192	89	122	104	97	151	361	258
HGLibA_01023	ADPGK	195	141	99	208	87	151	474	360
HGLibA_01024	ADPRH	78	57	77	66	13	34	96	93
HGLibA_01025	ADPRH	118	86	96	73	21	180	231	210
HGLibA_01026	ADPRH	24	28	39	22	3	28	116	74
HGLibA_01027	ADPRHL1	77	164	44	138	38	32	156	138
HGLibA_01028	ADPRHL1	293	190	169	75	123	110	357	292
HGLibA_01029	ADPRHL1	92	77	136	79	17	79	181	194
HGLibA_01030	ADPRHL2	223	187	221	238	124	186	412	353
HGLibA_01031	ADPRHL2	91	38	114	102	24	75	265	191
HGLibA_01032	ADPRHL2	120	118	34	126	85	67	160	114
HGLibA_01033	ADPRM	249	250	203	226	35	144	291	232
HGLibA_01034	ADPRM	172	52	150	68	33	78	212	149
HGLibA_01035	ADPRM	47	50	32	22	35	50	92	103
HGLibA_01036	ADRA1A	75	13	49	27	14	34	173	152
HGLibA_01037	ADRA1A	440	333	354	327	190	275	648	556
HGLibA_01038	ADRA1A	11	12	14	12	0	17	74	41
HGLibA_01039	ADRA1B	338	225	198	243	176	156	395	331
HGLibA_01040	ADRA1B	45	51	14	83	16	51	64	80
HGLibA_01041	ADRA1B	98	14	133	36	11	35	211	152
HGLibA_01042	ADRA1D	140	226	128	96	66	72	265	231
HGLibA_01043	ADRA1D	157	158	39	124	129	107	158	173
HGLibA_01044	ADRA1D	72	99	70	58	33	41	134	160
HGLibA_01045	ADRA2A	172	118	87	19	93	18	192	147
HGLibA_01046	ADRA2A	132	126	105	112	194	73	180	104
HGLibA_01047	ADRA2A	292	237	281	184	150	101	383	300
HGLibA_01048	ADRA2B	50	77	62	45	4	62	150	129
HGLibA_01049	ADRA2B	59	54	94	73	26	69	220	181
HGLibA_01050	ADRA2B	51	93	69	72	21	45	84	129
HGLibA_01051	ADRA2C	56	70	63	74	4	73	210	132
HGLibA_01052	ADRA2C	19	40	14	47	22	20	103	56
HGLibA_01053	ADRA2C	98	83	46	62	68	123	145	203
HGLibA_01054	ADRB1	300	370	163	215	97	198	525	378
HGLibA_01055	ADRB1	34	64	18	25	29	31	30	37
HGLibA_01056	ADRB1	78	104	151	79	27	112	122	94
HGLibA_01057	ADRB2	141	89	58	163	29	47	263	199
HGLibA_01058	ADRB2	92	85	120	79	40	90	380	331
HGLibA_01059	ADRB2	74	72	7	25	14	20	37	32
HGLibA_01060	ADRB3	257	210	130	212	128	164	338	270
HGLibA_01061	ADRB3	18	36	59	44	9	68	92	67
HGLibA_01062	ADRB3	86	18	12	77	20	45	44	59
HGLibA_01063	ADRBK1	99	155	140	182	36	127	348	260
HGLibA_01064	ADRBK1	111	99	77	154	28	98	250	222
HGLibA_01065	ADRBK1	122	172	112	150	31	77	221	163
HGLibA_01066	ADRBK2	151	61	103	92	85	55	229	137
HGLibA_01067	ADRBK2	38	42	41	48	23	35	108	100
HGLibA_01068	ADRBK2	50	44	145	44	6	148	289	256
HGLibA_01069	ADRM1	231	207	221	192	81	187	342	264
HGLibA_01070	ADRM1	224	210	214	195	172	198	449	305
HGLibA_01071	ADRM1	0	42	0	7	0	0	0	14
HGLibA_01072	ADSL	205	110	83	89	65	168	236	226
HGLibA_01073	ADSL	15	28	32	66	6	23	170	94
HGLibA_01074	ADSL	249	240	130	225	130	139	329	288
HGLibA_01075	ADSS	62	63	23	90	34	72	88	88
HGLibA_01076	ADSS	39	32	105	49	15	125	140	162
HGLibA_01077	ADSS	113	76	124	84	52	89	190	196
HGLibA_01078	ADSSL1	113	76	40	68	40	74	234	114
HGLibA_01079	ADSSL1	284	244	220	233	127	182	590	460
HGLibA_01080	ADSSL1	67	37	43	72	5	74	236	172
HGLibA_01081	ADTRP	35	32	14	38	34	41	128	128
HGLibA_01082	ADTRP	144	85	144	131	43	113	390	248
HGLibA_01083	ADTRP	242	384	190	335	138	358	561	608
HGLibA_01084	AEBP1	64	131	36	62	15	66	123	131
HGLibA_01085	AEBP1	86	34	45	1	71	28	140	136
HGLibA_01086	AEBP1	69	32	138	9	8	74	153	131
HGLibA_01087	AEBP2	151	144	92	76	46	112	225	128
HGLibA_01088	AEBP2	96	66	105	78	37	28	172	138
HGLibA_01089	AEBP2	75	42	53	37	18	39	115	89
HGLibA_01090	AEN	130	61	122	71	14	80	176	216
HGLibA_01091	AEN	50	36	15	31	29	38	67	60
HGLibA_01092	AEN	209	142	118	144	78	55	262	200
HGLibA_01093	AES	184	242	120	87	54	92	172	176
HGLibA_01094	AES	53	58	42	50	39	69	143	86
HGLibA_01095	AES	148	130	88	89	22	59	119	138
HGLibA_01096	AFAP1	148	101	200	149	39	138	365	410
HGLibA_01097	AFAP1	43	38	40	76	4	22	134	116
HGLibA_01098	AFAP1	160	75	260	135	29	127	292	269
HGLibA_01099	AFAP1L1	59	85	55	60	36	34	105	112
HGLibA_01100	AFAP1L1	152	193	121	141	61	56	250	196
HGLibA_01101	AFAP1L1	224	37	164	41	96	39	97	132
HGLibA_01102	AFAP1L2	73	30	73	34	35	35	251	147
HGLibA_01103	AFAP1L2	192	110	137	116	52	65	244	129
HGLibA_01104	AFAP1L2	149	78	238	72	18	86	274	179
HGLibA_01105	AFF1	131	73	229	131	28	234	478	377
HGLibA_01106	AFF1	94	93	121	167	8	212	440	429
HGLibA_01107	AFF1	20	41	17	10	27	14	29	36
HGLibA_01108	AFF2	161	171	148	94	79	84	219	220
HGLibA_01109	AFF2	34	38	42	42	3	44	154	112
HGLibA_01110	AFF2	55	40	102	73	9	117	272	175
HGLibA_01111	AFF3	18	12	23	4	0	26	28	35
HGLibA_01112	AFF3	278	178	166	131	133	149	375	416
HGLibA_01113	AFF3	82	42	71	58	6	87	284	136
HGLibA_01114	AFF4	15	11	49	27	6	23	120	152
HGLibA_01115	AFF4	71	76	43	56	27	28	58	75
HGLibA_01116	AFF4	128	89	366	146	36	167	598	353
HGLibA_01117	AFG3L2	31	36	6	44	7	7	137	171
HGLibA_01118	AFG3L2	26	24	31	107	11	42	174	152
HGLibA_01119	AFG3L2	22	3	49	14	1	21	211	152
HGLibA_01120	AFM	18	7	53	8	0	69	137	96
HGLibA_01121	AFM	219	210	89	278	149	170	528	320
HGLibA_01122	AFM	75	56	5	32	21	81	146	102
HGLibA_01123	AFMID	19	83	0	63	19	56	125	105
HGLibA_01124	AFMID	44	36	21	22	17	48	122	99
HGLibA_01125	AFMID	185	154	98	189	111	152	299	259
HGLibA_01126	AFP	97	82	104	76	36	132	275	250
HGLibA_01127	AFP	158	118	205	174	35	155	413	393
HGLibA_01128	AFP	34	11	71	5	6	28	136	96
HGLibA_01129	AFTPH	22	6	49	20	6	9	138	70
HGLibA_01130	AFTPH	202	173	135	210	22	152	405	236
HGLibA_01131	AFTPH	187	121	93	125	87	139	262	234
HGLibA_01132	AGA	84	51	197	26	15	58	148	101
HGLibA_01133	AGA	155	122	222	152	54	166	334	295
HGLibA_01134	AGA	38	32	121	62	12	115	201	196
HGLibA_01135	AGAP1	276	277	75	133	62850	113	219	160
HGLibA_01136	AGAP1	76	34	55	44	20	37	75	104
HGLibA_01137	AGAP1	22	17	13	0	4	55	66	46
HGLibA_01138	AGAP11	42	54	65	53	11	131	234	234
HGLibA_01139	AGAP11	186	93	245	109	25	218	563	356
HGLibA_01140	AGAP11	217	159	66	200	68	131	240	214
HGLibA_01141	AGAP2	44	49	16	66	30	43	141	82
HGLibA_01142	AGAP2	107	97	62	73	34	91	144	175
HGLibA_01143	AGAP2	237	174	138	224	709	112	244	244
HGLibA_01144	AGAP3	101	71	111	31	13	98	244	210
HGLibA_01145	AGAP3	72	106	49	107	57	79	197	146
HGLibA_01146	AGAP3	118	125	57	56	78	21	147	133
HGLibA_01147	AGAP4	50	46	90	74	4	80	798	586
HGLibA_01148	AGAP4	342	233	523	309	34	224	2131	1528
HGLibA_01149	AGAP4	185	131	400	204	28	210	499	360
HGLibA_01150	AGAP5	41	34	55	54	6	78	349	258
HGLibA_01153	AGAP6	78	30	89	68	12	73	206	141
HGLibA_01154	AGAP6	24	21	18	11	12	37	245	163
HGLibA_01163	AGAP9	16	17	23	63	7	34	310	277
HGLibA_01164	AGAP9	69	14	47	46	16	1	338	295
HGLibA_01165	AGBL1	208	180	132	253	89	233	346	323
HGLibA_01166	AGBL1	139	73	142	108	62	97	327	242
HGLibA_01167	AGBL1	34	43	47	57	4	27	101	119
HGLibA_01168	AGBL2	93	51	115	100	17	81	300	199
HGLibA_01169	AGBL2	50	74	93	99	8	32	140	145
HGLibA_01170	AGBL2	103	60	126	81	29	78	328	302
HGLibA_01171	AGBL3	75	64	184	78	14	102	320	249
HGLibA_01172	AGBL3	178	141	90	182	41	135	279	243
HGLibA_01173	AGBL3	205	154	198	156	45	233	359	353
HGLibA_01174	AGBL4	157	146	153	109	60	110	189	155
HGLibA_01175	AGBL4	151	100	115	136	50	77	143	233
HGLibA_01176	AGBL4	103	105	80	79	19	66	130	146
HGLibA_01177	AGBL5	215	173	171	168	70	97	407	346
HGLibA_01178	AGBL5	53	44	5	38	57	12	74	66
HGLibA_01179	AGBL5	41	17	17	56	9	65	146	76
HGLibA_01180	AGER	201	159	136	120	189	188	205	209
HGLibA_01181	AGER	102	37	109	73	25	123	208	181
HGLibA_01182	AGER	98	87	40	77	46	72	239	237
HGLibA_01183	AGFG1	7	44	21	33	12	29	69	109
HGLibA_01184	AGFG1	198	131	146	92	57	81	156	154
HGLibA_01185	AGFG1	76	48	158	60	15	111	292	238
HGLibA_01186	AGFG2	180	167	248	190	75	199	368	284
HGLibA_01187	AGFG2	80	54	58	79	15	98	217	205
HGLibA_01188	AGFG2	28	23	41	50	9	31	69	86
HGLibA_01189	AGGF1	60	47	131	70	8	130	356	265
HGLibA_01190	AGGF1	49	43	73	31	13	56	128	88
HGLibA_01191	AGGF1	106	29	97	94	30	36	260	153
HGLibA_01192	AGK	121	91	53	169	66	116	215	223
HGLibA_01193	AGK	149	145	135	145	57	90	268	227
HGLibA_01194	AGK	138	150	102	231	87	160	424	336
HGLibA_01195	AGL	44	23	29	35	15	79	177	118
HGLibA_01196	AGL	42	17	29	40	0	65	92	77
HGLibA_01197	AGL	93	59	160	129	27	29	185	216
HGLibA_01198	AGMAT	146	117	147	84	23	128	173	176
HGLibA_01199	AGMAT	159	208	87	168	74	88	209	154
HGLibA_01200	AGMAT	59	36	42	43	11	21	127	100
HGLibA_01201	AGMO	132	159	88	80	73	103	166	145
HGLibA_01202	AGMO	235	125	169	139	129	141	372	249
HGLibA_01203	AGMO	30	7	8	12	5	43	47	97
HGLibA_01204	AGO1	287	356	184	251	191	185	462	389
HGLibA_01205	AGO1	191	137	179	109	69	114	342	240
HGLibA_01206	AGO1	49	73	68	29	66	28	107	97
HGLibA_01207	AGO2	158	323	141	352	157	141	203	259
HGLibA_01208	AGO2	122	82	88	52	37	6	110	122
HGLibA_01209	AGO2	58	78	2	101	50	80	127	155
HGLibA_01210	AGO3	53	47	33	35	9	28	182	191
HGLibA_01211	AGO3	36	30	46	44	6	50	136	134
HGLibA_01212	AGO3	145	136	133	155	48	148	289	242
HGLibA_01213	AGO4	32	29	53	41	12	12	74	43
HGLibA_01214	AGO4	130	119	183	94	24	179	232	256
HGLibA_01215	AGO4	100	41	94	98	16	148	361	210
HGLibA_01216	AGPAT1	223	252	95	180	140	45	194	187
HGLibA_01217	AGPAT1	95	45	63	101	40	87	230	203
HGLibA_01218	AGPAT1	122	63	69	46	33	93	193	174
HGLibA_01219	AGPAT2	111	81	36	41	55	47	124	176
HGLibA_01220	AGPAT2	84	40	85	65	40	39	74	89
HGLibA_01221	AGPAT2	284	195	120	144	136	118	429	264
HGLibA_01222	AGPAT3	159	51	186	118	28	43	311	140
HGLibA_01223	AGPAT3	228	267	166	153	122	140	386	252
HGLibA_01224	AGPAT3	193	162	181	157	52	144	266	179
HGLibA_01225	AGPAT4	239	152	168	219	51	219	395	296
HGLibA_01226	AGPAT4	114	56	82	30	12	18	88	104
HGLibA_01227	AGPAT4	38	7	8	36	18	19	71	61
HGLibA_01228	AGPAT5	78	56	46	61	24	102	145	118
HGLibA_01229	AGPAT5	74	75	96	55	22	45	161	150
HGLibA_01230	AGPAT5	29	5	27	15	4	1	62	40
HGLibA_01231	AGPAT6	88	118	86	158	34	103	235	290
HGLibA_01232	AGPAT6	113	100	115	60	57	78	224	150
HGLibA_01233	AGPAT6	21	21	3	6	18	16	95	87
HGLibA_01234	AGPAT9	36	16	20	17	9	15	156	71
HGLibA_01235	AGPAT9	112	69	105	64	26	130	308	280
HGLibA_01236	AGPAT9	85	63	58	86	19	46	193	199
HGLibA_01237	AGPHD1	205	101	193	118	23	98	315	252
HGLibA_01238	AGPHD1	75	51	108	73	14	120	259	256
HGLibA_01239	AGPHD1	100	70	63	89	17	86	271	199
HGLibA_01240	AGPS	83	32	64	34	17	63	164	154
HGLibA_01241	AGPS	59	25	178	41	5	104	280	116
HGLibA_01242	AGPS	40	26	21	35	14	58	94	111
HGLibA_01243	AGR2	110	78	191	140	34	221	413	366
HGLibA_01244	AGR2	12	3	8	18	2	32	132	46
HGLibA_01245	AGR2	82	59	96	69	18	157	300	279
HGLibA_01246	AGR3	20	21	38	21	1	53	85	93
HGLibA_01247	AGR3	50	38	156	53	21	99	250	205
HGLibA_01248	AGR3	20	16	104	38	2	131	277	226
HGLibA_01249	AGRN	122	91	71	89	143	91	168	168
HGLibA_01250	AGRN	345	299	106	216	185	211	422	257
HGLibA_01251	AGRN	32	37	97	85	8	54	112	150
HGLibA_01252	AGRP	246	242	157	159	121	172	337	211
HGLibA_01253	AGRP	217	163	176	140	104	104	347	279
HGLibA_01254	AGRP	222	173	223	195	55	217	339	381
HGLibA_01255	AGT	169	135	95	134	43	143	305	352
HGLibA_01256	AGT	74	104	64	43	44	67	87	70
HGLibA_01257	AGT	40	6	33	9	1	51	52	10
HGLibA_01258	AGTPBP1	58	64	82	73	12	90	242	180
HGLibA_01259	AGTPBP1	163	72	156	94	34	125	370	357
HGLibA_01260	AGTPBP1	129	64	129	87	11	165	289	296
HGLibA_01261	AGTR1	158	53	105	99	56	85	211	115
HGLibA_01262	AGTR1	169	101	131	69	35	65	265	144
HGLibA_01263	AGTR1	83	53	120	96	12	66	159	281
HGLibA_01264	AGTR2	162	113	124	110	48	128	252	229
HGLibA_01265	AGTR2	85	60	189	41	23	69	195	148
HGLibA_01266	AGTR2	121	76	125	147	38	88	198	102
HGLibA_01267	AGTRAP	53	45	42	36	3	45	114	57
HGLibA_01268	AGTRAP	325	289	166	148	100	134	376	339
HGLibA_01269	AGTRAP	112	111	121	87	54	98	141	166
HGLibA_01270	AGXT	68	85	42	59	52	58	113	112
HGLibA_01271	AGXT	221	168	222	177	100	115	336	247
HGLibA_01272	AGXT	49	16	0	16	5	12	58	28
HGLibA_01273	AGXT2	76	42	39	14	31	29	55	38
HGLibA_01274	AGXT2	3	17	14	27	0	4	63	46
HGLibA_01275	AGXT2	124	49	202	116	37	70	213	183
HGLibA_01276	AGXT2L1	208	143	103	113	107190	159	258	322
HGLibA_01277	AGXT2L1	96	89	130	102	25	90	278	268
HGLibA_01278	AGXT2L1	146	100	174	87	117	142	124	144
HGLibA_01279	AGXT2L2	81	39	47	58	14	32	166	183
HGLibA_01280	AGXT2L2	637	621	434	434	409	536	1177	870
HGLibA_01281	AGXT2L2	206	159	114	210	75	193	325	334
HGLibA_01282	AHCTF1	41	25	32	42	4	50	84	81
HGLibA_01283	AHCTF1	214	141	192	289	51	95	781	760
HGLibA_01284	AHCTF1	24	5	31	18	4	25	157	149
HGLibA_01285	AHCY	145	143	100	142	135	81	360	267
HGLibA_01286	AHCY	79	98	68	122	49	118	477	381
HGLibA_01287	AHCY	46	30	38	38	5	47	361	296
HGLibA_01288	AHCYL1	170	98	105	93	29	96	341	360
HGLibA_01289	AHCYL1	31	10	19	5	8	13	20	19
HGLibA_01290	AHCYL1	102	49	79	38	25	70	157	105
HGLibA_01291	AHCYL2	155	204	145	144	331	64	203	180
HGLibA_01292	AHCYL2	390	298	259	269	145	316	639	494
HGLibA_01293	AHCYL2	62	99	104	116	24	119	181	197
HGLibA_01294	AHDC1	50	24	12	7	17	17	33	43
HGLibA_01295	AHDC1	109	91	95	113	62	89	147	130
HGLibA_01296	AHDC1	97	94	68	79	95	73	195	127
HGLibA_01297	AHI1	123	106	192	99	31	214	292	259
HGLibA_01298	AHI1	157	39	126	18	43	15	181	189
HGLibA_01299	AHI1	14	5	17	10	0	28	48	45
HGLibA_01300	AHNAK	232	426	146	334	169	157	354	290
HGLibA_01301	AHNAK	291	138	169	154	78	145	413	269
HGLibA_01302	AHNAK	147	61	314	70	19	86	253	141
HGLibA_01303	AHNAK2	69	41	70	44	36	51	106	168
HGLibA_01304	AHNAK2	27	10	18	17	16	9	23	37
HGLibA_01305	AHNAK2	22	48	8	37	10	32	146	131
HGLibA_01306	AHR	45	61	29	45	15	55	127	83
HGLibA_01307	AHR	246	102	136	183	55	192	350	293
HGLibA_01308	AHR	32	28	21	21	11	39	43	43
HGLibA_01309	AHRR	165	144	143	137	95	83	226	155
HGLibA_01310	AHRR	313	200	125	180	137	125	374	326
HGLibA_01311	AHRR	52	95	34	61	85	28	124	97
HGLibA_01312	AHSA1	47	61	116	84	23	124	225	132
HGLibA_01313	AHSA1	306	140	311	142	87	69	362	217
HGLibA_01314	AHSA1	54	26	34	52	55	61	168	142
HGLibA_01315	AHSA2	73	53	90	67	8	136	189	229
HGLibA_01316	AHSA2	53	24	40	58	8	68	306	269
HGLibA_01317	AHSA2	58	44	133	70	5	95	231	215
HGLibA_01318	AHSG	41	42	83	47	9	64	309	208
HGLibA_01319	AHSG	8	0	13	0	0	0	6	6
HGLibA_01320	AHSG	42	72	107	88	21	142	210	261
HGLibA_01321	AHSP	98	52	61	72	20	31	241	190
HGLibA_01322	AHSP	3	8	8	19	0	24	44	26
HGLibA_01323	AHSP	97	259	96	200	41	168	334	329
HGLibA_01324	AICDA	116	173	80	129	50	143	207	272
HGLibA_01325	AICDA	167	204	93	175	34	138	295	355
HGLibA_01326	AICDA	334	165	115	184	104	95	313	268
HGLibA_01327	AIDA	109	74	110	126	49	97	207	274
HGLibA_01328	AIDA	50	27	30	45	12	37	139	68
HGLibA_01329	AIDA	11	10	12	4	2	15	17	46
HGLibA_01330	AIF1	121	57	82	40	42	56	132	135
HGLibA_01331	AIF1	95	143	63	112	104	91	237	280
HGLibA_01332	AIF1	108	74	179	121	20	132	291	266
HGLibA_01333	AIF1L	4	5	16	3	6	28	31	14
HGLibA_01334	AIF1L	168	121	131	55	107	107	270	164
HGLibA_01335	AIF1L	126	201	80	216	44	177	206	193
HGLibA_01336	AIFM1	36	65	62	91	23	44	255	192
HGLibA_01337	AIFM1	40	39	55	105	7	42	504	414
HGLibA_01338	AIFM1	22	10	55	5	2	22	276	251
HGLibA_01339	AIFM2	93	116	42	69	94	57	95	104
HGLibA_01340	AIFM2	7	4	8	12	1	2	48	24
HGLibA_01341	AIFM2	64	28	19	34	13	26	123	51
HGLibA_01342	AIFM3	133	159	40	219	135	62	244	150
HGLibA_01343	AIFM3	225	246	110	142	237	144	328	205
HGLibA_01344	AIFM3	113	98	103	101	65	88	412	451
HGLibA_01345	AIG1	49	39	104	59	14	56	198	190
HGLibA_01346	AIG1	174	183	142	196	78	146	227	280
HGLibA_01347	AIG1	54	60	111	35	11	44	118	232
HGLibA_01348	AIM1	234	205	104	203	80	142	341	291
HGLibA_01349	AIM1	0	2	16	5	1	0	11	35
HGLibA_01350	AIM1	43	27	79	48	7	37	166	181
HGLibA_01351	AIM2	184	116	165	79	75	106	275	193
HGLibA_01352	AIM2	8	0	5	8	2	6	22	9
HGLibA_01353	AIM2	82	57	44	39	20	93	214	166
HGLibA_01354	AIMP1	107	101	131	117	51	104	293	333
HGLibA_01355	AIMP1	36	51	108	51	3	67	185	102
HGLibA_01356	AIMP1	39	4	9	6	1	0	34	26
HGLibA_01357	AIMP2	83	66	122	43	22	75	249	216
HGLibA_01358	AIMP2	287	267	165	292	187	192	461	424
HGLibA_01359	AIMP2	4	2	2	0	0	16	35	16
HGLibA_01360	AIP	66	42	80	33	9	60	109	122
HGLibA_01361	AIP	126	121	105	117	39	100	263	165
HGLibA_01362	AIP	308	287	114	159	425	166	303	228
HGLibA_01363	AIPL1	109	63	145	100	9	138	271	271
HGLibA_01364	AIPL1	72	24	12	15	25	14	64	66
HGLibA_01365	AIPL1	123	144	106	48	75	71	242	133
HGLibA_01366	AIRE	52	51	68	76	8	83	177	113
HGLibA_01367	AIRE	31	31	22	33	17	55	45	76
HGLibA_01368	AIRE	88	46	65	55	24	57	133	130
HGLibA_01369	AJAP1	212	243	223	264	111	184	414	221
HGLibA_01370	AJAP1	85	95	75	114	106	25	109	164
HGLibA_01371	AJAP1	40	1	56	9	5	22	31	46
HGLibA_01372	AJUBA	247	153	235	199	144	40	337	335
HGLibA_01373	AJUBA	68	31	32	70	28	14	108	61
HGLibA_01374	AJUBA	53	4	23	21	0	2	63	21
HGLibA_01375	AK1	387	178	133	155	210	130	354	285
HGLibA_01376	AK1	135	42	70	42	25	6	94	84
HGLibA_01377	AK1	161	87	172	111	24	83	336	239
HGLibA_01378	AK2	181	170	99	145	58	48	248	216
HGLibA_01379	AK2	145	100	118	98	54	114	337	264
HGLibA_01380	AK2	224	148	301	157	32	187	396	301
HGLibA_01381	AK3	121	81	91	76	17	125	262	253
HGLibA_01382	AK3	2	12	3	0	0	10	32	10
HGLibA_01383	AK3	391	266	240	255	283	197	404	329
HGLibA_01384	AK4	266	124	180	188	116	122	370	327
HGLibA_01385	AK4	42	31	143	35	3	77	183	185
HGLibA_01386	AK4	7	8	5	5	5	25	18	46
HGLibA_01387	AK5	45	37	67	48	7	61	276	193
HGLibA_01388	AK5	131	95	142	91	32	96	288	254
HGLibA_01389	AK5	24	24	84	23	9	58	115	107
HGLibA_01390	AK6	0	6	0	3	0	7	58	43
HGLibA_01391	AK6	36	33	22	36	3	21	312	291
HGLibA_01392	AK6	30	2	0	8	3	1	52	45
HGLibA_01393	AK7	86	55	36	101	34	19	85	83
HGLibA_01394	AK7	77	94	28	81	9	36	143	127
HGLibA_01395	AK7	5	4	19	0	0	5	3	16
HGLibA_01396	AK8	35	33	59	55	7	46	222	261
HGLibA_01397	AK8	97	69	86	98	41	37	124	118
HGLibA_01398	AK8	43	14	63	34	7	37	146	155
HGLibA_01399	AK9	101	88	124	124	30	77	238	173
HGLibA_01400	AK9	76	68	152	74	45	107	122	180
HGLibA_01401	AK9	99	77	315	100	41	110	280	201
HGLibA_01402	AKAP1	193	126	150	202	143	86	403	383
HGLibA_01403	AKAP1	51	14	17	33	20	24	136	77
HGLibA_01404	AKAP1	129	153	124	85	20	82	144	125
HGLibA_01405	AKAP10	245	176	319	136	101	163	539	460
HGLibA_01406	AKAP10	50	138	67	74	20	71	252	226
HGLibA_01407	AKAP10	100	89	75	118	92	75	241	182
HGLibA_01408	AKAP11	99	59	83	89	19	114	134	117
HGLibA_01409	AKAP11	175	69	75	57	28	108	336	335
HGLibA_01410	AKAP11	56	55	76	65	28	40	192	184
HGLibA_01411	AKAP12	97	55	119	63	38	80	173	116
HGLibA_01412	AKAP12	126	111	89	147	50	87	225	195
HGLibA_01413	AKAP12	400	309	236	278	183	316	534	392
HGLibA_01414	AKAP13	276	144	286	94	68	171	330	291
HGLibA_01415	AKAP13	150	139	35	52	40	91	199	128
HGLibA_01416	AKAP13	90	63	128	76	16	58	228	182
HGLibA_01417	AKAP14	107	54	89	100	22	102	136	171
HGLibA_01418	AKAP14	95	105	79	106	30	118	260	240
HGLibA_01419	AKAP14	146	70	88	108	69	38	179	127
HGLibA_01420	AKAP17A_X	615	722	466	616	348	392	855	580
HGLibA_01421	AKAP17A_X	652	908	312	575	554	454	908	681
HGLibA_01422	AKAP17A_X	255	200	313	306	47	275	751	636
HGLibA_01426	AKAP2	39	20	73	38	4	108	264	215
HGLibA_01427	AKAP2	121	48	58	44	22	60	163	143
HGLibA_01428	AKAP2	108	71	188	100	17	98	250	303
HGLibA_01429	AKAP3	13	5	17	0	0	8	8	12
HGLibA_01430	AKAP3	106	38	71	106	18	47	153	126
HGLibA_01431	AKAP3	93	99	54	150	65	93	214	164
HGLibA_01432	AKAP4	63	31	110	83	7	89	197	143
HGLibA_01433	AKAP4	129	48	151	100	29	84	181	219
HGLibA_01434	AKAP4	588	397	331	452	289	238	503	428
HGLibA_01435	AKAP5	115	82	71	55	10	47	185	158
HGLibA_01436	AKAP5	159	101	87	203	45	134	247	202
HGLibA_01437	AKAP5	139	82	107	90	18	68	183	199
HGLibA_01438	AKAP6	188	181	105	224	69	164	468	529
HGLibA_01439	AKAP6	214	253	134	200	83	224	347	341
HGLibA_01440	AKAP6	88	67	101	62	15	97	187	201
HGLibA_01441	AKAP7	67	94	145	187	5	60	129	150
HGLibA_01442	AKAP7	18	34	61	34	5	41	109	78
HGLibA_01443	AKAP7	81	25	60	54	16	41	153	170
HGLibA_01444	AKAP8	63	35	42	35	16	40	162	107
HGLibA_01445	AKAP8	77	77	135	96	7	138	254	209
HGLibA_01446	AKAP8	15	20	0	15	0	2	18	16
HGLibA_01447	AKAP8L	120	71	131	116	16	103	210	277
HGLibA_01448	AKAP8L	195	297	114	250	155	143	395	301
HGLibA_01449	AKAP8L	31	17	40	27	2	66	231	157
HGLibA_01450	AKAP9	171	112	89	114	24	130	323	257
HGLibA_01451	AKAP9	19	25	16	27	5	35	109	66
HGLibA_01452	AKAP9	28	4	46	11	1	14	118	54
HGLibA_01453	AKIP1	124	136	145	91	31	33	247	171
HGLibA_01454	AKIP1	131	62	43	91	78	65	103	115
HGLibA_01455	AKIP1	273	153	205	271	92	184	562	359
HGLibA_01456	AKIRIN1	101	51	151	75	20	102	284	271
HGLibA_01457	AKIRIN1	382	339	334	265	113	256	803	631
HGLibA_01458	AKIRIN1	7	17	18	12	13	14	75	24
HGLibA_01459	AKIRIN2	3	8	19	22	4	41	98	49
HGLibA_01460	AKIRIN2	56	21	224	50	10	127	354	299
HGLibA_01461	AKIRIN2	27	30	46	37	4	19	137	118
HGLibA_01462	AKNA	298	247	225	284	98	283	515	434
HGLibA_01463	AKNA	57	72	36	51	24	59	120	137
HGLibA_01464	AKNA	72	143	63	89	46	48	226	216
HGLibA_01465	AKNAD1	31	8	18	21	7	31	164	107
HGLibA_01466	AKNAD1	22	29	39	34	2	37	130	118
HGLibA_01467	AKNAD1	123	38	94	90	35	41	314	239
HGLibA_01468	AKR1A1	265	315	175	270	131	209	388	309
HGLibA_01469	AKR1A1	142	104	91	127	50	176	302	226
HGLibA_01470	AKR1A1	174	123	154	135	30	129	283	189
HGLibA_01471	AKR1B1	364	252	215	187	210	107	357	275
HGLibA_01472	AKR1B1	101	114	70	144	36	55	129	174
HGLibA_01473	AKR1B1	49	28	64	97	23	101	113	129
HGLibA_01474	AKR1B10	59	56	85	90	26	84	140	162
HGLibA_01475	AKR1B10	23	6	28	12	0	20	63	35
HGLibA_01476	AKR1B10	104	83	98	111	37	121	256	208
HGLibA_01477	AKR1B15	134	197	205	188	43	226	411	281
HGLibA_01478	AKR1B15	93	57	160	100	22	80	348	185
HGLibA_01479	AKR1B15	25	36	61	48	4	42	64	85
HGLibA_01480	AKR1C1	206	156	275	197	42	361	533	558
HGLibA_01481	AKR1C1	50	44	33	63	15	32	94	159
HGLibA_01482	AKR1C1	172	104	269	206	30	259	493	455
HGLibA_01483	AKR1C2	49	44	133	93	16	129	336	308
HGLibA_01484	AKR1C2	137	96	249	102	13	131	305	325
HGLibA_01485	AKR1C2	22	28	28	40	7	57	97	79
HGLibA_01486	AKR1C3	46	30	60	69	3	64	182	115
HGLibA_01487	AKR1C3	87	49	46	63	21	93	251	157
HGLibA_01488	AKR1C3	234	153	254	216	73	217	533	514
HGLibA_01489	AKR1C4	18	7	107	23	2	61	131	96
HGLibA_01490	AKR1C4	28	27	25	32	2	73	135	91
HGLibA_01491	AKR1C4	288	153	148	69	74	192	318	232
HGLibA_01492	AKR1D1	320	224	210	187	222	146	529	345
HGLibA_01493	AKR1D1	114	89	134	106	34	126	275	316
HGLibA_01494	AKR1D1	70	54	102	91	17	116	230	226
HGLibA_01495	AKR1E2	191	155	194	129	71	167	388	321
HGLibA_01496	AKR1E2	161	182	92	89	69	147	305	156
HGLibA_01497	AKR1E2	84	89	72	109	34	92	197	175
HGLibA_01498	AKR7A2	467	257	391	238	107	261	829	563
HGLibA_01499	AKR7A2	61	89	49	61	15	85	182	140
HGLibA_01500	AKR7A2	241	185	289	294	102	244	535	486
HGLibA_01501	AKR7A3	132	103	80	74	37	115	242	267
HGLibA_01502	AKR7A3	125	52	163	50	25	65	192	103
HGLibA_01503	AKR7A3	119	78	93	91	33	30	203	233
HGLibA_01504	AKT1	66	111	112	73	31	98	202	189
HGLibA_01505	AKT1	241	312	148	225	115	177	384	372
HGLibA_01506	AKT1	145	128	129	86	78	135	273	227
HGLibA_01507	AKT1S1	58	48	49	53	51	18	90	81
HGLibA_01508	AKT1S1	297	108	75	228	154	64	147	186
HGLibA_01509	AKT1S1	76	46	25	11	20	56	148	89
HGLibA_01510	AKT2	87	48	114	74	24	38	283	188
HGLibA_01511	AKT2	306	255	109	348	106	206	604	435
HGLibA_01512	AKT2	112	80	185	180	21	153	199	267
HGLibA_01513	AKT3	86	96	100	34	43	60	229	139
HGLibA_01514	AKT3	90	72	135	89	14	165	322	282
HGLibA_01515	AKT3	9	2	6	2	1	19	46	17
HGLibA_01516	AKTIP	202	214	183	189	143	165	277	277
HGLibA_01517	AKTIP	177	125	208	163	95	202	362	340
HGLibA_01518	AKTIP	61	25	96	83	16	166	230	267
HGLibA_01519	ALAD	87	85	47	99	15	71	210	234
HGLibA_01520	ALAD	106	121	90	98	88	106	231	173
HGLibA_01521	ALAD	209	217	58	107	119	92	222	142
HGLibA_01522	ALAS1	16	18	20	44	1	30	82	75
HGLibA_01523	ALAS1	138	194	170	157	25	150	268	193
HGLibA_01524	ALAS1	97	71	70	105	28	130	366	300
HGLibA_01525	ALAS2	52	28	68	83	13	73	125	97
HGLibA_01526	ALAS2	136	170	136	111	53	186	301	267
HGLibA_01527	ALAS2	85	102	52	61	25	48	175	132
HGLibA_01528	ALB	76	92	49	102	21	161	295	366
HGLibA_01529	ALB	18	15	21	8	2	65	95	76
HGLibA_01530	ALB	56	8	104	47	7	15	102	47
HGLibA_01531	ALCAM	129	85	147	75	39	103	335	294
HGLibA_01532	ALCAM	148	92	151	164	86	117	210	222
HGLibA_01533	ALCAM	109	47	130	54	28	69	241	160
HGLibA_01534	ALDH16A1	27	2	5	16	2	14	68	100
HGLibA_01535	ALDH16A1	89	67	63	65	56	34	129	134
HGLibA_01536	ALDH16A1	98	60	120	41	32	111	160	192
HGLibA_01537	ALDH18A1	66	40	96	55	21	74	132	152
HGLibA_01538	ALDH18A1	97	55	181	100	29	120	299	247
HGLibA_01539	ALDH18A1	140	45	54	100	12	73	104	74
HGLibA_01540	ALDH1A1	28	18	111	20	3	63	149	152
HGLibA_01541	ALDH1A1	143	101	92	75	48	61	224	149
HGLibA_01542	ALDH1A1	141	74	59	85	70	54	154	139
HGLibA_01543	ALDH1A2	16	29	22	45	4	28	71	67
HGLibA_01544	ALDH1A2	95	141	102	145	41	134	259	181
HGLibA_01545	ALDH1A2	270	245	209	259	62	173	490	471
HGLibA_01546	ALDH1A3	31	19	15	46	11	26	95	77
HGLibA_01547	ALDH1A3	184	189	33	129	195	117	256	152
HGLibA_01548	ALDH1A3	72	57	135	82	11	148	303	283
HGLibA_01549	ALDH1B1	28	24	38	38	10	14	101	88
HGLibA_01550	ALDH1B1	114	72	207	80	24	106	260	205
HGLibA_01551	ALDH1B1	192	154	146	168	98	108	460	195
HGLibA_01552	ALDH1L1	199	168	169	122	35	202	326	228
HGLibA_01553	ALDH1L1	33	44	41	40	5	29	114	86
HGLibA_01554	ALDH1L1	197	173	101	205	123	63	340	304
HGLibA_01555	ALDH1L2	74	53	167	62	12	116	279	244
HGLibA_01556	ALDH1L2	182	121	207	149	28	148	221	224
HGLibA_01557	ALDH1L2	54	60	93	53	17	159	201	107
HGLibA_01558	ALDH2	44	51	11	24	50	39	99	131
HGLibA_01559	ALDH2	6	23	0	24	0	4	25	13
HGLibA_01560	ALDH2	132	236	103	239	36	124	237	288
HGLibA_01561	ALDH3A1	135	80	159	102	20	128	199	158
HGLibA_01562	ALDH3A1	81	87	54	36	27	64	102	134
HGLibA_01563	ALDH3A1	56	51	73	49	19	85	106	95
HGLibA_01564	ALDH3A2	275	349	148	257	177	374	453	439
HGLibA_01565	ALDH3A2	188	49	180	80	76	42	252	167
HGLibA_01566	ALDH3A2	171	171	136	113	80	201	357	320
HGLibA_01567	ALDH3B1	138	96	195	93	41	132	422	406
HGLibA_01568	ALDH3B1	0	0	0	0	0	0	0	4
HGLibA_01569	ALDH3B1	194	245	112	137	125	81	300	218
HGLibA_01570	ALDH3B2	92	127	88	140	28	58	88	90
HGLibA_01571	ALDH3B2	175	192	133	277	92	187	567	418
HGLibA_01572	ALDH3B2	77	120	44	165	126	44	281	196
HGLibA_01573	ALDH4A1	250	208	166	251	98	161	328	321
HGLibA_01574	ALDH4A1	74	47	83	86	33	67	155	207
HGLibA_01575	ALDH4A1	88	132	142	36	62	35	92	141
HGLibA_01576	ALDH5A1	55	49	70	56	8	85	131	145
HGLibA_01577	ALDH5A1	52	58	25	72	36	44	112	78
HGLibA_01578	ALDH5A1	154	35	73	26	127	62	146	106
HGLibA_01579	ALDH6A1	113	65	105	86	24	105	255	151
HGLibA_01580	ALDH6A1	100	96	76	72	6	81	249	150
HGLibA_01581	ALDH6A1	71	39	105	62	8	100	307	234
HGLibA_01582	ALDH7A1	122	113	141	155	63	86	423	291
HGLibA_01583	ALDH7A1	22	3	47	38	4	11	83	25
HGLibA_01584	ALDH7A1	74	29	84	83	9	48	297	290
HGLibA_01585	ALDH8A1	139	186	137	262	79	108	265	218
HGLibA_01586	ALDH8A1	233	161	253	228	104	49	236	285
HGLibA_01587	ALDH8A1	71	129	34	110	40	34	101	116
HGLibA_01588	ALDH9A1	79	69	84	69	25	87	158	167
HGLibA_01589	ALDH9A1	34	11	40	47	2	27	60	86
HGLibA_01590	ALDH9A1	135	58	53	106	87	43	192	86
HGLibA_01591	ALDOA	40	25	1	31	1	6	192	142
HGLibA_01592	ALDOA	55	26	21	21	23	14	471	489
HGLibA_01593	ALDOA	60	29	111	35	27	28	183	217
HGLibA_01594	ALDOB	97	84	146	199	26	133	478	458
HGLibA_01595	ALDOB	296	371	182	339	246	224	429	456
HGLibA_01596	ALDOB	53	72	44	57	12	126	201	227
HGLibA_01597	ALDOC	178	151	109	57	39	94	368	264
HGLibA_01598	ALDOC	311	273	124	162	209	125	408	348
HGLibA_01599	ALDOC	60	77	69	89	16	101	165	185
HGLibA_01600	ALG1	81	106	31	24	17	62	192	165
HGLibA_01601	ALG1	94	20	36	32	97	26	173	194
HGLibA_01602	ALG1	45	60	34	102	20	11	181	149
HGLibA_01603	ALG10	154	248	93	142	99	133	362	450
HGLibA_01604	ALG10	26	5	17	18	1	52	199	90
HGLibA_01605	ALG10	52	14	45	49	1	23	84	87
HGLibA_01606	ALG10B	47	82	31	96	22	90	100	113
HGLibA_01607	ALG10B	266	292	244	195	110	251	470	444
HGLibA_01608	ALG10B	99	69	123	63	16	116	226	163
HGLibA_01609	ALG11	17	2	1	11	3	13	96	102
HGLibA_01610	ALG11	3	3	11	3	1	25	205	98
HGLibA_01611	ALG11	58	21	66	30	19	0	116	106
HGLibA_01612	ALG12	208	167	131	183	55	139	329	284
HGLibA_01613	ALG12	105	204	90	205	34	150	240	189
HGLibA_01614	ALG12	73	37	94	41	22	23	158	135
HGLibA_01615	ALG13	114	41	77	74	22	31	279	191
HGLibA_01616	ALG13	41	9	103	22	18	6	228	123
HGLibA_01617	ALG13	39	27	134	45	5	104	238	178
HGLibA_01618	ALG14	48	81	64	91	123	42	172	183
HGLibA_01619	ALG14	1	4	3	2	0	5	21	47
HGLibA_01620	ALG14	95	75	61	136	36	44	189	103
HGLibA_01621	ALG1L	38	49	97	41	11	118	149	112
HGLibA_01622	ALG1L	48	21	33	30	16	29	178	107
HGLibA_01623	ALG1L	127	56	136	89	15	109	316	239
HGLibA_01624	ALG2	69	27	65	37	85	46	547	489
HGLibA_01625	ALG2	31	8	12	4	18	9	162	105
HGLibA_01626	ALG2	86	40	43	75	27	46	228	212
HGLibA_01627	ALG3	119	86	74	25	113	27	191	122
HGLibA_01628	ALG3	82	102	95	64	15	57	119	77
HGLibA_01629	ALG3	83	34	64	85	18	51	196	83
HGLibA_01630	ALG5	86	24	203	40	13	122	287	277
HGLibA_01631	ALG5	69	45	44	72	18	110	227	177
HGLibA_01632	ALG5	30	23	9	40	2	5	67	84
HGLibA_01633	ALG6	125	65	249	125	11	205	325	288
HGLibA_01634	ALG6	112	99	56	69	131	58	258	197
HGLibA_01635	ALG6	112	111	85	95	65	98	198	277
HGLibA_01636	ALG8	54	77	90	72	10	126	267	184
HGLibA_01637	ALG8	94	36	83	42	22	30	206	127
HGLibA_01638	ALG8	104	83	172	163	28	149	377	272
HGLibA_01639	ALG9	116	65	156	194	25	185	359	304
HGLibA_01640	ALG9	50	36	41	75	3	43	127	140
HGLibA_01641	ALG9	8	0	24	0	0	0	13	0
HGLibA_01642	ALK	278	222	226	225	72	281	516	496
HGLibA_01643	ALK	36	41	47	60	10	50	131	153
HGLibA_01644	ALK	124	114	88	102	36	96	240	243
HGLibA_01645	ALKBH1	298	199	267	248	107	158	468	384
HGLibA_01646	ALKBH1	75	78	68	49	52	52	176	121
HGLibA_01647	ALKBH1	125	52	115	102	15	102	322	258
HGLibA_01648	ALKBH2	223	88	85	46	181	68	113	112
HGLibA_01649	ALKBH2	106	72	101	61	81	98	232	158
HGLibA_01650	ALKBH2	149	122	204	96	37	114	248	227
HGLibA_01651	ALKBH3	84	128	119	66	55	156	232	180
HGLibA_01652	ALKBH3	177	153	211	164	32	114	342	307
HGLibA_01653	ALKBH3	107	77	76	88	21	92	227	181
HGLibA_01654	ALKBH4	95	126	80	60	61	73	226	83
HGLibA_01655	ALKBH4	79	87	95	100	36	84	224	224
HGLibA_01656	ALKBH4	107	79	81	179	13	44	266	184
HGLibA_01657	ALKBH5	114	139	79	191	72	74	216	163
HGLibA_01658	ALKBH5	78	96	97	123	19	33	317	289
HGLibA_01659	ALKBH5	74	45	49	83	26	5	115	99
HGLibA_01660	ALKBH6	158	290	156	291	68	143	444	273
HGLibA_01661	ALKBH6	214	252	66	134	93	75	225	221
HGLibA_01662	ALKBH6	67	50	66	59	8	62	132	119
HGLibA_01663	ALKBH7	80	117	84	68	39	134	186	171
HGLibA_01664	ALKBH7	99	66	112	71	47	90	204	140
HGLibA_01665	ALKBH7	81	80	90	88	21	114	226	303
HGLibA_01666	ALKBH8	110	176	129	139	50	95	246	271
HGLibA_01667	ALKBH8	164	129	180	114	41	169	262	253
HGLibA_01668	ALKBH8	7	6	36	8	3	46	136	105
HGLibA_01669	ALLC	98	98	142	86	82	162	368	198
HGLibA_01670	ALLC	55	31	73	85	7	78	201	176
HGLibA_01671	ALLC	9	6	6	8	1	4	17	24
HGLibA_01672	ALMS1	109	74	163	78	69	84	425	302
HGLibA_01673	ALMS1	273	174	161	145	80	137	462	328
HGLibA_01674	ALMS1	8	14	5	33	1	45	44	52
HGLibA_01675	ALOX12	153	98	88	58	104	65	186	166
HGLibA_01676	ALOX12	439	352	137	328	281	198	386	353
HGLibA_01677	ALOX12	192	160	132	241	94	112	235	179
HGLibA_01678	ALOX12B	117	103	113	133	15	108	166	218
HGLibA_01679	ALOX12B	124	59	82	75	13	78	263	192
HGLibA_01680	ALOX12B	223	184	158	135	80	129	272	190
HGLibA_01681	ALOX15	28	9	20	49	17	22	77	42
HGLibA_01682	ALOX15	106	153	86	61	87	99	157	115
HGLibA_01683	ALOX15	158	77	173	71	47	141	309	236
HGLibA_01684	ALOX15B	112	99	224	112	26	92	249	219
HGLibA_01685	ALOX15B	33	18	58	50	2	101	254	212
HGLibA_01686	ALOX15B	209	101	156	93	50	130	306	332
HGLibA_01687	ALOX5	39	121	63	145	20	137	222	181
HGLibA_01688	ALOX5	19	16	5	11	20	37	39	65
HGLibA_01689	ALOX5	78	21	26	42	28	31	122	134
HGLibA_01690	ALOX5AP	107	49	50	81	13669	93	203	146
HGLibA_01691	ALOX5AP	57	36	40	63	18	37	92	70
HGLibA_01692	ALOX5AP	193	233	118	204	119	128	297	263
HGLibA_01693	ALOXE3	42	28	42	64	14	24	39	79
HGLibA_01694	ALOXE3	60	44	103	125	8	72	198	121
HGLibA_01695	ALOXE3	134	335	157	151	37	181	289	291
HGLibA_01696	ALPI	176	202	252	330	147	175	302	334
HGLibA_01697	ALPI	69	84	66	98	11	70	114	155
HGLibA_01698	ALPI	352	249	178	230	155	306	593	483
HGLibA_01699	ALPK1	154	85	28	140	63	105	232	224
HGLibA_01700	ALPK1	194	114	92	75	50	119	190	205
HGLibA_01701	ALPK1	96	30	83	30	30	69	316	193
HGLibA_01702	ALPK2	136	54	125	72	30	79	215	211
HGLibA_01703	ALPK2	94	65	122	66	11	27	192	188
HGLibA_01704	ALPK2	75	25	76	42	16	56	156	119
HGLibA_01705	ALPK3	10	31	8	11	1	6	18	17
HGLibA_01706	ALPK3	118	111	74	118	54	67	241	227
HGLibA_01707	ALPK3	49	14	58	11	15	6	53	46
HGLibA_01708	ALPL	130	69	96	72	49	115	147	149
HGLibA_01709	ALPL	93	90	104	73	14	56	176	122
HGLibA_01710	ALPL	87	14	161	24	19	15	111	76
HGLibA_01711	ALPP	389	225	315	396	100	312	527	734
HGLibA_01712	ALPP	174	161	93	120	102	55	141	114
HGLibA_01713	ALPP	148	81	147	66	36	86	293	188
HGLibA_01714	ALPPL2	84	104	24	93	28	68	116	124
HGLibA_01715	ALPPL2	100	57	70	78	45	24	106	86
HGLibA_01716	ALPPL2	218	90	64	76	262	60	179	150
HGLibA_01717	ALS2	126	81	210	96	23	118	365	332
HGLibA_01718	ALS2	120	175	94	149	38	83	214	275
HGLibA_01719	ALS2	48	28	25	22	5	77	65	65
HGLibA_01720	ALS2CL	132	131	115	157	79	60	244	173
HGLibA_01721	ALS2CL	213	188	161	127	84	131	268	253
HGLibA_01722	ALS2CL	421	375	332	418	103	278	606	398
HGLibA_01723	ALS2CR11	58	43	33	81	5	57	292	158
HGLibA_01724	ALS2CR11	53	34	47	64	12	124	197	197
HGLibA_01725	ALS2CR11	272	129	181	96	126	114	288	254
HGLibA_01726	ALS2CR12	35	28	42	33	5	31	93	89
HGLibA_01727	ALS2CR12	100	45	97	43	39	45	169	134
HGLibA_01728	ALS2CR12	170	93	158	118	22	109	295	238
HGLibA_01729	ALS2CR8	159	142	167	152	43	263	413	326
HGLibA_01730	ALS2CR8	49	18	86	42	10	70	213	149
HGLibA_01731	ALS2CR8	34	15	64	31	5	57	181	142
HGLibA_01732	ALX1	93	26	19	37	134	29	74	52
HGLibA_01733	ALX1	146	99	66	146	106	86	174	190
HGLibA_01734	ALX1	122	114	133	117	33	92	201	144
HGLibA_01735	ALX3	67	89	52	108	51	75	120	135
HGLibA_01736	ALX3	64	113	62	97	25	68	244	118
HGLibA_01737	ALX3	126	97	159	157	53	137	210	248
HGLibA_01738	ALX4	144	132	83	120	82	68	207	115
HGLibA_01739	ALX4	103	52	82	53	62	59	150	110
HGLibA_01740	ALX4	37	77	10	53	8	41	64	66
HGLibA_01741	ALYREF	31	21	47	20	1	45	130	97
HGLibA_01742	ALYREF	83	76	178	127	28	93	218	165
HGLibA_01743	ALYREF	110	44	118	154	46	99	245	158
HGLibA_01744	AMACR	96	45	62	41	21	82	141	147
HGLibA_01745	AMACR	74	51	27	70	25	10	128	104
HGLibA_01746	AMACR	99	121	113	114	40	153	108	223
HGLibA_01747	AMBN	54	63	12	36	11	82	150	111
HGLibA_01748	AMBN	86	67	75	41	17	11	76	83
HGLibA_01749	AMBN	104	93	140	137	30	110	339	199
HGLibA_01750	AMBP	225	234	116	181	186	156	333	211
HGLibA_01751	AMBP	158	151	81	127	144	112	166	142
HGLibA_01752	AMBP	79	94	74	48	5	85	148	55
HGLibA_01753	AMBRA1	51	56	89	53	3	88	115	112
HGLibA_01754	AMBRA1	47	30	45	61	12	77	97	85
HGLibA_01755	AMBRA1	141	98	179	159	27	92	319	326
HGLibA_01756	AMD1	172	165	100	90	85	152	303	259
HGLibA_01757	AMD1	97	48	112	71	7	79	301	151
HGLibA_01758	AMD1	10	12	31	21	2	19	127	84
HGLibA_01759	AMDHD1	85	42	39	104	121	42	155	82
HGLibA_01760	AMDHD1	291	246	178	296	206	123	405	280
HGLibA_01761	AMDHD1	54	22	67	40	8	81	124	149
HGLibA_01762	AMDHD2	273	185	144	185	228	91	244	233
HGLibA_01763	AMDHD2	126	43	63	49	61	86	307	200
HGLibA_01764	AMDHD2	113	114	94	116	68	102	269	183
HGLibA_01765	AMELX	138	66	94	33	30	72	169	95
HGLibA_01766	AMELX	270	303	159	199	91	231	430	295
HGLibA_01767	AMELX	58	14	51	37	1	23	65	89
HGLibA_01768	AMELY	7	13	0	7	0	23	11	28
HGLibA_01769	AMELY	91	142	80	110	33	140	112	94
HGLibA_01770	AMELY	164	210	158	221	46	151	290	228
HGLibA_01771	AMER1	193	169	103	124	51	160	280	200
HGLibA_01772	AMER1	39	47	73	38	2	28	168	106
HGLibA_01773	AMER1	241	171	170	128	91	181	341	359
HGLibA_01774	AMER2	267	139	90	178	117	143	341	160
HGLibA_01775	AMER2	143	71	65	24	68	30	145	104
HGLibA_01776	AMER2	150	134	36	46	202	49	197	154
HGLibA_01777	AMER3	30	9	6	14	12	25	42	25
HGLibA_01778	AMER3	48	44	4	23	62	27	95	102
HGLibA_01779	AMER3	29	8	41	13	4	11	34	19
HGLibA_01780	AMFR	26	16	43	49	9	3	46	32
HGLibA_01781	AMFR	36	18	11	10	0	0	28	6
HGLibA_01782	AMFR	57	44	29	51	9	67	72	118
HGLibA_01783	AMH	140	81	173	100	82	93	241	152
HGLibA_01784	AMH	71	88	48	59	16	64	118	70
HGLibA_01785	AMH	93	139	74	115	91	115	315	202
HGLibA_01786	AMHR2	74	29	53	28	28	45	173	71
HGLibA_01787	AMHR2	256	621	176	535	168	394	662	568
HGLibA_01788	AMHR2	218	207	186	157	55	126	285	223
HGLibA_01789	AMICA1	285	184	210	118	43	124	390	351
HGLibA_01790	AMICA1	63	28	9	61	22	15	95	51
HGLibA_01791	AMICA1	95	165	90	130	52	41	152	232
HGLibA_01792	AMIGO1	141	80	175	119	48	159	226	181
HGLibA_01793	AMIGO1	113	95	39	63	52	81	163	146
HGLibA_01794	AMIGO1	14	42	5	25	5	31	34	37
HGLibA_01795	AMIGO2	214	271	90	174	122	154	264	237
HGLibA_01796	AMIGO2	100	136	66	110	117	83	184	163
HGLibA_01797	AMIGO2	52	18	38	31	8	22	113	89
HGLibA_01798	AMIGO3	280	168	99	180	215	168	266	141
HGLibA_01799	AMIGO3	61	81	107	54	5	105	173	103
HGLibA_01800	AMIGO3	266	283	164	184	226	171	324	324
HGLibA_01801	AMMECR1	289	349	181	248	270	251	388	445
HGLibA_01802	AMMECR1	10	10	19	30	4	13	61	50
HGLibA_01803	AMMECR1	88	68	108	55	26	151	298	210
HGLibA_01804	AMMECR1L	165	155	103	95	63	104	260	198
HGLibA_01805	AMMECR1L	66	66	63	60	15	12	124	87
HGLibA_01806	AMMECR1L	16	10	20	7	1	12	42	55
HGLibA_01807	AMN	36	74	50	59	36	68	146	120
HGLibA_01808	AMN	247	175	132	149	193	119	230	189
HGLibA_01809	AMN	264	82	17	111	13052	81	140	145
HGLibA_01810	AMN1	45	27	84	53	6	63	137	113
HGLibA_01811	AMN1	60	71	111	92	13	99	197	170
HGLibA_01812	AMN1	78	31	118	42	21	100	284	219
HGLibA_01813	AMOT	134	203	55	79	28	164	233	200
HGLibA_01814	AMOT	107	101	177	113	33	224	581	407
HGLibA_01815	AMOT	87	50	110	94	13	95	78	83
HGLibA_01816	AMOTL1	107	107	49	24	41	48	134	105
HGLibA_01817	AMOTL1	72	103	39	102	13	65	136	173
HGLibA_01818	AMOTL1	305	299	197	258	161	264	388	233
HGLibA_01819	AMOTL2	265	334	212	207	85	156	458	363
HGLibA_01820	AMOTL2	23	6	34	7	5	38	56	37
HGLibA_01821	AMOTL2	22	22	6	8	3	31	36	15
HGLibA_01822	AMPD1	118	143	122	145	42	141	340	316
HGLibA_01823	AMPD1	38	13	165	22	11	39	203	216
HGLibA_01824	AMPD1	56	30	232	45	0	95	361	277
HGLibA_01825	AMPD2	122	53	102	91	14	21	174	140
HGLibA_01826	AMPD2	66	23	92	49	6	32	128	107
HGLibA_01827	AMPD2	163	122	138	102	21	148	318	199
HGLibA_01828	AMPD3	89	76	185	77	33	99	252	183
HGLibA_01829	AMPD3	9	6	11	8	0	12	61	83
HGLibA_01830	AMPD3	136	168	121	183	37	83	328	295
HGLibA_01831	AMPH	90	38	118	47	58	97	163	188
HGLibA_01832	AMPH	201	165	98	95	131	117	325	239
HGLibA_01833	AMPH	41	40	53	75	21	50	161	122
HGLibA_01834	AMT	84	348	84	204	72	86	98	243
HGLibA_01835	AMT	16	62	2	58	0	29	37	63
HGLibA_01836	AMT	225	69	174	60	165	84	105	85
HGLibA_01837	AMTN	74	37	61	14	39	25	73	103
HGLibA_01838	AMTN	72	48	27	95	8	108	248	192
HGLibA_01839	AMTN	51	124	104	107	41	147	231	197
HGLibA_01840	AMY1A	56	29	172	76	8	181	188	209
HGLibA_01841	AMY1A	253	227	406	380	91	359	440	432
HGLibA_01842	AMY1A	12	16	101	20	4	101	135	109
HGLibA_01845	AMY1B	191	131	365	263	48	252	42	19
HGLibA_01846	AMY1C	62	31	66	34	16	40	246	177
HGLibA_01847	AMY1C	61	23	188	23	7	91	228	239
HGLibA_01849	AMY2A	42	34	79	41	3	80	197	117
HGLibA_01851	AMY2A	48	17	294	61	4	115	316	244
HGLibA_01852	AMY2B	55	27	86	52	22	27	78	73
HGLibA_01853	AMY2B	28	20	68	45	1	55	177	146
HGLibA_01854	AMY2B	156	104	163	62	27	103	284	279
HGLibA_01855	AMZ1	247	219	199	167	116	184	413	326
HGLibA_01856	AMZ1	122	92	76	117	178	44	119	190
HGLibA_01857	AMZ1	83	133	88	123	65	103	252	234
HGLibA_01858	AMZ2	16	3	7	8	11	14	76	60
HGLibA_01859	AMZ2	47	32	78	23	26	17	142	98
HGLibA_01860	AMZ2	195	170	251	185	68	158	296	328
HGLibA_01861	ANAPC1	48	34	116	51	11	87	213	202
HGLibA_01862	ANAPC1	3	10	28	12	0	42	87	108
HGLibA_01863	ANAPC1	46	21	86	17	5	50	154	118
HGLibA_01864	ANAPC10	29	27	50	75	4	52	237	166
HGLibA_01865	ANAPC10	26	10	39	35	9	24	192	141
HGLibA_01866	ANAPC10	145	97	105	108	27	108	245	237
HGLibA_01867	ANAPC11	43	61	101	97	3	15	392	328
HGLibA_01868	ANAPC11	0	24	0	8	0	7	37	27
HGLibA_01869	ANAPC11	231	211	80	156	186	85	269	256
HGLibA_01870	ANAPC13	170	73	143	121	39	135	425	385
HGLibA_01871	ANAPC13	14	18	48	45	6	22	184	146
HGLibA_01872	ANAPC13	69	54	57	41	4	92	267	227
HGLibA_01873	ANAPC15	193	201	212	254	51	273	364	396
HGLibA_01874	ANAPC15	96	109	65	59	36	54	331	273
HGLibA_01875	ANAPC15	43	55	42	32	14	37	207	159
HGLibA_01876	ANAPC16	22	14	62	24	18	25	44	52
HGLibA_01877	ANAPC16	21	21	42	24	1	54	216	107
HGLibA_01878	ANAPC16	52	64	62	32	23	18	51	48
HGLibA_01879	ANAPC2	157	164	120	129	123	103	276	295
HGLibA_01880	ANAPC2	18	0	40	11	0	3	20	20
HGLibA_01881	ANAPC2	32	16	39	30	4	62	266	227
HGLibA_01882	ANAPC4	9	17	15	22	2	18	167	188
HGLibA_01883	ANAPC4	21	9	5	24	11	9	105	118
HGLibA_01884	ANAPC4	158	62	186	87	65	79	323	143
HGLibA_01885	ANAPC5	0	13	0	7	0	0	14	15
HGLibA_01886	ANAPC5	318	141	186	158	110	178	447	490
HGLibA_01887	ANAPC5	130	61	44	36	37	40	416	399
HGLibA_01888	ANAPC7	121	164	76	73	61	98	174	139
HGLibA_01889	ANAPC7	185	70	83	89	43	120	298	246
HGLibA_01890	ANAPC7	93	103	139	137	45	123	135	149
HGLibA_01891	ANG	61	51	60	111	46	22	140	157
HGLibA_01892	ANG	59	48	192	49	15	105	212	189
HGLibA_01893	ANG	50	96	155	76	31	76	221	149
HGLibA_01894	ANGEL1	63	45	62	52	6	62	211	147
HGLibA_01895	ANGEL1	14	12	65	52	10	36	110	75
HGLibA_01896	ANGEL1	275	187	214	145	129	67	326	182
HGLibA_01897	ANGEL2	69	50	55	88	37	26	88	96
HGLibA_01898	ANGEL2	74	41	22	70	60	91	85	118
HGLibA_01899	ANGEL2	60	31	61	37	5	58	132	100
HGLibA_01900	ANGPT1	16	5	17	2	4	13	36	39
HGLibA_01901	ANGPT1	113	59	48	114	82	72	269	146
HGLibA_01902	ANGPT1	166	92	89	51	37	82	129	114
HGLibA_01903	ANGPT2	40	75	62	63	23	108	239	182
HGLibA_01904	ANGPT2	11	50	39	52	3	74	102	112
HGLibA_01905	ANGPT2	287	182	220	196	79	139	353	225
HGLibA_01906	ANGPT4	64	103	82	68	68	47	113	125
HGLibA_01907	ANGPT4	197	160	178	149	96	70	168	156
HGLibA_01908	ANGPT4	16	36	6	36	5	13	141	125
HGLibA_01909	ANGPTL1	154	96	272	178	42	331	737	583
HGLibA_01910	ANGPTL1	17	25	20	18	4	33	90	98
HGLibA_01911	ANGPTL1	44	24	64	20	10	29	153	97
HGLibA_01912	ANGPTL2	119	134	89	114	28	183	233	248
HGLibA_01913	ANGPTL2	319	216	225	270	128	213	595	400
HGLibA_01914	ANGPTL2	75	45	45	51	12	57	174	101
HGLibA_01915	ANGPTL3	2	27	13	4	14	15	42	60
HGLibA_01916	ANGPTL3	78	72	64	83	19	134	312	216
HGLibA_01917	ANGPTL3	5	24	12	41	1	36	41	75
HGLibA_01918	ANGPTL4	120	46	163	61	20	96	266	153
HGLibA_01919	ANGPTL4	64	88	48	62	62	38	181	61
HGLibA_01920	ANGPTL4	147	197	99	165	55	90	311	201
HGLibA_01921	ANGPTL5	89	77	112	96	10	141	331	275
HGLibA_01922	ANGPTL5	1	0	12	5	4	31	64	20
HGLibA_01923	ANGPTL5	32	31	14	33	1	94	91	67
HGLibA_01924	ANGPTL6	147	141	145	109	67	110	380	350
HGLibA_01925	ANGPTL6	251	158	233	183	84	109	226	249
HGLibA_01926	ANGPTL6	106	33	91	60	27	14	163	134
HGLibA_01927	ANGPTL7	19	27	26	44	19	35	57	90
HGLibA_01928	ANGPTL7	63	40	13	97	5	79	139	81
HGLibA_01929	ANGPTL7	123	106	109	86	43	30	253	209
HGLibA_01930	ANHX	372	222	325	256	115	186	557	425
HGLibA_01931	ANHX	112	44	88	57	34	43	214	138
HGLibA_01932	ANHX	127	117	128	124	37	154	200	218
HGLibA_01933	ANK1	111	69	69	61	33	111	218	174
HGLibA_01934	ANK1	8	25	19	14	0	35	10	53
HGLibA_01935	ANK1	85	59	61	73	24	96	178	200
HGLibA_01936	ANK2	259	219	144	212	153	159	458	333
HGLibA_01937	ANK2	263	129	190	176	44	203	316	317
HGLibA_01938	ANK2	104	48	42	87	11	64	117	166
HGLibA_01939	ANK3	152	89	244	108	45	169	278	229
HGLibA_01940	ANK3	393	361	204	337	212	246	507	539
HGLibA_01941	ANK3	89	63	194	91	20	90	322	246
HGLibA_01942	ANKAR	77	46	92	124	31	38	111	112
HGLibA_01943	ANKAR	24	32	38	38	6	74	79	116
HGLibA_01944	ANKAR	235	176	321	187	123	203	577	455
HGLibA_01945	ANKDD1A	60	60	33	72	21	102	219	144
HGLibA_01946	ANKDD1A	93	73	42	72	13	87	226	221
HGLibA_01947	ANKDD1A	38	36	23	33	38	18	105	81
HGLibA_01948	ANKDD1B	169	158	114	142	67	119	282	273
HGLibA_01949	ANKDD1B	310	200	233	223	73	230	545	422
HGLibA_01950	ANKDD1B	48	71	104	35	16	73	85	110
HGLibA_01951	ANKEF1	130	113	38	120	61	91	175	151
HGLibA_01952	ANKEF1	183	212	115	183	43	190	317	347
HGLibA_01953	ANKEF1	96	89	36	50	68	22	182	60
HGLibA_01954	ANKFN1	97	68	71	81	21	22	130	111
HGLibA_01955	ANKFN1	46	24	57	39	7	45	146	80
HGLibA_01956	ANKFN1	279	201	225	221	68	252	520	432
HGLibA_01957	ANKFY1	195	164	180	187	79	86	285	232
HGLibA_01958	ANKFY1	56	78	66	86	23	61	169	117
HGLibA_01959	ANKFY1	17	30	25	8	3	25	98	75
HGLibA_01960	ANKH	265	169	187	253	97	160	281	198
HGLibA_01961	ANKH	236	177	147	234	81	133	238	281
HGLibA_01962	ANKH	164	248	96	152	69	158	266	233
HGLibA_01963	ANKHD1	67	27	60	48	14	55	254	244
HGLibA_01964	ANKHD1	162	53	111	46	30	100	250	128
HGLibA_01965	ANKHD1	39	44	28	28	5	47	58	77
HGLibA_01966	ANKHD1-EIF4EBP3	124	63	63	91	81	63	171	147
HGLibA_01968	ANKHD1-EIF4EBP3	149	103	100	95	36	158	312	329
HGLibA_01969	ANKIB1	62	41	31	36	16	40	175	135
HGLibA_01970	ANKIB1	49	23	90	30	9	93	177	236
HGLibA_01971	ANKIB1	163	113	244	93	48	221	413	390
HGLibA_01972	ANKK1	85	109	99	146	56	79	219	171
HGLibA_01973	ANKK1	32	67	26	72	6	51	113	83
HGLibA_01974	ANKK1	474	284	263	332	159	235	535	343
HGLibA_01975	ANKLE2	104	98	143	127	16	168	397	255
HGLibA_01976	ANKLE2	11	0	10	2	20	0	76	72
HGLibA_01977	ANKLE2	31	33	35	44	1	30	185	170
HGLibA_01978	ANKMY1	78	59	48	31	92	34	89	109
HGLibA_01979	ANKMY1	200	169	50	181	84	129	225	188
HGLibA_01980	ANKMY1	150	84	211	127	78	114	306	316
HGLibA_01981	ANKMY2	5	14	26	7	2	18	78	92
HGLibA_01982	ANKMY2	102	64	143	68	15	137	210	270
HGLibA_01983	ANKMY2	61	96	61	56	16	99	274	179
HGLibA_01984	ANKRA2	215	169	162	175	117	129	308	385
HGLibA_01985	ANKRA2	114	89	115	110	54	58	189	192
HGLibA_01986	ANKRA2	205	116	151	188	45	193	677	447
HGLibA_01987	ANKRD1	81	25	109	47	11	92	140	160
HGLibA_01988	ANKRD1	209	169	108	210	75	164	312	332
HGLibA_01989	ANKRD1	216	42	180	63	33	41	266	255
HGLibA_01990	ANKRD10	22	45	6	47	14	32	56	28
HGLibA_01991	ANKRD10	322	257	173	178	191	168	416	442
HGLibA_01992	ANKRD10	248	254	151	227	127	205	439	284
HGLibA_01993	ANKRD11	79	24	61	27	40	46	142	135
HGLibA_01994	ANKRD11	147	105	33	19	96	107	126	160
HGLibA_01995	ANKRD11	1	14	3	12	2	4	66	11
HGLibA_01996	ANKRD12	29	11	65	17	6	78	79	51
HGLibA_01997	ANKRD12	43	34	74	22	8	33	119	89
HGLibA_01998	ANKRD12	84	94	137	139	48	90	200	236
HGLibA_01999	ANKRD13A	131	120	101	57	27	112	247	189
HGLibA_02000	ANKRD13A	11	11	41	28	2	32	174	174
HGLibA_02001	ANKRD13A	198	217	137	205	33	236	346	268
HGLibA_02002	ANKRD13B	166	118	66	108	22	115	173	140
HGLibA_02003	ANKRD13B	45	58	10	54	55	14	85	28
HGLibA_02004	ANKRD13B	206	187	98	121	156	77	170	173
HGLibA_02005	ANKRD13C	153	72	121	82	43	76	283	176
HGLibA_02006	ANKRD13C	286	383	280	329	189	229	548	366
HGLibA_02007	ANKRD13C	9	6	73	10	2	25	85	59
HGLibA_02008	ANKRD13D	14	19	0	14	9	2	26	29
HGLibA_02009	ANKRD13D	43	33	44	46	33	28	59	115
HGLibA_02010	ANKRD13D	139	95	78	77	75	65	190	211
HGLibA_02011	ANKRD16	479	422	220	286	437	111	325	275
HGLibA_02012	ANKRD16	117	71	87	70	40	71	218	183
HGLibA_02013	ANKRD16	64	129	96	121	27	147	137	149
HGLibA_02014	ANKRD17	58	19	23	11	7	37	145	90
HGLibA_02015	ANKRD17	232	178	207	172	49	122	467	416
HGLibA_02016	ANKRD17	36	34	9	37	1	30	140	88
HGLibA_02017	ANKRD18A	298	292	216	273	132	193	403	377
[truncated: 118,794 more rows]
