# Supplementary material for: Ubiquitin ligase STUB1 destabilizes IFNγ-receptor complex to suppress tumor IFNγ signaling
Source: Nat Commun. 2022 Apr 8;13:1923. doi: 10.1038/s41467-022-29442-x (PMC8993893; doi:10.1038/s41467-022-29442-x)
Supplement: Supplementary file 6 — Supplementary Data 2 [file 41467_2022_29442_MOESM6_ESM.xlsx]

## Sheet: Supplementary Data_2_ Screen SK
name	gene	bulk1	bulk2	t0	neg1	neg2	pos1	pos2
HGLibA_00001	A1BG	283	203	199	191	205	188	113
HGLibA_00002	A1BG	115	12	41	112	46	71	117
HGLibA_00003	A1BG	370	249	393	234	305	225	149
HGLibA_00004	A1CF	76	42	86	40	41	29	39
HGLibA_00005	A1CF	65	117	142	101	132	112	93
HGLibA_00006	A1CF	83	129	289	127	156	74	66
HGLibA_00007	A2M	28	96	346	146	101	108	123
HGLibA_00008	A2M	217	67	92	50	120	203	116
HGLibA_00009	A2M	192	108	184	136	86	62	118
HGLibA_00010	A2ML1	108	151	218	115	142	126	171
HGLibA_00011	A2ML1	261	293	652	422	190	310	220
HGLibA_00012	A2ML1	135	91	222	92	183	48	106
HGLibA_00013	A3GALT2	26	24	48	20	25	35	56
HGLibA_00014	A3GALT2	298	107	441	79	179	133	77
HGLibA_00015	A3GALT2	61	87	89	53	90	91	25
HGLibA_00016	A4GALT	249	315	851	259	192	194	286
HGLibA_00017	A4GALT	326	183	620	165	100	217	248
HGLibA_00018	A4GALT	360	219	611	194	210	282	134
HGLibA_00019	A4GNT	196	157	378	149	160	159	216
HGLibA_00020	A4GNT	43	31	169	0	0	42	56
HGLibA_00021	A4GNT	149	182	285	204	247	126	123
HGLibA_00022	AAAS	102	116	221	88	158	157	128
HGLibA_00023	AAAS	104	28	25	45	97	79	66
HGLibA_00024	AAAS	58	10	115	39	0	14	30
HGLibA_00025	AACS	137	54	189	145	82	69	116
HGLibA_00026	AACS	78	152	169	62	93	69	71
HGLibA_00027	AACS	108	101	288	60	85	109	96
HGLibA_00028	AADAC	66	213	465	178	163	81	125
HGLibA_00029	AADAC	71	14	15	58	56	50	37
HGLibA_00030	AADAC	61	51	185	31	104	55	67
HGLibA_00031	AADACL2	66	75	272	75	59	81	79
HGLibA_00032	AADACL2	226	233	254	102	187	201	123
HGLibA_00033	AADACL2	192	183	361	83	166	122	77
HGLibA_00034	AADACL3	72	58	531	65	62	161	87
HGLibA_00035	AADACL3	31	60	168	73	137	24	105
HGLibA_00036	AADACL3	0	27	92	7	49	110	64
HGLibA_00037	AADACL4	84	74	159	104	92	110	70
HGLibA_00038	AADACL4	322	97	205	41	65	127	99
HGLibA_00039	AADACL4	175	109	489	49	84	124	162
HGLibA_00040	AADAT	282	282	533	236	287	258	227
HGLibA_00041	AADAT	117	109	81	64	26	37	40
HGLibA_00042	AADAT	0	39	51	0	3	14	33
HGLibA_00043	AAED1	164	81	175	122	123	51	135
HGLibA_00044	AAED1	87	88	348	201	126	148	180
HGLibA_00045	AAED1	0	12	18	0	0	11	28
HGLibA_00046	AAGAB	239	216	405	223	210	251	271
HGLibA_00047	AAGAB	389	134	528	242	231	196	173
HGLibA_00048	AAGAB	67	115	170	76	52	105	62
HGLibA_00049	AAK1	213	153	187	141	133	98	89
HGLibA_00050	AAK1	148	144	154	126	34	92	42
HGLibA_00051	AAK1	158	227	270	84	101	192	142
HGLibA_00052	AAMDC	0	25	45	19	0	16	17
HGLibA_00053	AAMDC	133	139	137	120	147	116	139
HGLibA_00054	AAMDC	16	119	42	80	57	69	13
HGLibA_00055	AAMP	6	10	15	3	2	9	13
HGLibA_00056	AAMP	40	39	20	25	37	53	96
HGLibA_00057	AAMP	241	215	484	248	271	189	189
HGLibA_00058	AANAT	170	103	252	71	28	45	15
HGLibA_00059	AANAT	103	115	641	168	156	104	152
HGLibA_00060	AANAT	0	92	112	33	41	90	29
HGLibA_00061	AAR2	52	47	286	38	52	117	126
HGLibA_00062	AAR2	426	350	765	272	299	384	360
HGLibA_00063	AAR2	0	15	100	17	14	62	41
HGLibA_00064	AARD	57	34	103	24	14	97	101
HGLibA_00065	AARD	191	100	212	184	147	104	102
HGLibA_00066	AARD	133	108	191	131	166	110	120
HGLibA_00067	AARS	77	25	139	28	0	0	33
HGLibA_00068	AARS	0	0	74	0	3	0	1
HGLibA_00069	AARS	173	122	305	102	85	84	167
HGLibA_00070	AARS2	155	95	492	100	113	140	187
HGLibA_00071	AARS2	85	14	123	106	52	16	78
HGLibA_00072	AARS2	80	151	174	145	176	194	116
HGLibA_00073	AARSD1	90	101	204	97	101	71	101
HGLibA_00074	AARSD1	181	155	248	160	203	111	88
HGLibA_00075	AARSD1	117	206	237	217	150	123	113
HGLibA_00076	AASDH	104	251	410	201	113	222	274
HGLibA_00077	AASDH	205	284	748	253	239	264	300
HGLibA_00078	AASDH	32	93	129	102	11	27	48
HGLibA_00079	AASDHPPT	157	146	350	34	143	117	221
HGLibA_00080	AASDHPPT	156	86	556	144	98	173	175
HGLibA_00081	AASDHPPT	181	266	316	135	156	181	86
HGLibA_00082	AASS	19	50	240	30	0	28	50
HGLibA_00083	AASS	32	13	135	20	75	94	33
HGLibA_00084	AASS	37	41	124	17	57	72	70
HGLibA_00085	AATF	40	20	236	55	51	31	25
HGLibA_00086	AATF	242	112	327	155	161	190	172
HGLibA_00087	AATF	0	40	313	53	31	67	54
HGLibA_00088	AATK	0	44	10	0	9	67	44
HGLibA_00089	AATK	86	86	259	52	51	29	33
HGLibA_00090	AATK	261	251	136	200	238	237	257
HGLibA_00091	ABAT	117	66	21	80	80	190	109
HGLibA_00092	ABAT	29	67	217	83	124	113	139
HGLibA_00093	ABAT	136	154	322	184	133	273	99
HGLibA_00094	ABCA1	174	150	313	75	179	103	77
HGLibA_00095	ABCA1	146	205	578	119	97	166	47
HGLibA_00096	ABCA1	122	135	16	87	145	83	127
HGLibA_00097	ABCA10	138	90	156	134	136	217	123
HGLibA_00098	ABCA10	99	232	574	264	165	361	194
HGLibA_00099	ABCA10	231	206	414	291	241	297	187
HGLibA_00100	ABCA12	86	42	31	63	37	119	89
HGLibA_00101	ABCA12	96	134	546	108	63	35	67
HGLibA_00102	ABCA12	23	140	64	56	79	41	80
HGLibA_00103	ABCA13	190	152	474	138	138	80	79
HGLibA_00104	ABCA13	220	204	719	212	253	275	245
HGLibA_00105	ABCA13	16	85	238	120	58	41	96
HGLibA_00106	ABCA2	171	199	481	227	147	176	250
HGLibA_00107	ABCA2	14	37	172	22	25	25	23
HGLibA_00108	ABCA2	0	29	143	0	0	0	0
HGLibA_00109	ABCA3	150	190	676	199	121	96	205
HGLibA_00110	ABCA3	134	125	123	115	142	133	101
HGLibA_00111	ABCA3	61	110	191	38	61	50	15
HGLibA_00112	ABCA4	218	184	417	62	110	131	127
HGLibA_00113	ABCA4	172	91	175	51	101	78	44
HGLibA_00114	ABCA4	145	108	156	133	148	105	32
HGLibA_00115	ABCA5	151	91	459	292	203	267	206
HGLibA_00116	ABCA5	34	51	183	36	58	123	52
HGLibA_00117	ABCA5	197	120	342	128	178	155	121
HGLibA_00118	ABCA6	88	194	282	175	136	142	130
HGLibA_00119	ABCA6	255	186	342	128	98	245	249
HGLibA_00120	ABCA6	62	73	98	79	124	73	51
HGLibA_00121	ABCA7	81	26	114	65	47	69	31
HGLibA_00122	ABCA7	69	67	254	88	51	99	26
HGLibA_00123	ABCA7	234	117	204	130	87	86	206
HGLibA_00124	ABCA8	83	193	155	131	131	56	107
HGLibA_00125	ABCA8	79	41	220	161	94	33	99
HGLibA_00126	ABCA8	84	28	170	63	58	86	87
HGLibA_00127	ABCA9	460	275	683	329	421	314	528
HGLibA_00128	ABCA9	167	40	62	60	41	125	69
HGLibA_00129	ABCA9	10	27	32	0	0	21	0
HGLibA_00130	ABCB1	24	22	0	19	46	0	63
HGLibA_00131	ABCB1	222	237	445	145	149	200	167
HGLibA_00132	ABCB1	12	39	82	15	0	36	2
HGLibA_00133	ABCB10	102	99	312	152	130	111	94
HGLibA_00134	ABCB10	198	162	242	69	120	115	161
HGLibA_00135	ABCB10	154	110	247	141	94	263	127
HGLibA_00136	ABCB11	71	32	63	29	70	72	68
HGLibA_00137	ABCB11	107	66	290	81	93	23	61
HGLibA_00138	ABCB11	42	39	171	29	48	56	31
HGLibA_00139	ABCB4	111	147	324	227	69	119	111
HGLibA_00140	ABCB4	179	125	358	178	175	91	26
HGLibA_00141	ABCB4	259	213	518	240	250	358	385
HGLibA_00142	ABCB5	133	135	256	96	85	72	4
HGLibA_00143	ABCB5	104	32	333	109	33	26	71
HGLibA_00144	ABCB5	172	109	351	134	124	145	85
HGLibA_00145	ABCB6	214	132	555	143	167	100	132
HGLibA_00146	ABCB6	306	140	225	180	107	110	146
HGLibA_00147	ABCB6	121	186	185	135	32	77	53
HGLibA_00148	ABCB7	123	129	506	204	184	175	274
HGLibA_00149	ABCB7	28	40	54	26	38	62	15
HGLibA_00150	ABCB7	127	47	116	48	24	109	26
HGLibA_00151	ABCB8	150	55	259	143	104	33	149
HGLibA_00152	ABCB8	236	229	1037	159	206	254	426
HGLibA_00153	ABCB8	67	34	208	79	23	64	30
HGLibA_00154	ABCB9	72	7	141	24	0	31	79
HGLibA_00155	ABCB9	152	154	407	104	147	209	105
HGLibA_00156	ABCB9	76	102	110	65	62	46	56
HGLibA_00157	ABCC1	212	21	493	84	99	140	157
HGLibA_00158	ABCC1	153	153	278	124	107	110	126
HGLibA_00159	ABCC1	112	70	171	26	60	77	10
HGLibA_00160	ABCC10	108	128	380	129	103	222	190
HGLibA_00161	ABCC10	26	44	222	60	65	57	17
HGLibA_00162	ABCC10	263	184	434	185	89	258	159
HGLibA_00163	ABCC11	86	146	73	52	71	222	109
HGLibA_00164	ABCC11	132	70	304	125	101	83	33
HGLibA_00165	ABCC11	74	153	322	143	100	142	156
HGLibA_00166	ABCC12	64	23	41	60	92	99	196
HGLibA_00167	ABCC12	166	242	290	96	90	120	140
HGLibA_00168	ABCC12	247	162	600	217	197	224	188
HGLibA_00169	ABCC2	55	48	153	65	31	67	88
HGLibA_00170	ABCC2	60	37	0	16	6	29	35
HGLibA_00171	ABCC2	29	155	284	91	49	45	100
HGLibA_00172	ABCC3	0	18	48	20	7	13	35
HGLibA_00173	ABCC3	34	102	93	11	118	64	53
HGLibA_00174	ABCC3	151	73	300	48	119	131	71
HGLibA_00175	ABCC4	85	94	90	101	59	86	97
HGLibA_00176	ABCC4	388	347	544	287	358	374	302
HGLibA_00177	ABCC4	179	126	212	182	147	230	214
HGLibA_00178	ABCC5	85	38	570	20	40	37	38
HGLibA_00179	ABCC5	116	69	116	53	93	53	32
HGLibA_00180	ABCC5	122	133	212	110	98	35	116
HGLibA_00181	ABCC6	95	240	362	240	145	112	154
HGLibA_00182	ABCC6	86	36	130	50	10	107	85
HGLibA_00183	ABCC6	114	219	330	127	146	97	134
HGLibA_00184	ABCC8	65	28	149	80	49	47	24
HGLibA_00185	ABCC8	285	158	661	296	175	248	310
HGLibA_00186	ABCC8	133	111	246	98	105	135	66
HGLibA_00187	ABCC9	199	192	407	149	224	246	142
HGLibA_00188	ABCC9	27	117	118	77	84	134	72
HGLibA_00189	ABCC9	18	28	19	12	44	28	49
HGLibA_00190	ABCD1	214	107	287	142	147	78	52
HGLibA_00191	ABCD1	57	40	137	55	138	96	58
HGLibA_00192	ABCD1	147	39	280	69	109	132	86
HGLibA_00193	ABCD2	110	121	317	52	114	146	156
HGLibA_00194	ABCD2	120	115	299	125	180	85	145
HGLibA_00195	ABCD2	29	11	132	0	8	25	26
HGLibA_00196	ABCD3	212	132	314	182	162	296	200
HGLibA_00197	ABCD3	211	107	206	268	185	189	137
HGLibA_00198	ABCD3	45	66	140	67	109	66	50
HGLibA_00199	ABCD4	179	122	367	113	147	125	116
HGLibA_00200	ABCD4	132	210	690	293	190	152	167
HGLibA_00201	ABCD4	27	29	202	48	60	121	75
HGLibA_00202	ABCE1	175	106	336	289	214	293	341
HGLibA_00203	ABCE1	160	156	340	223	125	202	163
HGLibA_00204	ABCE1	1	28	77	0	0	16	23
HGLibA_00205	ABCF1	39	43	20	62	46	27	27
HGLibA_00206	ABCF1	81	34	191	100	31	75	126
HGLibA_00207	ABCF1	112	129	589	143	128	135	161
HGLibA_00208	ABCF2	87	88	272	51	49	57	56
HGLibA_00209	ABCF2	115	66	265	81	58	91	37
HGLibA_00210	ABCF2	134	62	453	64	189	64	124
HGLibA_00211	ABCF3	219	170	150	96	149	222	113
HGLibA_00212	ABCF3	60	171	626	128	93	80	148
HGLibA_00213	ABCF3	152	70	109	55	104	37	89
HGLibA_00214	ABCG1	149	111	201	82	102	102	58
HGLibA_00215	ABCG1	71	45	86	82	108	69	98
HGLibA_00216	ABCG1	89	122	150	77	98	105	154
HGLibA_00217	ABCG2	29	128	311	187	121	145	22
HGLibA_00218	ABCG2	158	155	134	92	135	102	50
HGLibA_00219	ABCG2	276	274	787	235	326	334	230
HGLibA_00220	ABCG4	408	299	587	316	264	248	286
HGLibA_00221	ABCG4	72	48	197	15	79	0	0
HGLibA_00222	ABCG4	266	233	456	160	198	259	265
HGLibA_00223	ABCG5	67	106	304	82	48	81	39
HGLibA_00224	ABCG5	21	109	94	41	108	31	51
HGLibA_00225	ABCG5	106	86	71	60	60	111	155
HGLibA_00226	ABCG8	87	34	155	5	9	62	35
HGLibA_00227	ABCG8	32	36	132	47	26	11	21
HGLibA_00228	ABCG8	20	114	390	79	36	22	79
HGLibA_00229	ABHD1	100	52	223	31	73	57	34
HGLibA_00230	ABHD1	76	101	271	58	108	47	64
HGLibA_00231	ABHD1	21	13	89	31	85	41	1
HGLibA_00232	ABHD10	67	24	58	22	90	118	123
HGLibA_00233	ABHD10	14	23	181	140	68	113	53
HGLibA_00234	ABHD10	130	144	554	117	134	157	168
HGLibA_00235	ABHD11	151	120	94	115	81	79	85
HGLibA_00236	ABHD11	77	30	444	40	117	46	66
HGLibA_00237	ABHD11	125	97	146	61	129	160	63
HGLibA_00238	ABHD12	75	120	306	22	79	49	77
HGLibA_00239	ABHD12	169	241	272	121	136	161	133
HGLibA_00240	ABHD12	438	418	643	301	420	179	274
HGLibA_00241	ABHD12B	128	147	829	155	236	144	254
HGLibA_00242	ABHD12B	370	160	444	149	156	242	176
HGLibA_00243	ABHD12B	116	39	227	68	36	81	76
HGLibA_00244	ABHD13	24	156	175	151	81	98	47
HGLibA_00245	ABHD13	30	107	179	151	96	205	169
HGLibA_00246	ABHD13	294	268	596	205	322	196	190
HGLibA_00247	ABHD14A	73	74	70	24	92	43	63
HGLibA_00248	ABHD14A	172	97	181	198	174	212	184
HGLibA_00249	ABHD14A	62	8	135	18	89	89	55
HGLibA_00250	ABHD14B	89	252	592	214	193	150	343
HGLibA_00251	ABHD14B	113	91	397	38	110	174	113
HGLibA_00252	ABHD14B	139	140	243	117	49	42	273
HGLibA_00253	ABHD15	66	41	102	56	40	41	37
HGLibA_00254	ABHD15	30	70	108	92	53	72	86
HGLibA_00255	ABHD15	114	193	253	110	92	28	31
HGLibA_00256	ABHD16A	23	26	37	44	15	38	80
HGLibA_00257	ABHD16A	77	38	180	41	66	60	28
HGLibA_00258	ABHD16A	220	146	111	272	114	98	93
HGLibA_00259	ABHD16B	119	52	99	56	77	41	49
HGLibA_00260	ABHD16B	332	125	510	103	158	154	307
HGLibA_00261	ABHD16B	261	131	711	145	253	109	193
HGLibA_00262	ABHD17A	0	55	172	10	25	59	46
HGLibA_00263	ABHD17A	8	44	40	26	27	33	11
HGLibA_00264	ABHD17A	155	77	359	103	75	225	202
HGLibA_00265	ABHD17B	0	80	316	55	99	76	51
HGLibA_00266	ABHD17B	62	41	34	161	89	126	79
HGLibA_00267	ABHD17B	120	173	206	103	137	130	109
HGLibA_00268	ABHD17C	137	95	102	149	124	207	210
HGLibA_00269	ABHD17C	200	197	368	80	108	100	69
HGLibA_00270	ABHD17C	48	66	72	0	33	28	22
HGLibA_00271	ABHD2	0	31	78	25	37	3	20
HGLibA_00272	ABHD2	234	327	472	254	240	174	255
HGLibA_00273	ABHD2	148	79	119	88	61	66	42
HGLibA_00274	ABHD3	183	125	408	156	126	167	106
HGLibA_00275	ABHD3	245	165	358	134	66	57	119
HGLibA_00276	ABHD3	225	156	254	135	227	114	154
HGLibA_00277	ABHD4	312	163	325	255	214	163	216
HGLibA_00278	ABHD4	59	151	223	28	61	56	61
HGLibA_00279	ABHD4	187	275	335	190	200	266	174
HGLibA_00280	ABHD5	90	74	174	89	52	63	70
HGLibA_00281	ABHD5	134	170	248	238	206	175	206
HGLibA_00282	ABHD5	205	149	393	111	83	100	121
HGLibA_00283	ABHD6	105	40	100	48	49	50	53
HGLibA_00284	ABHD6	32	1	161	37	64	34	11
HGLibA_00285	ABHD6	53	131	225	118	102	237	104
HGLibA_00286	ABHD8	299	147	563	276	233	220	146
HGLibA_00287	ABHD8	103	54	216	67	85	110	32
HGLibA_00288	ABHD8	114	79	182	114	39	48	59
HGLibA_00289	ABI1	201	155	407	63	63	40	135
HGLibA_00290	ABI1	310	208	408	153	184	374	250
HGLibA_00291	ABI1	144	283	497	245	414	236	266
HGLibA_00292	ABI2	274	149	237	69	136	94	128
HGLibA_00293	ABI2	113	119	377	98	124	57	71
HGLibA_00294	ABI2	115	220	305	163	201	116	150
HGLibA_00295	ABI3	102	15	194	18	35	25	24
HGLibA_00296	ABI3	70	74	82	31	105	122	101
HGLibA_00297	ABI3	53	186	263	76	55	123	223
HGLibA_00298	ABI3BP	169	202	275	199	136	216	203
HGLibA_00299	ABI3BP	85	148	100	97	33	92	74
HGLibA_00300	ABI3BP	330	207	76	106	202	240	56
HGLibA_00301	ABL1	192	224	572	141	208	292	86
HGLibA_00302	ABL1	277	189	627	232	205	232	312
HGLibA_00303	ABL1	70	88	213	73	130	14	86
HGLibA_00304	ABL2	172	184	846	161	174	212	202
HGLibA_00305	ABL2	140	90	200	80	72	58	71
HGLibA_00306	ABL2	564	382	1421	461	418	531	508
HGLibA_00307	ABLIM1	108	71	227	72	60	89	55
HGLibA_00308	ABLIM1	149	150	582	95	117	263	215
HGLibA_00309	ABLIM1	176	140	370	302	88	97	147
HGLibA_00310	ABLIM2	102	134	371	193	121	177	215
HGLibA_00311	ABLIM2	88	130	199	60	137	148	75
HGLibA_00312	ABLIM2	144	95	178	86	120	125	98
HGLibA_00313	ABLIM3	135	193	356	99	92	123	80
HGLibA_00314	ABLIM3	29	54	62	49	20	0	31
HGLibA_00315	ABLIM3	156	73	419	88	168	183	104
HGLibA_00316	ABO	114	99	208	61	30	121	117
HGLibA_00317	ABO	37	9	71	0	51	16	21
HGLibA_00318	ABO	118	122	217	108	46	83	32
HGLibA_00319	ABP1	320	237	489	163	124	280	277
HGLibA_00320	ABP1	249	64	257	99	153	141	114
HGLibA_00321	ABP1	460	348	970	363	189	336	407
HGLibA_00322	ABR	43	73	197	45	104	29	66
HGLibA_00323	ABR	99	66	127	88	35	91	135
HGLibA_00324	ABR	109	188	206	119	85	153	68
HGLibA_00325	ABRA	275	149	250	184	283	145	173
HGLibA_00326	ABRA	123	138	75	232	226	155	188
HGLibA_00327	ABRA	317	180	637	63	178	123	150
HGLibA_00328	ABRACL	44	68	205	76	53	76	32
HGLibA_00329	ABRACL	77	45	157	55	84	32	100
HGLibA_00330	ABRACL	144	64	99	91	46	65	41
HGLibA_00331	ABT1	146	231	542	221	178	235	197
HGLibA_00332	ABT1	23	57	278	27	23	8	15
HGLibA_00333	ABT1	208	68	492	142	97	114	70
HGLibA_00334	ABTB1	63	97	167	50	59	47	15
HGLibA_00335	ABTB1	230	183	604	153	198	199	166
HGLibA_00336	ABTB1	274	378	311	168	185	263	189
HGLibA_00337	ABTB2	39	15	355	68	109	54	89
HGLibA_00338	ABTB2	121	90	463	98	87	143	145
HGLibA_00339	ABTB2	86	55	219	140	94	68	64
HGLibA_00340	ACAA1	62	52	156	34	29	70	73
HGLibA_00341	ACAA1	88	140	94	82	79	39	56
HGLibA_00342	ACAA1	427	137	696	325	174	260	201
HGLibA_00343	ACAA2	139	80	179	58	41	79	72
HGLibA_00344	ACAA2	112	76	207	121	106	146	163
HGLibA_00345	ACAA2	58	101	266	156	219	62	70
HGLibA_00346	ACACA	155	234	358	198	100	236	202
HGLibA_00347	ACACA	57	101	271	115	230	158	112
HGLibA_00348	ACACA	65	11	75	109	57	89	61
HGLibA_00349	ACACB	38	25	131	40	40	8	6
HGLibA_00350	ACACB	53	81	127	85	35	46	73
HGLibA_00351	ACACB	151	252	381	150	203	119	258
HGLibA_00352	ACAD10	81	75	103	96	43	43	44
HGLibA_00353	ACAD10	103	102	165	55	162	88	112
HGLibA_00354	ACAD10	72	68	59	142	298	136	88
HGLibA_00355	ACAD11	208	137	406	164	105	172	101
HGLibA_00356	ACAD11	45	146	193	87	91	77	110
HGLibA_00357	ACAD11	208	254	591	120	193	269	222
HGLibA_00358	ACAD8	100	92	269	99	67	124	68
HGLibA_00359	ACAD8	80	100	202	97	64	60	28
HGLibA_00360	ACAD8	94	25	101	69	168	51	52
HGLibA_00361	ACAD9	223	208	349	212	234	160	165
HGLibA_00362	ACAD9	75	175	275	118	130	112	116
HGLibA_00363	ACAD9	55	23	103	26	57	59	0
HGLibA_00364	ACADL	162	313	304	143	86	178	139
HGLibA_00365	ACADL	105	51	181	107	83	40	94
HGLibA_00366	ACADL	66	47	229	21	32	58	59
HGLibA_00367	ACADM	201	70	0	148	66	22	43
HGLibA_00368	ACADM	57	23	8	46	34	55	42
HGLibA_00369	ACADM	115	185	290	181	124	137	184
HGLibA_00370	ACADS	118	69	368	134	119	131	138
HGLibA_00371	ACADS	264	267	450	172	144	168	240
HGLibA_00372	ACADS	407	312	640	291	326	337	313
HGLibA_00373	ACADSB	114	76	251	144	118	164	126
HGLibA_00374	ACADSB	207	111	280	185	45	128	185
HGLibA_00375	ACADSB	79	28	111	50	73	105	32
HGLibA_00376	ACADVL	50	17	68	74	29	0	16
HGLibA_00377	ACADVL	64	59	108	17	10	26	108
HGLibA_00378	ACADVL	157	87	338	83	108	79	143
HGLibA_00379	ACAN	115	163	141	93	174	103	153
HGLibA_00380	ACAN	164	62	159	136	164	170	227
HGLibA_00381	ACAN	146	49	529	101	136	194	143
HGLibA_00382	ACAP1	386	314	747	321	363	359	466
HGLibA_00383	ACAP1	78	61	221	73	78	41	101
HGLibA_00384	ACAP1	128	127	491	177	57	76	105
HGLibA_00385	ACAP2	349	319	373	164	250	350	245
HGLibA_00386	ACAP2	21	48	44	18	19	14	28
HGLibA_00387	ACAP2	246	282	799	264	316	362	203
HGLibA_00388	ACAP3	75	11	237	74	24	39	40
HGLibA_00389	ACAP3	325	298	575	258	254	253	211
HGLibA_00390	ACAP3	157	153	344	105	135	123	157
HGLibA_00391	ACAT1	199	183	325	53	54	200	137
HGLibA_00392	ACAT1	181	137	208	216	200	233	213
HGLibA_00393	ACAT1	199	118	438	128	192	162	269
HGLibA_00394	ACAT2	173	221	27	66	148	116	138
HGLibA_00395	ACAT2	160	113	507	42	75	69	61
HGLibA_00396	ACAT2	450	327	481	381	274	297	346
HGLibA_00397	ACBD3	95	55	140	57	93	120	96
HGLibA_00398	ACBD3	38	35	0	37	41	26	81
HGLibA_00399	ACBD3	116	64	199	30	64	49	136
HGLibA_00400	ACBD4	216	176	309	166	227	200	189
HGLibA_00401	ACBD4	86	91	63	90	82	47	51
HGLibA_00402	ACBD4	100	139	466	49	111	94	87
HGLibA_00403	ACBD5	213	137	536	155	169	148	110
HGLibA_00404	ACBD5	143	130	325	141	232	196	308
HGLibA_00405	ACBD5	79	79	249	116	103	96	170
HGLibA_00406	ACBD6	16	20	140	27	18	0	13
HGLibA_00407	ACBD6	50	35	63	0	0	10	0
HGLibA_00408	ACBD6	12	47	0	6	2	11	45
HGLibA_00409	ACBD7	108	56	326	77	90	142	126
HGLibA_00410	ACBD7	403	285	435	289	310	219	153
HGLibA_00411	ACBD7	83	143	96	249	109	193	261
HGLibA_00412	ACCS	19	58	95	18	79	54	26
HGLibA_00413	ACCS	151	152	667	112	195	165	246
HGLibA_00414	ACCS	184	159	252	145	127	189	106
HGLibA_00415	ACCSL	113	41	306	77	87	225	164
HGLibA_00416	ACCSL	93	142	120	135	125	18	151
HGLibA_00417	ACCSL	12	50	110	65	28	13	20
HGLibA_00418	ACD	123	54	95	27	17	118	59
HGLibA_00419	ACD	202	112	437	152	76	111	108
HGLibA_00420	ACD	116	22	100	58	77	45	55
HGLibA_00421	ACE	85	50	152	68	93	76	30
HGLibA_00422	ACE	130	185	401	248	189	158	213
HGLibA_00423	ACE	50	87	327	86	87	114	104
HGLibA_00424	ACE2	26	48	248	66	72	146	99
HGLibA_00425	ACE2	195	170	333	152	151	98	147
HGLibA_00426	ACE2	296	154	526	293	204	115	226
HGLibA_00427	ACER1	396	288	428	300	268	228	239
HGLibA_00428	ACER1	119	13	58	69	47	66	131
HGLibA_00429	ACER1	145	350	537	235	211	221	276
HGLibA_00430	ACER2	196	182	250	210	141	156	148
HGLibA_00431	ACER2	14	14	0	22	40	80	39
HGLibA_00432	ACER2	274	275	233	245	319	259	445
HGLibA_00433	ACER3	196	138	443	84	165	74	190
HGLibA_00434	ACER3	166	155	451	295	180	253	285
HGLibA_00435	ACER3	117	87	267	88	39	206	47
HGLibA_00436	ACHE	43	64	124	104	59	130	38
HGLibA_00437	ACHE	33	19	178	38	9	30	31
HGLibA_00438	ACHE	138	86	244	140	121	102	105
HGLibA_00439	ACIN1	284	140	515	172	214	140	185
HGLibA_00440	ACIN1	159	53	221	16	74	23	40
HGLibA_00441	ACIN1	105	181	255	136	106	99	96
HGLibA_00442	ACKR2	457	131	695	152	274	339	264
HGLibA_00443	ACKR2	272	227	926	253	247	352	232
HGLibA_00444	ACKR2	175	127	588	121	167	156	159
HGLibA_00445	ACKR3	464	284	1178	355	160	284	241
HGLibA_00446	CXCR7	305	255	227	177	288	153	184
HGLibA_00447	CXCR7	187	96	120	42	135	137	53
HGLibA_00448	CCRL1	109	120	289	54	99	107	67
HGLibA_00449	ACKR4	222	138	203	196	277	62	74
HGLibA_00450	ACKR4	60	182	231	148	109	60	153
HGLibA_00451	ACLY	34	13	139	13	71	52	86
HGLibA_00452	ACLY	67	126	94	68	42	116	95
HGLibA_00453	ACLY	284	138	267	216	152	93	187
HGLibA_00454	ACMSD	168	165	205	145	89	185	179
HGLibA_00455	ACMSD	188	94	500	109	169	140	245
HGLibA_00456	ACMSD	80	25	261	116	89	71	92
HGLibA_00457	ACN9	86	111	189	101	96	105	145
HGLibA_00458	ACN9	101	50	181	45	82	134	122
HGLibA_00459	ACN9	64	84	287	137	75	125	75
HGLibA_00460	ACO1	111	113	228	74	238	98	49
HGLibA_00461	ACO1	26	32	116	26	0	64	33
HGLibA_00462	ACO1	264	168	519	362	270	298	337
HGLibA_00463	ACO2	108	135	158	137	124	83	149
HGLibA_00464	ACO2	114	166	323	127	154	140	84
HGLibA_00465	ACO2	21	33	149	42	24	44	79
HGLibA_00466	ACOT1	239	62	538	161	214	119	100
HGLibA_00467	ACOT1	352	312	780	361	154	252	345
HGLibA_00468	ACOT1	196	148	170	132	105	73	44
HGLibA_00469	ACOT11	98	186	199	45	76	105	94
HGLibA_00470	ACOT11	239	87	169	73	110	122	179
HGLibA_00471	ACOT11	17	167	92	78	39	95	96
HGLibA_00472	ACOT12	49	0	279	95	37	48	55
HGLibA_00473	ACOT12	21	15	0	9	28	28	17
HGLibA_00474	ACOT12	95	110	129	38	0	51	51
HGLibA_00475	ACOT13	51	47	19	65	48	1	7
HGLibA_00476	ACOT13	63	55	216	121	71	48	60
HGLibA_00477	ACOT13	73	134	124	104	106	98	84
HGLibA_00478	ACOT2	12	38	78	0	0	15	0
HGLibA_00479	ACOT2	118	145	224	104	191	61	33
HGLibA_00480	ACOT2	107	148	419	57	137	170	152
HGLibA_00481	ACOT4	22	12	39	36	0	15	71
HGLibA_00482	ACOT4	64	25	107	45	27	49	30
HGLibA_00483	ACOT4	65	47	0	20	24	49	29
HGLibA_00484	ACOT6	286	231	686	326	432	324	262
HGLibA_00485	ACOT6	119	119	290	69	199	226	197
HGLibA_00486	ACOT6	16	62	183	20	91	76	69
HGLibA_00487	ACOT7	131	37	51	29	63	67	95
HGLibA_00488	ACOT7	92	113	376	109	75	146	123
HGLibA_00489	ACOT7	349	175	865	52	118	156	126
HGLibA_00490	ACOT8	173	48	156	41	114	37	20
HGLibA_00491	ACOT8	45	50	81	34	66	6	15
HGLibA_00492	ACOT8	561	291	961	199	167	211	129
HGLibA_00493	ACOT9	213	244	430	160	147	260	145
HGLibA_00494	ACOT9	18	36	72	43	29	61	35
HGLibA_00495	ACOT9	87	201	280	176	117	119	225
HGLibA_00496	ACOX1	215	237	268	119	52	133	138
HGLibA_00497	ACOX1	72	107	242	71	108	134	41
HGLibA_00498	ACOX1	35	2	0	100	74	44	67
HGLibA_00499	ACOX2	0	43	150	48	116	50	52
HGLibA_00500	ACOX2	91	116	592	146	113	80	98
HGLibA_00501	ACOX2	391	261	680	144	163	259	84
HGLibA_00502	ACOX3	150	95	346	159	89	143	68
HGLibA_00503	ACOX3	274	153	236	75	0	96	59
HGLibA_00504	ACOX3	59	23	78	19	36	23	46
HGLibA_00505	ACOXL	82	93	169	103	46	78	53
HGLibA_00506	ACOXL	200	170	206	160	75	196	140
HGLibA_00507	ACOXL	181	127	302	93	134	73	115
HGLibA_00508	ACP1	123	177	158	77	78	126	77
HGLibA_00509	ACP1	69	124	506	80	68	100	72
HGLibA_00510	ACP1	28	61	376	123	92	126	138
HGLibA_00511	ACP2	42	76	501	131	127	137	97
HGLibA_00512	ACP2	89	108	192	93	87	92	106
HGLibA_00513	ACP2	18	31	53	35	68	34	36
HGLibA_00514	ACP5	67	21	118	45	20	31	11
HGLibA_00515	ACP5	125	78	36	31	18	30	29
HGLibA_00516	ACP5	43	53	119	78	72	99	64
HGLibA_00517	ACP6	257	149	326	182	184	162	158
HGLibA_00518	ACP6	85	105	282	7	149	188	158
HGLibA_00519	ACP6	184	133	405	146	221	106	142
HGLibA_00520	ACPL2	20	66	96	48	29	72	109
HGLibA_00521	ACPL2	91	40	170	59	80	109	86
HGLibA_00522	ACPL2	152	224	306	230	134	276	183
HGLibA_00523	ACPP	110	103	329	116	201	147	142
HGLibA_00524	ACPP	33	20	71	86	21	66	5
HGLibA_00525	ACPP	440	288	1147	232	216	144	140
HGLibA_00526	ACPT	82	101	284	96	151	52	127
HGLibA_00527	ACPT	0	15	158	24	39	65	55
HGLibA_00528	ACPT	84	145	428	76	39	90	55
HGLibA_00529	ACR	42	27	198	69	95	26	48
HGLibA_00530	ACR	172	91	445	125	86	200	107
HGLibA_00531	ACR	113	163	140	159	180	73	90
HGLibA_00532	ACRBP	143	136	287	86	50	131	89
HGLibA_00533	ACRBP	232	160	304	104	187	72	138
HGLibA_00534	ACRBP	116	8	67	41	47	27	36
HGLibA_00535	ACRC	248	172	545	165	65	177	116
HGLibA_00536	ACRC	26	0	188	19	10	29	39
HGLibA_00537	ACRC	226	260	416	263	242	219	307
HGLibA_00538	ACRV1	99	143	269	97	131	234	133
HGLibA_00539	ACRV1	138	45	249	121	202	98	195
HGLibA_00540	ACRV1	92	151	239	94	135	119	222
HGLibA_00541	ACSBG1	79	99	283	79	103	101	123
HGLibA_00542	ACSBG1	186	145	603	221	190	313	141
HGLibA_00543	ACSBG1	136	46	444	129	123	201	184
HGLibA_00544	ACSBG2	46	35	206	69	95	106	104
HGLibA_00545	ACSBG2	268	252	798	316	210	220	266
HGLibA_00546	ACSBG2	97	138	139	65	67	105	83
HGLibA_00547	ACSF2	100	19	336	66	14	55	35
HGLibA_00548	ACSF2	155	186	500	150	163	72	97
HGLibA_00549	ACSF2	67	44	103	40	28	14	69
HGLibA_00550	ACSF3	46	36	142	84	90	82	80
HGLibA_00551	ACSF3	205	126	231	161	205	73	34
HGLibA_00552	ACSF3	19	62	148	82	70	69	147
HGLibA_00553	ACSL1	249	161	463	270	281	193	99
HGLibA_00554	ACSL1	331	249	721	165	149	194	120
HGLibA_00555	ACSL1	367	147	317	138	171	292	239
HGLibA_00556	ACSL3	54	104	41	60	45	121	57
HGLibA_00557	ACSL3	67	22	194	27	22	49	0
HGLibA_00558	ACSL3	78	105	162	78	131	175	95
HGLibA_00559	ACSL4	163	117	236	83	127	72	66
HGLibA_00560	ACSL4	34	103	409	114	141	100	116
HGLibA_00561	ACSL4	159	246	383	108	104	234	224
HGLibA_00562	ACSL5	463	353	406	242	309	213	307
HGLibA_00563	ACSL5	82	46	0	20	23	0	69
HGLibA_00564	ACSL5	248	295	586	309	142	223	220
HGLibA_00565	ACSL6	227	99	276	49	74	107	188
HGLibA_00566	ACSL6	102	47	190	96	48	69	73
HGLibA_00567	ACSL6	210	89	96	78	116	95	92
HGLibA_00568	ACSM1	208	160	606	210	179	171	185
HGLibA_00569	ACSM1	185	160	511	184	155	143	122
HGLibA_00570	ACSM1	0	21	172	37	3	48	35
HGLibA_00571	ACSM2A	205	94	421	149	230	203	94
HGLibA_00572	ACSM2A	275	27	483	67	63	91	58
HGLibA_00573	ACSM2A	221	159	484	153	243	251	253
HGLibA_00574	ACSM2B	107	84	301	153	183	218	276
HGLibA_00575	ACSM2B	302	186	279	158	297	219	288
HGLibA_00576	ACSM2B	69	60	144	126	93	104	111
HGLibA_00577	ACSM3	131	153	349	240	145	124	104
HGLibA_00578	ACSM3	74	73	101	83	72	58	157
HGLibA_00579	ACSM3	221	167	325	179	230	252	130
HGLibA_00580	ACSM4	14	45	68	64	84	67	44
HGLibA_00581	ACSM4	241	113	450	180	100	154	251
HGLibA_00582	ACSM4	117	162	431	171	103	335	256
HGLibA_00583	ACSM5	11	98	110	118	62	138	179
HGLibA_00584	ACSM5	200	282	102	324	368	280	237
HGLibA_00585	ACSM5	95	77	221	25	90	125	25
HGLibA_00586	ACSS1	66	113	204	63	76	58	111
HGLibA_00587	ACSS1	79	35	153	140	70	94	124
HGLibA_00588	ACSS1	28	53	110	81	21	92	42
HGLibA_00589	ACSS2	152	179	428	166	138	155	205
HGLibA_00590	ACSS2	303	160	615	235	231	123	146
HGLibA_00591	ACSS2	36	83	318	98	121	81	116
HGLibA_00592	ACSS3	136	203	236	96	262	61	199
HGLibA_00593	ACSS3	0	16	4	15	18	39	43
HGLibA_00594	ACSS3	19	20	0	0	0	0	13
HGLibA_00595	ACTA1	463	264	455	299	270	317	342
HGLibA_00596	ACTA1	277	235	546	240	217	267	280
HGLibA_00597	ACTA1	87	183	429	48	81	113	115
HGLibA_00598	ACTA2	79	140	337	114	117	58	95
HGLibA_00599	ACTA2	61	78	314	109	101	91	179
HGLibA_00600	ACTA2	76	52	149	46	36	93	71
HGLibA_00601	ACTB	40	12	73	20	3	19	16
HGLibA_00602	ACTB	0	13	33	30	15	0	58
HGLibA_00603	ACTB	347	189	417	223	246	386	256
HGLibA_00604	ACTBL2	254	156	193	173	106	125	108
HGLibA_00605	ACTBL2	292	128	348	177	149	186	225
HGLibA_00606	ACTBL2	304	175	626	354	279	232	286
HGLibA_00607	ACTC1	110	119	302	78	139	103	123
HGLibA_00608	ACTC1	26	49	42	43	39	30	38
HGLibA_00609	ACTC1	85	36	170	98	22	60	40
HGLibA_00610	ACTG1	217	99	593	168	162	212	78
HGLibA_00611	ACTG1	168	175	827	234	264	177	267
HGLibA_00612	ACTG1	26	0	97	18	15	30	0
HGLibA_00613	ACTG2	100	197	379	188	172	153	314
HGLibA_00614	ACTG2	73	193	426	75	82	40	107
HGLibA_00615	ACTG2	218	114	341	164	179	121	108
HGLibA_00616	ACTL10	65	75	330	88	107	79	60
HGLibA_00617	ACTL10	8	24	48	0	18	0	13
HGLibA_00618	ACTL10	220	279	466	135	236	99	264
HGLibA_00619	ACTL6A	35	66	191	18	43	27	60
HGLibA_00620	ACTL6A	123	86	291	116	61	74	12
HGLibA_00621	ACTL6A	366	301	766	244	369	348	441
HGLibA_00622	ACTL6B	89	110	187	83	86	58	102
HGLibA_00623	ACTL6B	302	225	719	198	326	191	156
HGLibA_00624	ACTL6B	125	104	299	93	83	100	103
HGLibA_00625	ACTL7A	182	143	245	139	143	250	115
HGLibA_00626	ACTL7A	253	184	277	203	221	47	131
HGLibA_00627	ACTL7A	156	88	149	49	84	40	81
HGLibA_00628	ACTL7B	39	13	0	49	44	47	22
HGLibA_00629	ACTL7B	163	88	226	92	109	101	185
HGLibA_00630	ACTL7B	259	112	234	138	83	113	38
HGLibA_00631	ACTL8	55	60	137	35	75	36	37
HGLibA_00632	ACTL8	37	157	395	89	167	39	72
HGLibA_00633	ACTL8	0	16	54	0	27	0	0
HGLibA_00634	ACTL9	85	79	334	39	77	110	121
HGLibA_00635	ACTL9	0	69	60	24	74	64	16
HGLibA_00636	ACTL9	0	15	0	0	13	0	0
HGLibA_00637	ACTN1	184	168	150	245	164	197	161
HGLibA_00638	ACTN1	271	156	485	193	255	271	310
HGLibA_00639	ACTN1	105	11	177	42	27	0	13
HGLibA_00640	ACTN2	43	104	96	62	41	45	140
HGLibA_00641	ACTN2	49	12	37	40	66	62	51
HGLibA_00642	ACTN2	306	254	632	234	245	138	267
HGLibA_00643	ACTN4	223	228	552	204	223	280	241
HGLibA_00644	ACTN4	27	46	310	17	37	72	47
HGLibA_00645	ACTN4	62	38	89	0	0	8	22
HGLibA_00646	ACTR10	55	55	85	23	5	38	28
HGLibA_00647	ACTR10	96	187	149	106	94	174	172
HGLibA_00648	ACTR10	13	9	79	9	30	12	85
HGLibA_00649	ACTR1A	315	252	636	152	120	87	208
HGLibA_00650	ACTR1A	107	111	103	40	123	56	18
HGLibA_00651	ACTR1A	301	104	337	82	92	115	149
HGLibA_00652	ACTR1B	0	12	86	93	8	46	48
HGLibA_00653	ACTR1B	130	120	273	71	95	52	67
HGLibA_00654	ACTR1B	42	34	235	12	19	24	82
HGLibA_00655	ACTR2	15	8	108	39	36	8	29
HGLibA_00656	ACTR2	233	280	363	245	129	129	281
HGLibA_00657	ACTR2	49	47	89	23	0	65	0
HGLibA_00658	ACTR3	6	0	134	40	43	24	63
HGLibA_00659	ACTR3	118	114	420	133	241	246	191
HGLibA_00660	ACTR3	196	93	236	193	182	141	159
HGLibA_00661	ACTR3B	182	92	458	134	63	120	214
HGLibA_00662	ACTR3B	172	199	369	90	129	180	194
HGLibA_00663	ACTR3B	263	249	428	229	267	201	103
HGLibA_00664	ACTR3C	129	176	205	128	182	213	97
HGLibA_00665	ACTR3B	274	314	667	188	163	245	123
HGLibA_00666	ACTR3C	107	134	209	39	110	200	183
HGLibA_00667	ACTR5	10	189	449	127	134	178	86
HGLibA_00668	ACTR5	322	114	375	172	322	304	233
HGLibA_00669	ACTR5	125	142	422	118	47	64	118
HGLibA_00670	ACTR6	40	58	97	121	99	77	82
HGLibA_00671	ACTR6	166	135	289	48	85	80	75
HGLibA_00672	ACTR6	203	208	404	197	338	312	268
HGLibA_00673	ACTR8	68	72	346	96	70	48	38
HGLibA_00674	ACTR8	192	218	430	201	143	140	188
HGLibA_00675	ACTR8	138	77	332	135	29	52	186
HGLibA_00676	ACTRT1	44	39	235	36	16	63	29
HGLibA_00677	ACTRT1	46	82	143	78	149	111	76
HGLibA_00678	ACTRT1	59	198	224	206	121	317	148
HGLibA_00679	ACTRT2	23	20	27	0	0	35	16
HGLibA_00680	ACTRT2	115	129	398	156	131	126	164
HGLibA_00681	ACTRT2	284	201	397	88	127	162	130
HGLibA_00682	ACTRT3	83	84	194	203	40	90	94
HGLibA_00683	ACTRT3	31	18	30	15	12	25	44
HGLibA_00684	ACTRT3	100	61	187	81	178	134	169
HGLibA_00685	ACVR1	319	175	504	277	160	328	251
HGLibA_00686	ACVR1	205	103	470	113	105	253	206
HGLibA_00687	ACVR1	71	288	484	163	276	249	111
HGLibA_00688	ACVR1B	236	241	575	155	70	181	195
HGLibA_00689	ACVR1B	197	119	317	147	77	106	254
HGLibA_00690	ACVR1B	13	29	87	0	0	0	28
HGLibA_00691	ACVR1C	109	84	143	66	62	185	93
HGLibA_00692	ACVR1C	414	332	852	301	203	298	362
HGLibA_00693	ACVR1C	163	193	581	147	121	218	175
HGLibA_00694	ACVR2A	171	171	574	253	221	227	236
HGLibA_00695	ACVR2A	112	170	492	127	132	151	215
HGLibA_00696	ACVR2A	116	192	408	228	213	185	270
HGLibA_00697	ACVR2B	22	27	85	13	15	5	13
HGLibA_00698	ACVR2B	216	170	559	146	133	155	183
HGLibA_00699	ACVR2B	139	69	183	38	90	196	73
HGLibA_00700	ACVRL1	54	148	406	107	61	70	213
HGLibA_00701	ACVRL1	221	297	527	200	127	107	154
HGLibA_00702	ACVRL1	185	72	425	228	145	236	88
HGLibA_00703	ACY1	28	56	298	13	38	9	27
HGLibA_00704	ACY1	55	49	99	11	54	21	68
HGLibA_00705	ACY1	33	73	96	29	60	32	27
HGLibA_00706	ACY3	32	59	274	23	73	16	59
HGLibA_00707	ACY3	133	122	257	79	124	62	155
HGLibA_00708	ACY3	85	108	23	127	77	47	89
HGLibA_00709	ACYP1	149	101	582	187	125	99	134
HGLibA_00710	ACYP1	118	137	413	139	147	170	250
HGLibA_00711	ACYP1	148	198	191	245	257	291	268
HGLibA_00712	ACYP2	155	166	362	186	197	189	158
HGLibA_00713	ACYP2	25	96	305	89	108	103	28
HGLibA_00714	ACYP2	38	56	105	70	22	17	43
HGLibA_00715	ADA	114	175	326	172	74	73	142
HGLibA_00716	ADA	126	200	387	225	190	204	166
HGLibA_00717	ADA	35	107	108	33	81	28	25
HGLibA_00718	ADAD1	405	175	463	267	205	166	275
HGLibA_00719	ADAD1	119	83	114	52	40	101	96
HGLibA_00720	ADAD1	16	32	27	0	38	37	70
HGLibA_00721	ADAD2	53	174	197	46	33	75	107
HGLibA_00722	ADAD2	93	105	359	111	155	128	96
HGLibA_00723	ADAD2	58	124	193	106	130	178	104
HGLibA_00724	ADAL	243	156	301	226	86	162	205
HGLibA_00725	ADAL	273	239	416	237	194	253	143
HGLibA_00726	ADAL	27	62	273	58	92	60	17
HGLibA_00727	ADAM10	95	32	59	1	38	54	41
HGLibA_00728	ADAM10	22	54	160	30	108	72	32
HGLibA_00729	ADAM10	88	30	200	59	66	50	90
HGLibA_00730	ADAM11	154	126	263	160	53	41	64
HGLibA_00731	ADAM11	174	68	224	105	192	163	123
HGLibA_00732	ADAM11	102	69	74	26	85	101	79
HGLibA_00733	ADAM12	303	133	287	102	232	148	225
HGLibA_00734	ADAM12	132	166	236	123	120	101	136
HGLibA_00735	ADAM12	25	130	48	96	54	97	81
HGLibA_00736	ADAM15	176	116	127	86	69	92	76
HGLibA_00737	ADAM15	43	72	152	86	77	93	91
HGLibA_00738	ADAM15	244	170	214	130	156	154	148
HGLibA_00739	ADAM17	209	102	380	199	182	130	122
HGLibA_00740	ADAM17	147	110	325	205	159	193	110
HGLibA_00741	ADAM17	269	303	629	145	241	392	153
HGLibA_00742	ADAM18	256	251	651	255	198	317	276
HGLibA_00743	ADAM18	214	166	299	182	115	79	244
HGLibA_00744	ADAM18	133	175	314	201	205	253	190
HGLibA_00745	ADAM19	274	60	492	181	129	177	172
HGLibA_00746	ADAM19	122	166	591	217	208	204	52
HGLibA_00747	ADAM19	9	66	0	23	35	86	85
HGLibA_00748	ADAM2	44	116	105	82	22	50	27
HGLibA_00749	ADAM2	230	168	324	170	149	106	92
HGLibA_00750	ADAM2	48	14	7	8	46	63	13
HGLibA_00751	ADAM20	177	108	141	159	122	72	109
HGLibA_00752	ADAM20	82	136	119	21	52	0	77
HGLibA_00753	ADAM20	136	89	152	78	54	50	71
HGLibA_00754	ADAM21	59	25	176	91	48	149	153
HGLibA_00755	ADAM21	211	94	370	191	334	198	135
HGLibA_00756	ADAM21	0	12	70	43	14	45	26
HGLibA_00757	ADAM22	102	42	227	142	47	85	49
HGLibA_00758	ADAM22	74	42	300	20	98	50	54
HGLibA_00759	ADAM22	96	148	344	121	76	130	143
HGLibA_00760	ADAM23	77	81	153	44	18	59	63
HGLibA_00761	ADAM23	24	41	283	56	38	54	0
HGLibA_00762	ADAM23	168	241	381	192	212	217	146
HGLibA_00763	ADAM28	108	80	212	121	48	140	185
HGLibA_00764	ADAM28	18	85	241	81	97	64	56
HGLibA_00765	ADAM28	170	133	217	149	6	47	137
HGLibA_00766	ADAM29	92	126	162	90	40	127	137
HGLibA_00767	ADAM29	54	134	286	125	131	120	28
HGLibA_00768	ADAM29	180	49	92	0	81	160	33
HGLibA_00769	ADAM30	41	44	145	80	159	86	69
HGLibA_00770	ADAM30	62	123	229	48	147	93	105
HGLibA_00771	ADAM30	286	366	638	314	193	336	408
HGLibA_00772	ADAM32	98	179	427	216	166	146	108
HGLibA_00773	ADAM32	556	745	985	351	448	344	455
HGLibA_00774	ADAM32	166	97	357	136	141	229	169
HGLibA_00775	ADAM33	267	145	254	163	130	149	174
HGLibA_00776	ADAM33	305	233	563	175	168	101	183
HGLibA_00777	ADAM33	54	18	188	49	58	79	73
HGLibA_00778	ADAM7	94	95	203	146	91	61	131
HGLibA_00779	ADAM7	183	214	619	263	165	212	292
HGLibA_00780	ADAM7	108	110	158	69	88	137	189
HGLibA_00781	ADAM8	102	53	190	50	130	185	160
HGLibA_00782	ADAM8	79	22	28	90	84	13	37
HGLibA_00783	ADAM8	66	94	228	63	52	59	37
HGLibA_00784	ADAM9	41	22	29	25	43	48	0
HGLibA_00785	ADAM9	178	62	207	185	155	117	120
HGLibA_00786	ADAM9	94	91	42	59	47	236	277
HGLibA_00787	ADAMDEC1	249	89	345	117	43	75	47
HGLibA_00788	ADAMDEC1	70	124	275	6	123	88	74
HGLibA_00789	ADAMDEC1	151	136	121	119	103	67	139
HGLibA_00790	ADAMTS1	161	195	222	131	74	151	101
HGLibA_00791	ADAMTS1	245	159	478	174	247	185	175
HGLibA_00792	ADAMTS1	101	188	241	141	77	71	210
HGLibA_00793	ADAMTS10	71	36	127	125	51	54	35
HGLibA_00794	ADAMTS10	114	77	358	122	60	88	38
HGLibA_00795	ADAMTS10	190	214	359	119	100	174	179
HGLibA_00796	ADAMTS12	48	0	165	117	64	64	25
HGLibA_00797	ADAMTS12	115	149	391	173	204	108	172
HGLibA_00798	ADAMTS12	164	170	182	250	96	137	134
HGLibA_00799	ADAMTS13	132	161	147	166	180	123	55
HGLibA_00800	ADAMTS13	290	235	1003	233	287	202	191
HGLibA_00801	ADAMTS13	110	90	292	145	161	157	88
HGLibA_00802	ADAMTS14	199	134	449	124	109	206	99
HGLibA_00803	ADAMTS14	98	124	344	76	73	177	181
HGLibA_00804	ADAMTS14	20	102	77	8	136	77	9
HGLibA_00805	ADAMTS15	15	42	187	45	52	32	39
HGLibA_00806	ADAMTS15	169	167	223	94	113	162	146
HGLibA_00807	ADAMTS15	9	22	0	9	0	15	38
HGLibA_00808	ADAMTS16	62	67	83	35	50	45	26
HGLibA_00809	ADAMTS16	227	84	514	217	135	75	223
HGLibA_00810	ADAMTS16	142	128	388	129	158	95	100
HGLibA_00811	ADAMTS17	22	33	194	84	61	30	76
HGLibA_00812	ADAMTS17	435	343	870	363	227	500	312
HGLibA_00813	ADAMTS17	19	0	37	0	0	0	2
HGLibA_00814	ADAMTS18	35	60	156	85	126	131	64
HGLibA_00815	ADAMTS18	149	159	301	252	121	115	156
HGLibA_00816	ADAMTS18	84	45	125	19	27	36	0
HGLibA_00817	ADAMTS19	213	191	539	173	144	82	278
HGLibA_00818	ADAMTS19	375	359	732	196	290	291	270
HGLibA_00819	ADAMTS19	56	50	86	141	47	98	100
HGLibA_00820	ADAMTS2	33	81	169	46	73	76	68
HGLibA_00821	ADAMTS2	218	195	608	189	132	225	185
HGLibA_00822	ADAMTS2	74	103	224	121	93	68	57
HGLibA_00823	ADAMTS20	196	140	612	269	120	203	224
HGLibA_00824	ADAMTS20	16	23	84	0	0	62	32
HGLibA_00825	ADAMTS20	184	142	712	221	158	179	109
HGLibA_00826	ADAMTS3	64	106	330	64	62	94	76
HGLibA_00827	ADAMTS3	1	29	108	62	21	13	16
HGLibA_00828	ADAMTS3	146	182	221	142	62	189	110
HGLibA_00829	ADAMTS4	123	111	138	62	76	100	131
HGLibA_00830	ADAMTS4	238	163	369	111	219	324	314
HGLibA_00831	ADAMTS4	127	115	63	90	55	110	114
HGLibA_00832	ADAMTS5	85	43	260	43	11	11	71
HGLibA_00833	ADAMTS5	109	112	165	58	138	109	66
HGLibA_00834	ADAMTS5	44	127	193	169	168	101	105
HGLibA_00835	ADAMTS6	36	46	0	19	41	90	36
HGLibA_00836	ADAMTS6	28	66	0	51	80	24	13
HGLibA_00837	ADAMTS6	161	165	324	206	130	164	55
HGLibA_00838	ADAMTS7	82	12	28	56	39	60	15
HGLibA_00839	ADAMTS7	39	53	184	76	81	49	77
HGLibA_00841	ADAMTS8	167	195	172	70	70	124	67
HGLibA_00842	ADAMTS8	566	336	603	317	467	332	425
HGLibA_00843	ADAMTS8	123	111	133	49	117	98	127
HGLibA_00844	ADAMTS9	85	124	258	141	172	120	88
HGLibA_00845	ADAMTS9	27	153	407	63	57	92	115
HGLibA_00846	ADAMTS9	393	179	563	215	261	273	251
HGLibA_00847	ADAMTSL1	209	192	455	108	177	228	116
HGLibA_00848	ADAMTSL1	190	91	391	154	124	113	171
HGLibA_00849	ADAMTSL1	48	63	202	112	51	28	78
HGLibA_00850	ADAMTSL2	120	137	481	100	75	68	63
HGLibA_00851	ADAMTSL2	137	158	614	197	274	214	198
HGLibA_00852	ADAMTSL2	74	75	92	138	60	68	37
HGLibA_00853	ADAMTSL3	60	17	85	56	31	37	38
HGLibA_00854	ADAMTSL3	0	10	29	22	14	21	0
HGLibA_00855	ADAMTSL3	140	103	400	156	62	137	58
HGLibA_00856	ADAMTSL4	121	188	446	151	139	121	70
HGLibA_00857	ADAMTSL4	50	16	153	26	36	36	39
HGLibA_00858	ADAMTSL4	148	184	311	160	100	185	84
HGLibA_00859	ADAMTSL5	156	36	309	81	188	136	53
HGLibA_00860	ADAMTSL5	51	55	57	28	27	10	52
HGLibA_00861	ADAMTSL5	68	107	583	93	61	36	72
HGLibA_00862	ADAP1	121	27	50	33	15	16	91
HGLibA_00863	ADAP1	525	312	617	526	381	307	533
HGLibA_00864	ADAP1	160	98	115	33	125	82	68
HGLibA_00865	ADAP2	37	45	40	67	56	93	92
HGLibA_00866	ADAP2	97	77	185	31	65	98	89
HGLibA_00867	ADAP2	111	116	218	66	108	96	104
HGLibA_00868	ADAR	47	53	225	71	95	166	76
HGLibA_00869	ADAR	119	82	203	284	156	190	122
HGLibA_00870	ADAR	174	176	420	177	181	132	206
HGLibA_00871	ADARB1	92	35	59	0	0	145	73
HGLibA_00872	ADARB1	132	13	151	86	45	91	39
HGLibA_00873	ADARB1	305	230	433	188	201	299	356
HGLibA_00874	ADARB2	35	0	54	17	19	50	9
HGLibA_00875	ADARB2	192	214	264	68	183	88	121
HGLibA_00876	ADARB2	213	89	233	194	176	155	113
HGLibA_00877	ADAT1	208	184	310	201	250	158	218
HGLibA_00878	ADAT1	88	182	225	227	165	258	241
HGLibA_00879	ADAT1	49	88	84	0	0	0	14
HGLibA_00880	ADAT2	99	73	420	100	83	81	91
HGLibA_00881	ADAT2	226	245	493	290	190	227	144
HGLibA_00882	ADAT2	25	24	47	55	39	15	23
HGLibA_00883	ADAT3	160	48	92	67	88	97	70
HGLibA_00884	ADAT3	58	58	336	47	64	15	58
HGLibA_00885	ADAT3	81	59	115	48	93	70	44
HGLibA_00886	ADC	40	51	154	27	61	90	81
HGLibA_00887	ADC	324	536	751	386	236	358	269
HGLibA_00888	ADC	83	33	156	24	34	39	34
HGLibA_00889	ADCK1	248	76	257	167	198	388	241
HGLibA_00890	ADCK1	83	164	77	38	163	176	206
HGLibA_00891	ADCK1	257	243	464	145	212	226	161
HGLibA_00892	ADCK2	115	59	239	52	72	31	87
HGLibA_00893	ADCK2	33	22	310	53	56	66	74
HGLibA_00894	ADCK2	368	322	498	206	372	222	233
HGLibA_00895	ADCK3	175	74	520	67	91	102	70
HGLibA_00896	ADCK3	162	120	182	124	34	164	38
HGLibA_00897	ADCK3	34	36	242	97	174	74	83
HGLibA_00898	ADCK4	61	105	282	223	115	26	125
HGLibA_00899	ADCK4	72	103	341	80	163	56	145
HGLibA_00900	ADCK4	83	114	245	178	188	248	123
HGLibA_00901	ADCK5	152	120	236	143	43	105	111
HGLibA_00902	ADCK5	227	195	469	255	176	128	145
HGLibA_00903	ADCK5	150	133	254	130	73	200	142
HGLibA_00904	ADCY1	60	41	83	84	71	41	42
HGLibA_00905	ADCY1	278	246	459	338	229	288	159
HGLibA_00906	ADCY1	158	85	120	57	37	89	101
HGLibA_00907	ADCY10	83	103	250	80	92	278	82
HGLibA_00908	ADCY10	132	21	190	130	81	58	105
HGLibA_00909	ADCY10	51	31	192	30	80	83	49
HGLibA_00910	ADCY2	317	196	401	117	173	216	114
HGLibA_00911	ADCY2	149	228	321	147	158	84	113
HGLibA_00912	ADCY2	101	64	338	158	47	117	50
HGLibA_00913	ADCY3	112	83	163	67	107	78	95
HGLibA_00914	ADCY3	187	192	432	201	102	189	233
HGLibA_00915	ADCY3	42	148	82	72	60	100	50
HGLibA_00916	ADCY4	0	27	176	0	0	100	57
HGLibA_00918	ADCY4	106	60	166	53	92	130	110
HGLibA_00919	ADCY5	101	75	247	92	104	82	147
HGLibA_00920	ADCY5	115	74	309	108	202	149	34
HGLibA_00921	ADCY5	159	270	608	143	156	226	196
HGLibA_00922	ADCY6	37	163	60	82	222	83	79
HGLibA_00923	ADCY6	70	91	230	80	92	133	133
HGLibA_00924	ADCY6	29	45	131	22	106	67	83
HGLibA_00925	ADCY7	19	0	345	10	57	1	99
HGLibA_00926	ADCY7	77	48	225	56	49	68	52
HGLibA_00927	ADCY7	129	39	166	120	202	97	96
HGLibA_00928	ADCY8	392	198	633	196	233	288	331
HGLibA_00929	ADCY8	118	62	270	97	75	96	188
HGLibA_00930	ADCY8	155	214	84	120	56	130	59
HGLibA_00931	ADCY9	230	140	658	137	140	126	233
HGLibA_00932	ADCY9	424	369	814	195	321	175	321
HGLibA_00933	ADCY9	114	35	316	20	41	41	34
HGLibA_00934	ADCYAP1	192	124	137	37	46	46	34
HGLibA_00935	ADCYAP1	158	184	392	87	138	106	118
HGLibA_00936	ADCYAP1	28	144	346	71	148	105	121
HGLibA_00937	ADCYAP1R1	68	103	183	49	59	67	95
HGLibA_00938	ADCYAP1R1	73	52	6	46	79	34	67
HGLibA_00939	ADCYAP1R1	108	81	266	89	109	86	114
HGLibA_00940	ADD1	323	131	412	200	208	127	168
HGLibA_00941	ADD1	294	331	659	263	338	312	368
HGLibA_00942	ADD1	177	220	347	184	157	151	200
HGLibA_00943	ADD2	148	182	416	165	132	238	197
HGLibA_00944	ADD2	25	64	136	41	99	113	112
HGLibA_00945	ADD2	333	238	793	250	189	197	169
HGLibA_00946	ADD3	310	277	497	147	219	236	176
HGLibA_00947	ADD3	254	272	653	239	239	232	159
HGLibA_00948	ADD3	87	102	110	72	123	123	77
HGLibA_00949	ADH1A	132	123	372	107	154	242	163
HGLibA_00950	ADH1A	96	75	1	60	49	73	14
HGLibA_00951	ADH1A	160	175	381	138	118	156	159
HGLibA_00952	ADH1B	342	251	677	362	311	449	287
HGLibA_00953	ADH1B	213	123	337	84	93	24	143
HGLibA_00954	ADH1B	109	205	335	207	206	193	167
HGLibA_00955	ADH4	169	86	259	104	130	118	93
HGLibA_00956	ADH4	332	295	586	219	216	288	235
HGLibA_00957	ADH4	26	84	334	152	35	50	79
HGLibA_00958	ADH5	249	227	438	197	216	240	132
HGLibA_00959	ADH5	84	61	170	27	0	0	0
HGLibA_00960	ADH5	107	171	421	144	86	228	72
HGLibA_00961	ADH6	66	25	75	46	74	29	0
HGLibA_00962	ADH6	132	146	283	110	141	252	161
HGLibA_00963	ADH6	16	114	273	54	52	84	52
HGLibA_00964	ADH7	60	144	239	80	52	82	25
HGLibA_00965	ADH7	120	156	253	76	141	138	167
HGLibA_00966	ADH7	81	127	289	99	124	198	102
HGLibA_00967	ADHFE1	69	88	108	114	84	56	53
HGLibA_00968	ADHFE1	209	110	260	187	45	109	198
HGLibA_00969	ADHFE1	0	0	84	0	43	0	19
HGLibA_00970	ADI1	108	64	184	73	109	120	88
HGLibA_00971	ADI1	430	251	519	437	232	307	180
HGLibA_00972	ADI1	168	93	60	121	119	165	220
HGLibA_00973	ADIG	234	156	298	137	146	178	225
HGLibA_00974	ADIG	48	41	182	18	69	13	44
HGLibA_00975	ADIG	235	125	553	218	163	219	165
HGLibA_00976	ADIPOQ	148	130	170	55	84	76	83
HGLibA_00977	ADIPOQ	168	112	391	58	142	76	209
HGLibA_00978	ADIPOQ	137	96	384	125	135	155	108
HGLibA_00979	ADIPOR1	60	65	287	43	73	111	51
HGLibA_00980	ADIPOR1	141	159	344	112	199	51	131
HGLibA_00981	ADIPOR1	122	129	8	90	115	179	179
HGLibA_00982	ADIPOR2	157	37	322	78	121	27	26
HGLibA_00983	ADIPOR2	202	345	923	251	180	139	211
HGLibA_00984	ADIPOR2	83	104	356	147	70	124	40
HGLibA_00985	ADIRF	75	38	128	86	28	92	46
HGLibA_00986	ADIRF	129	211	353	177	71	60	43
HGLibA_00987	ADIRF	127	125	587	62	100	147	183
HGLibA_00988	ADK	70	79	180	130	129	80	50
HGLibA_00989	ADK	111	79	375	74	90	155	61
HGLibA_00990	ADK	81	30	161	83	71	82	83
HGLibA_00991	ADM	148	112	373	158	55	70	94
HGLibA_00992	ADM	278	173	885	161	236	217	287
HGLibA_00993	ADM	44	99	158	97	74	93	205
HGLibA_00994	ADM2	100	82	275	120	77	79	100
HGLibA_00995	ADM2	0	35	0	19	11	8	15
HGLibA_00996	ADM2	72	88	293	65	100	56	74
HGLibA_00997	ADM5	62	108	46	100	59	78	72
HGLibA_00998	ADM5	171	132	400	58	88	107	132
HGLibA_00999	ADM5	23	0	36	0	0	13	0
HGLibA_01000	ADNP	52	90	59	27	2	82	58
HGLibA_01001	ADNP	141	185	519	186	67	260	103
HGLibA_01002	ADNP	110	37	252	85	28	70	69
HGLibA_01003	ADNP2	175	111	442	155	223	218	75
HGLibA_01004	ADNP2	54	44	46	0	14	14	26
HGLibA_01005	ADNP2	104	46	220	22	81	24	49
HGLibA_01006	ADO	2	12	187	42	65	47	15
HGLibA_01007	ADO	98	45	117	62	56	47	13
HGLibA_01008	ADO	42	56	181	10	18	29	72
HGLibA_01009	ADORA1	34	57	102	109	61	35	42
HGLibA_01010	ADORA1	44	60	123	78	154	154	235
HGLibA_01011	ADORA1	403	272	462	171	220	236	192
HGLibA_01012	ADORA2A	59	105	162	58	160	117	201
HGLibA_01013	ADORA2A	75	88	396	87	86	105	77
HGLibA_01014	ADORA2A	237	141	400	79	158	110	121
HGLibA_01015	ADORA2B	148	167	472	144	126	142	173
HGLibA_01016	ADORA2B	54	156	90	115	78	124	110
HGLibA_01017	ADORA2B	26	61	59	59	88	84	96
HGLibA_01018	ADORA3	81	253	467	166	205	48	157
HGLibA_01019	ADORA3	141	82	232	148	77	84	11
HGLibA_01020	ADORA3	54	16	95	0	54	66	81
HGLibA_01021	ADPGK	162	94	379	26	40	79	35
HGLibA_01022	ADPGK	122	125	351	259	129	159	157
HGLibA_01023	ADPGK	271	195	479	163	71	181	147
HGLibA_01024	ADPRH	68	1	126	35	43	52	106
HGLibA_01025	ADPRH	163	178	245	15	164	81	136
HGLibA_01026	ADPRH	0	42	198	19	0	20	54
HGLibA_01027	ADPRHL1	71	49	258	101	110	86	82
HGLibA_01028	ADPRHL1	129	120	222	238	67	216	47
HGLibA_01029	ADPRHL1	189	116	214	70	104	63	101
HGLibA_01030	ADPRHL2	290	192	706	259	177	314	184
HGLibA_01031	ADPRHL2	225	99	321	165	222	204	193
HGLibA_01032	ADPRHL2	188	18	319	112	72	120	109
HGLibA_01033	ADPRM	214	207	562	165	137	99	103
HGLibA_01034	ADPRM	18	113	97	99	55	43	48
HGLibA_01035	ADPRM	21	41	155	31	60	75	92
HGLibA_01036	ADRA1A	75	136	203	76	104	25	77
HGLibA_01037	ADRA1A	394	429	1086	408	322	499	335
HGLibA_01038	ADRA1A	74	19	0	71	47	9	106
HGLibA_01039	ADRA1B	331	357	469	233	129	428	208
HGLibA_01040	ADRA1B	35	105	89	68	68	68	124
HGLibA_01041	ADRA1B	36	92	242	42	167	46	112
HGLibA_01042	ADRA1D	218	214	262	267	134	145	224
HGLibA_01043	ADRA1D	69	214	200	114	141	119	155
HGLibA_01044	ADRA1D	140	47	319	166	32	120	101
HGLibA_01045	ADRA2A	150	143	131	97	71	140	46
HGLibA_01046	ADRA2A	164	128	221	69	55	143	82
HGLibA_01047	ADRA2A	187	137	372	234	103	100	170
HGLibA_01048	ADRA2B	21	22	264	157	44	27	30
HGLibA_01049	ADRA2B	154	48	58	106	58	65	136
HGLibA_01050	ADRA2B	157	42	181	39	74	99	77
HGLibA_01051	ADRA2C	166	111	211	164	178	182	41
HGLibA_01052	ADRA2C	0	26	0	21	23	22	29
HGLibA_01053	ADRA2C	45	165	455	19	15	44	114
HGLibA_01054	ADRB1	454	397	749	301	275	271	258
HGLibA_01055	ADRB1	21	31	218	24	29	40	53
HGLibA_01056	ADRB1	78	46	307	59	84	54	50
HGLibA_01057	ADRB2	100	154	453	142	165	149	100
HGLibA_01058	ADRB2	162	151	526	267	149	137	277
HGLibA_01059	ADRB2	22	35	0	11	0	4	0
HGLibA_01060	ADRB3	218	146	394	156	115	155	254
HGLibA_01061	ADRB3	131	113	275	141	3	105	165
HGLibA_01062	ADRB3	97	73	68	28	13	0	5
HGLibA_01063	ADRBK1	154	137	126	53	87	117	110
HGLibA_01064	ADRBK1	124	156	224	107	114	112	149
HGLibA_01065	ADRBK1	142	79	622	81	127	103	63
HGLibA_01066	ADRBK2	66	42	164	63	92	42	91
HGLibA_01067	ADRBK2	46	41	241	41	58	16	15
HGLibA_01068	ADRBK2	116	214	209	172	154	284	155
HGLibA_01069	ADRM1	273	166	295	105	116	153	132
HGLibA_01070	ADRM1	86	169	331	178	223	153	122
HGLibA_01071	ADRM1	12	0	0	0	0	0	18
HGLibA_01072	ADSL	173	169	423	157	134	135	129
HGLibA_01073	ADSL	55	44	121	65	78	144	115
HGLibA_01074	ADSL	336	76	822	173	180	116	83
HGLibA_01075	ADSS	13	64	174	40	90	17	32
HGLibA_01076	ADSS	126	74	187	146	96	117	120
HGLibA_01077	ADSS	200	177	411	47	124	125	174
HGLibA_01078	ADSSL1	31	59	109	53	72	58	113
HGLibA_01079	ADSSL1	344	276	455	292	345	348	196
HGLibA_01080	ADSSL1	70	78	231	138	137	96	188
HGLibA_01081	ADTRP	55	60	244	54	6	49	99
HGLibA_01082	ADTRP	196	244	235	247	315	122	204
HGLibA_01083	ADTRP	368	308	573	367	380	322	452
HGLibA_01084	AEBP1	175	140	134	63	29	94	79
HGLibA_01085	AEBP1	41	43	78	42	61	13	15
HGLibA_01086	AEBP1	8	90	183	54	77	33	55
HGLibA_01087	AEBP2	110	194	246	156	122	126	173
HGLibA_01088	AEBP2	151	117	92	117	64	121	133
HGLibA_01089	AEBP2	69	124	240	117	96	100	185
HGLibA_01090	AEN	142	75	188	138	103	61	150
HGLibA_01091	AEN	33	40	1	73	21	58	28
HGLibA_01092	AEN	165	128	408	162	65	140	116
HGLibA_01093	AES	168	196	361	120	94	179	220
HGLibA_01094	AES	114	132	93	171	93	68	41
HGLibA_01095	AES	203	111	132	132	139	103	103
HGLibA_01096	AFAP1	300	301	596	179	134	156	81
HGLibA_01097	AFAP1	134	73	141	69	134	85	86
HGLibA_01098	AFAP1	135	225	247	231	167	128	104
HGLibA_01099	AFAP1L1	87	100	285	68	52	107	40
HGLibA_01100	AFAP1L1	91	72	229	74	35	100	96
HGLibA_01101	AFAP1L1	39	65	192	12	69	29	22
HGLibA_01102	AFAP1L2	87	37	346	119	74	173	86
HGLibA_01103	AFAP1L2	156	84	350	136	182	142	93
HGLibA_01104	AFAP1L2	99	76	358	76	69	80	134
HGLibA_01105	AFF1	210	123	276	157	235	201	299
HGLibA_01106	AFF1	222	290	539	166	245	197	210
HGLibA_01107	AFF1	0	0	42	0	25	0	10
HGLibA_01108	AFF2	222	277	382	179	193	143	146
HGLibA_01109	AFF2	61	55	0	33	121	13	63
HGLibA_01110	AFF2	83	138	248	128	145	128	125
HGLibA_01111	AFF3	48	0	0	16	0	19	25
HGLibA_01112	AFF3	254	293	608	231	164	172	235
HGLibA_01113	AFF3	95	106	214	192	100	27	111
HGLibA_01114	AFF4	51	19	53	85	107	40	119
HGLibA_01115	AFF4	31	18	0	13	48	67	74
HGLibA_01116	AFF4	268	250	566	384	296	380	250
HGLibA_01117	AFG3L2	23	35	204	0	27	74	3
HGLibA_01118	AFG3L2	137	149	536	84	45	60	77
HGLibA_01119	AFG3L2	35	97	114	94	114	124	71
HGLibA_01120	AFM	34	47	29	31	77	31	30
HGLibA_01121	AFM	203	319	316	269	203	139	286
HGLibA_01122	AFM	48	98	236	86	10	23	58
HGLibA_01123	AFMID	93	41	381	79	30	86	60
HGLibA_01124	AFMID	110	80	120	28	133	131	114
HGLibA_01125	AFMID	124	186	221	202	95	83	127
HGLibA_01126	AFP	38	84	264	139	134	120	225
HGLibA_01127	AFP	224	208	468	297	394	378	299
HGLibA_01128	AFP	126	58	241	54	99	67	48
HGLibA_01129	AFTPH	49	83	142	26	47	63	58
HGLibA_01130	AFTPH	266	90	488	171	150	140	160
HGLibA_01131	AFTPH	247	206	201	124	219	95	114
HGLibA_01132	AGA	66	56	257	154	92	199	51
HGLibA_01133	AGA	219	97	406	181	171	136	122
HGLibA_01134	AGA	12	109	120	130	118	90	105
HGLibA_01135	AGAP1	58	154	195	131	124	65	154
HGLibA_01136	AGAP1	0	67	258	38	28	103	48
HGLibA_01137	AGAP1	0	37	107	31	4	31	8
HGLibA_01138	AGAP11	139	119	217	69	54	119	174
HGLibA_01139	AGAP11	363	347	406	299	337	287	371
HGLibA_01140	AGAP11	130	100	104	137	66	190	90
HGLibA_01141	AGAP2	62	17	124	32	47	27	68
HGLibA_01142	AGAP2	40	196	174	156	103	39	48
HGLibA_01143	AGAP2	151	73	312	97	190	114	96
HGLibA_01144	AGAP3	94	50	125	23	58	84	120
HGLibA_01145	AGAP3	103	62	230	69	118	28	131
HGLibA_01146	AGAP3	67	43	119	37	60	96	54
HGLibA_01147	AGAP6	243	213	835	87	137	154	277
HGLibA_01148	AGAP4	559	450	2664	302	442	472	570
HGLibA_01149	AGAP5	294	263	612	258	255	346	223
HGLibA_01150	AGAP5	151	94	560	138	134	172	74
HGLibA_01153	AGAP6	224	50	302	104	114	160	136
HGLibA_01154	AGAP6	14	71	103	0	25	26	24
HGLibA_01163	AGAP9	65	31	596	44	61	57	12
HGLibA_01164	AGAP9	170	99	152	139	173	141	121
HGLibA_01165	AGBL1	268	305	696	161	246	137	138
HGLibA_01166	AGBL1	141	89	207	86	85	118	139
HGLibA_01167	AGBL1	96	81	311	86	66	90	38
HGLibA_01168	AGBL2	36	128	263	217	197	146	162
HGLibA_01169	AGBL2	74	134	111	77	97	59	51
HGLibA_01170	AGBL2	317	240	416	238	225	146	193
HGLibA_01171	AGBL3	96	153	110	144	106	112	198
HGLibA_01172	AGBL3	166	187	285	204	223	90	173
HGLibA_01173	AGBL3	229	150	382	282	240	226	192
HGLibA_01174	AGBL4	178	127	362	88	91	64	52
HGLibA_01175	AGBL4	121	90	337	36	214	189	219
HGLibA_01176	AGBL4	98	111	184	80	120	117	81
HGLibA_01177	AGBL5	322	230	444	172	111	204	136
HGLibA_01178	AGBL5	41	47	85	76	45	84	109
HGLibA_01179	AGBL5	128	57	381	47	84	70	24
HGLibA_01180	AGER	151	91	300	149	107	86	64
HGLibA_01181	AGER	126	70	413	183	114	76	103
HGLibA_01182	AGER	96	187	91	190	177	182	204
HGLibA_01183	AGFG1	37	17	150	34	31	20	37
HGLibA_01184	AGFG1	78	105	302	100	116	90	45
HGLibA_01185	AGFG1	74	260	187	201	121	238	147
HGLibA_01186	AGFG2	254	157	300	187	130	165	185
HGLibA_01187	AGFG2	102	100	172	158	112	180	278
HGLibA_01188	AGFG2	48	69	33	55	32	83	65
HGLibA_01189	AGGF1	102	91	194	183	230	155	280
HGLibA_01190	AGGF1	80	45	213	34	31	33	106
HGLibA_01191	AGGF1	112	171	248	51	140	107	97
HGLibA_01192	AGK	192	261	209	210	174	113	111
HGLibA_01193	AGK	59	123	339	198	136	196	151
HGLibA_01194	AGK	224	131	391	173	124	27	168
HGLibA_01195	AGL	34	37	9	82	127	38	113
HGLibA_01196	AGL	97	20	39	20	59	37	18
HGLibA_01197	AGL	113	63	166	133	128	78	43
HGLibA_01198	AGMAT	74	159	129	108	77	92	93
HGLibA_01199	AGMAT	60	98	263	181	52	82	165
HGLibA_01200	AGMAT	55	125	60	48	79	56	8
HGLibA_01201	AGMO	144	125	186	81	62	40	143
HGLibA_01202	AGMO	150	223	275	206	172	169	88
HGLibA_01203	AGMO	79	36	47	84	53	58	94
HGLibA_01204	AGO1	202	202	649	104	144	154	131
HGLibA_01205	AGO1	281	259	631	226	234	337	272
HGLibA_01206	AGO1	102	43	76	103	77	111	160
HGLibA_01207	AGO2	81	151	615	125	211	104	35
HGLibA_01208	AGO2	181	163	319	209	75	62	78
HGLibA_01209	AGO2	22	33	123	39	46	79	85
HGLibA_01210	AGO3	132	84	272	71	81	103	131
HGLibA_01211	AGO3	23	84	41	76	91	63	88
HGLibA_01212	AGO3	186	167	326	37	209	116	102
HGLibA_01213	AGO4	55	29	205	12	14	53	54
HGLibA_01214	AGO4	200	219	247	114	222	225	147
HGLibA_01215	AGO4	100	175	226	63	112	97	131
HGLibA_01216	AGPAT1	294	214	328	110	164	118	153
HGLibA_01217	AGPAT1	66	61	308	94	100	99	42
HGLibA_01218	AGPAT1	197	126	524	203	256	185	235
HGLibA_01219	AGPAT2	44	32	233	94	18	41	66
HGLibA_01220	AGPAT2	83	43	104	29	47	41	45
HGLibA_01221	AGPAT2	303	274	592	125	161	241	243
HGLibA_01222	AGPAT3	120	94	307	68	72	127	191
HGLibA_01223	AGPAT3	87	108	508	73	152	195	183
HGLibA_01224	AGPAT3	202	157	259	230	191	126	116
HGLibA_01225	AGPAT4	312	148	566	144	207	195	155
HGLibA_01226	AGPAT4	95	14	129	66	39	55	61
HGLibA_01227	AGPAT4	12	112	174	40	20	33	31
HGLibA_01228	AGPAT5	85	118	169	22	71	67	65
HGLibA_01229	AGPAT5	69	163	271	88	46	78	74
HGLibA_01230	AGPAT5	12	27	29	24	20	37	13
HGLibA_01231	AGPAT6	148	97	169	204	144	171	116
HGLibA_01232	AGPAT6	90	76	618	50	47	82	30
HGLibA_01233	AGPAT6	68	26	100	2	35	23	0
HGLibA_01234	AGPAT9	12	18	288	54	49	58	31
HGLibA_01235	AGPAT9	274	90	280	170	199	181	221
HGLibA_01236	AGPAT9	75	179	174	30	84	74	88
HGLibA_01237	AGPHD1	209	122	398	186	192	124	150
HGLibA_01238	AGPHD1	102	150	252	145	135	143	154
HGLibA_01239	AGPHD1	108	106	385	156	95	252	147
HGLibA_01240	AGPS	113	130	283	137	50	253	96
HGLibA_01241	AGPS	61	99	239	92	141	63	190
HGLibA_01242	AGPS	112	75	209	37	51	66	36
HGLibA_01243	AGR2	110	194	512	231	192	159	255
HGLibA_01244	AGR2	5	36	55	68	37	5	59
HGLibA_01245	AGR2	142	92	181	179	159	124	143
HGLibA_01246	AGR3	105	20	118	54	133	56	150
HGLibA_01247	AGR3	184	82	144	143	219	284	176
HGLibA_01248	AGR3	63	76	342	143	123	134	75
HGLibA_01249	AGRN	106	193	140	151	55	95	107
HGLibA_01250	AGRN	240	251	325	259	251	225	153
HGLibA_01251	AGRN	3	36	145	89	52	45	52
HGLibA_01252	AGRP	183	85	273	170	193	150	146
HGLibA_01253	AGRP	141	229	454	306	148	220	178
HGLibA_01254	AGRP	185	216	812	127	171	197	153
HGLibA_01255	AGT	272	190	223	233	204	226	246
HGLibA_01256	AGT	116	120	161	62	42	177	75
HGLibA_01257	AGT	19	0	0	12	14	0	0
HGLibA_01258	AGTPBP1	61	93	238	81	121	198	217
HGLibA_01259	AGTPBP1	225	200	402	183	198	267	194
HGLibA_01260	AGTPBP1	168	187	376	172	183	125	71
HGLibA_01261	AGTR1	53	44	167	125	101	79	54
HGLibA_01262	AGTR1	237	108	532	197	44	110	75
HGLibA_01263	AGTR1	84	121	240	123	175	153	149
HGLibA_01264	AGTR2	102	85	386	137	74	132	42
HGLibA_01265	AGTR2	119	128	112	76	124	112	71
HGLibA_01266	AGTR2	77	97	233	132	89	220	95
HGLibA_01267	AGTRAP	36	10	44	35	28	25	13
HGLibA_01268	AGTRAP	275	226	552	130	179	169	197
HGLibA_01269	AGTRAP	100	89	122	82	50	80	164
HGLibA_01270	AGXT	58	35	225	59	37	17	22
HGLibA_01271	AGXT	120	155	207	196	75	149	166
HGLibA_01272	AGXT	38	58	124	22	19	12	30
HGLibA_01273	AGXT2	20	51	162	30	17	47	0
HGLibA_01274	AGXT2	76	6	26	11	17	17	26
HGLibA_01275	AGXT2	144	56	332	165	252	138	159
HGLibA_01276	AGXT2L1	213	164	395	82	111	112	143
HGLibA_01277	AGXT2L1	337	126	248	177	255	227	176
HGLibA_01278	ETNPPL	181	186	259	272	145	183	208
HGLibA_01279	AGXT2L2	38	139	220	16	42	128	56
HGLibA_01280	AGXT2L2	1138	520	1721	609	524	830	773
HGLibA_01281	AGXT2L2	306	295	417	340	166	169	254
HGLibA_01282	AHCTF1	47	62	78	30	31	16	10
HGLibA_01283	AHCTF1	341	414	1046	442	454	557	314
HGLibA_01284	AHCTF1	16	50	115	36	0	81	20
HGLibA_01285	AHCY	93	143	546	98	143	146	94
HGLibA_01286	AHCY	189	186	694	232	218	295	456
HGLibA_01287	AHCY	188	121	149	114	75	126	203
HGLibA_01288	AHCYL1	280	103	428	150	158	199	276
HGLibA_01289	AHCYL1	10	1	154	8	20	15	20
HGLibA_01290	AHCYL1	117	33	309	130	71	36	19
HGLibA_01291	AHCYL2	137	46	303	79	25	40	14
HGLibA_01292	AHCYL2	198	280	1155	194	389	304	341
HGLibA_01293	AHCYL2	79	205	258	47	25	22	83
HGLibA_01294	AHDC1	21	17	0	21	58	59	100
HGLibA_01295	AHDC1	223	106	219	102	92	136	32
HGLibA_01296	AHDC1	44	78	259	65	62	48	99
HGLibA_01297	AHI1	191	100	372	142	142	217	223
HGLibA_01298	AHI1	68	71	127	64	32	115	12
HGLibA_01299	AHI1	10	0	62	10	17	10	10
HGLibA_01300	AHNAK	295	346	629	191	250	220	129
HGLibA_01301	AHNAK	270	180	244	250	179	172	212
HGLibA_01302	AHNAK	98	117	245	45	77	41	146
HGLibA_01303	AHNAK2	138	98	174	29	49	35	110
HGLibA_01304	AHNAK2	31	30	139	48	11	56	36
HGLibA_01305	AHNAK2	37	53	49	54	2	49	29
HGLibA_01306	AHR	156	37	216	79	49	55	22
HGLibA_01307	AHR	269	187	335	230	91	230	267
HGLibA_01308	AHR	22	30	71	12	14	12	30
HGLibA_01309	AHRR	227	131	125	142	46	48	91
HGLibA_01310	AHRR	307	155	364	138	149	82	141
HGLibA_01311	AHRR	82	44	184	54	63	54	68
HGLibA_01312	AHSA1	131	128	426	57	98	126	104
HGLibA_01313	AHSA1	209	263	278	148	223	208	266
HGLibA_01314	AHSA1	84	32	109	94	126	67	86
HGLibA_01315	AHSA2	77	148	190	101	63	118	166
HGLibA_01316	AHSA2	92	108	487	220	112	125	113
HGLibA_01317	AHSA2	55	115	308	104	186	153	54
HGLibA_01318	AHSG	216	100	425	184	249	188	94
HGLibA_01320	AHSG	139	94	285	95	114	78	88
HGLibA_01321	AHSP	68	105	221	116	94	69	81
HGLibA_01322	AHSP	27	53	61	45	24	29	27
HGLibA_01323	AHSP	130	214	541	153	99	221	169
HGLibA_01324	AICDA	105	270	417	150	142	77	91
HGLibA_01325	AICDA	385	155	536	164	247	180	176
HGLibA_01326	AICDA	325	232	393	68	216	253	229
HGLibA_01327	AIDA	179	89	302	137	116	118	157
HGLibA_01328	AIDA	72	62	59	69	81	54	69
HGLibA_01329	AIDA	24	31	0	57	24	0	30
HGLibA_01330	AIF1	97	80	219	84	46	9	55
HGLibA_01331	AIF1	126	94	378	92	112	146	106
HGLibA_01332	AIF1	183	129	382	185	200	125	138
HGLibA_01333	AIF1L	0	40	0	17	41	27	0
HGLibA_01334	AIF1L	113	180	300	107	193	173	123
HGLibA_01335	AIF1L	147	120	562	87	205	67	226
HGLibA_01336	AIFM1	58	21	180	77	77	102	53
HGLibA_01337	AIFM1	129	86	496	190	143	264	157
HGLibA_01338	AIFM1	34	12	357	111	20	107	78
HGLibA_01339	AIFM2	109	72	167	55	14	76	58
HGLibA_01340	AIFM2	8	0	74	13	0	33	15
HGLibA_01341	AIFM2	55	34	74	54	20	0	30
HGLibA_01342	AIFM3	76	30	440	173	72	123	117
HGLibA_01343	AIFM3	110	155	210	146	76	91	38
HGLibA_01344	AIFM3	124	173	447	188	143	333	208
HGLibA_01345	AIG1	126	65	172	84	71	33	67
HGLibA_01346	AIG1	163	212	292	272	199	202	153
HGLibA_01347	AIG1	132	110	179	99	62	135	113
HGLibA_01348	AIM1	146	161	161	202	190	159	113
HGLibA_01349	AIM1	24	0	19	6	4	64	21
HGLibA_01350	AIM1	40	27	137	95	50	139	93
HGLibA_01351	AIM2	83	176	218	69	110	94	152
HGLibA_01352	AIM2	0	0	0	0	0	0	20
HGLibA_01353	AIM2	150	25	152	108	156	92	82
HGLibA_01354	AIMP1	119	117	306	176	109	110	141
HGLibA_01355	AIMP1	63	72	305	104	101	133	133
HGLibA_01356	AIMP1	0	18	0	29	0	17	25
HGLibA_01357	AIMP2	187	94	269	86	168	122	139
HGLibA_01358	AIMP2	415	219	518	268	312	212	328
HGLibA_01359	AIMP2	0	27	23	0	25	11	0
HGLibA_01360	AIP	0	55	89	29	49	56	60
HGLibA_01361	AIP	125	133	143	76	36	174	57
HGLibA_01362	AIP	48	137	221	77	86	65	116
HGLibA_01363	AIPL1	145	141	435	163	215	188	127
HGLibA_01364	AIPL1	43	11	82	0	0	17	34
HGLibA_01365	AIPL1	144	118	66	185	42	100	145
HGLibA_01366	AIRE	44	41	213	102	63	67	49
HGLibA_01367	AIRE	16	15	76	49	53	6	25
HGLibA_01368	AIRE	57	0	239	31	45	101	50
HGLibA_01369	AJAP1	309	152	793	116	106	106	251
HGLibA_01370	AJAP1	167	74	287	127	43	74	42
HGLibA_01371	AJAP1	13	23	0	56	0	0	12
HGLibA_01372	AJUBA	239	141	459	162	242	171	98
HGLibA_01373	AJUBA	65	67	50	27	44	59	84
HGLibA_01374	AJUBA	0	42	0	14	0	14	58
HGLibA_01375	AK1	242	143	459	191	75	297	261
HGLibA_01376	AK1	68	53	138	136	53	84	44
HGLibA_01377	AK1	101	171	266	180	100	147	195
HGLibA_01378	AK2	83	260	335	171	196	236	280
HGLibA_01379	AK2	184	89	350	196	109	124	110
HGLibA_01380	AK2	178	197	617	105	75	227	153
HGLibA_01381	AK3	248	206	502	226	251	114	86
HGLibA_01382	AK3	75	0	37	10	15	29	0
HGLibA_01383	AK3	257	194	520	158	234	228	203
HGLibA_01384	AK4	117	144	448	119	161	182	150
HGLibA_01385	AK4	63	106	169	126	106	178	93
HGLibA_01386	AK4	0	19	14	7	51	8	18
HGLibA_01387	AK5	155	156	220	62	150	194	120
HGLibA_01388	AK5	84	129	245	147	112	163	160
HGLibA_01389	AK5	79	126	17	89	178	101	126
HGLibA_01390	AK6	9	9	31	36	0	0	18
HGLibA_01391	AK6	81	14	552	42	0	49	33
HGLibA_01392	AK6	0	12	0	0	0	0	12
HGLibA_01393	AK7	40	67	114	94	84	53	76
HGLibA_01394	AK7	93	108	232	108	26	84	133
HGLibA_01395	AK7	12	0	0	0	26	23	0
HGLibA_01396	AK8	53	54	162	78	62	27	128
HGLibA_01397	AK8	36	72	421	125	31	96	77
HGLibA_01398	AK8	92	55	211	46	55	55	138
HGLibA_01399	AK9	110	107	316	68	82	66	53
HGLibA_01400	AK9	42	101	32	78	64	39	125
HGLibA_01401	AK9	228	111	657	212	115	211	180
HGLibA_01402	AKAP1	254	247	826	296	278	314	175
HGLibA_01403	AKAP1	52	63	373	42	22	11	32
HGLibA_01404	AKAP1	125	203	264	192	80	93	128
HGLibA_01405	AKAP10	413	272	689	289	293	293	259
HGLibA_01406	AKAP10	160	141	135	171	190	103	46
HGLibA_01407	AKAP10	272	186	252	224	190	226	172
HGLibA_01408	AKAP11	90	135	275	60	55	73	114
HGLibA_01409	AKAP11	242	194	323	191	180	165	192
HGLibA_01410	AKAP11	127	79	226	102	184	250	80
HGLibA_01411	AKAP12	90	88	187	49	112	75	109
HGLibA_01412	AKAP12	56	122	287	106	88	102	150
HGLibA_01413	AKAP12	307	335	777	336	205	284	317
HGLibA_01414	AKAP13	94	171	450	303	131	173	142
HGLibA_01415	AKAP13	138	76	162	88	28	73	28
HGLibA_01416	AKAP13	80	79	3	150	126	125	124
HGLibA_01417	AKAP14	90	78	203	62	192	125	142
HGLibA_01418	AKAP14	34	229	322	200	130	179	130
HGLibA_01419	AKAP14	172	82	278	127	102	67	51
HGLibA_01420	AKAP17A_X	896	600	1209	439	514	321	291
HGLibA_01421	AKAP17A_X	490	401	1391	521	440	440	378
HGLibA_01422	AKAP17A_X	394	427	914	335	384	292	554
HGLibA_01426	AKAP2	164	145	317	182	141	113	143
HGLibA_01427	AKAP2	63	87	162	113	74	60	64
HGLibA_01428	AKAP2	215	112	156	136	202	114	125
HGLibA_01430	AKAP3	76	28	209	67	65	35	135
HGLibA_01431	AKAP3	142	142	110	78	120	59	133
HGLibA_01432	AKAP4	44	37	166	87	78	95	94
HGLibA_01433	AKAP4	76	74	146	106	83	74	99
HGLibA_01434	AKAP4	354	355	597	412	330	436	278
HGLibA_01435	AKAP5	136	106	329	100	68	94	104
HGLibA_01436	AKAP5	151	141	208	134	210	90	152
HGLibA_01437	AKAP5	119	80	255	41	105	180	150
HGLibA_01438	AKAP6	171	326	683	132	282	103	194
HGLibA_01439	AKAP6	228	146	284	88	188	136	57
HGLibA_01440	AKAP6	79	89	104	61	48	15	28
HGLibA_01441	AKAP7	76	41	165	54	51	100	53
HGLibA_01442	AKAP7	41	26	118	70	77	156	22
HGLibA_01443	AKAP7	81	195	151	99	179	150	216
HGLibA_01444	AKAP8	89	39	418	121	94	81	53
HGLibA_01445	AKAP8	114	147	158	168	145	327	275
HGLibA_01446	AKAP8	0	42	40	6	15	14	22
HGLibA_01447	AKAP8L	161	97	135	140	139	136	98
HGLibA_01448	AKAP8L	293	245	285	173	205	245	335
HGLibA_01449	AKAP8L	125	135	302	141	164	120	114
HGLibA_01450	AKAP9	109	242	335	127	102	141	79
HGLibA_01451	AKAP9	76	88	139	6	46	18	56
HGLibA_01452	AKAP9	40	18	141	35	31	17	9
HGLibA_01453	AKIP1	77	107	221	95	122	73	93
HGLibA_01454	AKIP1	111	31	206	76	90	25	44
HGLibA_01455	AKIP1	413	249	665	287	200	336	177
HGLibA_01456	AKIRIN1	155	112	345	96	79	123	100
HGLibA_01457	AKIRIN1	538	638	791	378	350	602	465
HGLibA_01458	AKIRIN1	40	7	43	32	10	54	8
HGLibA_01459	AKIRIN2	0	51	122	50	83	50	125
HGLibA_01460	AKIRIN2	126	120	199	309	294	136	136
HGLibA_01461	AKIRIN2	51	77	177	79	15	147	31
HGLibA_01462	AKNA	259	221	636	261	188	218	269
HGLibA_01463	AKNA	106	38	221	80	75	65	81
HGLibA_01464	AKNA	189	140	161	147	192	224	105
HGLibA_01465	AKNAD1	95	63	48	60	109	95	114
HGLibA_01466	AKNAD1	44	77	128	83	88	91	121
HGLibA_01467	AKNAD1	99	132	338	102	149	117	109
HGLibA_01468	AKR1A1	227	322	463	247	137	217	99
HGLibA_01469	AKR1A1	339	131	308	121	165	122	152
HGLibA_01470	AKR1A1	92	52	180	50	103	68	81
HGLibA_01471	AKR1B1	218	324	677	232	184	212	113
HGLibA_01472	AKR1B1	107	36	29	30	109	87	118
HGLibA_01473	AKR1B1	102	114	195	45	86	100	63
HGLibA_01474	AKR1B10	49	75	218	146	58	78	111
HGLibA_01475	AKR1B10	64	90	0	52	19	23	11
HGLibA_01476	AKR1B10	207	94	239	87	173	48	122
HGLibA_01477	AKR1B15	168	334	454	271	209	287	265
HGLibA_01478	AKR1B15	72	97	336	92	174	154	191
HGLibA_01479	AKR1B15	134	67	148	92	62	72	24
HGLibA_01480	AKR1C1	262	254	524	278	307	609	289
HGLibA_01481	AKR1C1	46	126	188	90	75	58	71
HGLibA_01482	AKR1C1	275	257	392	288	256	391	413
HGLibA_01483	AKR1C2	181	130	412	312	262	132	185
HGLibA_01484	AKR1C2	227	206	279	213	306	202	265
HGLibA_01485	AKR1C2	29	62	113	79	35	40	0
HGLibA_01486	AKR1C3	80	48	216	49	136	188	151
HGLibA_01487	AKR1C3	254	200	357	89	189	146	138
HGLibA_01488	AKR1C3	434	221	851	266	335	262	271
HGLibA_01489	AKR1C4	5	62	64	60	78	120	16
HGLibA_01490	AKR1C4	19	56	147	77	67	129	48
HGLibA_01491	AKR1C4	113	179	345	187	107	154	156
HGLibA_01492	AKR1D1	240	290	822	108	183	132	128
HGLibA_01493	AKR1D1	225	153	499	158	150	163	212
HGLibA_01494	AKR1D1	104	80	224	153	154	76	111
HGLibA_01495	AKR1E2	292	168	416	207	300	188	225
HGLibA_01496	AKR1E2	245	171	144	120	139	175	23
HGLibA_01497	AKR1E2	77	116	177	96	131	84	159
HGLibA_01498	AKR7A2	405	413	999	276	295	323	334
HGLibA_01499	AKR7A2	197	172	387	144	120	174	108
HGLibA_01500	AKR7A2	139	292	734	213	115	323	384
HGLibA_01501	AKR7A3	189	204	246	135	118	135	102
HGLibA_01502	AKR7A3	93	69	154	76	65	68	62
HGLibA_01503	AKR7A3	44	86	230	255	148	222	74
HGLibA_01504	AKT1	187	246	258	102	131	96	127
HGLibA_01505	AKT1	295	292	485	379	186	337	254
HGLibA_01506	AKT1	55	165	562	93	83	104	118
HGLibA_01507	AKT1S1	94	23	179	53	40	32	48
HGLibA_01508	AKT1S1	38	92	331	212	130	174	228
HGLibA_01509	AKT1S1	76	87	137	9	71	52	68
HGLibA_01510	AKT2	121	53	248	86	81	85	134
HGLibA_01511	AKT2	291	342	505	264	309	345	253
HGLibA_01512	AKT2	132	86	201	209	125	125	147
HGLibA_01513	AKT3	132	68	362	47	61	189	107
HGLibA_01514	AKT3	150	122	245	202	124	143	187
HGLibA_01515	AKT3	0	17	50	35	26	6	12
HGLibA_01516	AKTIP	182	151	674	122	204	195	172
HGLibA_01517	AKTIP	232	158	492	242	120	263	124
HGLibA_01518	AKTIP	230	106	321	175	248	181	156
HGLibA_01519	ALAD	143	72	427	45	84	177	132
HGLibA_01520	ALAD	138	51	325	121	94	116	219
HGLibA_01521	ALAD	173	87	420	163	123	145	93
HGLibA_01522	ALAS1	11	10	92	19	14	24	8
HGLibA_01523	ALAS1	145	198	330	165	268	109	193
HGLibA_01524	ALAS1	137	147	265	66	70	161	107
HGLibA_01525	ALAS2	45	43	108	27	39	77	0
HGLibA_01526	ALAS2	204	129	580	78	242	158	176
HGLibA_01527	ALAS2	220	188	273	214	75	172	155
HGLibA_01528	ALB	420	328	451	279	321	210	276
HGLibA_01529	ALB	18	24	16	36	102	17	15
HGLibA_01530	ALB	59	75	108	79	39	128	29
HGLibA_01531	ALCAM	249	96	583	288	286	228	181
HGLibA_01532	ALCAM	167	86	183	234	190	144	137
HGLibA_01533	ALCAM	102	77	386	101	104	212	27
HGLibA_01534	ALDH16A1	18	36	121	11	9	31	12
HGLibA_01535	ALDH16A1	175	61	251	33	144	48	181
HGLibA_01536	ALDH16A1	85	53	160	93	140	165	95
HGLibA_01537	ALDH18A1	111	76	339	161	149	38	83
HGLibA_01538	ALDH18A1	126	77	342	52	141	187	104
HGLibA_01539	ALDH18A1	88	48	130	73	21	129	47
HGLibA_01540	ALDH1A1	106	34	125	63	63	85	100
HGLibA_01541	ALDH1A1	213	74	230	93	159	52	103
HGLibA_01542	ALDH1A1	95	48	184	156	74	122	86
HGLibA_01543	ALDH1A2	52	29	58	17	21	72	35
HGLibA_01544	ALDH1A2	154	169	145	228	81	174	222
HGLibA_01545	ALDH1A2	208	162	309	254	335	167	209
HGLibA_01546	ALDH1A3	47	53	164	47	31	0	78
HGLibA_01547	ALDH1A3	186	90	446	108	107	103	65
HGLibA_01548	ALDH1A3	171	140	455	238	201	170	248
HGLibA_01549	ALDH1B1	65	33	70	13	45	117	51
HGLibA_01550	ALDH1B1	156	259	385	140	170	158	251
HGLibA_01551	ALDH1B1	215	118	345	163	218	214	279
HGLibA_01552	ALDH1L1	192	146	472	211	254	99	114
HGLibA_01553	ALDH1L1	80	29	108	25	37	63	33
HGLibA_01554	ALDH1L1	159	84	620	188	147	249	204
HGLibA_01555	ALDH1L2	135	73	354	79	130	118	128
HGLibA_01556	ALDH1L2	226	216	193	191	108	189	77
HGLibA_01557	ALDH1L2	129	115	177	94	109	129	198
HGLibA_01558	ALDH2	50	110	233	142	90	177	90
HGLibA_01559	ALDH2	18	0	0	0	0	21	0
HGLibA_01560	ALDH2	152	187	189	166	176	84	75
HGLibA_01561	ALDH3A1	261	89	270	146	161	106	77
HGLibA_01562	ALDH3A1	75	105	61	102	92	48	67
HGLibA_01563	ALDH3A1	90	0	23	66	70	87	74
HGLibA_01564	ALDH3A2	281	271	619	269	330	329	309
HGLibA_01565	ALDH3A2	112	147	149	110	173	135	62
HGLibA_01566	ALDH3A2	76	76	423	119	94	187	217
HGLibA_01567	ALDH3B1	212	185	424	251	118	257	180
HGLibA_01569	ALDH3B1	188	198	434	128	186	100	254
HGLibA_01570	ALDH3B2	63	118	304	64	84	101	128
HGLibA_01571	ALDH3B2	376	194	1031	173	150	263	182
HGLibA_01572	ALDH3B2	135	115	409	75	87	111	128
HGLibA_01573	ALDH4A1	132	63	661	84	153	90	130
HGLibA_01574	ALDH4A1	145	126	150	183	202	112	106
HGLibA_01575	ALDH4A1	60	55	151	98	103	59	91
HGLibA_01576	ALDH5A1	76	45	136	50	125	111	67
HGLibA_01577	ALDH5A1	181	34	32	86	43	99	61
HGLibA_01578	ALDH5A1	94	158	261	85	49	62	84
HGLibA_01579	ALDH6A1	145	117	324	246	208	202	104
HGLibA_01580	ALDH6A1	152	121	436	20	52	51	95
HGLibA_01581	ALDH6A1	162	214	358	89	184	120	161
HGLibA_01582	ALDH7A1	171	145	471	118	229	183	165
HGLibA_01583	ALDH7A1	27	24	26	103	21	35	49
HGLibA_01584	ALDH7A1	102	176	165	86	150	169	260
HGLibA_01585	ALDH8A1	144	127	232	229	99	121	133
HGLibA_01586	ALDH8A1	136	115	269	237	176	136	172
HGLibA_01587	ALDH8A1	115	96	152	74	50	47	35
HGLibA_01588	ALDH9A1	86	63	262	0	88	39	47
HGLibA_01589	ALDH9A1	62	8	83	32	40	56	41
HGLibA_01590	ALDH9A1	83	135	83	68	69	72	98
HGLibA_01591	ALDOA	52	90	174	32	30	59	15
HGLibA_01592	ALDOA	53	66	324	71	60	68	63
HGLibA_01593	ALDOA	21	71	230	86	81	126	36
HGLibA_01594	ALDOB	206	205	372	174	239	185	172
HGLibA_01595	ALDOB	365	277	704	282	234	234	317
HGLibA_01596	ALDOB	72	47	282	94	86	175	94
HGLibA_01597	ALDOC	263	122	173	144	128	192	223
HGLibA_01598	ALDOC	172	287	823	234	274	159	253
HGLibA_01599	ALDOC	43	58	189	150	120	92	64
HGLibA_01600	ALG1	90	42	249	133	92	65	72
HGLibA_01601	ALG1	273	122	266	106	84	155	115
HGLibA_01602	ALG1	117	163	290	29	152	87	130
HGLibA_01603	ALG10	253	212	773	98	154	236	221
HGLibA_01604	ALG10	57	101	76	72	99	66	95
HGLibA_01605	ALG10	60	45	0	14	82	0	0
HGLibA_01606	ALG10B	18	87	231	15	37	50	113
HGLibA_01607	ALG10B	470	316	524	350	232	333	233
HGLibA_01608	ALG10B	252	236	222	139	130	242	190
HGLibA_01609	ALG11	26	10	97	20	19	37	52
HGLibA_01610	ALG11	13	12	75	26	16	26	42
HGLibA_01611	ALG11	52	52	70	33	63	70	35
HGLibA_01612	ALG12	201	90	301	130	91	148	155
HGLibA_01613	ALG12	204	143	570	211	253	110	108
HGLibA_01614	ALG12	133	37	315	93	131	101	76
HGLibA_01615	ALG13	247	215	403	156	183	246	146
HGLibA_01616	ALG13	131	77	197	154	94	74	214
HGLibA_01617	ALG13	131	127	200	160	32	95	81
HGLibA_01618	ALG14	127	144	210	20	57	65	35
HGLibA_01619	ALG14	0	17	42	8	0	0	23
HGLibA_01620	ALG14	146	88	191	115	128	129	148
HGLibA_01621	ALG1L	81	70	179	55	68	48	132
HGLibA_01622	ALG1L	26	79	163	37	70	75	128
HGLibA_01623	ALG1L	97	182	132	143	149	150	73
HGLibA_01624	ALG2	139	157	1157	97	144	182	66
HGLibA_01625	ALG2	64	55	363	10	37	23	0
HGLibA_01626	ALG2	184	116	423	147	134	255	149
HGLibA_01627	ALG3	124	117	147	30	46	27	59
HGLibA_01628	ALG3	73	88	141	80	44	48	15
HGLibA_01629	ALG3	78	188	206	182	87	114	111
HGLibA_01630	ALG5	124	105	224	170	135	188	171
HGLibA_01631	ALG5	140	44	224	57	101	202	123
HGLibA_01632	ALG5	76	45	66	256	63	57	61
HGLibA_01633	ALG6	207	189	258	205	226	203	122
HGLibA_01634	ALG6	140	93	142	104	92	116	113
HGLibA_01635	ALG6	115	134	148	164	162	153	228
HGLibA_01636	ALG8	65	154	292	144	96	236	152
HGLibA_01637	ALG8	98	74	265	116	82	216	167
HGLibA_01638	ALG8	196	210	374	208	284	287	175
HGLibA_01639	ALG9	160	147	434	163	162	132	141
HGLibA_01640	ALG9	112	117	411	87	48	74	66
HGLibA_01641	ALG9	0	30	0	9	10	0	25
HGLibA_01642	ALK	407	346	169	218	356	244	298
HGLibA_01643	ALK	128	76	212	11	64	55	61
HGLibA_01644	ALK	52	74	312	96	120	86	133
HGLibA_01645	ALKBH1	254	226	703	203	257	178	288
HGLibA_01646	ALKBH1	82	69	206	46	171	69	59
HGLibA_01647	ALKBH1	169	83	482	123	90	191	72
HGLibA_01648	ALKBH2	20	23	257	75	25	70	83
HGLibA_01649	ALKBH2	101	46	338	113	157	195	69
HGLibA_01650	ALKBH2	202	115	79	127	57	55	108
HGLibA_01651	ALKBH3	235	221	185	136	204	152	116
HGLibA_01652	ALKBH3	71	167	493	239	248	270	267
HGLibA_01653	ALKBH3	166	198	524	129	98	89	72
HGLibA_01654	ALKBH4	147	165	461	86	99	220	181
HGLibA_01655	ALKBH4	55	97	391	63	48	53	217
HGLibA_01656	ALKBH4	90	84	182	86	72	70	55
HGLibA_01657	ALKBH5	204	122	342	77	41	108	95
HGLibA_01658	ALKBH5	72	176	382	171	149	141	166
HGLibA_01659	ALKBH5	0	13	115	44	31	22	16
HGLibA_01660	ALKBH6	194	387	477	307	200	254	188
HGLibA_01661	ALKBH6	195	138	190	248	110	246	152
HGLibA_01662	ALKBH6	30	65	116	115	27	107	86
HGLibA_01663	ALKBH7	172	62	423	77	75	124	70
HGLibA_01664	ALKBH7	86	69	158	68	109	122	65
HGLibA_01665	ALKBH7	27	49	548	76	49	104	37
HGLibA_01666	ALKBH8	111	207	509	123	59	68	105
HGLibA_01667	ALKBH8	188	227	531	92	175	237	141
HGLibA_01668	ALKBH8	51	39	118	116	105	142	120
HGLibA_01669	ALLC	97	101	364	156	104	119	78
HGLibA_01670	ALLC	93	69	291	76	67	158	104
HGLibA_01671	ALLC	11	56	41	16	49	21	0
HGLibA_01672	ALMS1	134	133	204	254	152	58	154
HGLibA_01673	ALMS1	142	222	703	231	81	75	277
HGLibA_01674	ALMS1	30	0	176	31	64	42	27
HGLibA_01675	ALOX12	181	220	495	128	193	166	176
HGLibA_01676	ALOX12	283	234	591	289	176	159	274
HGLibA_01677	ALOX12	251	190	322	161	133	215	149
HGLibA_01678	ALOX12B	187	74	236	73	104	113	161
HGLibA_01679	ALOX12B	104	98	173	94	125	82	109
HGLibA_01680	ALOX12B	190	223	386	169	151	139	148
HGLibA_01681	ALOX15	32	95	28	25	57	59	79
HGLibA_01682	ALOX15	62	18	270	105	34	36	59
HGLibA_01683	ALOX15	146	133	549	125	168	122	148
HGLibA_01684	ALOX15B	93	110	462	99	75	94	162
HGLibA_01685	ALOX15B	210	108	266	148	301	135	125
HGLibA_01686	ALOX15B	161	172	529	134	109	165	109
HGLibA_01687	ALOX5	83	54	229	55	69	115	75
HGLibA_01688	ALOX5	11	12	71	10	6	26	25
HGLibA_01689	ALOX5	67	34	280	98	68	80	58
HGLibA_01690	ALOX5AP	165	34	166	43	58	141	96
HGLibA_01691	ALOX5AP	63	20	44	41	101	84	42
HGLibA_01692	ALOX5AP	119	223	420	74	96	164	56
HGLibA_01693	ALOXE3	26	29	107	13	22	7	51
HGLibA_01694	ALOXE3	106	119	399	116	76	163	131
HGLibA_01695	ALOXE3	118	139	609	136	226	259	216
HGLibA_01696	ALPI	253	117	321	188	152	232	122
HGLibA_01697	ALPI	101	94	347	120	60	180	109
HGLibA_01698	ALPI	538	287	623	292	246	524	296
HGLibA_01699	ALPK1	52	82	190	69	68	24	142
HGLibA_01700	ALPK1	69	171	241	101	113	103	92
HGLibA_01701	ALPK1	27	175	350	55	158	135	178
HGLibA_01702	ALPK2	135	122	196	83	222	109	62
HGLibA_01703	ALPK2	172	103	367	127	120	96	115
HGLibA_01704	ALPK2	27	36	99	116	80	54	76
HGLibA_01705	ALPK3	0	0	12	9	0	0	16
HGLibA_01706	ALPK3	150	299	395	130	110	212	163
HGLibA_01707	ALPK3	32	69	221	90	48	41	55
HGLibA_01708	ALPL	58	118	96	113	101	63	44
HGLibA_01709	ALPL	11	64	81	76	79	160	74
HGLibA_01710	ALPL	18	26	135	74	29	68	38
HGLibA_01711	ALPP	472	242	1211	402	405	365	351
HGLibA_01712	ALPP	138	118	321	113	126	224	65
HGLibA_01713	ALPP	155	225	365	128	117	86	81
HGLibA_01714	ALPPL2	110	91	122	76	135	115	62
HGLibA_01715	ALPPL2	82	75	67	116	129	139	66
HGLibA_01716	ALPPL2	92	126	247	122	105	83	83
HGLibA_01717	ALS2	293	198	610	231	176	210	316
HGLibA_01718	ALS2	309	118	627	122	126	126	74
HGLibA_01719	ALS2	20	14	84	45	6	44	28
HGLibA_01720	ALS2CL	102	125	460	161	103	76	0
HGLibA_01721	ALS2CL	173	112	250	74	159	137	235
HGLibA_01722	ALS2CL	523	452	753	356	288	362	286
HGLibA_01723	ALS2CR11	65	12	156	49	188	59	73
HGLibA_01724	ALS2CR11	99	78	268	45	92	120	103
HGLibA_01725	ALS2CR11	265	145	445	174	138	216	142
HGLibA_01726	ALS2CR12	48	104	30	22	30	25	74
HGLibA_01727	ALS2CR12	131	103	315	144	106	71	50
HGLibA_01728	ALS2CR12	306	103	473	225	211	169	176
HGLibA_01729	ALS2CR8	319	285	218	170	247	313	254
HGLibA_01730	ALS2CR8	85	49	90	162	72	114	146
HGLibA_01731	ALS2CR8	67	46	176	97	69	50	88
HGLibA_01732	ALX1	38	16	79	9	11	16	0
HGLibA_01733	ALX1	275	113	82	187	145	222	165
HGLibA_01734	ALX1	274	124	226	175	85	69	157
HGLibA_01735	ALX3	116	32	115	98	77	109	69
HGLibA_01736	ALX3	134	53	344	149	104	82	59
HGLibA_01737	ALX3	157	131	350	153	122	147	96
HGLibA_01738	ALX4	185	67	380	53	61	118	61
HGLibA_01739	ALX4	15	24	105	41	76	48	110
HGLibA_01740	ALX4	110	19	120	55	72	36	154
HGLibA_01741	ALYREF	110	93	154	95	63	114	93
HGLibA_01742	ALYREF	178	157	451	195	210	154	114
HGLibA_01743	ALYREF	100	223	464	171	68	21	105
HGLibA_01744	AMACR	29	79	117	112	123	164	223
HGLibA_01745	AMACR	14	22	111	25	50	77	56
HGLibA_01746	AMACR	122	118	259	69	95	117	160
HGLibA_01747	AMBN	43	136	118	137	81	149	136
HGLibA_01748	AMBN	56	49	157	90	47	83	121
HGLibA_01749	AMBN	119	176	260	245	125	188	161
HGLibA_01750	AMBP	196	210	347	48	156	181	62
HGLibA_01751	AMBP	137	52	93	56	77	51	113
HGLibA_01752	AMBP	71	69	218	34	42	59	26
HGLibA_01753	AMBRA1	97	114	254	54	103	114	80
HGLibA_01754	AMBRA1	68	47	63	40	63	51	31
HGLibA_01755	AMBRA1	168	166	280	152	144	136	166
HGLibA_01756	AMD1	183	244	468	395	211	268	232
HGLibA_01757	AMD1	120	54	374	127	193	179	162
HGLibA_01758	AMD1	45	8	17	11	39	95	9
HGLibA_01759	AMDHD1	92	50	160	44	44	54	110
HGLibA_01760	AMDHD1	266	171	565	90	144	89	286
HGLibA_01761	AMDHD1	54	41	193	62	53	105	103
HGLibA_01762	AMDHD2	117	155	673	95	152	107	167
HGLibA_01763	AMDHD2	250	78	259	84	40	140	85
HGLibA_01764	AMDHD2	276	123	507	21	103	130	77
HGLibA_01765	AMELX	24	121	198	29	47	104	109
HGLibA_01766	AMELX	270	270	699	383	159	231	205
HGLibA_01767	AMELX	47	74	182	24	78	20	70
HGLibA_01768	AMELY	0	0	0	0	5	0	21
HGLibA_01769	AMELY	36	64	301	129	86	101	63
HGLibA_01770	AMELY	284	267	579	154	101	144	246
HGLibA_01771	AMER1	174	158	224	154	168	114	93
HGLibA_01772	AMER1	161	80	216	78	47	25	55
HGLibA_01773	AMER1	226	313	555	177	285	290	194
HGLibA_01774	AMER2	142	162	282	105	192	167	101
HGLibA_01775	AMER2	183	119	178	63	41	133	95
HGLibA_01776	AMER2	120	60	199	82	55	124	51
HGLibA_01777	AMER3	49	21	39	0	0	46	0
HGLibA_01778	AMER3	89	52	309	88	63	101	81
HGLibA_01779	AMER3	54	49	0	46	0	28	24
HGLibA_01780	AMFR	0	0	115	11	55	19	20
HGLibA_01781	AMFR	0	0	0	23	12	0	0
HGLibA_01782	AMFR	41	71	100	103	56	18	93
HGLibA_01783	AMH	94	111	173	112	82	73	17
HGLibA_01784	AMH	173	129	359	129	50	212	124
HGLibA_01785	AMH	230	186	512	151	150	99	150
HGLibA_01786	AMHR2	84	50	37	82	63	103	63
HGLibA_01787	AMHR2	342	261	802	287	336	251	245
HGLibA_01788	AMHR2	260	135	269	98	128	71	184
HGLibA_01789	AMICA1	140	247	750	227	227	203	158
HGLibA_01790	AMICA1	30	40	46	13	28	24	50
HGLibA_01791	AMICA1	79	86	309	67	73	60	144
HGLibA_01792	AMIGO1	190	72	245	165	176	115	59
HGLibA_01793	AMIGO1	122	155	104	114	34	86	67
HGLibA_01794	AMIGO1	41	33	256	7	1	0	16
HGLibA_01795	AMIGO2	91	113	198	143	67	212	192
HGLibA_01796	AMIGO2	232	180	231	168	63	123	142
HGLibA_01797	AMIGO2	51	23	105	5	39	50	87
HGLibA_01798	AMIGO3	119	149	416	119	169	108	138
HGLibA_01799	AMIGO3	64	166	174	28	86	77	63
HGLibA_01800	AMIGO3	119	116	534	213	149	208	73
HGLibA_01801	AMMECR1	394	188	592	319	297	136	281
HGLibA_01802	AMMECR1	56	0	73	14	29	35	0
HGLibA_01803	AMMECR1	136	167	245	239	153	88	132
HGLibA_01804	AMMECR1L	167	160	630	161	181	173	155
HGLibA_01805	AMMECR1L	102	120	142	16	94	16	13
HGLibA_01806	AMMECR1L	4	11	0	20	13	106	33
HGLibA_01807	AMN	123	93	421	69	59	118	97
HGLibA_01808	AMN	190	96	517	167	66	52	90
HGLibA_01809	AMN	128	35	393	137	78	68	73
HGLibA_01810	AMN1	237	65	168	54	77	83	78
HGLibA_01811	AMN1	65	137	274	171	72	237	161
HGLibA_01812	AMN1	63	114	144	203	164	112	82
HGLibA_01813	AMOT	244	120	317	216	93	108	143
HGLibA_01814	AMOT	197	188	578	325	178	365	258
HGLibA_01815	AMOT	141	32	142	100	126	65	101
HGLibA_01816	AMOTL1	76	114	169	100	118	79	35
HGLibA_01817	AMOTL1	29	119	204	57	54	75	107
HGLibA_01818	AMOTL1	252	121	518	149	90	174	156
HGLibA_01819	AMOTL2	222	198	697	144	205	260	190
HGLibA_01820	AMOTL2	12	18	74	28	50	0	0
HGLibA_01821	AMOTL2	30	0	47	9	9	32	0
HGLibA_01822	AMPD1	200	120	82	156	127	154	201
HGLibA_01823	AMPD1	66	161	275	77	229	168	115
HGLibA_01824	AMPD1	131	148	547	188	225	179	202
HGLibA_01825	AMPD2	141	45	209	84	43	115	58
HGLibA_01826	AMPD2	25	97	162	69	84	76	38
HGLibA_01827	AMPD2	191	166	344	94	178	196	171
HGLibA_01828	AMPD3	190	231	547	113	117	179	63
HGLibA_01829	AMPD3	11	22	91	0	29	44	100
HGLibA_01830	AMPD3	240	185	280	117	89	71	176
HGLibA_01831	AMPH	41	92	130	143	113	95	149
HGLibA_01832	AMPH	129	92	195	100	115	144	97
HGLibA_01833	AMPH	113	114	130	55	154	71	91
HGLibA_01834	AMT	129	94	218	126	139	94	115
HGLibA_01835	AMT	61	15	0	29	12	13	33
HGLibA_01836	AMT	140	124	168	50	101	71	175
HGLibA_01837	AMTN	71	102	155	19	49	0	55
HGLibA_01838	AMTN	97	138	284	197	72	74	205
HGLibA_01839	AMTN	149	136	348	112	62	85	208
HGLibA_01840	AMY2B	121	95	136	146	318	216	174
HGLibA_01841	AMY1C	634	663	951	417	561	600	591
HGLibA_01842	AMY1B	111	73	193	250	209	199	174
HGLibA_01845	AMY1A	393	324	795	401	376	401	332
HGLibA_01846	AMY1C	42	109	248	94	137	80	111
HGLibA_01847	AMY1C	142	190	169	229	207	130	125
HGLibA_01849	AMY2A	44	59	171	110	69	73	75
HGLibA_01851	AMY2A	109	171	297	139	241	208	142
HGLibA_01852	AMY2B	63	30	93	49	84	65	50
HGLibA_01853	AMY2B	158	94	179	156	128	112	217
HGLibA_01854	AMY2B	134	181	338	209	166	288	290
HGLibA_01855	AMZ1	248	206	503	226	154	143	179
HGLibA_01856	AMZ1	97	93	268	89	128	75	145
HGLibA_01857	AMZ1	190	100	627	100	67	124	178
HGLibA_01858	AMZ2	41	71	0	92	15	61	15
HGLibA_01859	AMZ2	76	104	151	52	121	71	81
HGLibA_01860	AMZ2	222	161	559	156	147	208	213
HGLibA_01861	ANAPC1	154	176	149	119	234	173	172
HGLibA_01862	ANAPC1	48	76	18	55	28	67	10
HGLibA_01863	ANAPC1	36	73	61	85	87	91	113
HGLibA_01864	ANAPC10	124	12	163	53	84	74	141
HGLibA_01865	ANAPC10	75	86	224	119	30	45	88
HGLibA_01866	ANAPC10	219	105	285	53	91	110	116
HGLibA_01867	ANAPC11	133	69	627	50	81	51	68
HGLibA_01868	ANAPC11	0	0	0	0	0	17	0
HGLibA_01869	ANAPC11	219	117	451	93	117	226	164
HGLibA_01870	ANAPC13	280	219	575	239	309	240	211
HGLibA_01871	ANAPC13	51	83	226	28	60	55	119
HGLibA_01872	ANAPC13	92	40	329	85	28	106	121
HGLibA_01873	ANAPC15	307	222	318	298	216	234	173
HGLibA_01874	ANAPC15	174	148	291	168	99	52	97
HGLibA_01875	ANAPC15	130	143	197	136	40	77	68
HGLibA_01876	ANAPC16	37	58	109	54	47	40	13
HGLibA_01877	ANAPC16	92	47	225	157	99	90	33
HGLibA_01878	ANAPC16	0	24	179	13	35	61	65
HGLibA_01879	ANAPC2	200	133	383	193	72	156	142
HGLibA_01880	ANAPC2	70	87	100	72	34	14	0
HGLibA_01881	ANAPC2	94	129	611	165	140	196	179
HGLibA_01882	ANAPC4	11	50	118	23	50	79	91
HGLibA_01883	ANAPC4	53	0	73	0	0	29	36
HGLibA_01884	ANAPC4	211	114	321	124	140	271	157
HGLibA_01885	ANAPC5	0	0	0	12	0	0	0
HGLibA_01886	ANAPC5	266	164	768	98	262	205	182
HGLibA_01887	ANAPC5	176	192	834	165	126	106	156
HGLibA_01888	ANAPC7	112	145	500	27	133	33	59
HGLibA_01889	ANAPC7	207	151	359	238	207	280	188
HGLibA_01890	ANAPC7	114	48	208	50	39	84	154
HGLibA_01891	ANG	115	76	107	28	41	58	48
HGLibA_01892	ANG	71	117	258	47	90	39	63
HGLibA_01893	ANG	80	80	295	91	68	72	0
HGLibA_01894	ANGEL1	34	100	216	148	124	143	67
HGLibA_01895	ANGEL1	79	10	164	63	85	110	93
HGLibA_01896	ANGEL1	221	118	237	145	101	169	126
HGLibA_01897	ANGEL2	51	92	221	73	42	101	35
HGLibA_01898	ANGEL2	21	49	139	0	72	65	71
HGLibA_01899	ANGEL2	11	52	129	160	65	96	70
HGLibA_01900	ANGPT1	13	33	51	22	50	0	0
HGLibA_01901	ANGPT1	172	110	282	89	102	151	140
HGLibA_01902	ANGPT1	74	80	285	51	56	116	40
HGLibA_01903	ANGPT2	131	88	518	133	69	145	124
HGLibA_01904	ANGPT2	106	73	125	79	96	121	163
HGLibA_01905	ANGPT2	287	234	493	198	190	219	261
HGLibA_01906	ANGPT4	53	53	111	69	95	99	19
HGLibA_01907	ANGPT4	112	151	210	77	109	76	100
HGLibA_01908	ANGPT4	0	76	129	36	31	58	14
HGLibA_01909	ANGPTL1	249	452	767	495	348	421	441
HGLibA_01910	ANGPTL1	7	35	2	61	91	41	79
HGLibA_01911	ANGPTL1	54	13	159	54	32	64	44
HGLibA_01912	ANGPTL2	110	181	195	224	239	121	240
HGLibA_01913	ANGPTL2	222	187	454	175	151	144	175
HGLibA_01914	ANGPTL2	30	24	71	105	62	84	34
HGLibA_01915	ANGPTL3	67	5	85	17	14	18	17
HGLibA_01916	ANGPTL3	166	184	264	142	86	166	256
HGLibA_01917	ANGPTL3	53	19	130	50	55	26	0
HGLibA_01918	ANGPTL4	104	62	190	238	128	117	128
HGLibA_01919	ANGPTL4	59	25	225	73	38	77	49
HGLibA_01920	ANGPTL4	78	138	167	148	144	124	60
HGLibA_01921	ANGPTL5	148	54	215	147	181	156	167
HGLibA_01922	ANGPTL5	42	6	32	54	13	76	59
HGLibA_01923	ANGPTL5	55	5	234	32	28	18	57
HGLibA_01924	ANGPTL6	314	149	365	64	73	169	253
HGLibA_01925	ANGPTL6	300	215	165	170	250	129	136
HGLibA_01926	ANGPTL6	56	14	232	46	123	77	82
HGLibA_01927	ANGPTL7	39	17	110	38	56	45	55
HGLibA_01928	ANGPTL7	35	29	233	27	0	38	56
HGLibA_01929	ANGPTL7	191	96	408	54	60	153	247
HGLibA_01930	ANHX	291	350	639	252	357	322	339
HGLibA_01931	ANHX	163	117	262	74	137	91	137
HGLibA_01932	ANHX	137	119	212	109	101	61	214
HGLibA_01933	ANK1	181	140	540	81	117	107	103
HGLibA_01934	ANK1	0	0	0	40	55	0	13
HGLibA_01935	ANK1	154	121	244	103	184	74	148
HGLibA_01936	ANK2	333	272	567	304	375	307	343
HGLibA_01937	ANK2	134	98	353	168	97	136	305
HGLibA_01938	ANK2	151	91	407	130	65	81	73
HGLibA_01939	ANK3	192	122	316	122	147	105	215
HGLibA_01940	ANK3	368	384	761	244	135	288	305
HGLibA_01941	ANK3	212	82	336	91	108	120	200
HGLibA_01942	ANKAR	93	84	207	44	19	70	99
HGLibA_01943	ANKAR	71	39	45	29	66	118	31
HGLibA_01944	ANKAR	288	229	808	403	319	337	355
HGLibA_01945	ANKDD1A	170	142	292	203	183	132	153
HGLibA_01946	ANKDD1A	194	145	458	102	120	113	119
HGLibA_01947	ANKDD1A	28	80	203	12	64	60	36
HGLibA_01948	ANKDD1B	90	94	411	123	70	86	145
HGLibA_01949	ANKDD1B	389	197	372	320	510	331	324
HGLibA_01950	ANKDD1B	33	36	155	45	61	48	45
HGLibA_01951	ANKEF1	106	27	181	35	81	118	57
HGLibA_01952	ANKEF1	229	185	272	224	251	81	166
HGLibA_01953	ANKEF1	140	66	49	66	98	69	64
HGLibA_01954	ANKFN1	118	43	59	49	32	23	31
HGLibA_01955	ANKFN1	44	32	108	75	26	71	34
HGLibA_01956	ANKFN1	357	420	731	261	249	232	190
HGLibA_01957	ANKFY1	284	127	411	186	98	210	167
HGLibA_01958	ANKFY1	18	57	223	104	20	43	93
HGLibA_01959	ANKFY1	44	44	97	48	39	67	46
HGLibA_01960	ANKH	207	360	437	274	248	264	201
HGLibA_01961	ANKH	193	164	411	151	131	189	39
HGLibA_01962	ANKH	190	230	450	181	130	192	153
HGLibA_01963	ANKHD1	74	113	293	111	116	40	181
HGLibA_01964	ANKHD1	75	126	280	136	163	180	134
HGLibA_01965	ANKHD1	67	56	0	106	46	16	35
HGLibA_01966	ANKHD1-EIF4EBP3	88	62	245	120	118	62	129
HGLibA_01968	ANKHD1-EIF4EBP3	225	220	482	116	170	153	137
HGLibA_01969	ANKIB1	0	13	153	33	82	8	64
HGLibA_01970	ANKIB1	89	99	281	57	192	129	143
HGLibA_01971	ANKIB1	283	142	439	331	183	247	169
HGLibA_01972	ANKK1	90	133	348	91	98	144	126
HGLibA_01973	ANKK1	41	61	89	111	58	48	37
HGLibA_01974	ANKK1	271	214	482	414	368	240	146
HGLibA_01975	ANKLE2	209	144	277	219	147	244	234
HGLibA_01976	ANKLE2	0	8	167	6	11	0	17
HGLibA_01977	ANKLE2	79	53	22	102	101	88	46
HGLibA_01978	ANKMY1	65	83	235	17	27	73	53
HGLibA_01979	ANKMY1	149	112	265	76	57	121	108
HGLibA_01980	ANKMY1	188	231	316	179	219	290	223
HGLibA_01981	ANKMY2	102	23	58	50	72	54	21
HGLibA_01982	ANKMY2	122	137	248	129	176	227	170
HGLibA_01983	ANKMY2	114	120	529	173	188	106	60
HGLibA_01984	ANKRA2	191	175	443	160	157	182	162
HGLibA_01985	ANKRA2	82	118	228	63	84	200	96
HGLibA_01986	ANKRA2	313	394	587	273	429	319	269
HGLibA_01987	ANKRD1	144	91	275	107	97	148	160
HGLibA_01988	ANKRD1	147	116	153	60	135	188	157
HGLibA_01989	ANKRD1	149	117	316	107	16	141	100
HGLibA_01990	ANKRD10	32	17	0	12	14	3	35
HGLibA_01991	ANKRD10	350	163	468	186	278	137	281
HGLibA_01992	ANKRD10	298	136	622	131	304	187	270
HGLibA_01993	ANKRD11	113	51	322	30	41	35	91
HGLibA_01994	ANKRD11	128	84	120	141	125	83	67
HGLibA_01995	ANKRD11	30	10	80	29	30	0	0
HGLibA_01996	ANKRD12	22	11	22	39	13	13	25
HGLibA_01997	ANKRD12	38	9	134	49	111	114	48
HGLibA_01998	ANKRD12	270	258	302	258	233	323	204
HGLibA_01999	ANKRD13A	104	89	309	108	187	43	144
HGLibA_02000	ANKRD13A	82	64	78	100	86	98	66
HGLibA_02001	ANKRD13A	155	114	693	238	232	181	79
HGLibA_02002	ANKRD13B	115	83	443	85	76	112	54
HGLibA_02003	ANKRD13B	85	34	0	30	34	36	0
HGLibA_02004	ANKRD13B	153	105	82	73	76	77	159
HGLibA_02005	ANKRD13C	215	129	241	133	141	131	160
HGLibA_02006	ANKRD13C	435	299	640	264	190	224	229
HGLibA_02007	ANKRD13C	71	52	71	33	112	165	162
HGLibA_02008	ANKRD13D	22	18	36	13	10	46	13
HGLibA_02009	ANKRD13D	149	58	225	39	77	92	46
HGLibA_02010	ANKRD13D	204	289	264	135	100	137	184
HGLibA_02011	ANKRD16	274	283	488	243	172	236	144
HGLibA_02012	ANKRD16	128	140	399	201	168	307	178
HGLibA_02013	ANKRD16	66	59	105	81	24	120	109
HGLibA_02014	ANKRD17	63	73	103	40	58	104	134
HGLibA_02015	ANKRD17	234	181	540	277	248	260	206
HGLibA_02016	ANKRD17	36	10	81	0	20	37	26
HGLibA_02017	ANKRD18A	339	339	660	215	309	311	232
HGLibA_02018	ANKRD18A	20	63	328	46	62	56	38
HGLibA_02019	ANKRD18A	45	2	0	30	26	64	0
HGLibA_02020	ANKRD18B	41	62	98	30	29	42	17
HGLibA_02021	ANKRD18B	269	337	513	222	185	293	320
HGLibA_02022	ANKRD18B	84	71	234	91	203	121	150
[truncated: 118,673 more rows]
