# Supplementary material for: Ubiquitin ligase STUB1 destabilizes IFNγ-receptor complex to suppress tumor IFNγ signaling
Source: Nat Commun. 2022 Apr 8;13:1923. doi: 10.1038/s41467-022-29442-x (PMC8993893; doi:10.1038/s41467-022-29442-x)
Supplement: Supplementary file 7 — Supplementary Data 3 [file 41467_2022_29442_MOESM7_ESM.xlsx]

## Sheet: Supplementary Data_3_T cell res
gene	log2fold
ENSG00000247809	0.273051
ENSG00000270096	-0.612567
ENSG00000278611	0.514073
ENSG00000147257	-0.756482
ENSG00000273391	0.0591317
ENSG00000279038	0.558901
ENSG00000254860	-0.16648
ENSG00000255559	0.0900028
ENSG00000228393	0.565077
ENSG00000255864	-0.6326
ENSG00000248383	-0.245578
ENSG00000203756	0.512797
ENSG00000159713	0.0744517
ENSG00000200534	0.334051
ENSG00000259363	0.266367
ENSG00000249920	0.105042
ENSG00000279805	0.0809266
ENSG00000276116	1.23255
ENSG00000204779	0.452079
ENSG00000230812	-0.206966
ENSG00000269918	0.19183
ENSG00000124334	1.68103
ENSG00000155657	0.0354096
ENSG00000175356	-1.63168
ENSG00000223735	-0.982186
ENSG00000279943	-0.393938
ENSG00000262601	0.158618
ENSG00000260361	0.596555
ENSG00000165309	0.282168
ENSG00000267280	0.53944
ENSG00000249258	-0.0327378
ENSG00000279320	0.111617
ENSG00000183454	0.126572
ENSG00000241043	0.264138
ENSG00000229994	-0.265457
ENSG00000253485	0.367946
ENSG00000228172	0.0546945
ENSG00000240990	0.166066
ENSG00000260179	-0.470589
ENSG00000156475	1.07175
ENSG00000267296	-1.07163
ENSG00000135697	0.499539
ENSG00000268350	-0.376509
ENSG00000276600	0.175562
ENSG00000274315	-0.121269
ENSG00000229771	-0.0918589
ENSG00000268220	-1.15292
ENSG00000235748	-0.418984
ENSG00000211454	-0.935519
ENSG00000239650	-0.425062
ENSG00000242169	0.45468
ENSG00000232860	0.667489
ENSG00000150594	0.0399314
ENSG00000237917	-0.13219
ENSG00000184492	-0.361861
ENSG00000251194	0.598044
ENSG00000160318	-0.127043
ENSG00000245213	-0.236797
ENSG00000205129	-0.848259
ENSG00000229007	-0.781665
ENSG00000081148	-0.188593
ENSG00000229230	0.405052
ENSG00000280033	-0.25814
ENSG00000260339	0.410304
ENSG00000230071	-0.141858
ENSG00000188687	-0.115572
ENSG00000173991	0.418781
ENSG00000280047	-0.0335314
ENSG00000226026	0.258339
ENSG00000213326	-0.0365509
ENSG00000227331	-1.03429
ENSG00000261359	-0.3976
ENSG00000178852	0.227432
ENSG00000265478	-0.35984
ENSG00000277702	-0.159156
ENSG00000101134	-0.0195169
ENSG00000246090	0.342156
ENSG00000236184	0.196581
ENSG00000167723	0.137064
ENSG00000105808	0.0581838
ENSG00000273154	0.89052
ENSG00000005961	0.228307
ENSG00000269290	-0.137161
ENSG00000224050	1.69185
ENSG00000117148	0.226429
ENSG00000123612	0.273017
ENSG00000196747	0.751728
ENSG00000151090	-0.390623
ENSG00000277287	0.793787
ENSG00000267213	0.320008
ENSG00000261377	-0.647527
ENSG00000270083	-0.173577
ENSG00000114757	-0.0512486
ENSG00000258777	0.132868
ENSG00000270583	0.327645
ENSG00000272301	0.179493
ENSG00000237575	0.723202
ENSG00000255345	0.410989
ENSG00000274997	0.958008
ENSG00000173253	-1.28042
ENSG00000146233	-0.287164
ENSG00000116833	-0.443423
ENSG00000217236	0.560022
ENSG00000102934	0.200707
ENSG00000170801	0.703987
ENSG00000243708	-0.642021
ENSG00000135517	-0.431931
ENSG00000163794	0.748229
ENSG00000176919	-0.394499
ENSG00000177807	0.310524
ENSG00000244219	-0.749556
ENSG00000185168	1.01241
ENSG00000164175	-0.00142623
ENSG00000279539	0.213775
ENSG00000179362	-0.0982503
ENSG00000229227	-1.1231
ENSG00000225655	0.783163
ENSG00000257803	0.48739
ENSG00000125731	0.108385
ENSG00000214049	-0.340085
ENSG00000229299	0.566663
ENSG00000196890	-0.352872
ENSG00000207067	0.365417
ENSG00000248988	0.330497
ENSG00000179817	0.181513
ENSG00000187135	0.0218757
ENSG00000184260	0.939367
ENSG00000184343	0.657543
ENSG00000113231	-0.105822
ENSG00000263006	-0.360068
ENSG00000089163	-0.118115
ENSG00000235098	-0.628954
ENSG00000204397	-0.457022
ENSG00000134042	0.14961
ENSG00000262180	-0.885628
ENSG00000230747	-0.0671199
ENSG00000230393	0.280448
ENSG00000139537	-0.366935
ENSG00000241280	1.0454
ENSG00000203814	0.442008
ENSG00000279342	-0.458251
ENSG00000181031	-0.225039
ENSG00000182795	0.323108
ENSG00000115423	0.226002
ENSG00000133937	-0.151819
ENSG00000225760	0.681454
ENSG00000272677	0.228917
ENSG00000257718	-0.149556
ENSG00000214711	-0.116252
ENSG00000204876	-0.273401
ENSG00000250786	0.0439988
ENSG00000145757	-0.520303
ENSG00000007062	0.0731312
ENSG00000275494	-0.329157
ENSG00000273340	0.184438
ENSG00000215845	-0.294225
ENSG00000280198	0.0967414
ENSG00000179168	-0.26305
ENSG00000227844	0.368386
ENSG00000222020	-0.27274
ENSG00000174951	-0.0317298
ENSG00000228878	-0.0455631
ENSG00000227308	0.235273
ENSG00000234289	0.144155
ENSG00000250120	-0.512736
ENSG00000275056	0.10056
ENSG00000182791	-0.265498
ENSG00000198692	-0.519777
ENSG00000257894	0.212837
ENSG00000228262	0.246239
ENSG00000158220	-0.187819
ENSG00000259380	0.644286
ENSG00000139445	0.628526
ENSG00000259939	0.625372
ENSG00000214725	-0.244673
ENSG00000267405	-0.557584
ENSG00000073754	-0.263623
ENSG00000259605	-0.470803
ENSG00000269570	-0.243186
ENSG00000170122	-0.193384
ENSG00000149634	-0.320144
ENSG00000188001	-0.0501519
ENSG00000266783	-0.743307
ENSG00000214274	-0.765695
ENSG00000172348	0.393113
ENSG00000118432	-0.879345
ENSG00000184716	0.545972
ENSG00000272434	-0.138185
ENSG00000280069	-0.396241
ENSG00000161040	0.915092
ENSG00000143217	-0.599849
ENSG00000248161	0.558135
ENSG00000227694	0.259065
ENSG00000167861	-0.252738
ENSG00000265800	0.265084
ENSG00000268655	0.584252
ENSG00000269514	0.830185
ENSG00000236829	0.205338
ENSG00000267383	-0.832041
ENSG00000272040	-0.802327
ENSG00000256812	0.186533
ENSG00000224805	0.281185
ENSG00000165995	0.942266
ENSG00000226383	0.272016
ENSG00000205444	0.170905
ENSG00000249328	-0.57121
ENSG00000262050	-0.615199
ENSG00000177301	-0.126882
ENSG00000274546	-0.251528
ENSG00000214248	0.55025
ENSG00000259823	0.321413
ENSG00000112238	-0.427827
ENSG00000251666	0.124107
ENSG00000110002	-0.172739
ENSG00000232021	-0.434146
ENSG00000165171	0.378
ENSG00000243819	1.30189
ENSG00000159958	0.263559
ENSG00000196611	0.810845
ENSG00000069122	0.81369
ENSG00000258940	-0.0165234
ENSG00000159166	-0.144932
ENSG00000117600	-0.1685
ENSG00000231527	0.176311
ENSG00000105650	0.622605
ENSG00000169194	0.883519
ENSG00000133665	1.01023
ENSG00000085552	0.188298
ENSG00000279718	-0.161477
ENSG00000167554	0.395083
ENSG00000262413	0.57802
ENSG00000139344	0.144922
ENSG00000177575	0.0717533
ENSG00000188659	0.353425
ENSG00000213754	0.698147
ENSG00000265458	-0.190488
ENSG00000271380	0.01942
ENSG00000099960	1.4133
ENSG00000263327	-0.402465
ENSG00000230701	0.207805
ENSG00000279720	-0.0501558
ENSG00000224023	0.331074
ENSG00000184619	0.540307
ENSG00000258325	0.341209
ENSG00000267096	0.160793
ENSG00000254595	0.136304
ENSG00000275468	1.32677
ENSG00000162595	0.346855
ENSG00000270018	0.339016
ENSG00000226287	-0.045103
ENSG00000214389	-0.257687
ENSG00000059915	0.479013
ENSG00000183248	1.20854
ENSG00000279656	0.45529
ENSG00000268758	0.0333436
ENSG00000239763	-0.272153
ENSG00000249684	0.166117
ENSG00000170162	-0.26664
ENSG00000273204	-0.254346
ENSG00000233611	0.564394
ENSG00000106686	-0.977788
ENSG00000236519	-0.120819
ENSG00000278023	0.143612
ENSG00000259775	0.0923069
ENSG00000234917	0.285154
ENSG00000161958	0.281574
ENSG00000226332	-0.00439424
ENSG00000221916	0.17509
ENSG00000075891	-0.854627
ENSG00000181790	0.737927
ENSG00000232818	-0.0324498
ENSG00000091513	0.626938
ENSG00000260060	0.0650243
ENSG00000252481	-0.155188
ENSG00000144031	0.259196
ENSG00000277662	0.322464
ENSG00000254319	0.0033447
ENSG00000152475	0.374997
ENSG00000178015	-0.293064
ENSG00000235590	-0.311488
ENSG00000256061	-0.159292
ENSG00000166689	-0.542179
ENSG00000258457	0.319481
ENSG00000272323	0.362825
ENSG00000233435	-0.434594
ENSG00000092068	0.597361
ENSG00000273004	0.554336
ENSG00000236723	0.216323
ENSG00000146090	0.0882324
ENSG00000224227	0.128534
ENSG00000259527	0.342418
ENSG00000196366	-0.259633
ENSG00000204338	0.354601
ENSG00000228022	0.671001
ENSG00000121577	-0.454989
ENSG00000264569	-0.0777406
ENSG00000211789	-0.224556
ENSG00000244538	-0.174576
ENSG00000154065	-0.00400304
ENSG00000263069	0.746082
ENSG00000230373	-0.0942447
ENSG00000276261	0.435843
ENSG00000262903	0.490553
ENSG00000173809	0.339541
ENSG00000260101	1.09103
ENSG00000154316	-0.180157
ENSG00000170214	0.561337
ENSG00000279873	0.226576
ENSG00000129159	-1.02527
ENSG00000162105	0.0140656
ENSG00000268061	1.05453
ENSG00000185467	-0.61677
ENSG00000160539	-0.0614999
ENSG00000236683	0.353419
ENSG00000230069	0.316018
ENSG00000272502	0.459877
ENSG00000178662	-0.00165925
ENSG00000261652	-0.410726
ENSG00000229816	0.438621
ENSG00000246777	-0.147362
ENSG00000237886	0.044718
ENSG00000128918	0.386414
ENSG00000278383	-0.197853
ENSG00000105982	0.0636691
ENSG00000136155	-0.316096
ENSG00000261560	0.0543673
ENSG00000250508	0.470964
ENSG00000233170	-0.31555
ENSG00000233554	0.970861
ENSG00000242180	0.193804
ENSG00000267272	0.225363
ENSG00000266088	0.0370425
ENSG00000176054	0.0080129
ENSG00000158825	-0.663286
ENSG00000270419	0.446258
ENSG00000275294	0.597141
ENSG00000235489	-1.43487
ENSG00000273723	-0.0534451
ENSG00000228412	-0.636881
ENSG00000089847	-0.0385809
ENSG00000244349	-0.618985
ENSG00000229808	-0.0517373
ENSG00000236269	0.101725
ENSG00000246575	-0.354145
ENSG00000196358	-0.0584086
ENSG00000177459	-0.16359
ENSG00000188487	0.353686
ENSG00000159556	-0.0083735
ENSG00000226524	-0.279706
ENSG00000278989	-0.0191773
ENSG00000249345	0.103935
ENSG00000166823	-1.11809
ENSG00000273002	-0.371528
ENSG00000234536	0.260243
ENSG00000260190	-0.262397
ENSG00000251056	-1.04852
ENSG00000205209	0.529853
ENSG00000206028	0.221965
ENSG00000250303	1.06863
ENSG00000272853	-0.919441
ENSG00000275638	-0.512387
ENSG00000161860	-0.0616893
ENSG00000267892	0.330324
ENSG00000105131	-0.537133
ENSG00000066185	0.186043
ENSG00000258359	0.431283
ENSG00000270820	-0.433001
ENSG00000274897	0.555538
ENSG00000215512	-0.0401694
ENSG00000280107	0.207083
ENSG00000154102	0.271407
ENSG00000184347	0.128345
ENSG00000205791	0.0230508
ENSG00000205702	0.0347044
ENSG00000211799	0.340949
ENSG00000271452	-0.557652
ENSG00000273448	-0.125931
ENSG00000253476	-0.556078
ENSG00000233388	0.0299762
ENSG00000272195	0.0881572
ENSG00000177272	0.542793
ENSG00000234975	-0.250309
ENSG00000038295	0.465565
ENSG00000272525	0.615156
ENSG00000119946	1.2651
ENSG00000181392	-0.179044
ENSG00000280211	0.339463
ENSG00000164512	-0.137106
ENSG00000250616	-0.472875
ENSG00000205309	0.923412
ENSG00000237310	0.252364
ENSG00000249572	-0.161048
ENSG00000228981	0.203299
ENSG00000132026	0.389088
ENSG00000198915	-0.552539
ENSG00000228817	-0.115889
ENSG00000166510	-0.931581
ENSG00000231871	-0.623071
ENSG00000204758	0.312313
ENSG00000238057	0.701823
ENSG00000111215	0.135286
ENSG00000232411	-0.902043
ENSG00000228389	-0.134267
ENSG00000261379	0.161601
ENSG00000155530	-0.204836
ENSG00000169752	-0.605453
ENSG00000267756	-0.167738
ENSG00000183242	0.160126
ENSG00000187773	0.366762
ENSG00000239332	0.456667
ENSG00000138316	0.071604
ENSG00000262228	0.077424
ENSG00000266896	0.460669
ENSG00000272931	0.758512
ENSG00000213062	-0.0113109
ENSG00000259556	-0.214862
ENSG00000138769	0.151439
ENSG00000113396	-0.130401
ENSG00000248592	-0.434268
ENSG00000118640	-0.0128915
ENSG00000133985	0.257136
ENSG00000236256	0.166374
ENSG00000231125	-0.268189
ENSG00000084628	0.385507
ENSG00000264608	0.143538
ENSG00000233452	0.200507
ENSG00000157890	-0.353801
ENSG00000274422	0.459516
ENSG00000160183	-0.19806
ENSG00000254302	-0.39895
ENSG00000260698	0.33982
ENSG00000226312	-0.266374
ENSG00000179133	-0.104873
ENSG00000231422	0.201046
ENSG00000196427	-0.185047
ENSG00000154914	-0.341695
ENSG00000279048	-0.111475
ENSG00000179826	-0.61953
ENSG00000258884	-0.57867
ENSG00000276354	-0.56454
ENSG00000270177	0.965672
ENSG00000126259	-0.103678
ENSG00000272072	0.0405654
ENSG00000261211	1.11508
ENSG00000062282	0.696171
ENSG00000100298	-0.326929
ENSG00000273253	0.28434
ENSG00000265778	-0.570887
ENSG00000105642	0.0831716
ENSG00000261663	-0.433293
ENSG00000231991	-0.0473456
ENSG00000214821	-0.380507
ENSG00000240371	-0.697237
ENSG00000154537	0.287373
ENSG00000265413	0.0797127
ENSG00000237669	0.0266817
ENSG00000214783	-1.53186
ENSG00000203688	-0.912457
ENSG00000224116	0.348045
ENSG00000213080	0.131516
ENSG00000224577	0.471718
ENSG00000196092	0.176429
ENSG00000266921	0.0830822
ENSG00000259275	0.57721
ENSG00000239620	-0.578851
ENSG00000221883	-0.596783
ENSG00000272223	-0.413883
ENSG00000132821	0.396896
ENSG00000166897	-0.470946
ENSG00000147059	-0.299534
ENSG00000249306	-0.425033
ENSG00000273338	-0.307128
ENSG00000260368	0.184172
ENSG00000155792	0.133581
ENSG00000213123	-0.478084
ENSG00000244734	-0.153455
ENSG00000246528	-0.588396
ENSG00000259663	0.571435
ENSG00000244513	0.286991
ENSG00000231663	0.761652
ENSG00000175084	-0.0331256
ENSG00000262333	-0.338644
ENSG00000228160	0.507546
ENSG00000267249	-0.0371749
ENSG00000226803	-0.962197
ENSG00000258674	-0.159738
ENSG00000172803	0.601386
ENSG00000257303	-0.0480609
ENSG00000260743	0.200928
ENSG00000233818	-0.35288
ENSG00000235065	-0.844816
ENSG00000070190	-0.387924
ENSG00000273783	0.310775
ENSG00000125966	-0.0942396
ENSG00000185607	0.746906
ENSG00000063127	0.0477037
ENSG00000232671	-0.0396793
ENSG00000179603	0.421407
ENSG00000232284	0.212891
ENSG00000265401	0.865039
ENSG00000260193	0.128328
ENSG00000268584	-0.0691393
ENSG00000108786	-0.114927
ENSG00000253210	0.250448
ENSG00000169403	-0.00644258
ENSG00000112812	-0.314114
ENSG00000271614	-0.567467
ENSG00000146005	0.0582891
ENSG00000182257	0.185864
ENSG00000118804	-0.352875
ENSG00000229539	0.38795
ENSG00000261204	0.278881
ENSG00000278156	-0.114926
ENSG00000247416	-0.160048
ENSG00000160801	0.351259
ENSG00000120054	0.448542
ENSG00000272787	0.448542
ENSG00000260490	0.115027
ENSG00000163519	-0.771422
ENSG00000187122	-0.724635
ENSG00000183111	0.614497
ENSG00000243978	0.3377
ENSG00000246263	0.0410502
ENSG00000276840	-0.257135
ENSG00000196653	-0.331487
ENSG00000238142	0.607997
ENSG00000234694	1.05633
ENSG00000277959	0.238126
ENSG00000280073	-0.580475
ENSG00000272768	-0.0711047
ENSG00000273680	-0.30437
ENSG00000243830	-0.0452604
ENSG00000270426	-0.515608
ENSG00000151846	0.404357
ENSG00000231611	-1.235
ENSG00000225335	0.250536
ENSG00000260233	0.346213
ENSG00000248583	0.001891
ENSG00000166676	-0.668267
ENSG00000274751	0.428361
ENSG00000224356	-0.675177
ENSG00000111087	1.05384
ENSG00000174521	-0.0672974
ENSG00000227533	-0.0681705
ENSG00000276980	-0.607531
ENSG00000146411	-0.236922
ENSG00000244617	0.0298123
ENSG00000108370	0.123609
ENSG00000230173	-2.16698
ENSG00000225556	0.975135
ENSG00000234213	-0.0232343
ENSG00000259049	0.189093
ENSG00000169213	-0.291266
ENSG00000175264	-0.141851
ENSG00000278727	0.120379
ENSG00000135519	-0.061604
ENSG00000137726	0.0263091
ENSG00000083067	-0.354206
ENSG00000090534	0.664503
ENSG00000182057	0.493344
ENSG00000274333	0.172887
ENSG00000260317	-0.412565
ENSG00000226754	0.212707
ENSG00000272277	-0.0756637
ENSG00000186231	0.347492
ENSG00000231728	-0.632012
ENSG00000251442	0.257505
ENSG00000241860	0.220315
ENSG00000115009	0.185937
ENSG00000273702	0.605284
ENSG00000173988	-0.239714
ENSG00000132000	-0.490399
ENSG00000279563	-0.0607614
ENSG00000196668	0.377713
ENSG00000272365	0.14095
ENSG00000189149	-0.0303758
ENSG00000233762	0.220549
ENSG00000272979	0.219934
ENSG00000178826	0.194338
ENSG00000134184	0.36101
ENSG00000147606	0.0384473
ENSG00000254598	0.281089
ENSG00000187686	-0.204561
ENSG00000018869	-0.16102
ENSG00000160460	0.378131
ENSG00000115290	-0.259271
ENSG00000223459	0.770214
ENSG00000257591	-0.253526
ENSG00000278493	-0.230349
ENSG00000188747	0.519146
ENSG00000101115	1.07664
ENSG00000205559	-0.152654
ENSG00000111886	0.374778
ENSG00000232070	-0.341603
ENSG00000115523	-0.306089
ENSG00000205578	1.6786
ENSG00000232721	-0.285501
ENSG00000261758	0.195436
ENSG00000280328	-0.0202766
ENSG00000177462	-0.762309
ENSG00000154118	0.079042
ENSG00000242474	-0.209348
ENSG00000224905	-0.708418
ENSG00000185352	-0.155189
ENSG00000232133	-0.389017
ENSG00000091428	-0.315066
ENSG00000235092	0.493213
ENSG00000279901	0.00501436
ENSG00000138792	0.323632
ENSG00000280038	-0.557127
ENSG00000179071	0.20768
ENSG00000172399	0.0424039
ENSG00000278272	-0.72039
ENSG00000236452	0.93147
ENSG00000280129	0.335737
ENSG00000175093	0.259868
ENSG00000078399	0.238511
ENSG00000035664	0.553383
ENSG00000279259	0.0511315
ENSG00000171643	0.69234
ENSG00000170011	0.410712
ENSG00000161955	-0.0116255
ENSG00000110799	0.0665428
ENSG00000150281	0.774507
ENSG00000137975	-0.817151
ENSG00000259287	0.525553
ENSG00000116990	0.109133
ENSG00000211753	-0.00885505
ENSG00000271011	0.221069
ENSG00000105538	0.337087
ENSG00000260018	-0.339735
ENSG00000175003	0.669607
ENSG00000099725	-0.651953
ENSG00000022556	-0.59726
ENSG00000269952	-0.10011
ENSG00000064989	-1.11907
ENSG00000069696	-0.432923
ENSG00000230490	0.433416
ENSG00000185518	-0.362087
ENSG00000254417	-0.526225
ENSG00000248923	0.467363
ENSG00000260997	-0.396234
ENSG00000273295	-0.754767
ENSG00000213707	0.231422
ENSG00000128610	0.232027
ENSG00000262663	0.872529
ENSG00000136383	0.250613
ENSG00000121594	-0.441119
ENSG00000227986	-0.602897
ENSG00000231672	-0.367413
ENSG00000164845	0.608644
ENSG00000279822	-0.0645623
ENSG00000241749	1.0547
ENSG00000163810	-0.404663
ENSG00000244694	0.482618
ENSG00000280164	-0.292184
ENSG00000254300	0.37282
ENSG00000254703	0.492069
ENSG00000178623	-0.228144
ENSG00000228397	0.256193
ENSG00000273026	0.0573414
ENSG00000251555	-0.255707
ENSG00000237927	-0.265283
ENSG00000128268	-0.793591
ENSG00000105427	0.0283583
ENSG00000275673	0.230861
ENSG00000227332	0.0568346
ENSG00000245281	-0.0876715
ENSG00000225813	-0.166875
ENSG00000172717	-0.231106
ENSG00000279355	-0.04953
ENSG00000171766	-0.415863
ENSG00000277151	0.151953
ENSG00000261123	0.295424
ENSG00000165443	-0.170186
ENSG00000164855	0.0174987
ENSG00000182557	-0.218786
ENSG00000279253	-0.0513586
ENSG00000274460	0.169528
ENSG00000266976	-0.0544383
ENSG00000224046	0.370106
ENSG00000173200	-0.144419
ENSG00000225721	0.498398
ENSG00000260589	-0.113759
ENSG00000261408	0.140147
ENSG00000230415	0.870633
ENSG00000205710	-0.272429
ENSG00000213406	-0.218398
ENSG00000147138	0.730213
ENSG00000224066	0.780613
ENSG00000230479	-0.127121
ENSG00000203739	0.393047
ENSG00000256338	-0.349324
ENSG00000099953	-0.103313
ENSG00000134827	0.411689
ENSG00000219163	0.00277696
ENSG00000226859	-0.142172
ENSG00000163536	-0.0506461
ENSG00000275763	-0.0120647
ENSG00000214954	-0.591366
ENSG00000280043	-0.0631555
ENSG00000166145	0.698089
ENSG00000213963	0.0714344
ENSG00000236756	0.444679
ENSG00000246731	-0.0742383
ENSG00000277152	-0.40463
ENSG00000244151	0.384765
ENSG00000168772	-0.362113
ENSG00000260633	-0.760551
ENSG00000073737	-0.268822
ENSG00000174586	0.618626
ENSG00000235706	0.389648
ENSG00000257489	0.0219227
ENSG00000109705	-0.48235
ENSG00000137727	0.326705
ENSG00000271133	0.152756
ENSG00000115896	0.65756
ENSG00000253326	-0.638822
ENSG00000151303	-0.199547
ENSG00000196666	0.32969
ENSG00000257298	-0.78364
ENSG00000185710	-0.172894
ENSG00000231890	-0.604127
ENSG00000258725	0.218294
ENSG00000280132	0.583597
ENSG00000178715	-0.157463
ENSG00000230177	0.111509
ENSG00000259417	0.202285
ENSG00000136881	0.447552
ENSG00000234345	0.360572
ENSG00000272752	-0.349375
ENSG00000261730	-0.184339
ENSG00000134198	-1.04365
ENSG00000197587	0.262396
ENSG00000272374	-0.274052
ENSG00000229419	-0.345565
ENSG00000246283	0.137212
ENSG00000142700	0.316155
ENSG00000231652	0.520486
ENSG00000255062	-0.0434495
ENSG00000232450	0.231201
ENSG00000262468	0.360857
ENSG00000140538	-0.256071
ENSG00000126010	-0.212029
ENSG00000257542	0.724868
ENSG00000259456	0.137655
ENSG00000178026	-0.0212796
ENSG00000278376	-0.844132
ENSG00000259318	0.542909
ENSG00000237094	-0.524452
ENSG00000265393	-0.130806
ENSG00000117013	-0.156018
ENSG00000227252	0.668794
ENSG00000112077	0.136843
ENSG00000079689	-0.190717
ENSG00000141505	-0.310725
ENSG00000236976	0.197139
ENSG00000259706	0.0158382
ENSG00000121089	0.718539
ENSG00000159714	-0.643922
ENSG00000148483	0.333479
ENSG00000076826	0.705872
ENSG00000144596	-0.812395
ENSG00000230342	0.259722
ENSG00000145708	-0.0734934
ENSG00000272667	-0.00847868
ENSG00000270533	0.784643
ENSG00000272189	0.98347
ENSG00000228918	0.288635
ENSG00000163126	-0.123906
ENSG00000142677	0.222191
ENSG00000139970	-0.685652
ENSG00000279568	0.0252424
ENSG00000198590	0.0226254
ENSG00000276007	0.146585
ENSG00000227640	-0.0731712
ENSG00000272606	0.0376138
ENSG00000227627	0.49516
ENSG00000138400	0.0103047
ENSG00000276115	0.0097673
ENSG00000185519	0.760223
ENSG00000259495	0.0915303
ENSG00000213204	-0.535199
ENSG00000243244	-0.116953
ENSG00000260086	-0.321719
ENSG00000218537	0.649941
ENSG00000263272	0.0192694
ENSG00000188897	-0.066248
ENSG00000198870	0.170346
ENSG00000249806	-0.154051
ENSG00000087589	-0.351133
ENSG00000268439	-0.368879
ENSG00000230882	0.00923329
ENSG00000227963	-0.341517
ENSG00000165168	0.316938
ENSG00000204396	0.0811126
ENSG00000272808	0.384339
ENSG00000275793	0.0025165
ENSG00000229127	-1.03107
ENSG00000132329	0.203604
ENSG00000204959	0.283718
ENSG00000276334	0.164864
ENSG00000157064	0.254274
ENSG00000237854	0.101297
ENSG00000235847	-0.56061
ENSG00000100033	-0.455852
ENSG00000276814	-0.167398
ENSG00000135750	0.183266
ENSG00000185442	0.160196
ENSG00000270906	0.23943
ENSG00000261101	-0.363094
ENSG00000260400	0.833082
ENSG00000196218	0.331085
ENSG00000263823	0.0116987
ENSG00000280297	0.0904612
ENSG00000158406	0.183647
ENSG00000169896	-0.0855331
ENSG00000033122	0.52089
ENSG00000177685	0.162209
ENSG00000277767	-1.10906
ENSG00000260259	0.00639113
ENSG00000242622	-0.245129
ENSG00000261096	0.124736
ENSG00000188227	-0.301953
ENSG00000185614	-0.0302774
ENSG00000069812	0.291601
ENSG00000176659	-0.055662
ENSG00000129194	0.481624
ENSG00000148935	0.0132033
ENSG00000272574	-0.773757
ENSG00000125816	0.29767
ENSG00000147246	0.272594
ENSG00000233207	0.396796
ENSG00000269982	0.66358
ENSG00000184206	0.0128804
ENSG00000103316	0.226061
ENSG00000254165	0.152667
ENSG00000072163	0.232375
ENSG00000213071	0.0408209
ENSG00000227766	0.1016
ENSG00000200090	-0.52418
ENSG00000258754	0.355671
ENSG00000237940	0.71736
ENSG00000269693	-1.02686
ENSG00000258704	0.341085
ENSG00000268670	0.520782
ENSG00000235508	-0.759207
ENSG00000213904	-0.101086
ENSG00000250072	0.0406308
ENSG00000251867	0.0235254
ENSG00000228705	0.0569483
ENSG00000279496	0.129538
ENSG00000279803	-0.166257
ENSG00000197191	0.254309
ENSG00000272989	-0.349253
ENSG00000272267	-0.100696
ENSG00000271797	-0.270954
ENSG00000259826	0.718608
ENSG00000105717	-0.152147
ENSG00000206532	0.155987
ENSG00000233325	-0.774911
ENSG00000273145	0.54349
ENSG00000180139	-0.47609
ENSG00000271784	0.256244
ENSG00000223396	-0.305512
ENSG00000185101	-0.552692
ENSG00000004776	0.321834
ENSG00000245498	-0.128414
ENSG00000149201	0.551412
ENSG00000271978	-1.15282
ENSG00000275549	-0.285571
ENSG00000216854	0.109998
ENSG00000256304	0.973982
ENSG00000261594	0.13064
ENSG00000215915	-0.106413
ENSG00000267698	0.197202
ENSG00000255150	0.522644
ENSG00000198416	-0.166749
ENSG00000245552	-0.169964
ENSG00000227285	-0.0126956
ENSG00000279491	0.0766527
ENSG00000104722	0.282431
ENSG00000236330	0.154132
ENSG00000229891	-0.353219
ENSG00000225531	0.101194
ENSG00000260526	-0.227629
ENSG00000224699	0.0069738
ENSG00000272367	-0.109231
ENSG00000176428	-0.0627935
ENSG00000255468	0.0144964
ENSG00000261512	0.890155
ENSG00000186301	0.292534
ENSG00000280195	0.928838
ENSG00000261468	-0.250045
ENSG00000136634	-0.704926
ENSG00000260075	-0.468935
ENSG00000273081	-0.320883
ENSG00000273729	0.0836568
ENSG00000135437	-0.418981
ENSG00000182196	0.43125
ENSG00000226824	0.148238
ENSG00000260604	0.462355
ENSG00000163283	-0.414636
ENSG00000241360	0.697444
ENSG00000117586	0.271156
ENSG00000237264	-0.0872395
ENSG00000242732	0.499089
ENSG00000278976	-0.34191
ENSG00000279744	0.395527
ENSG00000266993	0.00942358
ENSG00000136928	0.729465
ENSG00000177989	0.406402
ENSG00000203865	0.625378
ENSG00000172780	-0.105468
ENSG00000273297	0.100385
ENSG00000261541	-0.00540184
ENSG00000002587	-0.237165
ENSG00000213553	-0.467203
ENSG00000276170	0.376424
ENSG00000205041	-0.226676
ENSG00000116039	0.395305
ENSG00000270878	0.0800706
ENSG00000228522	-0.31735
ENSG00000138606	0.694956
ENSG00000277232	-0.230037
ENSG00000227630	-0.474147
ENSG00000153230	0.398748
ENSG00000121895	0.179406
ENSG00000261126	0.423846
ENSG00000183929	0.489527
ENSG00000234869	-0.333582
ENSG00000237978	0.00274899
ENSG00000006016	-0.0622951
ENSG00000237271	-0.767634
ENSG00000122012	0.227536
ENSG00000237181	0.0451696
ENSG00000272121	-0.156742
ENSG00000270049	0.781328
ENSG00000233382	-0.323196
ENSG00000233175	-0.232503
ENSG00000118997	0.190474
ENSG00000280327	0.113437
ENSG00000267060	-0.600131
ENSG00000225506	0.0629072
ENSG00000233143	0.505299
ENSG00000271971	-0.223236
ENSG00000185482	0.183781
ENSG00000126460	0.370969
ENSG00000179698	-0.364082
ENSG00000106688	-0.142607
ENSG00000272918	-0.52732
ENSG00000232907	-0.287095
ENSG00000166341	0.342011
ENSG00000171385	0.156731
ENSG00000245848	-0.355392
ENSG00000233080	0.298802
ENSG00000272498	0.225955
ENSG00000279670	-0.117547
ENSG00000121101	-0.186921
ENSG00000167874	-0.115639
ENSG00000270039	0.17079
ENSG00000279277	-0.485334
ENSG00000228701	0.069099
ENSG00000198673	0.718399
ENSG00000258824	0.44989
ENSG00000204335	-0.0410346
ENSG00000260289	-0.0500712
ENSG00000250474	-0.347314
ENSG00000277693	-0.295769
ENSG00000267419	-0.0237086
ENSG00000198744	0.622907
ENSG00000234754	0.055236
ENSG00000259659	-0.257322
ENSG00000250770	-0.583559
ENSG00000280316	-0.333296
ENSG00000119227	0.251932
ENSG00000234409	0.102703
ENSG00000166578	-0.190557
ENSG00000176884	-0.094399
ENSG00000231154	0.785231
ENSG00000241313	0.153591
ENSG00000181378	-0.242018
ENSG00000071909	-0.369635
ENSG00000265666	0.277943
ENSG00000258365	0.158543
ENSG00000268129	0.610405
ENSG00000180815	-0.169191
ENSG00000141293	-0.471933
ENSG00000179066	0.289077
ENSG00000136197	-0.191419
ENSG00000273477	0.373687
ENSG00000258472	-0.383739
ENSG00000260949	-0.659539
ENSG00000152763	-0.202606
ENSG00000259834	-0.847256
ENSG00000220201	0.168221
ENSG00000254027	0.260247
ENSG00000149927	0.310844
ENSG00000163081	-0.842045
ENSG00000272630	-0.384602
ENSG00000173110	0.0567583
ENSG00000189157	0.276828
ENSG00000240616	0.528855
ENSG00000237594	-0.0119366
ENSG00000182511	-0.675951
ENSG00000271780	0.341754
ENSG00000183960	-0.710024
ENSG00000241547	-0.0159944
ENSG00000266236	0.0763219
ENSG00000172650	-0.541915
ENSG00000231784	-0.182432
ENSG00000254206	-0.0846409
ENSG00000227855	-0.481821
ENSG00000260518	0.728958
ENSG00000271303	0.58743
ENSG00000167208	0.722351
ENSG00000146700	-0.587837
ENSG00000270175	-0.244165
ENSG00000256894	0.861657
ENSG00000196460	0.0370143
ENSG00000235373	-0.346338
ENSG00000101898	-0.158077
ENSG00000261295	-0.43221
ENSG00000008118	-0.807559
ENSG00000173825	0.852562
ENSG00000262194	-0.274572
ENSG00000228696	-0.0799777
ENSG00000273443	0.176082
ENSG00000241494	0.0359074
ENSG00000261060	-0.15851
ENSG00000146530	0.605692
ENSG00000242641	-0.648279
ENSG00000273284	-0.22177
ENSG00000213186	-0.722412
ENSG00000230615	-0.613409
ENSG00000174963	-0.190163
ENSG00000231584	-0.292064
ENSG00000089558	0.0647654
ENSG00000125378	0.156532
ENSG00000267655	-0.181282
ENSG00000272086	0.164334
ENSG00000165124	-0.0510952
ENSG00000062524	-0.0390239
ENSG00000270108	-0.478755
ENSG00000108622	0.423707
ENSG00000232656	-0.419944
ENSG00000221949	-0.0398076
ENSG00000104055	0.588922
ENSG00000132470	0.00160224
ENSG00000272894	0.112245
ENSG00000171056	0.550741
ENSG00000279953	0.143173
ENSG00000239719	0.126515
ENSG00000260077	-0.34917
ENSG00000263470	-0.218723
ENSG00000135898	0.407038
ENSG00000119703	0.154582
ENSG00000259479	-0.124179
ENSG00000162373	-0.348732
ENSG00000257056	0.267901
ENSG00000229334	0.441902
ENSG00000144152	0.21711
ENSG00000171502	0.285288
ENSG00000262621	0.095801
ENSG00000251323	-0.441053
ENSG00000279518	-0.685568
ENSG00000279611	0.220629
ENSG00000188739	0.116295
ENSG00000230359	-0.13995
ENSG00000145777	0.224939
ENSG00000077522	-0.16079
ENSG00000267270	0.154756
ENSG00000183773	0.107859
ENSG00000136546	-0.256046
ENSG00000242960	0.0290726
ENSG00000122861	-0.0221337
ENSG00000270041	-0.897421
ENSG00000224810	0.0549442
ENSG00000271581	-0.0687127
ENSG00000137841	-0.127083
ENSG00000074317	0.229556
ENSG00000280273	-0.0691383
ENSG00000213801	0.150458
ENSG00000107282	0.710256
ENSG00000277268	0.140838
ENSG00000273007	-0.3914
ENSG00000188004	-0.0320771
ENSG00000184160	-0.8541
ENSG00000280143	0.313348
ENSG00000197721	-0.220254
ENSG00000279198	-0.0660814
ENSG00000187689	0.0589505
ENSG00000279356	-0.338216
ENSG00000113209	-0.631997
ENSG00000146352	-0.541577
ENSG00000270562	-0.301027
ENSG00000279312	-0.128109
ENSG00000228546	0.116571
ENSG00000231852	-0.210997
ENSG00000184530	-0.264819
ENSG00000231806	-1.02821
ENSG00000178301	0.0108416
ENSG00000275902	-0.111681
ENSG00000224411	0.00378048
ENSG00000224738	0.64481
ENSG00000277159	-0.0450798
ENSG00000186086	0.427265
ENSG00000234476	0.579772
ENSG00000176678	-0.101884
ENSG00000261643	-0.0795729
ENSG00000196562	0.0057348
ENSG00000253552	-0.158323
ENSG00000225930	0.126972
ENSG00000118557	-0.00634462
ENSG00000266930	0.295863
ENSG00000268049	0.547171
ENSG00000270964	-0.119714
ENSG00000261770	0.333155
ENSG00000240207	-0.366459
ENSG00000196503	-1.12446
ENSG00000142765	0.0520338
ENSG00000260329	0.364148
ENSG00000275645	-0.433809
ENSG00000243696	0.581477
ENSG00000259726	-0.235526
ENSG00000280061	-0.414506
ENSG00000275198	-0.288791
ENSG00000248323	-0.297161
ENSG00000221821	-0.154424
ENSG00000112293	-0.0167349
ENSG00000081138	-0.155265
ENSG00000261879	-0.147632
ENSG00000278000	0.237745
ENSG00000171462	-0.117811
ENSG00000255176	-0.230767
ENSG00000279605	0.0832575
ENSG00000133808	-0.133584
ENSG00000090554	-0.343184
ENSG00000230042	-0.10177
ENSG00000272947	-0.913919
ENSG00000236056	0.00615876
ENSG00000169627	-0.13288
ENSG00000233966	-0.130012
ENSG00000261777	0.508396
ENSG00000196188	0.531377
ENSG00000233954	0.791868
ENSG00000272899	0.578469
ENSG00000236013	0.267271
ENSG00000242071	-0.595543
ENSG00000171044	0.0387641
ENSG00000269473	-0.073795
ENSG00000124116	-0.141722
ENSG00000257956	-0.101376
ENSG00000134245	0.305967
ENSG00000177694	-0.344932
ENSG00000254402	0.410436
ENSG00000181798	-0.207056
ENSG00000231632	0.133204
ENSG00000275964	0.24358
ENSG00000260806	-0.0703868
ENSG00000053108	-0.695549
ENSG00000235280	0.772238
ENSG00000198835	-0.262473
ENSG00000172005	0.341771
ENSG00000132141	0.278325
ENSG00000101605	-0.334506
ENSG00000178440	0.0460123
ENSG00000276900	0.40665
ENSG00000129521	0.152248
ENSG00000260948	0.430962
ENSG00000251151	-0.106444
ENSG00000267199	-0.240737
ENSG00000267886	0.0895073
ENSG00000274383	-0.422493
ENSG00000272486	0.237369
ENSG00000143365	-0.181994
ENSG00000172733	0.0792124
ENSG00000107317	0.46576
ENSG00000138061	-0.0379467
ENSG00000259291	-0.719564
ENSG00000177875	-0.290626
ENSG00000227542	-0.0088726
ENSG00000156298	0.0477443
ENSG00000272054	-0.189491
ENSG00000072858	0.0691418
ENSG00000103742	-0.179694
ENSG00000082196	-0.338654
ENSG00000233892	-0.575888
ENSG00000128594	0.307854
ENSG00000197046	0.190475
ENSG00000280184	-0.00245199
ENSG00000238058	-0.216851
ENSG00000276718	0.0124153
ENSG00000228741	-0.815344
ENSG00000165807	1.0754
ENSG00000268686	0.220978
ENSG00000115257	-0.0103759
ENSG00000198326	-0.486475
ENSG00000246763	-0.201163
ENSG00000225450	0.0208897
ENSG00000234520	0.541295
ENSG00000167771	-0.0893164
ENSG00000228801	-0.0333278
ENSG00000140807	-0.240339
ENSG00000274213	-0.0449171
ENSG00000249353	-0.155056
ENSG00000132744	0.272666
ENSG00000111837	-0.123528
ENSG00000171174	-0.60092
ENSG00000113749	0.664259
ENSG00000228486	0.777124
ENSG00000240405	0.18556
ENSG00000130783	0.0533004
ENSG00000119943	0.0162764
ENSG00000179292	0.256797
ENSG00000150054	0.151195
ENSG00000140937	0.0960902
ENSG00000240298	-0.19346
ENSG00000259031	-0.576316
ENSG00000078098	0.756561
ENSG00000267940	-0.154707
ENSG00000017427	0.336899
ENSG00000129450	-0.0173752
ENSG00000206077	0.474343
ENSG00000164107	0.335066
ENSG00000233822	-0.244947
ENSG00000250539	0.0202773
ENSG00000260209	0.230492
ENSG00000275719	-0.362158
ENSG00000230189	-0.535552
ENSG00000095370	-0.271873
ENSG00000276073	0.34441
ENSG00000188676	0.164008
ENSG00000181029	0.691837
ENSG00000215912	0.691693
ENSG00000280071	0.0223706
ENSG00000238009	-0.0823118
ENSG00000274104	-0.00348776
ENSG00000224843	-0.411979
ENSG00000164100	-0.173615
ENSG00000269834	-0.213995
ENSG00000279968	-0.125403
ENSG00000178568	-0.118764
ENSG00000230325	0.122059
ENSG00000280401	0.138319
ENSG00000005073	-0.365477
ENSG00000224114	-0.0705147
ENSG00000273488	-0.317752
ENSG00000109846	-0.223041
ENSG00000272518	0.159782
ENSG00000171817	0.0563757
ENSG00000260774	-0.168904
ENSG00000263350	0.358834
ENSG00000236449	-0.272172
ENSG00000184156	0.0460531
ENSG00000131620	0.49941
ENSG00000107562	-0.395691
ENSG00000244627	0.106308
ENSG00000262227	0.313439
ENSG00000239569	0.259777
ENSG00000162706	-0.777802
ENSG00000258711	0.583438
ENSG00000234129	0.164833
ENSG00000162745	-0.874913
ENSG00000272936	-0.246305
ENSG00000272851	0.261128
ENSG00000196793	0.7077
ENSG00000117407	0.187318
ENSG00000244055	0.277185
ENSG00000273210	-0.030529
ENSG00000272071	0.00974342
ENSG00000265992	0.00932633
ENSG00000205085	-0.200651
ENSG00000121361	0.370874
ENSG00000273045	-0.119231
ENSG00000214719	0.159003
ENSG00000268006	0.111303
ENSG00000257576	0.61436
ENSG00000134548	-0.144765
ENSG00000274227	0.138898
ENSG00000273387	-0.0752971
ENSG00000131400	-0.680634
ENSG00000261067	0.141105
ENSG00000277182	0.590679
ENSG00000270102	-0.0378638
ENSG00000269896	-0.736623
ENSG00000134539	0.0647515
ENSG00000231419	0.31839
ENSG00000120949	-0.0484748
ENSG00000214617	0.696016
ENSG00000161180	0.138693
ENSG00000198342	0.0617804
ENSG00000255153	-0.0270212
ENSG00000220848	-0.393907
ENSG00000260398	0.165234
ENSG00000104967	0.106585
ENSG00000279026	0.0647212
ENSG00000280213	-0.39254
ENSG00000248334	-0.454124
ENSG00000135253	0.327895
ENSG00000267481	-0.715748
ENSG00000275401	0.207646
ENSG00000142661	-0.274131
ENSG00000273162	-0.151581
ENSG00000146677	0.781379
ENSG00000272688	0.355535
ENSG00000267264	0.0967823
ENSG00000272993	0.175284
ENSG00000278937	-0.597019
ENSG00000158813	-0.125763
ENSG00000171119	0.274743
ENSG00000270277	-0.370555
ENSG00000234329	-0.0478251
ENSG00000081842	0.139457
ENSG00000167617	0.0414156
ENSG00000130518	-0.0366046
ENSG00000100055	-0.444607
ENSG00000213214	0.324795
ENSG00000235703	0.47013
ENSG00000113205	-0.0480483
ENSG00000272763	0.336891
ENSG00000261353	0.230723
ENSG00000270109	0.202605
ENSG00000182389	0.535768
ENSG00000225106	0.0517309
ENSG00000080224	0.19477
ENSG00000168646	0.416156
ENSG00000257488	0.819081
ENSG00000248774	0.00128474
ENSG00000109321	0.0535171
ENSG00000128604	0.40088
ENSG00000247679	-0.24714
ENSG00000267194	0.0614381
ENSG00000256576	-0.0223868
ENSG00000154263	-0.125031
ENSG00000114646	0.445713
ENSG00000151164	-0.217633
ENSG00000145700	-0.0766297
ENSG00000273305	-0.0537117
ENSG00000261584	-0.082552
ENSG00000214429	0.0133925
ENSG00000197837	0.202103
ENSG00000271918	-0.667492
ENSG00000142347	-0.727582
ENSG00000175106	-0.476301
ENSG00000213689	-0.221544
ENSG00000205078	-0.112416
ENSG00000099957	0.0565462
ENSG00000133019	-0.0988058
ENSG00000163017	0.594325
ENSG00000124602	-0.295501
ENSG00000254681	-0.1832
ENSG00000220685	0.166159
ENSG00000171962	0.466896
ENSG00000254818	-0.142729
ENSG00000237238	-0.563619
ENSG00000276570	-0.0433879
ENSG00000176125	0.0796838
ENSG00000235044	-0.20314
ENSG00000257681	0.173875
ENSG00000272755	-0.159343
ENSG00000261335	-0.197908
ENSG00000128849	0.0794571
ENSG00000267404	0.303499
ENSG00000228451	0.150331
ENSG00000186862	0.413642
ENSG00000255508	0.122487
ENSG00000215302	0.619278
ENSG00000167483	0.177672
ENSG00000157578	-0.559673
ENSG00000276131	0.334712
ENSG00000241978	-0.215927
ENSG00000177599	0.0548671
ENSG00000273343	-0.0192663
ENSG00000186704	0.498016
ENSG00000265933	-0.253293
ENSG00000147041	-0.0909136
ENSG00000169989	0.658223
ENSG00000230454	0.218576
ENSG00000040731	-0.387086
ENSG00000144834	-0.608543
ENSG00000138670	0.408483
ENSG00000253598	0.162978
ENSG00000269928	-0.442663
ENSG00000188763	0.0802463
ENSG00000235863	-0.543581
ENSG00000132749	0.361363
ENSG00000254109	0.571013
ENSG00000175170	-0.102875
ENSG00000268568	-0.216463
ENSG00000150672	0.226525
ENSG00000235217	0.125839
ENSG00000251095	0.0135412
ENSG00000159674	0.326261
ENSG00000004838	0.169545
ENSG00000269069	-0.150315
ENSG00000234498	0.168009
ENSG00000224358	0.0276952
ENSG00000276931	-0.103767
ENSG00000183876	0.56748
ENSG00000183638	0.075774
ENSG00000272902	0.33772
ENSG00000178201	-0.732363
ENSG00000103067	0.152805
ENSG00000185666	0.395112
ENSG00000246985	0.268016
ENSG00000262904	0.119813
ENSG00000261662	0.597605
ENSG00000254531	0.249079
ENSG00000272654	-0.141431
ENSG00000256448	-0.182837
ENSG00000250569	-0.0163126
ENSG00000170166	0.00136
ENSG00000185055	-0.205722
ENSG00000162591	-0.145601
ENSG00000265206	0.160321
ENSG00000275560	-0.0265221
ENSG00000186496	0.0693532
ENSG00000153930	0.427672
ENSG00000272909	-0.235736
ENSG00000230061	-0.344061
ENSG00000228109	-0.0833478
ENSG00000273275	-0.331252
ENSG00000229967	-0.0227463
ENSG00000148600	0.589562
ENSG00000246560	0.347024
ENSG00000153531	0.294108
ENSG00000157734	0.0742212
ENSG00000164849	0.501133
ENSG00000184730	0.448163
ENSG00000277957	-0.320035
ENSG00000169122	-0.535414
ENSG00000263412	-0.132066
ENSG00000261644	0.0831004
ENSG00000274029	-0.448237
ENSG00000198932	0.282452
ENSG00000148541	-0.265369
ENSG00000278662	-0.0543233
ENSG00000277476	0.30558
ENSG00000038945	0.0742417
ENSG00000187796	-0.48282
ENSG00000153253	-0.673622
ENSG00000279838	0.089764
ENSG00000196205	0.190827
ENSG00000266278	0.355666
ENSG00000225778	-0.0191931
ENSG00000241014	0.086413
ENSG00000149633	-0.000887551
ENSG00000224281	0.337852
ENSG00000169994	0.330091
ENSG00000152580	-0.00885148
ENSG00000214401	0.613244
ENSG00000105696	0.318306
ENSG00000260686	-0.349248
ENSG00000085465	0.222486
ENSG00000229953	0.372492
ENSG00000213221	-0.705094
ENSG00000120659	-0.170698
ENSG00000259886	-0.136242
ENSG00000275450	-0.747627
ENSG00000261959	0.597038
ENSG00000203872	0.56308
ENSG00000223551	-0.373992
ENSG00000234851	0.826318
ENSG00000232859	0.115307
ENSG00000243007	0.128376
ENSG00000261254	-0.0869539
ENSG00000274026	-0.135472
ENSG00000188825	0.25687
ENSG00000249111	0.114485
ENSG00000204802	-0.618422
ENSG00000174428	0.15468
ENSG00000185737	0.92002
ENSG00000218980	-0.148773
ENSG00000155011	0.0500412
ENSG00000260924	0.0890797
ENSG00000224418	0.0269598
ENSG00000105929	0.610049
ENSG00000128833	-0.334511
ENSG00000244701	-0.168906
ENSG00000228727	-0.29816
ENSG00000173376	0.718479
ENSG00000264985	0.312311
ENSG00000128573	0.176725
ENSG00000245317	-0.16606
ENSG00000259878	-0.283621
ENSG00000274021	0.690588
ENSG00000196917	-0.365742
ENSG00000090104	-0.178027
ENSG00000257605	-0.129106
ENSG00000243649	0.0608389
ENSG00000142046	0.214401
ENSG00000183570	0.464756
ENSG00000258881	-0.158049
ENSG00000247095	0.274183
ENSG00000206561	-0.295716
ENSG00000120279	0.567356
ENSG00000278997	0.0182944
ENSG00000181097	-0.979725
ENSG00000159618	0.0907309
ENSG00000242798	-0.224489
ENSG00000241769	0.751646
ENSG00000247708	0.294343
ENSG00000280422	0.417371
ENSG00000248476	-0.745089
ENSG00000240498	0.118621
ENSG00000234147	-0.393491
ENSG00000142552	0.0357945
ENSG00000174740	-0.0683849
ENSG00000226091	0.0873172
ENSG00000128165	-0.243019
ENSG00000241170	0.0074836
ENSG00000267288	-0.0865265
ENSG00000187672	-0.698261
ENSG00000204311	0.78865
ENSG00000250404	-0.461184
ENSG00000182584	0.186123
ENSG00000279821	0.190949
ENSG00000172789	0.18731
ENSG00000276728	0.459493
ENSG00000225411	0.0745564
ENSG00000261135	0.340361
ENSG00000273174	0.495515
ENSG00000037280	-0.206706
ENSG00000224424	-0.291362
ENSG00000242861	-0.62671
ENSG00000275880	-0.00875174
ENSG00000225880	-0.103637
ENSG00000203883	-0.0256523
ENSG00000170835	0.727782
ENSG00000061918	0.0295782
ENSG00000259295	0.358452
ENSG00000152076	0.613513
ENSG00000257038	0.281319
ENSG00000254602	-0.158475
ENSG00000167971	0.507501
ENSG00000226496	-0.0573933
ENSG00000101353	-0.254312
ENSG00000251348	0.0283108
ENSG00000240350	0.264606
ENSG00000278991	-0.157076
ENSG00000112599	0.245409
ENSG00000258713	0.0518033
ENSG00000267121	0.43862
ENSG00000146856	0.0186221
ENSG00000268416	-0.234536
ENSG00000275055	0.882879
ENSG00000223529	-0.347938
ENSG00000160323	0.311168
ENSG00000272142	-0.641899
ENSG00000215769	-0.0768785
ENSG00000176909	0.21559
ENSG00000240038	-0.12338
ENSG00000236432	-0.750736
ENSG00000133401	-0.0762666
ENSG00000279794	0.116598
ENSG00000279118	-0.152251
ENSG00000113296	-0.188978
ENSG00000225265	-0.687448
ENSG00000274677	0.156114
ENSG00000260655	-0.270701
ENSG00000169918	0.125112
ENSG00000145864	0.0677564
ENSG00000272777	-0.0390643
ENSG00000269925	-0.11971
ENSG00000253636	-0.234213
ENSG00000188013	-0.382401
ENSG00000273576	-0.207321
ENSG00000130829	-0.0396992
ENSG00000226806	0.264402
ENSG00000173805	0.00194615
ENSG00000278916	0.327134
ENSG00000140795	-0.74833
ENSG00000165449	-0.813723
ENSG00000128652	0.333734
ENSG00000184906	0.358145
ENSG00000213058	-0.108758
ENSG00000177640	-0.819032
ENSG00000103241	-0.021771
ENSG00000145287	0.307293
ENSG00000140368	0.320904
ENSG00000129990	-0.103816
ENSG00000129991	0.146797
ENSG00000279692	0.409605
ENSG00000213433	-0.143237
ENSG00000224934	0.20279
ENSG00000164089	0.0609039
ENSG00000256984	0.325356
ENSG00000280332	0.463089
ENSG00000268912	-0.132157
ENSG00000272750	-0.129048
ENSG00000228889	-0.177796
ENSG00000242338	0.505372
ENSG00000247121	0.0121954
ENSG00000248131	-0.0950217
ENSG00000101670	0.682713
ENSG00000229621	-0.337662
ENSG00000186567	-0.322609
ENSG00000204540	-0.472454
ENSG00000109832	-0.0386246
ENSG00000160207	0.189023
ENSG00000233355	-0.289257
ENSG00000232611	-0.373409
ENSG00000255310	0.809505
ENSG00000270060	-0.363694
ENSG00000214198	0.122458
ENSG00000223658	-0.604298
ENSG00000278175	-0.291347
ENSG00000237037	0.107436
ENSG00000261801	0.14983
ENSG00000128408	0.405993
ENSG00000204947	0.186102
ENSG00000138759	0.816671
ENSG00000080561	0.354552
ENSG00000273486	-0.061384
ENSG00000267632	0.0247237
ENSG00000274220	0.690199
ENSG00000223473	0.392363
ENSG00000273447	-0.18772
ENSG00000176912	0.311545
ENSG00000174137	0.303306
ENSG00000277342	0.607998
ENSG00000225975	0.26417
ENSG00000186897	0.264036
ENSG00000197360	0.518655
ENSG00000253426	-0.053809
ENSG00000244731	-0.00199214
ENSG00000266918	0.137615
ENSG00000163827	-0.202338
ENSG00000100027	-0.0896142
ENSG00000224687	-0.131489
ENSG00000135314	-0.179971
ENSG00000279673	-0.237765
ENSG00000275713	0.0625433
ENSG00000121270	0.0549682
ENSG00000245248	0.377902
ENSG00000248445	0.329785
ENSG00000213512	-0.620685
ENSG00000111341	-0.00139174
ENSG00000267030	-0.648788
ENSG00000025423	0.312354
ENSG00000260236	0.330177
ENSG00000226853	0.343307
ENSG00000260727	1.19329
ENSG00000255517	-0.133937
ENSG00000272263	0.514061
ENSG00000256050	-0.156335
ENSG00000146910	-0.211804
ENSG00000184227	-0.356422
ENSG00000244274	-0.219562
ENSG00000261136	-0.368458
ENSG00000120664	0.0325325
ENSG00000270885	0.61237
ENSG00000273888	-0.145897
ENSG00000197506	-0.0843802
ENSG00000205639	0.240361
ENSG00000237819	-0.551017
ENSG00000272505	0.683939
ENSG00000181982	-0.131147
ENSG00000270091	-0.725328
ENSG00000203288	0.03211
ENSG00000131781	-0.169247
ENSG00000234619	-0.0825704
ENSG00000232160	-0.0152626
ENSG00000131471	0.222946
ENSG00000122188	0.0126615
ENSG00000067601	-0.34638
ENSG00000259612	0.175507
ENSG00000248479	0.144727
ENSG00000224959	0.142624
ENSG00000261140	0.11346
ENSG00000251143	0.656481
ENSG00000150051	-0.283759
ENSG00000101306	-0.601552
ENSG00000256806	0.133328
ENSG00000127589	-0.438545
ENSG00000064886	-0.480609
ENSG00000275601	-0.451569
ENSG00000166106	0.0678184
ENSG00000184719	-0.0743237
ENSG00000154330	-0.235036
ENSG00000272807	-0.2852
ENSG00000258944	-0.165543
ENSG00000196951	-0.15209
ENSG00000150625	-0.124013
ENSG00000196220	0.253336
ENSG00000226121	-0.160794
ENSG00000239445	0.414983
ENSG00000240859	0.259564
ENSG00000205583	0.365533
ENSG00000253540	-0.095629
ENSG00000164694	-0.066782
ENSG00000155754	0.0765787
ENSG00000224389	-0.116278
ENSG00000260461	0.483422
ENSG00000111907	0.643742
ENSG00000266777	0.207465
ENSG00000066468	-0.19711
ENSG00000183281	-0.0915519
ENSG00000182968	0.0973607
ENSG00000155465	-0.153361
ENSG00000260025	-0.341547
ENSG00000212864	0.49506
ENSG00000166507	-0.380169
ENSG00000123700	0.349866
ENSG00000273320	0.954189
ENSG00000257207	0.771168
ENSG00000250486	-0.00319594
ENSG00000065717	-0.158782
ENSG00000280099	0.157723
ENSG00000167363	0.354373
ENSG00000234062	0.228275
ENSG00000167549	-0.18684
ENSG00000259408	-0.221277
ENSG00000261840	0.219009
ENSG00000102962	-0.159111
ENSG00000279722	0.213743
ENSG00000181350	-0.14419
ENSG00000124140	0.339948
ENSG00000173404	-0.31525
ENSG00000237697	-0.0672268
ENSG00000169508	-0.272064
ENSG00000116661	-0.224177
ENSG00000264575	0.0437927
ENSG00000173567	0.413534
ENSG00000280079	0.334802
ENSG00000146021	0.413918
ENSG00000165874	-0.152667
ENSG00000249565	-0.32086
ENSG00000278238	0.0613323
ENSG00000175426	-0.515153
ENSG00000278126	-0.540047
ENSG00000115274	-0.129312
ENSG00000226763	0.303855
ENSG00000189068	-0.597406
ENSG00000226124	0.173986
ENSG00000164283	-0.111093
ENSG00000137098	-0.162859
ENSG00000218073	1.00159
ENSG00000262576	0.554991
ENSG00000187172	-0.279476
ENSG00000251365	-0.195937
ENSG00000260912	-0.0210126
ENSG00000069712	0.191454
ENSG00000183305	0.30797
ENSG00000185630	-0.0465044
ENSG00000249087	-0.267317
ENSG00000273352	0.197783
ENSG00000267058	0.109653
ENSG00000133561	-0.394611
ENSG00000248643	-0.386212
ENSG00000235400	-0.066748
ENSG00000234264	0.126389
ENSG00000182308	-0.0568315
ENSG00000257557	0.0429668
ENSG00000261737	-0.55158
ENSG00000172215	-0.45697
ENSG00000261327	0.552702
ENSG00000053524	0.567423
ENSG00000171121	-0.373516
ENSG00000267547	-0.297591
ENSG00000187699	-0.0267704
ENSG00000243232	-0.135261
ENSG00000162804	-0.190767
ENSG00000141527	0.13994
ENSG00000135407	-0.100853
ENSG00000172382	-0.39824
ENSG00000256092	0.159324
ENSG00000254413	0.0986715
ENSG00000175147	0.283627
ENSG00000238286	0.170566
ENSG00000224397	0.148562
ENSG00000272425	0.292539
ENSG00000120068	0.138057
ENSG00000135298	-0.18953
ENSG00000254505	-0.347112
ENSG00000141506	-0.478885
ENSG00000203497	0.191615
ENSG00000080511	0.662954
ENSG00000234160	0.29788
ENSG00000228436	-0.57525
ENSG00000149926	0.313621
ENSG00000229021	-0.127869
ENSG00000258768	-0.66345
ENSG00000104953	0.567122
ENSG00000187955	-0.301362
ENSG00000258733	-0.337833
ENSG00000267475	0.448624
ENSG00000236423	-0.314989
ENSG00000125851	0.506745
ENSG00000152779	0.435008
ENSG00000261455	-0.130635
ENSG00000260219	0.00131506
ENSG00000231817	-0.370321
ENSG00000278949	-0.00546112
ENSG00000275854	-0.328883
ENSG00000141622	0.0691826
ENSG00000271334	-0.340927
ENSG00000175785	0.238169
ENSG00000255624	0.232265
ENSG00000261534	-0.256726
ENSG00000213881	-0.516555
ENSG00000130751	-0.0259058
ENSG00000240399	0.149298
ENSG00000276449	0.121195
ENSG00000224712	0.0726575
ENSG00000121413	-0.184969
ENSG00000273382	0.373445
ENSG00000272150	-0.600202
ENSG00000104894	0.255853
ENSG00000182168	-0.256884
ENSG00000272800	0.187702
ENSG00000214391	-0.323343
ENSG00000260136	-0.165769
ENSG00000188372	-0.105659
ENSG00000254827	0.567397
ENSG00000101230	-0.774032
ENSG00000261542	-1.08378
ENSG00000254535	-0.350824
ENSG00000129946	0.268777
ENSG00000227199	-0.341382
ENSG00000266714	0.238909
ENSG00000258875	-0.37765
ENSG00000205045	0.0217921
ENSG00000180660	-0.060249
ENSG00000262766	-0.186737
ENSG00000272173	-0.15618
ENSG00000166349	0.119197
ENSG00000273148	-0.0113508
ENSG00000184368	0.186397
ENSG00000258429	0.378653
ENSG00000215022	0.356608
ENSG00000011347	0.0531975
ENSG00000256591	-0.351916
ENSG00000249855	-0.0373096
ENSG00000154240	0.252863
ENSG00000228672	0.365199
ENSG00000242615	-0.317807
ENSG00000261572	-0.168321
ENSG00000106852	0.451257
ENSG00000170775	-0.0832188
ENSG00000253159	0.413573
ENSG00000224886	-0.634309
ENSG00000152049	-0.101652
ENSG00000183979	0.192621
ENSG00000267414	-0.148322
ENSG00000230896	-0.0858683
ENSG00000126264	-0.0373019
ENSG00000232653	-0.146342
ENSG00000229474	-0.358726
ENSG00000177453	0.176357
ENSG00000162878	-0.174704
ENSG00000125384	-0.0594162
ENSG00000116035	0.241416
ENSG00000162461	0.121252
ENSG00000224271	-0.0950897
ENSG00000115239	-0.694754
ENSG00000080709	-0.168171
ENSG00000132639	-0.306661
ENSG00000203797	0.406001
ENSG00000280161	0.103062
ENSG00000250988	-0.273825
ENSG00000267397	-0.0981988
ENSG00000125122	0.455643
ENSG00000239351	-0.564708
ENSG00000164776	-0.453965
ENSG00000119725	-0.050119
ENSG00000135502	0.147513
ENSG00000183813	-0.0805574
ENSG00000279069	0.367122
ENSG00000267248	-0.282007
ENSG00000277782	0.162099
ENSG00000173535	-0.348425
ENSG00000160999	0.276718
ENSG00000196337	-0.290666
ENSG00000072694	0.317839
ENSG00000279133	-0.113093
ENSG00000280383	0.118404
ENSG00000187634	-0.0547409
ENSG00000145861	0.195403
ENSG00000157927	0.396767
ENSG00000243667	-0.42667
ENSG00000132965	-0.363548
ENSG00000279602	0.301642
ENSG00000273203	-0.010757
ENSG00000237188	-0.204658
ENSG00000236778	-0.566498
ENSG00000186446	-0.474293
ENSG00000242759	0.308596
ENSG00000227258	0.00711395
ENSG00000155629	-0.491708
ENSG00000260063	-0.125671
ENSG00000150527	-0.10183
ENSG00000251161	0.166299
ENSG00000278897	-0.41643
ENSG00000219626	0.134012
ENSG00000230699	0.500836
ENSG00000105877	0.422076
ENSG00000095539	0.433457
ENSG00000225200	-0.0289201
ENSG00000231595	0.156501
ENSG00000141837	0.399991
ENSG00000125872	0.153202
ENSG00000254815	1.00042
ENSG00000105784	0.272781
ENSG00000064787	0.359497
ENSG00000254473	0.144905
ENSG00000227953	-0.361266
ENSG00000128536	-0.269662
ENSG00000148053	-0.572534
ENSG00000150667	-0.13097
ENSG00000266490	-0.0461057
ENSG00000135436	0.197847
ENSG00000224152	0.387142
ENSG00000104903	-0.162286
ENSG00000113805	0.144246
ENSG00000235903	0.348918
ENSG00000105246	-0.214542
ENSG00000230532	0.175773
ENSG00000268543	-0.154053
ENSG00000232310	-0.518711
ENSG00000143590	-0.223261
ENSG00000262712	0.277774
ENSG00000258708	-0.237728
ENSG00000116885	0.584685
ENSG00000266947	0.105787
ENSG00000105880	0.809319
ENSG00000176472	-0.0168985
ENSG00000278828	-0.147283
ENSG00000275180	-0.48534
ENSG00000188452	0.0541368
ENSG00000213658	0.35855
ENSG00000182165	0.167437
ENSG00000069482	0.38377
ENSG00000230149	-0.194294
ENSG00000235180	0.129937
ENSG00000248103	0.210224
ENSG00000277687	-0.134592
ENSG00000129535	0.0552614
ENSG00000215014	0.361375
ENSG00000159208	-0.302018
ENSG00000104611	0.380164
ENSG00000272579	-0.146438
ENSG00000197816	-0.355894
ENSG00000259098	0.151956
ENSG00000179899	-0.184353
ENSG00000258311	0.134187
ENSG00000154608	-0.497736
ENSG00000173918	0.121769
ENSG00000070182	0.381155
ENSG00000225302	-0.224215
ENSG00000234373	0.109335
ENSG00000258479	0.0494308
ENSG00000279516	-0.343845
ENSG00000113211	-0.0235501
ENSG00000205090	0.0471732
ENSG00000113494	-0.00276968
ENSG00000258017	-0.261145
ENSG00000196741	0.310777
ENSG00000274292	0.356069
ENSG00000229344	0.315505
ENSG00000279456	-0.033379
ENSG00000226887	0.0805464
ENSG00000233984	-0.710661
ENSG00000149295	0.4481
ENSG00000234882	-0.358738
ENSG00000272758	0.017882
ENSG00000164743	-0.291906
ENSG00000250133	-0.346797
ENSG00000273970	0.548718
ENSG00000144406	-0.41085
ENSG00000120049	0.153951
ENSG00000204128	0.227639
ENSG00000248690	-0.129795
ENSG00000185633	-0.147525
ENSG00000102886	-0.12778
ENSG00000148488	0.665519
ENSG00000224950	0.150722
ENSG00000205663	0.343214
ENSG00000273186	-0.00546856
ENSG00000227456	0.114739
ENSG00000185437	-0.16963
ENSG00000261628	-0.254548
ENSG00000253669	-0.0131019
ENSG00000268460	-0.0939239
ENSG00000134463	0.108624
ENSG00000271020	-0.118377
ENSG00000233846	0.231793
ENSG00000250159	0.0233132
ENSG00000182632	0.299752
ENSG00000236871	0.230647
ENSG00000249863	-0.191892
ENSG00000266680	0.330265
ENSG00000280046	-0.309258
ENSG00000213057	-0.169628
ENSG00000198732	-0.304519
ENSG00000271895	0.100728
ENSG00000234390	-0.00180746
ENSG00000279369	-0.131198
[truncated: 13,801 more rows]
