# Supplementary material for: Ubiquitin ligase STUB1 destabilizes IFNγ-receptor complex to suppress tumor IFNγ signaling
Source: Nat Commun. 2022 Apr 8;13:1923. doi: 10.1038/s41467-022-29442-x (PMC8993893; doi:10.1038/s41467-022-29442-x)
Supplement: Supplementary file 8 — Supplementary Data 4 [file 41467_2022_29442_MOESM8_ESM.xlsx]

## Sheet: Supplementary Data_4_GSEA_sgCtr
NAME	SIZE	NES	NOM p-val	FDR q-val	FWER p-val	RANK AT MAX
KEGG_INTESTINAL_IMMUNE_NETWORK_FOR_IGA_PRODUCTION	32	2.28418	0	0	0	1502
KEGG_AUTOIMMUNE_THYROID_DISEASE	26	2.27121	0	0	0	1731
REACTOME_INTERFERON_ALPHA_BETA_SIGNALING	57	2.25524	0	0	0	1969
WP_SARSCOV2_INNATE_IMMUNITY_EVASION_AND_CELLSPECIFIC_IMMUNE_RESPONSE	57	2.2347	0	0	0	1969
KEGG_GRAFT_VERSUS_HOST_DISEASE	29	2.21388	0	0.000628	0.003	1731
KEGG_ALLOGRAFT_REJECTION	28	2.18741	0	0.000879	0.005	1731
REACTOME_INTERFERON_SIGNALING	170	2.17969	0	0.00106651	0.007	2109
REACTOME_INTERFERON_GAMMA_SIGNALING	75	2.14872	0	0.00146124	0.011	1366
REACTOME_CHEMOKINE_RECEPTORS_BIND_CHEMOKINES	29	2.14696	0	0.00142438	0.012	1531
WP_ALLOGRAFT_REJECTION	64	2.14176	0	0.00149037	0.014	1559
KEGG_ANTIGEN_PROCESSING_AND_PRESENTATION	54	2.09999	0	0.00288975	0.03	2007
KEGG_TYPE_I_DIABETES_MELLITUS	34	2.09983	0	0.00264893	0.03	1731
KEGG_COMPLEMENT_AND_COAGULATION_CASCADES	32	2.06208	0	0.0043216	0.051	1604
KEGG_VIRAL_MYOCARDITIS	53	1.99463	0	0.0107904	0.132	1796
WP_THE_HUMAN_IMMUNE_RESPONSE_TO_TUBERCULOSIS	23	1.97078	0	0.0151041	0.192	3021
PID_IL23_PATHWAY	27	1.96455	0	0.0155619	0.208	1559
WP_TYPE_II_INTERFERON_SIGNALING_IFNG	31	1.92472	0	0.025292	0.336	2109
WP_PATHOGENESIS_OF_SARSCOV2_MEDIATED_BY_NSP9NSP10_COMPLEX	16	1.88079	0.00215983	0.0426375	0.533	1393
WP_PEPTIDE_GPCRS	17	1.85925	0	0.0521839	0.621	1242
KEGG_CELL_ADHESION_MOLECULES_CAMS	94	1.85422	0	0.0525505	0.638	1763
REACTOME_INTERLEUKIN_10_SIGNALING	34	1.85387	0.00447427	0.0502489	0.639	1559
BIOCARTA_CTLA4_PATHWAY	19	1.85299	0.00198413	0.0485961	0.643	1651
KEGG_ASTHMA	16	1.83626	0.00209205	0.0556601	0.699	834
KEGG_LEISHMANIA_INFECTION	59	1.83551	0	0.0540114	0.703	1559
WP_TOLLLIKE_RECEPTOR_SIGNALING_PATHWAY	76	1.82801	0	0.0560296	0.728	1969
REACTOME_PEPTIDE_LIGAND_BINDING_RECEPTORS	59	1.82657	0.00417537	0.054904	0.733	1531
WP_CYTOSOLIC_DNASENSING_PATHWAY	54	1.82294	0.00225734	0.05504	0.744	3177
REACTOME_PD_1_SIGNALING	19	1.81377	0.0021978	0.0591112	0.786	527
WP_HOSTPATHOGEN_INTERACTION_OF_HUMAN_CORONA_VIRUSES_INTERFERON_INDUCTION	32	1.80759	0	0.0611979	0.81	3713
REACTOME_GENERATION_OF_SECOND_MESSENGER_MOLECULES	30	1.80373	0.00222222	0.0615995	0.822	1651
WP_NONGENOMIC_ACTIONS_OF_125_DIHYDROXYVITAMIN_D3	60	1.79929	0.00215054	0.0626602	0.844	1295
KEGG_TOLL_LIKE_RECEPTOR_SIGNALING_PATHWAY	75	1.78977	0	0.0686074	0.872	1969
REACTOME_COMPLEMENT_CASCADE	20	1.78162	0.00414079	0.0727765	0.893	1604
KEGG_CYTOSOLIC_DNA_SENSING_PATHWAY	36	1.74272	0	0.106071	0.968	2583
WP_COMPLEMENT_AND_COAGULATION_CASCADES	31	1.74063	0.00445434	0.105516	0.969	1604
WP_NUCLEOTIDEBINDING_OLIGOMERIZATION_DOMAIN_NOD_PATHWAY	31	1.73839	0.0114679	0.104846	0.975	1559
WP_OVERVIEW_OF_NANOPARTICLE_EFFECTS	15	1.72962	0.00638298	0.112389	0.984	1216
REACTOME_TCR_SIGNALING	112	1.72109	0	0.118667	0.989	2419
WP_TYPE_I_INTERFERON_INDUCTION_AND_SIGNALING_DURING_SARSCOV2_INFECTION	27	1.71158	0.00819672	0.127384	0.995	3713
WP_NOVEL_INTRACELLULAR_COMPONENTS_OF_RIGILIKE_RECEPTOR_RLR_PATHWAY	55	1.70148	0.00219298	0.136959	0.996	4105
WP_REGULATION_OF_TOLLLIKE_RECEPTOR_SIGNALING_PATHWAY	105	1.69816	0	0.137437	0.996	1969
WP_PATHWAYS_OF_NUCLEIC_ACID_METABOLISM_AND_INNATE_IMMUNE_SENSING	15	1.68673	0.0198676	0.149351	0.996	3061
BIOCARTA_DEATH_PATHWAY	29	1.67778	0.00220751	0.158587	0.997	2332
BIOCARTA_TH1TH2_PATHWAY	15	1.6587	0.0105042	0.184724	0.999	1236
REACTOME_ANTIVIRAL_MECHANISM_BY_IFN_STIMULATED_GENES	81	1.65146	0.00225225	0.1919	0.999	4420
PID_IL27_PATHWAY	22	1.63784	0.0205479	0.210929	1	2504
WP_INTERACTIONS_BETWEEN_IMMUNE_CELLS_AND_MICRORNAS_IN_TUMOR_MICROENVIRONMENT	24	1.62984	0.0235546	0.220497	1	272
WP_SARS_CORONAVIRUS_AND_INNATE_IMMUNITY	16	1.62332	0.0246637	0.228249	1	3713
WP_TNF_RELATED_WEAK_INDUCER_OF_APOPTOSIS_TWEAK_SIGNALING_PATHWAY	41	1.61885	0.0159817	0.23227	1	1592
REACTOME_BBSOME_MEDIATED_CARGO_TARGETING_TO_CILIUM	21	1.61797	0.0154867	0.229378	1	4301
KEGG_RIG_I_LIKE_RECEPTOR_SIGNALING_PATHWAY	52	1.61543	0.00686499	0.230133	1	4105
REACTOME_CLASS_A_1_RHODOPSIN_LIKE_RECEPTORS	105	1.61257	0.00234742	0.231201	1	1793
REACTOME_COSTIMULATION_BY_THE_CD28_FAMILY	63	1.60759	0.00875273	0.236886	1	544
REACTOME_ADHERENS_JUNCTIONS_INTERACTIONS	23	1.60498	0.0269058	0.237731	1	331
WP_GENES_RELATED_TO_PRIMARY_CILIUM_DEVELOPMENT_BASED_ON_CRISPR	102	1.60162	0.0022779	0.240191	1	3154
KEGG_APOPTOSIS	78	1.59752	0.00479616	0.243682	1	2679
BIOCARTA_CSK_PATHWAY	18	1.58308	0.0272537	0.26999	1	1393
BIOCARTA_CCR5_PATHWAY	17	1.58122	0.039749	0.269359	1	1242
KEGG_NOD_LIKE_RECEPTOR_SIGNALING_PATHWAY	50	1.57323	0.020979	0.281733	1	1559
NABA_SECRETED_FACTORS	149	1.5657	0	0.293667	1	1564
KEGG_CYTOKINE_CYTOKINE_RECEPTOR_INTERACTION	150	1.56356	0	0.293237	1	2183
REACTOME_TP53_REGULATES_TRANSCRIPTION_OF_CELL_DEATH_GENES	39	1.56056	0.0115207	0.295603	1	1704
KEGG_GLYCOSAMINOGLYCAN_BIOSYNTHESIS_HEPARAN_SULFATE	21	1.55579	0.02	0.301785	1	1919
BIOCARTA_41BB_PATHWAY	17	1.54976	0.0311203	0.311117	1	4372
REACTOME_ANTIGEN_PRESENTATION_FOLDING_ASSEMBLY_AND_PEPTIDE_LOADING_OF_CLASS_I_MHC	24	1.52221	0.0358566	0.376338	1	4365
REACTOME_HEDGEHOG_LIGAND_BIOGENESIS	58	1.52201	0.0220049	0.371298	1	3527
WP_GLUCOCORTICOID_RECEPTOR_PATHWAY	55	1.5178	0.0176991	0.377768	1	2617
REACTOME_ER_QUALITY_CONTROL_COMPARTMENT_ERQC	21	1.51403	0.0357895	0.382365	1	3656
WP_PI3KAKTMTOR_VITD3_SIGNALLING	19	1.51386	0.0481172	0.377362	1	248
BIOCARTA_IL6_PATHWAY	21	1.51257	0.0521739	0.375345	1	2504
REACTOME_HS_GAG_BIOSYNTHESIS	24	1.5034	0.0469799	0.395151	1	1919
KEGG_CHEMOKINE_SIGNALING_PATHWAY	134	1.49918	0.00228833	0.401191	1	1651
BIOCARTA_IL7_PATHWAY	16	1.47831	0.0677618	0.458911	1	2504
WP_FIBRIN_COMPLEMENT_RECEPTOR_3_SIGNALING_PATHWAY	30	1.47631	0.0482456	0.458789	1	1056
WP_OXIDATIVE_DAMAGE	34	1.46967	0.0595483	0.473496	1	2765
WP_RESISTIN_AS_A_REGULATOR_OF_INFLAMMATION	31	1.46746	0.0456522	0.473655	1	2400
BIOCARTA_INFLAM_PATHWAY	21	1.46641	0.0548523	0.470692	1	1364
KEGG_SYSTEMIC_LUPUS_ERYTHEMATOSUS	64	1.46559	0.0196507	0.466969	1	937
BIOCARTA_CASPASE_PATHWAY	22	1.46349	0.0566449	0.467482	1	2439
PID_TRAIL_PATHWAY	26	1.45941	0.0559441	0.474414	1	2400
REACTOME_ATF4_ACTIVATES_GENES_IN_RESPONSE_TO_ENDOPLASMIC_RETICULUM_STRESS	27	1.45448	0.0639659	0.484231	1	1950
WP_EXERCISEINDUCED_CIRCADIAN_REGULATION	46	1.44733	0.039261	0.501534	1	3587
WP_CYTOKINES_AND_INFLAMMATORY_RESPONSE	20	1.44548	0.0662252	0.501625	1	1559
WP_CHEMOKINE_SIGNALING_PATHWAY	124	1.4444	0.0140845	0.498928	1	1651
KEGG_OLFACTORY_TRANSDUCTION	20	1.44418	0.0625	0.49381	1	51
REACTOME_GPCR_LIGAND_BINDING	150	1.44098	0.0125313	0.497804	1	1563
KEGG_GLYCOSPHINGOLIPID_BIOSYNTHESIS_GANGLIO_SERIES	15	1.43599	0.0785563	0.508482	1	880
WP_VITAMIN_B12_METABOLISM	33	1.43558	0.0588235	0.504092	1	1610
BIOCARTA_HER2_PATHWAY	22	1.43308	0.0959821	0.506922	1	2400
WP_VIRAL_ACUTE_MYOCARDITIS	74	1.43247	0.0469799	0.50325	1	1796
WP_OVERVIEW_OF_INTERFERONSMEDIATED_SIGNALING_PATHWAY	16	1.42774	0.0795699	0.513348	1	2711
REACTOME_EFFECTS_OF_PIP2_HYDROLYSIS	22	1.42445	0.0609756	0.518615	1	1971
WP_HUMAN_COMPLEMENT_SYSTEM	48	1.42075	0.026087	0.525373	1	1604
SA_CASPASE_CASCADE	19	1.42028	0.0827887	0.521336	1	2439
REACTOME_PYROPTOSIS	22	1.41845	0.0665189	0.521696	1	4754
WP_PHOTODYNAMIC_THERAPYINDUCED_NFKB_SURVIVAL_SIGNALING	31	1.41239	0.0703297	0.535839	1	2561
WP_SELENIUM_MICRONUTRIENT_NETWORK	58	1.4101	0.0389908	0.537845	1	2126
REACTOME_PI_METABOLISM	73	1.40788	0.05	0.539348	1	3281
PID_HIV_NEF_PATHWAY	35	1.40765	0.0602911	0.534844	1	2602
KEGG_PRION_DISEASES	26	1.40737	0.0639175	0.530303	1	347
PID_SHP2_PATHWAY	50	1.39759	0.0593824	0.558395	1	3470
REACTOME_PERK_REGULATES_GENE_EXPRESSION	32	1.39693	0.0699774	0.555164	1	2087
PID_EPHA_FWDPATHWAY	25	1.39618	0.0770791	0.552427	1	1393
REACTOME_G_ALPHA_I_SIGNALLING_EVENTS	145	1.39219	0.0120773	0.56068	1	1563
REACTOME_INTERLEUKIN_12_FAMILY_SIGNALING	51	1.38952	0.0785714	0.564101	1	2565
PID_IL6_7_PATHWAY	43	1.38824	0.0532151	0.563262	1	2504
WP_APOPTOSIS_MODULATION_AND_SIGNALING	85	1.38565	0.0362812	0.566709	1	2602
REACTOME_GENE_AND_PROTEIN_EXPRESSION_BY_JAK_STAT_SIGNALING_AFTER_INTERLEUKIN_12_STIMULATION	35	1.38552	0.0629213	0.561885	1	2130
WP_INFLAMMATORY_RESPONSE_PATHWAY	22	1.38431	0.0804348	0.560414	1	1393
PID_NFAT_TFPATHWAY	42	1.38416	0.0650224	0.555706	1	2175
REACTOME_INTERLEUKIN_12_SIGNALING	43	1.38362	0.0653595	0.552705	1	2565
BIOCARTA_TNFR2_PATHWAY	17	1.38212	0.0915332	0.552717	1	4623
WP_IL1_AND_MEGAKARYOCYTES_IN_OBESITY	15	1.3662	0.12035	0.60168	1	1559
REACTOME_ANTIGEN_PROCESSING_CROSS_PRESENTATION	88	1.35697	0.0366133	0.63089	1	2419
BIOCARTA_MITOCHONDRIA_PATHWAY	19	1.35682	0.134328	0.6259	1	2332
REACTOME_NEGATIVE_REGULATORS_OF_DDX58_IFIH1_SIGNALING	34	1.35601	0.0783848	0.623253	1	3882
REACTOME_NOD1_2_SIGNALING_PATHWAY	35	1.34711	0.101322	0.650863	1	3177
WP_NOCGMPPKG_MEDIATED_NEUROPROTECTION	28	1.34531	0.109731	0.652269	1	3086
REACTOME_DECTIN_1_MEDIATED_NONCANONICAL_NF_KB_SIGNALING	59	1.34381	0.0571429	0.652402	1	5466
KEGG_PROTEASOME	42	1.34377	0.0853933	0.647171	1	5118
REACTOME_REGULATION_OF_INSULIN_LIKE_GROWTH_FACTOR_IGF_TRANSPORT_AND_UPTAKE_BY_INSULIN_LIKE_GROWTH_FACTOR_BINDING_PROTEINS_IGFBPS	83	1.33883	0.0523918	0.660214	1	1009
BIOCARTA_TID_PATHWAY	18	1.33276	0.126582	0.677646	1	2543
WP_EBOLA_VIRUS_PATHWAY_ON_HOST	113	1.33045	0.037296	0.681133	1	1731
WP_MIRNAS_INVOLVEMENT_IN_THE_IMMUNE_RESPONSE_IN_SEPSIS	33	1.33037	0.116379	0.67601	1	1592
REACTOME_RAF_INDEPENDENT_MAPK1_3_ACTIVATION	23	1.32814	0.141304	0.678601	1	1131
WP_APOPTOSIS	80	1.3277	0.0746606	0.674865	1	3343
REACTOME_STABILIZATION_OF_P53	55	1.32683	0.0798319	0.672856	1	5118
REACTOME_CELL_CELL_JUNCTION_ORGANIZATION	36	1.3242	0.114155	0.677141	1	1581
WP_EBV_LMP1_SIGNALING	22	1.32402	0.130531	0.672517	1	1592
REACTOME_DEFECTIVE_CFTR_CAUSES_CYSTIC_FIBROSIS	58	1.32152	0.0896552	0.676717	1	5466
WP_TCELL_ANTIGEN_RECEPTOR_TCR_PATHWAY_DURING_STAPHYLOCOCCUS_AUREUS_INFECTION	59	1.3196	0.0737327	0.678686	1	1651
REACTOME_CALNEXIN_CALRETICULIN_CYCLE	26	1.31904	0.123913	0.675669	1	3656
REACTOME_INTERACTION_BETWEEN_L1_AND_ANKYRINS	22	1.31893	0.117904	0.670998	1	842
WP_GPCRS_CLASS_A_RHODOPSINLIKE	62	1.31848	0.0757238	0.66772	1	1793
WP_MIRNA_TARGETS_IN_ECM_AND_MEMBRANE_RECEPTORS	17	1.31309	0.159091	0.682438	1	1510
REACTOME_BRANCHED_CHAIN_AMINO_ACID_CATABOLISM	20	1.31064	0.136555	0.686628	1	4998
WP_CANNABINOID_RECEPTOR_SIGNALING	22	1.30945	0.138075	0.685916	1	1514
PID_TOLL_ENDOGENOUS_PATHWAY	18	1.30925	0.141649	0.68166	1	1600
PID_SYNDECAN_4_PATHWAY	27	1.30868	0.122917	0.678863	1	2650
PID_INTEGRIN_A9B1_PATHWAY	17	1.30625	0.166667	0.682849	1	1954
WP_SARSCOV2_MITOCHONDRIAL_INTERACTIONS	25	1.30318	0.147992	0.68953	1	1932
BIOCARTA_ERAD_PATHWAY	19	1.30068	0.154321	0.693819	1	2682
REACTOME_FORMATION_OF_FIBRIN_CLOT_CLOTTING_CASCADE	16	1.29933	0.137339	0.694399	1	4140
REACTOME_RND1_GTPASE_CYCLE	38	1.29848	0.122642	0.69248	1	2758
KEGG_T_CELL_RECEPTOR_SIGNALING_PATHWAY	99	1.29254	0.0510949	0.709906	1	1651
WP_NEOVASCULARISATION_PROCESSES	33	1.29162	0.115974	0.708753	1	1592
REACTOME_TRAF6_MEDIATED_IRF7_ACTIVATION	15	1.29127	0.164811	0.705264	1	4105
REACTOME_CONSTITUTIVE_SIGNALING_BY_ABERRANT_PI3K_IN_CANCER	50	1.29092	0.113164	0.701834	1	437
BIOCARTA_ATRBRCA_PATHWAY	22	1.29002	0.152505	0.700301	1	4543
WP_TOLLLIKE_RECEPTOR_SIGNALING_RELATED_TO_MYD88	25	1.28949	0.153684	0.697759	1	1932
KEGG_LEUKOCYTE_TRANSENDOTHELIAL_MIGRATION	83	1.28373	0.0911215	0.714296	1	1651
WP_CELL_MIGRATION_AND_INVASION_THROUGH_P75NTR	28	1.28131	0.157025	0.718801	1	914
REACTOME_MET_ACTIVATES_PTK2_SIGNALING	26	1.27953	0.134703	0.720816	1	1638
BIOCARTA_AKT_PATHWAY	21	1.27811	0.172949	0.721365	1	2400
WP_UNFOLDED_PROTEIN_RESPONSE	24	1.27714	0.165591	0.720625	1	4679
REACTOME_TRANSCRIPTIONAL_REGULATION_BY_VENTX	37	1.26877	0.13617	0.748874	1	2874
WP_PHOTODYNAMIC_THERAPYINDUCED_AP1_SURVIVAL_SIGNALING	48	1.26674	0.117096	0.75198	1	2489
WP_FOLATE_METABOLISM	42	1.26353	0.150115	0.75987	1	1610
REACTOME_DDX58_IFIH1_MEDIATED_INDUCTION_OF_INTERFERON_ALPHA_BETA	65	1.26327	0.122066	0.756121	1	4743
WP_PROTEASOME_DEGRADATION	60	1.25974	0.131944	0.765821	1	4762
KEGG_VASCULAR_SMOOTH_MUSCLE_CONTRACTION	75	1.25676	0.110345	0.772997	1	1301
REACTOME_CELL_JUNCTION_ORGANIZATION	61	1.25633	0.131579	0.770079	1	1638
WP_THYMIC_STROMAL_LYMPHOPOIETIN_TSLP_SIGNALING_PATHWAY	43	1.25579	0.138952	0.767413	1	1592
REACTOME_MHC_CLASS_II_ANTIGEN_PRESENTATION	108	1.25107	0.0885781	0.781256	1	2545
REACTOME_INTERLEUKIN_20_FAMILY_SIGNALING	17	1.24976	0.189024	0.781602	1	3381
REACTOME_TICAM1_RIP1_MEDIATED_IKK_COMPLEX_RECRUITMENT	18	1.248	0.178112	0.78357	1	3527
WP_METAPATHWAY_BIOTRANSFORMATION_PHASE_I_AND_II	77	1.24739	0.124211	0.781119	1	1973
PID_IL12_2PATHWAY	56	1.24611	0.1247	0.781468	1	2096
REACTOME_CTLA4_INHIBITORY_SIGNALING	20	1.24277	0.206208	0.790495	1	1393
WP_VITAMIN_D_IN_INFLAMMATORY_DISEASES	22	1.24164	0.194508	0.790692	1	3444
REACTOME_APC_C_MEDIATED_DEGRADATION_OF_CELL_CYCLE_PROTEINS	86	1.24161	0.112128	0.786199	1	5135
REACTOME_INTERLEUKIN_6_FAMILY_SIGNALING	22	1.24151	0.193684	0.782079	1	1003
WP_TYROBP_CAUSAL_NETWORK	49	1.23895	0.14597	0.787645	1	1653
KEGG_JAK_STAT_SIGNALING_PATHWAY	104	1.23847	0.115663	0.785027	1	2712
SIG_CHEMOTAXIS	40	1.23673	0.170886	0.787225	1	1301
REACTOME_SYNTHESIS_OF_PIPS_AT_THE_EARLY_ENDOSOME_MEMBRANE	16	1.23491	0.213043	0.790184	1	4823
REACTOME_REGULATION_OF_TNFR1_SIGNALING	35	1.2345	0.189655	0.787424	1	3527
PID_AP1_PATHWAY	58	1.23416	0.141876	0.78428	1	2214
PID_FRA_PATHWAY	30	1.23285	0.176856	0.785078	1	225
PID_IFNG_PATHWAY	38	1.23126	0.165236	0.786674	1	3021
REACTOME_MET_PROMOTES_CELL_MOTILITY	36	1.22918	0.17735	0.790368	1	1082
REACTOME_DOWNSTREAM_SIGNALING_EVENTS_OF_B_CELL_RECEPTOR_BCR	79	1.2281	0.135321	0.790182	1	5624
KEGG_N_GLYCAN_BIOSYNTHESIS	46	1.22675	0.168142	0.791181	1	2569
KEGG_ECM_RECEPTOR_INTERACTION	62	1.22504	0.13969	0.793498	1	1638
WP_STING_PATHWAY_IN_KAWASAKILIKE_DISEASE_AND_COVID19	21	1.22381	0.187773	0.794098	1	3134
REACTOME_SIGNALING_BY_GPCR	334	1.21846	0.047486	0.810937	1	2097
PID_CASPASE_PATHWAY	50	1.21825	0.162471	0.807386	1	2602
PID_CXCR3_PATHWAY	39	1.21373	0.161504	0.821336	1	1615
REACTOME_NS1_MEDIATED_EFFECTS_ON_HOST_PATHWAYS	41	1.21288	0.180049	0.820446	1	4268
REACTOME_CELL_CELL_COMMUNICATION	89	1.21251	0.122271	0.817505	1	1638
REACTOME_SIGNALING_BY_ERYTHROPOIETIN	24	1.20666	0.203196	0.836728	1	1003
REACTOME_SYNTHESIS_OF_PIPS_AT_THE_PLASMA_MEMBRANE	48	1.20657	0.17161	0.832713	1	3967
REACTOME_TERMINATION_OF_TRANSLESION_DNA_SYNTHESIS	32	1.2064	0.182796	0.829092	1	3544
REACTOME_FCERI_MEDIATED_NF_KB_ACTIVATION	74	1.20615	0.158986	0.825918	1	5466
REACTOME_N_GLYCAN_TRIMMING_IN_THE_ER_AND_CALNEXIN_CALRETICULIN_CYCLE	35	1.20065	0.204545	0.843902	1	4217
REACTOME_INTEGRIN_CELL_SURFACE_INTERACTIONS	60	1.20001	0.175325	0.842189	1	2139
WP_GENES_CONTROLLING_NEPHROGENESIS	31	1.19967	0.186517	0.839263	1	1242
REACTOME_CROSS_PRESENTATION_OF_SOLUBLE_EXOGENOUS_ANTIGENS_ENDOSOMES	44	1.19688	0.182952	0.846333	1	5118
KEGG_FOCAL_ADHESION	166	1.19457	0.114144	0.851138	1	1638
REACTOME_SIGNALING_BY_KIT_IN_DISEASE	18	1.19349	0.223656	0.851012	1	3381
PID_INTEGRIN1_PATHWAY	51	1.19153	0.20524	0.854734	1	2139
KEGG_REGULATION_OF_AUTOPHAGY	20	1.18956	0.227373	0.858715	1	4021
WP_IL4_SIGNALING_PATHWAY	52	1.1876	0.182819	0.86244	1	1516
REACTOME_PHASE_II_CONJUGATION_OF_COMPOUNDS	55	1.18664	0.184091	0.862035	1	2738
REACTOME_ASSEMBLY_OF_COLLAGEN_FIBRILS_AND_OTHER_MULTIMERIC_STRUCTURES	45	1.18426	0.205607	0.867731	1	2139
REACTOME_G_ALPHA_Q_SIGNALLING_EVENTS	106	1.18269	0.151869	0.870055	1	2219
WP_TNF_ALPHA_SIGNALING_PATHWAY	86	1.18143	0.145199	0.870951	1	3262
WP_HEMATOPOIETIC_STEM_CELL_DIFFERENTIATION	39	1.1813	0.202198	0.867233	1	1954
REACTOME_FOXO_MEDIATED_TRANSCRIPTION_OF_OXIDATIVE_STRESS_METABOLIC_AND_NEURONAL_GENES	19	1.17854	0.254202	0.874391	1	2346
REACTOME_ANTI_INFLAMMATORY_RESPONSE_FAVOURING_LEISHMANIA_PARASITE_INFECTION	72	1.17636	0.164384	0.879127	1	1563
WP_CARDIAC_PROGENITOR_DIFFERENTIATION	25	1.17632	0.25	0.875116	1	1242
KEGG_GLYCINE_SERINE_AND_THREONINE_METABOLISM	19	1.17565	0.228033	0.873704	1	2515
REACTOME_VOLTAGE_GATED_POTASSIUM_CHANNELS	18	1.17508	0.232704	0.871915	1	70
WP_SPINAL_CORD_INJURY	90	1.17009	0.194245	0.888512	1	1692
WP_OVARIAN_INFERTILITY_GENES	19	1.16702	0.260504	0.897007	1	3106
REACTOME_REGULATION_OF_RAS_BY_GAPS	65	1.1665	0.2	0.89488	1	3527
WP_HIPPOMERLIN_SIGNALING_DYSREGULATION	91	1.16642	0.177156	0.89108	1	1590
WP_BDNFTRKB_SIGNALING	32	1.16481	0.254386	0.893664	1	430
WP_SPLICING_FACTOR_NOVA_REGULATED_SYNAPTIC_PROTEINS	36	1.16248	0.239035	0.899268	1	299
PID_CXCR4_PATHWAY	90	1.16204	0.180995	0.896911	1	1615
KEGG_PROTEIN_EXPORT	23	1.16177	0.286976	0.894002	1	4909
PID_FAS_PATHWAY	34	1.15987	0.265659	0.897642	1	2545
REACTOME_ACYL_CHAIN_REMODELLING_OF_PC	16	1.15871	0.271605	0.89866	1	858
REACTOME_MITOTIC_SPINDLE_CHECKPOINT	110	1.15842	0.170213	0.895843	1	4582
WP_TLR4_SIGNALING_AND_TOLERANCE	26	1.15811	0.258547	0.893169	1	1932
WP_PHOSPHOINOSITIDES_METABOLISM	45	1.15745	0.236726	0.891828	1	4021
NABA_CORE_MATRISOME	145	1.15588	0.185882	0.894301	1	1980
PID_INTEGRIN3_PATHWAY	32	1.15544	0.264317	0.892044	1	1949
BIOCARTA_HIVNEF_PATHWAY	56	1.15481	0.214286	0.890724	1	3251
WP_PHOTODYNAMIC_THERAPYINDUCED_UNFOLDED_PROTEIN_RESPONSE	25	1.15474	0.272349	0.887129	1	4093
WP_TCELL_RECEPTOR_AND_COSTIMULATORY_SIGNALING	29	1.15366	0.257081	0.887747	1	2669
WP_PI3KAKT_SIGNALING_PATHWAY	239	1.1528	0.147059	0.887369	1	1969
WP_GPCRS_OTHER	35	1.14762	0.254945	0.904412	1	1437
WP_TRANSCRIPTION_FACTOR_REGULATION_IN_ADIPOGENESIS	19	1.14669	0.289308	0.904684	1	2267
WP_IL18_SIGNALING_PATHWAY	226	1.14665	0.135065	0.900979	1	1981
WP_INTERACTOME_OF_POLYCOMB_REPRESSIVE_COMPLEX_2_PRC2	16	1.14633	0.278618	0.898386	1	5067
WP_OVERVIEW_OF_LEUKOCYTEINTRINSIC_HIPPO_PATHWAY_FUNCTIONS	33	1.14443	0.252066	0.902531	1	3250
REACTOME_NUCLEOTIDE_BINDING_DOMAIN_LEUCINE_RICH_REPEAT_CONTAINING_RECEPTOR_NLR_SIGNALING_PATHWAYS	53	1.13753	0.230942	0.926927	1	3737
REACTOME_GLYCOSAMINOGLYCAN_METABOLISM	94	1.13719	0.216019	0.924475	1	2290
WP_REGULATION_OF_SISTER_CHROMATID_SEPARATION_AT_THE_METAPHASEANAPHASE_TRANSITION	15	1.13512	0.280353	0.928935	1	3692
REACTOME_SEMA3A_PAK_DEPENDENT_AXON_REPULSION	15	1.13142	0.307368	0.940143	1	544
PID_IL4_2PATHWAY	43	1.13054	0.249443	0.940059	1	1519
PID_ECADHERIN_STABILIZATION_PATHWAY	37	1.12915	0.268293	0.941908	1	693
REACTOME_OVARIAN_TUMOR_DOMAIN_PROTEASES	36	1.12901	0.281395	0.938625	1	3899
REACTOME_METABOLISM_OF_POLYAMINES	56	1.12645	0.252874	0.945273	1	5184
WP_SENESCENCE_AND_AUTOPHAGY_IN_CANCER	96	1.12381	0.236239	0.952672	1	3991
REACTOME_DISEASES_OF_IMMUNE_SYSTEM	20	1.12018	0.322034	0.964012	1	1600
REACTOME_BIOLOGICAL_OXIDATIONS	106	1.11962	0.210773	0.962653	1	2738
REACTOME_G1_S_DNA_DAMAGE_CHECKPOINTS	66	1.11941	0.253521	0.959779	1	3527
PID_ARF6_TRAFFICKING_PATHWAY	41	1.11875	0.292111	0.958723	1	4428
REACTOME_SIGNALING_BY_THE_B_CELL_RECEPTOR_BCR	102	1.11702	0.228235	0.962013	1	3527
BIOCARTA_PAR1_PATHWAY	17	1.11699	0.303571	0.958305	1	2400
WP_GENES_INVOLVED_IN_MALE_INFERTILITY	90	1.11626	0.240363	0.957516	1	2764
PID_ANGIOPOIETIN_RECEPTOR_PATHWAY	40	1.1159	0.289417	0.955141	1	2650
REACTOME_FCGR3A_MEDIATED_IL10_SYNTHESIS	29	1.11534	0.305804	0.953654	1	1401
REACTOME_STING_MEDIATED_INDUCTION_OF_HOST_IMMUNE_RESPONSES	15	1.11528	0.329787	0.950249	1	5229
BIOCARTA_AGR_PATHWAY	28	1.11519	0.319018	0.946977	1	1126
REACTOME_NEGATIVE_REGULATION_OF_THE_PI3K_AKT_NETWORK	82	1.11435	0.281623	0.946934	1	437
PID_HNF3A_PATHWAY	26	1.11225	0.308026	0.951846	1	2765
REACTOME_TRISTETRAPROLIN_TTP_ZFP36_BINDS_AND_DESTABILIZES_MRNA	17	1.11153	0.316129	0.950914	1	3464
REACTOME_CLEC7A_DECTIN_1_SIGNALING	96	1.10995	0.252252	0.953815	1	3527
WP_TCELL_ANTIGEN_RECEPTOR_TCR_SIGNALING_PATHWAY	85	1.10771	0.262791	0.959542	1	1651
WP_FOCAL_ADHESION	163	1.10713	0.206651	0.958462	1	1638
KEGG_TYPE_II_DIABETES_MELLITUS	29	1.10668	0.307692	0.956677	1	1023
REACTOME_SCF_SKP2_MEDIATED_DEGRADATION_OF_P27_P21	59	1.10515	0.289238	0.959592	1	5118
WP_SIGNAL_TRANSDUCTION_THROUGH_IL1R	29	1.10457	0.323913	0.958339	1	2376
WP_IL6_SIGNALING_PATHWAY	39	1.10206	0.276888	0.96511	1	2504
WP_DEVELOPMENT_AND_HETEROGENEITY_OF_THE_ILC_FAMILY	21	1.10189	0.312236	0.962153	1	1559
PID_CD40_PATHWAY	26	1.10151	0.320879	0.960165	1	4372
WP_INTRAFLAGELLAR_TRANSPORT_PROTEINS_BINDING_TO_DYNEIN	26	1.0953	0.313853	0.982308	1	3435
BIOCARTA_NTHI_PATHWAY	23	1.09422	0.332579	0.983197	1	3444
REACTOME_SIGNALING_BY_PDGF	47	1.09358	0.305239	0.982242	1	1173
WP_LUNG_FIBROSIS	44	1.09252	0.32	0.983018	1	2027
REACTOME_MITOTIC_METAPHASE_AND_ANAPHASE	223	1.09241	0.221951	0.979953	1	5004
WP_PHOTODYNAMIC_THERAPYINDUCED_HIF1_SURVIVAL_SIGNALING	34	1.09215	0.334764	0.977487	1	1305
KEGG_SMALL_CELL_LUNG_CANCER	80	1.09145	0.285714	0.976768	1	1638
REACTOME_ACYL_CHAIN_REMODELLING_OF_PE	16	1.09087	0.336152	0.975705	1	858
REACTOME_HEPARAN_SULFATE_HEPARIN_HS_GAG_METABOLISM	43	1.09078	0.282609	0.972607	1	2036
REACTOME_INACTIVATION_OF_CSF3_G_CSF_SIGNALING	22	1.08955	0.340381	0.974052	1	3527
REACTOME_TRANSLESION_SYNTHESIS_BY_Y_FAMILY_DNA_POLYMERASES_BYPASSES_LESIONS_ON_DNA_TEMPLATE	39	1.0876	0.330233	0.978394	1	3544
WP_RENIN_ANGIOTENSIN_ALDOSTERONE_SYSTEM_RAAS	26	1.08336	0.338785	0.992142	1	2068
REACTOME_ECM_PROTEOGLYCANS	48	1.08257	0.34023	0.991724	1	1949
WP_1Q211_COPY_NUMBER_VARIATION_SYNDROME	24	1.08207	0.346809	0.990392	1	3905
WP_MYOMETRIAL_RELAXATION_AND_CONTRACTION_PATHWAYS	118	1.08123	0.306346	0.990583	1	1563
NABA_ECM_GLYCOPROTEINS	105	1.08032	0.288462	0.99082	1	1173
WP_EPO_RECEPTOR_SIGNALING	25	1.07995	0.331002	0.988827	1	1003
REACTOME_FLT3_SIGNALING_IN_DISEASE	27	1.07918	0.365145	0.988575	1	3527
REACTOME_PI3K_AKT_SIGNALING_IN_CANCER	76	1.07914	0.324645	0.985294	1	437
WP_CILIOPATHIES	155	1.07671	0.29803	0.991613	1	3141
PID_HNF3B_PATHWAY	22	1.07604	0.364807	0.991014	1	3185
REACTOME_INTERLEUKIN_RECEPTOR_SHC_SIGNALING	21	1.07592	0.334792	0.988121	1	3772
KEGG_CYSTEINE_AND_METHIONINE_METABOLISM	26	1.07472	0.334052	0.989779	1	2767
REACTOME_NEDDYLATION	212	1.07369	0.270886	0.990614	1	3527
WP_FRAGILE_X_SYNDROME	104	1.07331	0.307143	0.988705	1	137
BIOCARTA_IL1R_PATHWAY	27	1.0728	0.348993	0.987316	1	2376
BIOCARTA_EPO_PATHWAY	18	1.07181	0.355509	0.987889	1	1153
REACTOME_TNFR2_NON_CANONICAL_NF_KB_PATHWAY	90	1.07148	0.323944	0.985921	1	3527
WP_NAD_METABOLISM_IN_ONCOGENEINDUCED_SENESCENCE_AND_MITOCHONDRIAL_DYSFUNCTIONASSOCIATED_SENESCENCE	21	1.07083	0.354167	0.985142	1	2114
REACTOME_SEPARATION_OF_SISTER_CHROMATIDS	179	1.06924	0.314815	0.988318	1	4762
REACTOME_NETRIN_1_SIGNALING	40	1.06873	0.352052	0.987298	1	738
WP_NUCLEAR_RECEPTORS_METAPATHWAY	214	1.06788	0.243968	0.98726	1	3115
REACTOME_PURINERGIC_SIGNALING_IN_LEISHMANIASIS_INFECTION	23	1.06782	0.358369	0.984234	1	2037
WP_KYNURENINE_PATHWAY_AND_LINKS_TO_CELLULAR_SENESCENCE	17	1.06701	0.364017	0.98435	1	1342
REACTOME_DNA_DAMAGE_BYPASS	48	1.06504	0.317422	0.989073	1	5210
REACTOME_NEGATIVE_REGULATION_OF_NOTCH4_SIGNALING	54	1.06444	0.346847	0.988286	1	5118
KEGG_TRYPTOPHAN_METABOLISM	29	1.06023	0.388769	1	1	999
REACTOME_PHOSPHOLIPID_METABOLISM	174	1.05982	0.309633	1	1	3281
WP_NEURAL_CREST_CELL_MIGRATION_IN_CANCER	36	1.05893	0.34375	1	1	1153
WP_VITAMIN_D_RECEPTOR_PATHWAY	110	1.05528	0.346062	1	1	1409
PID_BMP_PATHWAY	34	1.05484	0.375291	1	1	1564
REACTOME_ABC_TRANSPORTER_DISORDERS	66	1.0543	0.351039	1	1	5118
WP_ARYL_HYDROCARBON_RECEPTOR_PATHWAY	35	1.0535	0.346723	1	1	2360
REACTOME_APC_C_CDH1_MEDIATED_DEGRADATION_OF_CDC20_AND_OTHER_APC_C_CDH1_TARGETED_PROTEINS_IN_LATE_MITOSIS_EARLY_G1	72	1.05336	0.330357	1	1	5118
REACTOME_CELL_CYCLE_CHECKPOINTS	266	1.0512	0.295739	1	1	4582
REACTOME_FLT3_SIGNALING	36	1.05057	0.37587	1	1	3527
REACTOME_DEGRADATION_OF_DVL	54	1.04737	0.360802	1	1	5118
KEGG_DRUG_METABOLISM_OTHER_ENZYMES	20	1.04727	0.394572	1	1	1729
BIOCARTA_HDAC_PATHWAY	23	1.04478	0.414784	1	1	2669
REACTOME_COLLAGEN_FORMATION	68	1.04398	0.378022	1	1	2791
REACTOME_REGULATION_OF_HMOX1_EXPRESSION_AND_ACTIVITY	63	1.04091	0.364444	1	1	5118
PID_NCADHERIN_PATHWAY	31	1.03873	0.393305	1	1	28
REACTOME_EPHA_MEDIATED_GROWTH_CONE_COLLAPSE	23	1.03871	0.418259	1	1	914
WP_NANOMATERIAL_INDUCED_APOPTOSIS	20	1.03866	0.39604	1	1	2602
REACTOME_PLATELET_SENSITIZATION_BY_LDL	15	1.03601	0.4158	1	1	274
WP_REGUCALCIN_IN_PROXIMAL_TUBULE_EPITHELIAL_KIDNEY_CELLS	25	1.03118	0.39375	1	1	3444
REACTOME_TNF_SIGNALING	43	1.02866	0.407025	1	1	3527
PID_IL2_STAT5_PATHWAY	29	1.02637	0.406667	1	1	2504
PID_INTEGRIN_A4B1_PATHWAY	29	1.02429	0.401766	1	1	905
REACTOME_POTASSIUM_CHANNELS	50	1.02346	0.418919	1	1	1570
REACTOME_PLATELET_HOMEOSTASIS	57	1.02333	0.392435	1	1	1563
REACTOME_REGULATED_NECROSIS	50	1.02314	0.401709	1	1	4106
REACTOME_CYTOSOLIC_SENSORS_OF_PATHOGEN_ASSOCIATED_DNA	60	1.023	0.393103	1	1	3555
BIOCARTA_PROTEASOME_PATHWAY	19	1.02132	0.411392	1	1	4265
REACTOME_RIP_MEDIATED_NFKB_ACTIVATION_VIA_ZBP1	15	1.0211	0.431461	1	1	1600
REACTOME_ADORA2B_MEDIATED_ANTI_INFLAMMATORY_CYTOKINES_PRODUCTION	48	1.01811	0.406593	1	1	1563
REACTOME_RHOU_GTPASE_CYCLE	33	1.01795	0.433255	1	1	2758
REACTOME_RESOLUTION_OF_SISTER_CHROMATID_COHESION	116	1.0162	0.4	1	1	4698
REACTOME_G_PROTEIN_BETA_GAMMA_SIGNALLING	24	1.0131	0.420091	1	1	2068
REACTOME_SIGNALING_BY_CSF3_G_CSF	27	1.01283	0.427646	1	1	3527
REACTOME_FC_EPSILON_RECEPTOR_FCERI_SIGNALING	121	1.01095	0.414118	1	1	3527
PID_AVB3_OPN_PATHWAY	30	1.00948	0.415385	1	1	3134
PID_AJDISS_2PATHWAY	42	1.00595	0.426009	1	1	137
BIOCARTA_TFF_PATHWAY	19	1.00492	0.460888	1	1	2400
REACTOME_TRANSCRIPTIONAL_REGULATION_BY_RUNX1	182	1.0002	0.422111	1	1	2240
REACTOME_INTERLEUKIN_4_AND_INTERLEUKIN_13_SIGNALING	82	0.99887	0.458696	1	1	1656
REACTOME_KERATAN_SULFATE_BIOSYNTHESIS	18	0.998672	0.455338	1	1	2627
PID_TNF_PATHWAY	46	0.997601	0.432243	1	1	3429
PID_IL12_STAT4_PATHWAY	29	0.99667	0.43573	1	1	3021
WP_APOPTOSISRELATED_NETWORK_DUE_TO_ALTERED_NOTCH3_IN_OVARIAN_CANCER	53	0.995859	0.469933	1	1	4493
REACTOME_APC_CDC20_MEDIATED_DEGRADATION_OF_NEK2A	26	0.994729	0.461364	1	1	4060
REACTOME_NON_INTEGRIN_MEMBRANE_ECM_INTERACTIONS	50	0.994196	0.463415	1	1	1949
REACTOME_INTRA_GOLGI_TRAFFIC	43	0.993169	0.475225	1	1	3893
WP_NETRINUNC5B_SIGNALING_PATHWAY	43	0.992502	0.452381	1	1	617
KEGG_AXON_GUIDANCE	113	0.992152	0.458234	1	1	914
REACTOME_RESPONSE_OF_EIF2AK1_HRI_TO_HEME_DEFICIENCY	15	0.99167	0.476578	1	1	1950
WP_HAIR_FOLLICLE_DEVELOPMENT_CYTODIFFERENTIATION_PART_3_OF_3	57	0.990617	0.443459	1	1	2902
REACTOME_PLATELET_AGGREGATION_PLUG_FORMATION	27	0.989853	0.44921	1	1	905
KEGG_P53_SIGNALING_PATHWAY	63	0.989512	0.476298	1	1	3165
REACTOME_BUTYRATE_RESPONSE_FACTOR_1_BRF1_BINDS_AND_DESTABILIZES_MRNA	17	0.988821	0.471739	1	1	1005
WP_PATHWAYS_REGULATING_HIPPO_SIGNALING	76	0.986241	0.495516	1	1	2068
WP_ALPHA_6_BETA_4_SIGNALING_PATHWAY	32	0.985966	0.506696	1	1	225
REACTOME_APC_C_CDC20_MEDIATED_DEGRADATION_OF_CYCLIN_B	24	0.984069	0.45987	1	1	4060
REACTOME_NUCLEAR_SIGNALING_BY_ERBB4	27	0.983568	0.481562	1	1	314
REACTOME_NEUTROPHIL_DEGRANULATION	359	0.981337	0.505714	1	1	2147
BIOCARTA_IL12_PATHWAY	18	0.977268	0.492662	1	1	1119
REACTOME_ACTIVATION_OF_ATR_IN_RESPONSE_TO_REPLICATION_STRESS	37	0.976802	0.475751	1	1	3214
REACTOME_SULFUR_AMINO_ACID_METABOLISM	23	0.975925	0.465812	1	1	1070
REACTOME_TNF_RECEPTOR_SUPERFAMILY_TNFSF_MEMBERS_MEDIATING_NON_CANONICAL_NF_KB_PATHWAY	16	0.975889	0.479029	1	1	2312
WP_METHIONINE_DE_NOVO_AND_SALVAGE_PATHWAY	18	0.97488	0.478652	1	1	2126
REACTOME_G_ALPHA_Z_SIGNALLING_EVENTS	34	0.972757	0.504274	1	1	3720
REACTOME_CARGO_TRAFFICKING_TO_THE_PERICILIARY_MEMBRANE	44	0.972571	0.491031	1	1	5345
REACTOME_UNFOLDED_PROTEIN_RESPONSE_UPR	90	0.97209	0.506637	1	1	2087
PID_AVB3_INTEGRIN_PATHWAY	62	0.971633	0.509132	1	1	1556
BIOCARTA_ARAP_PATHWAY	17	0.971475	0.497826	1	1	1346
REACTOME_EXTRACELLULAR_MATRIX_ORGANIZATION	210	0.97057	0.534574	1	1	1638
REACTOME_SYNTHESIS_OF_PA	28	0.969514	0.501027	1	1	4641
REACTOME_IKK_COMPLEX_RECRUITMENT_MEDIATED_BY_RIP1	20	0.968206	0.508621	1	1	3527
REACTOME_CILIUM_ASSEMBLY	182	0.967475	0.564792	1	1	4331
WP_ID_SIGNALING_PATHWAY	15	0.96649	0.52193	1	1	31
WP_MIRNA_REGULATION_OF_DNA_DAMAGE_RESPONSE	67	0.965379	0.506696	1	1	4838
REACTOME_GAB1_SIGNALOSOME	15	0.964376	0.528302	1	1	59
BIOCARTA_BCELLSURVIVAL_PATHWAY	15	0.964051	0.515021	1	1	1254
PID_EPHA2_FWD_PATHWAY	19	0.963013	0.529167	1	1	130
REACTOME_TRAF6_MEDIATED_NF_KB_ACTIVATION	22	0.962477	0.517162	1	1	4743
REACTOME_CARGO_CONCENTRATION_IN_THE_ER	30	0.960658	0.501124	1	1	4340
REACTOME_REGULATION_OF_RUNX1_EXPRESSION_AND_ACTIVITY	17	0.960052	0.522267	1	1	2874
WP_GASTRIC_CANCER_NETWORK_2	29	0.959818	0.509132	1	1	3107
PID_TCR_PATHWAY	60	0.95833	0.541475	1	1	1651
PID_GMCSF_PATHWAY	33	0.956589	0.501119	1	1	3381
REACTOME_PROCESSING_OF_SMDT1	16	0.955555	0.526427	1	1	3319
REACTOME_NUCLEOBASE_CATABOLISM	25	0.95455	0.534632	1	1	1792
REACTOME_REGULATION_OF_TP53_ACTIVITY_THROUGH_METHYLATION	18	0.954293	0.511879	1	1	4543
KEGG_GLYCOSAMINOGLYCAN_BIOSYNTHESIS_CHONDROITIN_SULFATE	19	0.953909	0.495798	1	1	2290
WP_TGFBETA_RECEPTOR_SIGNALING	47	0.953778	0.527594	1	1	3444
WP_APOPTOSIS_MODULATION_BY_HSP70	18	0.951543	0.557484	1	1	2602
REACTOME_G_BETA_GAMMA_SIGNALLING_THROUGH_PI3KGAMMA	18	0.951157	0.523908	1	1	430
PID_CD8_TCR_PATHWAY	50	0.949694	0.548315	1	1	3262
WP_CANCER_IMMUNOTHERAPY_BY_PD1_BLOCKADE	23	0.948982	0.511879	1	1	2233
PID_AMB2_NEUTROPHILS_PATHWAY	30	0.948541	0.554393	1	1	23
REACTOME_DISORDERS_OF_TRANSMEMBRANE_TRANSPORTERS	129	0.945948	0.581818	1	1	4265
REACTOME_MYOGENESIS	22	0.944838	0.526971	1	1	3038
REACTOME_ABC_FAMILY_PROTEINS_MEDIATED_TRANSPORT	85	0.944379	0.562802	1	1	5118
REACTOME_CLASS_I_MHC_MEDIATED_ANTIGEN_PROCESSING_PRESENTATION	335	0.944274	0.671429	1	1	4270
REACTOME_NOTCH2_ACTIVATION_AND_TRANSMISSION_OF_SIGNAL_TO_THE_NUCLEUS	21	0.944035	0.538947	1	1	3527
REACTOME_ANTIGEN_ACTIVATES_B_CELL_RECEPTOR_BCR_LEADING_TO_GENERATION_OF_SECOND_MESSENGERS	24	0.942991	0.546948	1	1	1301
REACTOME_PI3K_EVENTS_IN_ERBB2_SIGNALING	15	0.941791	0.54185	1	1	110
WP_EXTRACELLULAR_VESICLES_IN_THE_CROSSTALK_OF_CARDIAC_CELLS	18	0.940693	0.546053	1	1	1031
WP_GENOTOXICITY_PATHWAY	53	0.940413	0.568539	1	1	3245
BIOCARTA_G2_PATHWAY	23	0.937218	0.525	1	1	3384
WP_HEAD_AND_NECK_SQUAMOUS_CELL_CARCINOMA	70	0.93579	0.584091	1	1	3788
REACTOME_SIGNALING_BY_NOTCH2	30	0.935208	0.574194	1	1	3527
REACTOME_TRANSPORT_OF_INORGANIC_CATIONS_ANIONS_AND_AMINO_ACIDS_OLIGOPEPTIDES	65	0.935164	0.575342	1	1	2000
KEGG_ARGININE_AND_PROLINE_METABOLISM	41	0.934143	0.557447	1	1	3199
BIOCARTA_CXCR4_PATHWAY	18	0.934116	0.556723	1	1	1242
REACTOME_SIGNALING_BY_INTERLEUKINS	360	0.933632	0.736413	1	1	2213
REACTOME_MITOCHONDRIAL_CALCIUM_ION_TRANSPORT	22	0.933129	0.539863	1	1	6075
PID_TCR_CALCIUM_PATHWAY	27	0.933062	0.566667	1	1	2993
WP_DNA_DAMAGE_RESPONSE	64	0.933035	0.56351	1	1	4838
PID_ATF2_PATHWAY	49	0.930944	0.594966	1	1	2214
REACTOME_THE_NLRP3_INFLAMMASOME	15	0.930277	0.553145	1	1	2977
BIOCARTA_RELA_PATHWAY	15	0.925815	0.555556	1	1	3134
REACTOME_SIGNALING_BY_ERBB2_IN_CANCER	25	0.925468	0.564756	1	1	110
REACTOME_SYNTHESIS_OF_PC	24	0.924444	0.554585	1	1	571
REACTOME_SIGNALING_BY_FLT3_FUSION_PROTEINS	19	0.922362	0.577093	1	1	3447
REACTOME_GRB2_EVENTS_IN_ERBB2_SIGNALING	15	0.922162	0.555556	1	1	110
REACTOME_DEGRADATION_OF_AXIN	53	0.921894	0.58465	1	1	5148
REACTOME_METAL_ION_SLC_TRANSPORTERS	17	0.921745	0.545872	1	1	2958
REACTOME_HOMOLOGOUS_DNA_PAIRING_AND_STRAND_EXCHANGE	42	0.92126	0.573661	1	1	4509
KEGG_NATURAL_KILLER_CELL_MEDIATED_CYTOTOXICITY	91	0.920863	0.635104	1	1	2439
REACTOME_LEISHMANIA_INFECTION	149	0.918405	0.676617	1	1	1592
REACTOME_NUCLEAR_PORE_COMPLEX_NPC_DISASSEMBLY	36	0.91833	0.579439	1	1	4094
REACTOME_HDR_THROUGH_SINGLE_STRAND_ANNEALING_SSA	37	0.917522	0.573696	1	1	4509
REACTOME_N_GLYCAN_ANTENNAE_ELONGATION_IN_THE_MEDIAL_TRANS_GOLGI	21	0.915903	0.575163	1	1	1935
REACTOME_SIGNALING_BY_BMP	21	0.915715	0.585648	1	1	3444
PID_FOXO_PATHWAY	46	0.915612	0.587853	1	1	4059
BIOCARTA_ATM_PATHWAY	20	0.915607	0.561404	1	1	4543
REACTOME_GLUTATHIONE_CONJUGATION	25	0.91552	0.576497	1	1	2738
WP_HEPATITIS_B_INFECTION	129	0.914525	0.669879	1	1	3444
KEGG_ARRHYTHMOGENIC_RIGHT_VENTRICULAR_CARDIOMYOPATHY_ARVC	55	0.913185	0.600441	1	1	1834
BIOCARTA_NFKB_PATHWAY	21	0.912935	0.591489	1	1	3434
WP_SUDDEN_INFANT_DEATH_SYNDROME_SIDS_SUSCEPTIBILITY_PATHWAYS	109	0.912537	0.683146	1	1	3470
REACTOME_FOXO_MEDIATED_TRANSCRIPTION	53	0.912274	0.628635	1	1	3444
WP_ARRHYTHMOGENIC_RIGHT_VENTRICULAR_CARDIOMYOPATHY	55	0.912208	0.610132	1	1	1834
WP_MBDNF_AND_PROBDNF_REGULATION_OF_GABA_NEUROTRANSMISSION	28	0.91204	0.614537	1	1	1125
REACTOME_INTERLEUKIN_1_SIGNALING	94	0.911946	0.671429	1	1	5466
REACTOME_PLATELET_ACTIVATION_SIGNALING_AND_AGGREGATION	193	0.911045	0.721675	1	1	1793
REACTOME_HDMS_DEMETHYLATE_HISTONES	24	0.908913	0.617521	1	1	3311
BIOCARTA_CELLCYCLE_PATHWAY	23	0.908473	0.61039	1	1	1131
WP_TGFBETA_RECEPTOR_SIGNALLING_IN_SKELETAL_DYSPLASIAS	49	0.908466	0.590336	1	1	1568
REACTOME_INTERLEUKIN_37_SIGNALING	18	0.907797	0.59081	1	1	1517
WP_FLUOROPYRIMIDINE_ACTIVITY	26	0.907411	0.604555	1	1	1319
WP_FOCAL_ADHESIONPI3KAKTMTORSIGNALING_PATHWAY	226	0.906811	0.74	1	1	1885
WP_GDNFRET_SIGNALLING_AXIS	19	0.905721	0.607803	1	1	2065
REACTOME_C_TYPE_LECTIN_RECEPTORS_CLRS	115	0.904293	0.671498	1	1	3527
REACTOME_PHOSPHORYLATION_OF_THE_APC_C	20	0.904154	0.604651	1	1	4060
REACTOME_METABOLIC_DISORDERS_OF_BIOLOGICAL_OXIDATION_ENZYMES	20	0.903269	0.580994	1	1	2018
PID_PI3KCI_PATHWAY	41	0.903005	0.592672	1	1	2932
REACTOME_SLC_MEDIATED_TRANSMEMBRANE_TRANSPORT	145	0.901547	0.681716	1	1	2371
WP_TRANSSULFURATION_AND_ONE_CARBON_METABOLISM	28	0.900389	0.60166	1	1	2126
PID_ERBB4_PATHWAY	33	0.900317	0.607623	1	1	110
PID_LYMPH_ANGIOGENESIS_PATHWAY	23	0.900136	0.587738	1	1	3086
BIOCARTA_STRESS_PATHWAY	24	0.899696	0.616228	1	1	4372
KEGG_TGF_BETA_SIGNALING_PATHWAY	68	0.897252	0.676991	1	1	1564
REACTOME_ORC1_REMOVAL_FROM_CHROMATIN	69	0.896111	0.662621	1	1	5118
REACTOME_SIGNALING_BY_PDGFR_IN_DISEASE	17	0.89414	0.582251	1	1	3381
REACTOME_KERATAN_SULFATE_KERATIN_METABOLISM	24	0.891716	0.614537	1	1	2627
WP_MIRNA_REGULATION_OF_P53_PATHWAY_IN_PROSTATE_CANCER	22	0.891683	0.628571	1	1	3859
REACTOME_DOWNREGULATION_OF_SMAD2_3_SMAD4_TRANSCRIPTIONAL_ACTIVITY	23	0.891313	0.596234	1	1	4048
BIOCARTA_NKT_PATHWAY	22	0.890131	0.644796	1	1	2109
WP_ENDOTHELIN_PATHWAYS	22	0.889259	0.622081	1	1	904
REACTOME_PEROXISOMAL_LIPID_METABOLISM	25	0.88844	0.589633	1	1	1359
BIOCARTA_IL2RB_PATHWAY	37	0.888047	0.651357	1	1	2504
REACTOME_GROWTH_HORMONE_RECEPTOR_SIGNALING	20	0.884952	0.626531	1	1	3429
BIOCARTA_RAS_PATHWAY	22	0.884379	0.613043	1	1	3457
REACTOME_STRIATED_MUSCLE_CONTRACTION	16	0.882736	0.614035	1	1	1505
PID_NFKAPPAB_CANONICAL_PATHWAY	21	0.882341	0.623608	1	1	4505
REACTOME_MITOTIC_PROMETAPHASE	193	0.881476	0.789976	1	1	4698
REACTOME_RECEPTOR_TYPE_TYROSINE_PROTEIN_PHOSPHATASES	15	0.881346	0.600849	1	1	2376
WP_STRIATED_MUSCLE_CONTRACTION_PATHWAY	19	0.880976	0.626582	1	1	1505
WP_ONCOSTATIN_M_SIGNALING_PATHWAY	63	0.878822	0.728111	1	1	1615
KEGG_VALINE_LEUCINE_AND_ISOLEUCINE_DEGRADATION	41	0.878136	0.638826	1	1	4614
REACTOME_REGULATION_OF_RUNX3_EXPRESSION_AND_ACTIVITY	55	0.877438	0.679287	1	1	5118
REACTOME_TRAFFICKING_OF_AMPA_RECEPTORS	21	0.874943	0.640969	1	1	40
PID_ATM_PATHWAY	34	0.872742	0.658427	1	1	4679
REACTOME_LAMININ_INTERACTIONS	28	0.8719	0.638767	1	1	2139
WP_NEPHROTIC_SYNDROME	38	0.868327	0.689189	1	1	2120
WP_HEPATITIS_C_AND_HEPATOCELLULAR_CARCINOMA	46	0.867485	0.676744	1	1	1540
REACTOME_ZBP1_DAI_MEDIATED_INDUCTION_OF_TYPE_I_IFNS	18	0.867342	0.621681	1	1	1600
WP_MAMMARY_GLAND_DEVELOPMENT_PATHWAY_PREGNANCY_AND_LACTATION_STAGE_3_OF_4	24	0.867291	0.66302	1	1	2255
REACTOME_SENESCENCE_ASSOCIATED_SECRETORY_PHENOTYPE_SASP	71	0.865649	0.767033	1	1	2765
REACTOME_SWITCHING_OF_ORIGINS_TO_A_POST_REPLICATIVE_STATE	89	0.863142	0.738609	1	1	5118
REACTOME_NUCLEOTIDE_SALVAGE	21	0.862883	0.65721	1	1	2697
REACTOME_TGF_BETA_RECEPTOR_SIGNALING_IN_EMT_EPITHELIAL_TO_MESENCHYMAL_TRANSITION	16	0.862433	0.655098	1	1	2419
REACTOME_SUMOYLATION_OF_INTRACELLULAR_RECEPTORS	24	0.861909	0.670146	1	1	321
REACTOME_GPVI_MEDIATED_ACTIVATION_CASCADE	27	0.861844	0.675381	1	1	1393
WP_CANONICAL_AND_NONCANONICAL_TGFB_SIGNALING	16	0.861371	0.645923	1	1	1348
REACTOME_MAPK_FAMILY_SIGNALING_CASCADES	275	0.861208	0.899015	1	1	2267
WP_HOSTPATHOGEN_INTERACTION_OF_HUMAN_CORONA_VIRUSES_AUTOPHAGY	19	0.85811	0.672018	1	1	4021
REACTOME_TRANSLESION_SYNTHESIS_BY_POLK	17	0.858051	0.62753	1	1	4484
REACTOME_G2_M_CHECKPOINTS	143	0.857454	0.842105	1	1	3527
KEGG_RENAL_CELL_CARCINOMA	64	0.85664	0.741573	1	1	544
REACTOME_MAP3K8_TPL2_DEPENDENT_MAPK1_3_ACTIVATION	16	0.856249	0.633262	1	1	5222
REACTOME_TNFR1_INDUCED_NFKAPPAB_SIGNALING_PATHWAY	30	0.856147	0.688453	1	1	1254
REACTOME_HS_GAG_DEGRADATION	20	0.855948	0.672764	1	1	2036
BIOCARTA_TOLL_PATHWAY	23	0.855492	0.669584	1	1	4372
WP_MFAP5_EFFECT_ON_PERMEABILITY_AND_MOTILITY_OF_ENDOTHELIAL_CELLS_VIA_CYTOSKELETON_REARRANGEMENT	16	0.855013	0.666667	1	1	2009
KEGG_ERBB_SIGNALING_PATHWAY	78	0.854635	0.763761	1	1	544
WP_IL1_SIGNALING_PATHWAY	52	0.853825	0.742222	1	1	2524
WP_SELECTIVE_EXPRESSION_OF_CHEMOKINE_RECEPTORS_DURING_TCELL_POLARIZATION	23	0.851632	0.655738	1	1	2109
REACTOME_TRANSCRIPTIONAL_REGULATION_BY_RUNX3	96	0.850052	0.795824	1	1	3527
KEGG_B_CELL_RECEPTOR_SIGNALING_PATHWAY	65	0.849963	0.755411	1	1	3281
REACTOME_SIGNALING_BY_EGFR_IN_CANCER	23	0.848602	0.665948	1	1	59
REACTOME_PROTEIN_UBIQUITINATION	70	0.844824	0.779221	1	1	3661
KEGG_PHOSPHATIDYLINOSITOL_SIGNALING_SYSTEM	68	0.841355	0.784091	1	1	2400
REACTOME_NICOTINATE_METABOLISM	26	0.840591	0.701863	1	1	2205
REACTOME_HEMOSTASIS	436	0.839244	0.971671	1	1	1930
REACTOME_SIGNALING_BY_NOTCH4	81	0.839216	0.793578	1	1	3527
SIG_PIP3_SIGNALING_IN_B_LYMPHOCYTES	32	0.838919	0.717949	1	1	1301
WP_SMALL_CELL_LUNG_CANCER	89	0.838691	0.826698	1	1	2602
WP_NAD_BIOSYNTHETIC_PATHWAYS	20	0.836097	0.701327	1	1	5311
WP_IL2_SIGNALING_PATHWAY	42	0.834528	0.74424	1	1	1393
REACTOME_CELLULAR_RESPONSE_TO_HYPOXIA	70	0.833217	0.794686	1	1	5118
WP_TYPE_I_COLLAGEN_SYNTHESIS_IN_THE_CONTEXT_OF_OSTEOGENESIS_IMPERFECTA	29	0.832902	0.7173	1	1	1372
REACTOME_SIGNALING_BY_ERBB4	50	0.832437	0.761488	1	1	314
WP_16P112_DISTAL_DELETION_SYNDROME	18	0.83113	0.667426	1	1	1003
REACTOME_E3_UBIQUITIN_LIGASES_UBIQUITINATE_TARGET_PROTEINS	50	0.830866	0.75162	1	1	3661
REACTOME_AUF1_HNRNP_D0_BINDS_AND_DESTABILIZES_MRNA	53	0.829532	0.745455	1	1	5118
REACTOME_CHAPERONE_MEDIATED_AUTOPHAGY	18	0.829201	0.714286	1	1	3616
BIOCARTA_CTCF_PATHWAY	22	0.828784	0.710583	1	1	3934
PID_CD8_TCR_DOWNSTREAM_PATHWAY	50	0.828112	0.771812	1	1	2993
WP_TRYPTOPHAN_METABOLISM	24	0.827901	0.689508	1	1	999
REACTOME_REGULATION_OF_BETA_CELL_DEVELOPMENT	23	0.827654	0.708241	1	1	3027
REACTOME_INFLAMMASOMES	19	0.826418	0.698312	1	1	3737
REACTOME_MAPK6_MAPK4_SIGNALING	86	0.825161	0.812065	1	1	3527
REACTOME_TRANSLESION_SYNTHESIS_BY_POLH	19	0.82457	0.71822	1	1	3527
BIOCARTA_NGF_PATHWAY	18	0.819331	0.712302	1	1	1153
BIOCARTA_FAS_PATHWAY	30	0.818701	0.741935	1	1	4493
REACTOME_METABOLISM_OF_CARBOHYDRATES	232	0.817799	0.919395	1	1	2419
WP_REGULATION_OF_APOPTOSIS_BY_PARATHYROID_HORMONERELATED_PROTEIN	19	0.816621	0.73251	1	1	430
PID_P53_DOWNSTREAM_PATHWAY	124	0.815213	0.883117	1	1	3245
REACTOME_NEPHRIN_FAMILY_INTERACTIONS	19	0.813214	0.730526	1	1	3905
REACTOME_L1CAM_INTERACTIONS	97	0.812954	0.863636	1	1	1856
REACTOME_ESTROGEN_DEPENDENT_NUCLEAR_EVENTS_DOWNSTREAM_OF_ESR_MEMBRANE_SIGNALING	22	0.81278	0.733059	1	1	1369
PID_EPO_PATHWAY	30	0.811929	0.75813	1	1	1003
PID_INTEGRIN_CS_PATHWAY	22	0.809964	0.698824	1	1	1590
KEGG_OOCYTE_MEIOSIS	92	0.809275	0.856132	1	1	3990
REACTOME_NICOTINAMIDE_SALVAGING	16	0.808041	0.707589	1	1	1989
REACTOME_DISEASES_OF_SIGNAL_TRANSDUCTION_BY_GROWTH_FACTOR_RECEPTORS_AND_SECOND_MESSENGERS	346	0.806539	0.988439	1	1	3527
WP_INTERLEUKIN11_SIGNALING_PATHWAY	41	0.80407	0.776053	1	1	1003
REACTOME_ASSEMBLY_OF_THE_PRE_REPLICATIVE_COMPLEX	66	0.802878	0.82774	1	1	5197
REACTOME_O_GLYCOSYLATION_OF_TSR_DOMAIN_CONTAINING_PROTEINS	26	0.802616	0.781971	1	1	2085
REACTOME_SYNTHESIS_OF_PIPS_AT_THE_GOLGI_MEMBRANE	15	0.801558	0.709607	1	1	4021
REACTOME_INHIBITION_OF_THE_PROTEOLYTIC_ACTIVITY_OF_APC_C_REQUIRED_FOR_THE_ONSET_OF_ANAPHASE_BY_MITOTIC_SPINDLE_CHECKPOINT_COMPONENTS	21	0.800961	0.77521	1	1	4060
WP_ONE_CARBON_METABOLISM	22	0.800112	0.773148	1	1	2126
BIOCARTA_FMLP_PATHWAY	30	0.799054	0.796537	1	1	41
REACTOME_RHOH_GTPASE_CYCLE	34	0.797563	0.796646	1	1	2823
KEGG_PROGESTERONE_MEDIATED_OOCYTE_MATURATION	73	0.794963	0.833333	1	1	3692
REACTOME_SIGNALING_BY_HIPPO	20	0.793839	0.8	1	1	5337
REACTOME_SYNDECAN_INTERACTIONS	24	0.793776	0.781585	1	1	1860
BIOCARTA_GLEEVEC_PATHWAY	23	0.793359	0.78525	1	1	2400
REACTOME_CD28_DEPENDENT_PI3K_AKT_SIGNALING	20	0.793358	0.759219	1	1	1615
PID_IL2_1PATHWAY	55	0.79277	0.826879	1	1	1525
REACTOME_TP53_REGULATES_TRANSCRIPTION_OF_ADDITIONAL_CELL_CYCLE_GENES_WHOSE_EXACT_ROLE_IN_THE_P53_PATHWAY_REMAIN_UNCERTAIN	21	0.792013	0.747768	1	1	3245
WP_ATM_SIGNALING_PATHWAY	40	0.791901	0.799076	1	1	4775
REACTOME_ELASTIC_FIBRE_FORMATION	32	0.790287	0.787081	1	1	1927
REACTOME_ANTIGEN_PROCESSING_UBIQUITINATION_PROTEASOME_DEGRADATION	282	0.789518	0.98731	1	1	3527
PID_WNT_SIGNALING_PATHWAY	18	0.789041	0.75803	1	1	4311
REACTOME_SARS_COV_1_INFECTION	47	0.78791	0.812933	1	1	4366
REACTOME_INTRAFLAGELLAR_TRANSPORT	47	0.787836	0.818574	1	1	3583
REACTOME_IL_6_TYPE_CYTOKINE_RECEPTOR_LIGAND_INTERACTIONS	15	0.7874	0.757455	1	1	2504
REACTOME_TOLL_LIKE_RECEPTOR_CASCADES	126	0.786133	0.929577	1	1	4869
PID_PLK1_PATHWAY	45	0.785599	0.843818	1	1	5135
WP_NEURAL_CREST_CELL_MIGRATION_DURING_DEVELOPMENT	33	0.783633	0.807611	1	1	1153
PID_FANCONI_PATHWAY	46	0.781899	0.819127	1	1	5128
WP_NRF2ARE_REGULATION	22	0.78173	0.78714	1	1	1298
REACTOME_ACTIVATION_OF_IRF3_IRF7_MEDIATED_BY_TBK1_IKK_EPSILON	15	0.780772	0.73176	1	1	3940
WP_DNA_DAMAGE_RESPONSE_ONLY_ATM_DEPENDENT	96	0.78047	0.923809	1	1	1834
PID_FGF_PATHWAY	41	0.780176	0.834862	1	1	2400
WP_ANGIOGENESIS	19	0.780131	0.771739	1	1	1099
WP_RAC1PAK1P38MMP2_PATHWAY	60	0.779356	0.882489	1	1	4493
REACTOME_SLC_TRANSPORTER_DISORDERS	63	0.774352	0.871041	1	1	3856
REACTOME_REGULATION_OF_PLK1_ACTIVITY_AT_G2_M_TRANSITION	87	0.774189	0.898383	1	1	5016
REACTOME_SARS_COV_2_INFECTION	64	0.77231	0.910941	1	1	4366
PID_TXA2PATHWAY	43	0.772235	0.849224	1	1	431
WP_SIGNALING_PATHWAYS_IN_GLIOBLASTOMA	77	0.76916	0.894737	1	1	3262
WP_IL17_SIGNALING_PATHWAY	26	0.768634	0.802128	1	1	2504
WP_CILIARY_LANDSCAPE	206	0.766981	0.976864	1	1	5638
BIOCARTA_VEGF_PATHWAY	25	0.764887	0.821586	1	1	3323
REACTOME_DNA_REPLICATION	125	0.762257	0.957111	1	1	3527
WP_GLOBO_SPHINGOLIPID_METABOLISM	15	0.760364	0.786957	1	1	1262
REACTOME_SIGNALING_BY_NTRK2_TRKB	22	0.760196	0.800443	1	1	3847
WP_P53_TRANSCRIPTIONAL_GENE_NETWORK	60	0.759361	0.867679	1	1	3245
PID_AURORA_A_PATHWAY	31	0.757317	0.857143	1	1	3990
REACTOME_ABERRANT_REGULATION_OF_MITOTIC_EXIT_IN_CANCER_DUE_TO_RB1_DEFECTS	20	0.756965	0.814159	1	1	4060
REACTOME_SIGNALING_BY_MET	69	0.756304	0.917411	1	1	1082
REACTOME_ASYMMETRIC_LOCALIZATION_OF_PCP_PROTEINS	62	0.755148	0.909692	1	1	5118
WP_ALZHEIMERS_DISEASE	72	0.753402	0.943794	1	1	3429
REACTOME_CD28_CO_STIMULATION	31	0.753141	0.860927	1	1	1615
WP_RAS_SIGNALING	141	0.751985	0.972772	1	1	1563
REACTOME_HDR_THROUGH_HOMOLOGOUS_RECOMBINATION_HRR	65	0.750501	0.907407	1	1	4509
REACTOME_SENSORY_PROCESSING_OF_SOUND_BY_OUTER_HAIR_CELLS_OF_THE_COCHLEA	33	0.75009	0.853659	1	1	1570
WP_HOSTPATHOGEN_INTERACTION_OF_HUMAN_CORONA_VIRUSES_MAPK_SIGNALING	35	0.747842	0.855478	1	1	2211
REACTOME_FACTORS_INVOLVED_IN_MEGAKARYOCYTE_DEVELOPMENT_AND_PLATELET_PRODUCTION	122	0.747838	0.964824	1	1	3021
REACTOME_M_PHASE	363	0.747135	1	1	1	4802
PID_SYNDECAN_2_PATHWAY	31	0.746868	0.837647	1	1	2650
PID_IL1_PATHWAY	30	0.740917	0.853191	1	1	3434
REACTOME_HOST_INTERACTIONS_OF_HIV_FACTORS	127	0.740486	0.973236	1	1	5118
PID_P38_ALPHA_BETA_PATHWAY	27	0.739676	0.857798	1	1	1393
REACTOME_EGFR_DOWNREGULATION	28	0.738605	0.854945	1	1	898
REACTOME_SYNTHESIS_OF_IP3_AND_IP4_IN_THE_CYTOSOL	23	0.738263	0.838574	1	1	3788
WP_B_CELL_RECEPTOR_SIGNALING_PATHWAY	88	0.737591	0.943262	1	1	430
PID_AURORA_B_PATHWAY	39	0.736225	0.892473	1	1	4567
REACTOME_RUNX1_REGULATES_TRANSCRIPTION_OF_GENES_INVOLVED_IN_DIFFERENTIATION_OF_HSCS	84	0.734921	0.955399	1	1	2214
REACTOME_ADRENALINE_NORADRENALINE_INHIBITS_INSULIN_SECRETION	19	0.734659	0.834025	1	1	646
WNT_SIGNALING	68	0.732058	0.932401	1	1	1981
KEGG_AMYOTROPHIC_LATERAL_SCLEROSIS_ALS	42	0.731237	0.891304	1	1	2993
REACTOME_NOTCH3_ACTIVATION_AND_TRANSMISSION_OF_SIGNAL_TO_THE_NUCLEUS	24	0.729782	0.857456	1	1	2419
BIOCARTA_INSULIN_PATHWAY	20	0.728911	0.845291	1	1	1153
REACTOME_REGULATION_OF_MRNA_STABILITY_BY_PROTEINS_THAT_BIND_AU_RICH_ELEMENTS	85	0.728883	0.938326	1	1	3527
BIOCARTA_PDZS_PATHWAY	17	0.727854	0.848073	1	1	3730
REACTOME_REGULATION_OF_TP53_EXPRESSION_AND_DEGRADATION	37	0.726612	0.894967	1	1	2447
REACTOME_G2_M_DNA_DAMAGE_CHECKPOINT	72	0.726315	0.93576	1	1	3384
PID_LYSOPHOSPHOLIPID_PATHWAY	57	0.725449	0.919598	1	1	1535
REACTOME_GENE_SILENCING_BY_RNA	88	0.725287	0.965517	1	1	3433
REACTOME_CYCLIN_D_ASSOCIATED_EVENTS_IN_G1	46	0.724552	0.913044	1	1	2959
PID_TCPTP_PATHWAY	36	0.724448	0.891353	1	1	3591
REACTOME_ASPARAGINE_N_LINKED_GLYCOSYLATION	278	0.724221	0.997305	1	1	3949
KEGG_ACUTE_MYELOID_LEUKEMIA	52	0.723996	0.929705	1	1	430
REACTOME_DISEASES_ASSOCIATED_WITH_N_GLYCOSYLATION_OF_PROTEINS	17	0.722441	0.8234	1	1	2243
REACTOME_SYNTHESIS_OF_ACTIVE_UBIQUITIN_ROLES_OF_E1_AND_E2_ENZYMES	30	0.722397	0.872093	1	1	3527
BIOCARTA_ECM_PATHWAY	18	0.72224	0.857461	1	1	2400
PID_NECTIN_PATHWAY	28	0.720985	0.892774	1	1	2400
PID_FOXM1_PATHWAY	38	0.720684	0.911504	1	1	1746
REACTOME_SIGNALING_BY_HEDGEHOG	131	0.720254	0.976635	1	1	3534
REACTOME_RHOD_GTPASE_CYCLE	45	0.720234	0.897321	1	1	4434
KEGG_STARCH_AND_SUCROSE_METABOLISM	19	0.719449	0.832272	1	1	4388
WP_THYROID_HORMONES_PRODUCTION_AND_THEIR_PERIPHERAL_DOWNSTREAM_SIGNALLING_EFFECTS	64	0.716392	0.931765	1	1	2400
REACTOME_SIGNALING_BY_PTK6	50	0.715585	0.917051	1	1	576
BIOCARTA_KERATINOCYTE_PATHWAY	45	0.712957	0.912134	1	1	1664
REACTOME_TP53_REGULATES_TRANSCRIPTION_OF_GENES_INVOLVED_IN_CYTOCHROME_C_RELEASE	18	0.712512	0.853982	1	1	3165
REACTOME_RETROGRADE_TRANSPORT_AT_THE_TRANS_GOLGI_NETWORK	49	0.710507	0.929742	1	1	5082
REACTOME_PROCESSING_OF_DNA_DOUBLE_STRAND_BREAK_ENDS	76	0.710073	0.95962	1	1	4599
WP_MONOAMINE_TRANSPORT	18	0.709332	0.867327	1	1	2067
REACTOME_DNA_REPLICATION_PRE_INITIATION	82	0.708735	0.966814	1	1	5197
WP_HOSTPATHOGEN_INTERACTION_OF_HUMAN_CORONA_VIRUSES_APOPTOSIS	21	0.707044	0.866812	1	1	2817
WP_NONALCOHOLIC_FATTY_LIVER_DISEASE	137	0.706501	0.97619	1	1	2663
REACTOME_INTERLEUKIN_1_FAMILY_SIGNALING	117	0.705513	0.983721	1	1	2419
PID_SMAD2_3NUCLEAR_PATHWAY	73	0.703809	0.94382	1	1	2469
PID_NOTCH_PATHWAY	49	0.702838	0.934066	1	1	2043
KEGG_PANCREATIC_CANCER	66	0.70144	0.958425	1	1	3457
REACTOME_TRANSPORT_OF_MATURE_TRANSCRIPT_TO_CYTOPLASM	81	0.699328	0.966102	1	1	5175
WP_PI3KAKTMTOR_SIGNALING_PATHWAY_AND_THERAPEUTIC_OPPORTUNITIES	28	0.697662	0.888199	1	1	3262
REACTOME_MITOCHONDRIAL_FATTY_ACID_BETA_OXIDATION	33	0.696519	0.912664	1	1	4492
REACTOME_THE_ROLE_OF_GTSE1_IN_G2_M_PROGRESSION_AFTER_G2_CHECKPOINT	68	0.69641	0.955711	1	1	5118
WP_PATHWAYS_AFFECTED_IN_ADENOID_CYSTIC_CARCINOMA	59	0.695838	0.957717	1	1	3788
BIOCARTA_P53HYPOXIA_PATHWAY	21	0.694026	0.883772	1	1	186
REACTOME_CYCLIN_A_CDK2_ASSOCIATED_EVENTS_AT_S_PHASE_ENTRY	84	0.692677	0.977273	1	1	5118
KEGG_INOSITOL_PHOSPHATE_METABOLISM	51	0.69167	0.938865	1	1	3114
WP_MIR5093P_ALTERATION_OF_YAP1ECM_AXIS	16	0.691336	0.867965	1	1	905
BIOCARTA_STATHMIN_PATHWAY	19	0.69128	0.883065	1	1	5031
BIOCARTA_TOB1_PATHWAY	18	0.691147	0.865031	1	1	1236
REACTOME_MITOTIC_G1_PHASE_AND_G1_S_TRANSITION	147	0.690662	0.99759	1	1	3527
KEGG_CELL_CYCLE	120	0.68934	0.985816	1	1	3692
REACTOME_SIGNALING_BY_NTRK3_TRKC	15	0.688859	0.848421	1	1	3262
WP_PARKINSONS_DISEASE_PATHWAY	34	0.686037	0.907725	1	1	3733
WP_EXTRACELLULAR_VESICLEMEDIATED_SIGNALING_IN_RECIPIENT_CELLS	26	0.686026	0.920354	1	1	950
REACTOME_SIGNALING_BY_CYTOSOLIC_FGFR1_FUSION_MUTANTS	18	0.684681	0.881696	1	1	3381
REACTOME_NOTCH_HLH_TRANSCRIPTION_PATHWAY	28	0.682297	0.910675	1	1	1429
PID_HIF2PATHWAY	30	0.68078	0.922414	1	1	130
KEGG_PROPANOATE_METABOLISM	29	0.680584	0.929825	1	1	1846
REACTOME_LAGGING_STRAND_SYNTHESIS	20	0.680116	0.895918	1	1	3214
WP_DNA_IRDOUBLE_STRAND_BREAKS_DSBS_AND_CELLULAR_RESPONSE_VIA_ATM	55	0.679218	0.963283	1	1	4754
WP_PRIMARY_FOCAL_SEGMENTAL_GLOMERULOSCLEROSIS_FSGS	62	0.678233	0.964523	1	1	2765
REACTOME_DAP12_INTERACTIONS	26	0.677479	0.901288	1	1	3262
REACTOME_ANCHORING_OF_THE_BASAL_BODY_TO_THE_PLASMA_MEMBRANE	97	0.677296	0.979118	1	1	5027
PID_ER_NONGENOMIC_PATHWAY	34	0.676045	0.944072	1	1	3579
WP_CELL_CYCLE	116	0.673195	0.995327	1	1	3692
REACTOME_RNA_POLYMERASE_III_TRANSCRIPTION_INITIATION_FROM_TYPE_3_PROMOTER	28	0.671225	0.934498	1	1	2476
REACTOME_GLUCAGON_LIKE_PEPTIDE_1_GLP1_REGULATES_INSULIN_SECRETION	28	0.66486	0.919908	1	1	1563
PID_BARD1_PATHWAY	29	0.663919	0.943983	1	1	11357
BIOCARTA_IL2_PATHWAY	22	0.662418	0.916155	1	1	4059
WP_PROTEOGLYCAN_BIOSYNTHESIS	18	0.662038	0.913044	1	1	3286
REACTOME_ACTIVATED_NOTCH1_TRANSMITS_SIGNAL_TO_THE_NUCLEUS	28	0.661317	0.9329	1	1	3527
REACTOME_DEADENYLATION_OF_MRNA	25	0.660975	0.906818	1	1	4566
REACTOME_RNA_POLYMERASE_I_TRANSCRIPTION_TERMINATION	31	0.659607	0.942222	1	1	3662
REACTOME_MITOTIC_G2_G2_M_PHASES	189	0.6589	0.997389	1	1	5118
PID_ERA_GENOMIC_PATHWAY	53	0.656273	0.969697	1	1	1298
REACTOME_TRANSPORT_TO_THE_GOLGI_AND_SUBSEQUENT_MODIFICATION	166	0.654908	1	1	1	2300
REACTOME_S_PHASE	159	0.654108	1	1	1	4060
REACTOME_MICRORNA_MIRNA_BIOGENESIS	24	0.653913	0.926991	1	1	2874
BIOCARTA_G1_PATHWAY	28	0.653269	0.944086	1	1	2765
REACTOME_SIGNALING_BY_CTNNB1_PHOSPHO_SITE_MUTANTS	15	0.651934	0.906183	1	1	10912
WP_INTEGRATED_BREAST_CANCER_PATHWAY	141	0.651457	1	1	1	4754
WP_GLYCEROPHOSPHOLIPID_BIOSYNTHETIC_PATHWAY	27	0.650704	0.921348	1	1	4453
REACTOME_MRNA_DECAY_BY_5_TO_3_EXORIBONUCLEASE	15	0.648147	0.881466	1	1	1005
KEGG_NEUROTROPHIN_SIGNALING_PATHWAY	114	0.647209	1	1	1	1664
REACTOME_PROGRAMMED_CELL_DEATH	187	0.646851	1	1	1	4106
REACTOME_ACTIVATION_OF_KAINATE_RECEPTORS_UPON_GLUTAMATE_BINDING	20	0.646214	0.933481	1	1	3720
REACTOME_RESOLUTION_OF_D_LOOP_STRUCTURES_THROUGH_SYNTHESIS_DEPENDENT_STRAND_ANNEALING_SDSA	26	0.645693	0.927505	1	1	4509
REACTOME_DUAL_INCISION_IN_GG_NER	41	0.645473	0.962389	1	1	3650
WP_PDGFRBETA_PATHWAY	28	0.643783	0.943052	1	1	3445
REACTOME_SUMOYLATION_OF_DNA_REPLICATION_PROTEINS	46	0.643333	0.978308	1	1	4094
KEGG_SNARE_INTERACTIONS_IN_VESICULAR_TRANSPORT	37	0.642524	0.963907	1	1	3778
KEGG_SELENOAMINO_ACID_METABOLISM	23	0.641357	0.937778	1	1	2241
REACTOME_SNRNP_ASSEMBLY	54	0.640336	0.969095	1	1	4984
REACTOME_DUAL_INCISION_IN_TC_NER	65	0.639665	0.988636	1	1	5306
REACTOME_INTRA_GOLGI_AND_RETROGRADE_GOLGI_TO_ER_TRAFFIC	186	0.638643	1	1	1	4659
REACTOME_LYSOSOME_VESICLE_BIOGENESIS	33	0.637827	0.966063	1	1	2545
REACTOME_P75NTR_SIGNALS_VIA_NF_KB	15	0.63694	0.895299	1	1	5362
PID_AR_PATHWAY	55	0.636702	0.986517	1	1	3515
REACTOME_PROCESSIVE_SYNTHESIS_ON_THE_LAGGING_STRAND	15	0.635824	0.929336	1	1	3214
WP_PREGNANE_X_RECEPTOR_PATHWAY	15	0.635213	0.917031	1	1	2362
REACTOME_SIGNALING_BY_NOTCH1_PEST_DOMAIN_MUTANTS_IN_CANCER	55	0.634986	0.975824	1	1	3527
WP_IL5_SIGNALING_PATHWAY	36	0.634936	0.963362	1	1	1622
BIOCARTA_PDGF_PATHWAY	27	0.633529	0.940329	1	1	2504
BIOCARTA_VIP_PATHWAY	23	0.633427	0.937229	1	1	3134
KEGG_GNRH_SIGNALING_PATHWAY	73	0.633182	0.991031	1	1	1362
WP_INTERFERON_TYPE_I_SIGNALING_PATHWAYS	53	0.632753	0.979499	1	1	3086
KEGG_PYRIMIDINE_METABOLISM	88	0.631842	0.997561	1	1	2928
REACTOME_APOPTOTIC_FACTOR_MEDIATED_RESPONSE	20	0.631455	0.947608	1	1	2602
REACTOME_TRANSCRIPTIONAL_ACTIVITY_OF_SMAD2_SMAD3_SMAD4_HETEROTRIMER	43	0.629173	0.97235	1	1	3527
KEGG_O_GLYCAN_BIOSYNTHESIS	18	0.627643	0.938998	1	1	1935
REACTOME_AQUAPORIN_MEDIATED_TRANSPORT	30	0.625793	0.952278	1	1	3720
REACTOME_RECOGNITION_OF_DNA_DAMAGE_BY_PCNA_CONTAINING_REPLICATION_COMPLEX	30	0.625078	0.964045	1	1	5111
REACTOME_INITIATION_OF_NUCLEAR_ENVELOPE_NE_REFORMATION	19	0.624336	0.921053	1	1	5004
REACTOME_DISEASES_OF_MITOTIC_CELL_CYCLE	38	0.623596	0.963387	1	1	4078
REACTOME_MRNA_CAPPING	29	0.623148	0.954071	1	1	5496
REACTOME_NEF_MEDIATES_DOWN_MODULATION_OF_CELL_SURFACE_RECEPTORS_BY_RECRUITING_THEM_TO_CLATHRIN_ADAPTERS	20	0.623064	0.945887	1	1	4950
REACTOME_KINESINS	46	0.62214	0.983051	1	1	4402
REACTOME_DAP12_SIGNALING	23	0.62157	0.944915	1	1	3262
WP_FAS_LIGAND_FASL_PATHWAY_AND_STRESS_INDUCTION_OF_HEAT_SHOCK_PROTEINS_HSP_REGULATION	41	0.621231	0.970772	1	1	3434
WP_HIPPOYAP_SIGNALING_PATHWAY	23	0.620489	0.957537	1	1	106
REACTOME_INTERLEUKIN_3_INTERLEUKIN_5_AND_GM_CSF_SIGNALING	40	0.62014	0.983264	1	1	3772
REACTOME_DEGRADATION_OF_BETA_CATENIN_BY_THE_DESTRUCTION_COMPLEX	83	0.618938	0.995434	1	1	5118
WP_ARYL_HYDROCARBON_RECEPTOR_NETPATH	40	0.617524	0.98	1	1	4394
KEGG_DORSO_VENTRAL_AXIS_FORMATION	19	0.617346	0.925532	1	1	1166
REACTOME_INTERLEUKIN_7_SIGNALING	20	0.617091	0.952174	1	1	2504
PID_PI3KCI_AKT_PATHWAY	33	0.616891	0.974478	1	1	3309
WP_MESODERMAL_COMMITMENT_PATHWAY	122	0.616622	1	1	1	4023
WP_AMYOTROPHIC_LATERAL_SCLEROSIS_ALS	32	0.614504	0.977169	1	1	2669
REACTOME_RNA_POLYMERASE_II_TRANSCRIPTION_TERMINATION	65	0.613384	0.993072	1	1	5214
REACTOME_DOWNSTREAM_SIGNAL_TRANSDUCTION	25	0.611595	0.955603	1	1	3381
WP_RANKLRANK_RECEPTOR_ACTIVATOR_OF_NFKB_LIGAND_SIGNALING_PATHWAY	51	0.607474	0.984234	1	1	1592
REACTOME_CONVERSION_FROM_APC_C_CDC20_TO_APC_C_CDH1_IN_LATE_ANAPHASE	20	0.60654	0.93464	1	1	4060
REACTOME_TRANSLATION_OF_SARS_COV_2_STRUCTURAL_PROTEINS	44	0.606534	0.983437	1	1	3527
REACTOME_HIV_INFECTION	223	0.606442	1	1	1	5496
REACTOME_PRE_NOTCH_PROCESSING_IN_GOLGI	18	0.605392	0.948875	1	1	283
REACTOME_SMAD2_SMAD3_SMAD4_HETEROTRIMER_REGULATES_TRANSCRIPTION	31	0.603682	0.972222	1	1	3527
WP_JOUBERT_SYNDROME	70	0.602872	0.995475	1	1	3145
WP_DNA_IRDAMAGE_AND_CELLULAR_RESPONSE_VIA_ATR	79	0.599036	0.997712	1	1	5128
REACTOME_RHO_GTPASES_ACTIVATE_FORMINS	129	0.598779	0.997481	1	1	4698
REACTOME_MATURATION_OF_SARS_COV_2_SPIKE_PROTEIN	29	0.59841	0.963801	1	1	11635
PID_RB_1PATHWAY	59	0.596774	0.993348	1	1	1954
REACTOME_RHOV_GTPASE_CYCLE	31	0.593977	0.962555	1	1	3945
REACTOME_RAS_PROCESSING	22	0.588356	0.950704	1	1	3811
BIOCARTA_GH_PATHWAY	24	0.585442	0.977679	1	1	2400
WP_RETINOBLASTOMA_GENE_IN_CANCER	87	0.584615	1	1	1	4182
REACTOME_IRE1ALPHA_ACTIVATES_CHAPERONES	50	0.583967	0.993151	1	1	1878
REACTOME_TRNA_MODIFICATION_IN_THE_NUCLEUS_AND_CYTOSOL	43	0.58344	0.978402	1	1	4807
REACTOME_NR1H3_NR1H2_REGULATE_GENE_EXPRESSION_LINKED_TO_CHOLESTEROL_TRANSPORT_AND_EFFLUX	31	0.581671	0.970402	1	1	1459
PID_VEGFR1_2_PATHWAY	65	0.580622	0.997763	1	1	617
REACTOME_APOPTOSIS	163	0.578189	1	1	1	4762
REACTOME_FORMATION_OF_INCISION_COMPLEX_IN_GG_NER	43	0.57767	0.995624	1	1	5111
WP_G1_TO_S_CELL_CYCLE_CONTROL	62	0.576665	0.990385	1	1	3384
REACTOME_PIWI_INTERACTING_RNA_PIRNA_BIOGENESIS	18	0.576045	0.971983	1	1	2972
REACTOME_NUCLEAR_ENVELOPE_BREAKDOWN	53	0.575013	0.997727	1	1	4094
REACTOME_FORMATION_OF_TC_NER_PRE_INCISION_COMPLEX	53	0.571454	0.988713	1	1	5608
PID_MYC_REPRESS_PATHWAY	56	0.571294	0.995272	1	1	3744
BIOCARTA_HCMV_PATHWAY	17	0.571073	0.964059	1	1	3086
WP_GLYCOSYLATION_AND_RELATED_CONGENITAL_DEFECTS	25	0.57031	0.973154	1	1	933
REACTOME_FOXO_MEDIATED_TRANSCRIPTION_OF_CELL_CYCLE_GENES	16	0.56844	0.956616	1	1	3444
WP_ENVELOPE_PROTEINS_AND_THEIR_POTENTIAL_ROLES_IN_EDMD_PHYSIOPATHOLOGY	41	0.564071	0.984783	1	1	3919
PID_PS1_PATHWAY	41	0.560226	0.98829	1	1	1853
REACTOME_MISMATCH_REPAIR	15	0.558975	0.953878	1	1	680
REACTOME_SIGNALING_BY_EGFR	47	0.558493	1	1	1	59
REACTOME_HOMOLOGY_DIRECTED_REPAIR	114	0.557342	1	1	1	4599
REACTOME_RND3_GTPASE_CYCLE	38	0.556106	0.995495	1	1	5179
REACTOME_COPI_DEPENDENT_GOLGI_TO_ER_RETROGRADE_TRAFFIC	85	0.555294	0.997738	1	1	4659
REACTOME_LDL_CLEARANCE	16	0.554313	0.959052	1	1	2545
REACTOME_PINK1_PRKN_MEDIATED_MITOPHAGY	20	0.552935	0.967442	1	1	4381
REACTOME_SARS_COV_INFECTIONS	132	0.551488	1	1	1	4733
WP_NANOPARTICLE_TRIGGERED_AUTOPHAGIC_CELL_DEATH	21	0.551265	0.976242	1	1	4803
REACTOME_MYD88_INDEPENDENT_TLR4_CASCADE	90	0.551233	0.997788	1	1	5452
REACTOME_AURKA_ACTIVATION_BY_TPX2	72	0.551227	0.997727	1	1	5016
REACTOME_G_PROTEIN_MEDIATED_EVENTS	41	0.550249	0.997859	1	1	4502
PID_INSULIN_GLUCOSE_PATHWAY	21	0.549669	0.984816	1	1	1289
REACTOME_TRANSLATION_OF_SARS_COV_1_STRUCTURAL_PROTEINS	28	0.549292	0.978824	1	1	11882
REACTOME_ORGANELLE_BIOGENESIS_AND_MAINTENANCE	274	0.547569	1	1	1	4331
PID_IL3_PATHWAY	23	0.545901	0.985325	1	1	3309
REACTOME_REGULATION_OF_PYRUVATE_DEHYDROGENASE_PDH_COMPLEX	15	0.545512	0.970894	1	1	1818
PID_NFKAPPAB_ATYPICAL_PATHWAY	16	0.544936	0.967742	1	1	3163
WP_NSP1_FROM_SARSCOV2_INHIBITS_TRANSLATION_INITIATION_IN_THE_HOST_CELL	16	0.544433	0.959831	1	1	11495
REACTOME_TRANSCRIPTIONAL_REGULATION_BY_MECP2	49	0.544172	0.989011	1	1	3086
REACTOME_RHOB_GTPASE_CYCLE	66	0.542678	0.99793	1	1	4145
REACTOME_SIGNALING_BY_FGFR_IN_DISEASE	50	0.542298	0.997868	1	1	3381
REACTOME_CYTOPROTECTION_BY_HMOX1	116	0.542107	1	1	1	2419
BIOCARTA_PML_PATHWAY	16	0.541037	0.974304	1	1	3991
REACTOME_DNA_DOUBLE_STRAND_BREAK_REPAIR	141	0.540375	1	1	1	4599
WP_SYNAPTIC_SIGNALING_PATHWAYS_ASSOCIATED_WITH_AUTISM_SPECTRUM_DISORDER	41	0.538479	1	1	1	137
BIOCARTA_EIF_PATHWAY	16	0.537651	0.96888	1	1	11567
REACTOME_BUDDING_AND_MATURATION_OF_HIV_VIRION	27	0.534502	0.993789	1	1	4366
PID_HEDGEHOG_2PATHWAY	17	0.528115	0.975155	1	1	3535
REACTOME_LATE_ENDOSOMAL_MICROAUTOPHAGY	30	0.523454	0.991189	1	1	4366
KEGG_RNA_POLYMERASE	28	0.520212	0.989407	1	1	2801
REACTOME_TAK1_ACTIVATES_NFKB_BY_PHOSPHORYLATION_AND_ACTIVATION_OF_IKKS_COMPLEX	29	0.511173	0.993421	1	1	4743
PID_PI3K_PLC_TRK_PATHWAY	32	0.508359	0.99568	1	1	228
BIOCARTA_GSK3_PATHWAY	18	0.505364	0.986928	1	1	11845
WP_MITOCHONDRIAL_GENE_EXPRESSION	19	0.50114	0.993521	1	1	4399
WP_NUCLEOTIDE_EXCISION_REPAIR	44	0.501118	0.995465	1	1	5111
KEGG_NUCLEOTIDE_EXCISION_REPAIR	43	0.499843	0.997797	1	1	5111
PID_AR_TF_PATHWAY	46	0.495035	1	1	1	3188
REACTOME_ENDOSOMAL_SORTING_COMPLEX_REQUIRED_FOR_TRANSPORT_ESCRT	30	0.494912	0.995392	1	1	4608
REACTOME_ABERRANT_REGULATION_OF_MITOTIC_G1_S_TRANSITION_IN_CANCER_DUE_TO_RB1_DEFECTS	17	0.494381	0.988506	1	1	472
REACTOME_THE_ROLE_OF_NEF_IN_HIV_1_REPLICATION_AND_DISEASE_PATHOGENESIS	26	0.492129	0.987179	1	1	4950
WP_TRANSLATION_FACTORS	48	0.486603	0.997854	1	1	178
REACTOME_VIRAL_MESSENGER_RNA_SYNTHESIS	44	0.486007	1	1	1	5496
REACTOME_RNA_POLYMERASE_III_TRANSCRIPTION_INITIATION_FROM_TYPE_1_PROMOTER	28	0.485181	0.993492	1	1	12238
REACTOME_SIGNALING_BY_WNT_IN_CANCER	31	0.48469	0.997868	1	1	12259
REACTOME_TP53_REGULATES_TRANSCRIPTION_OF_DNA_REPAIR_GENES	61	0.483671	1	1	1	4600
WP_MRNA_PROCESSING	124	0.481902	1	1	1	12808
REACTOME_RNA_POLYMERASE_II_TRANSCRIBES_SNRNA_GENES	73	0.480279	1	1	1	12627
KEGG_HOMOLOGOUS_RECOMBINATION	27	0.474696	0.997934	1	1	4509
REACTOME_PKMTS_METHYLATE_HISTONE_LYSINES	45	0.473157	1	1	1	5156
REACTOME_SIGNALING_BY_FGFR2_IIIA_TM	19	0.471928	0.993378	1	1	1195
REACTOME_COPI_MEDIATED_ANTEROGRADE_TRANSPORT	90	0.470817	1	1	1	2300
REACTOME_CYCLIN_A_B1_B2_ASSOCIATED_EVENTS_DURING_G2_M_TRANSITION	25	0.469167	0.995876	1	1	3384
WP_HEMATOPOIETIC_STEM_CELL_GENE_REGULATION_BY_GABP_ALPHABETA_COMPLEX	19	0.469035	0.993506	1	1	3788
REACTOME_GAP_FILLING_DNA_REPAIR_SYNTHESIS_AND_LIGATION_IN_GG_NER	25	0.467382	0.995726	1	1	3527
KEGG_MISMATCH_REPAIR	22	0.464098	0.997925	1	1	680
WP_NANOPARTICLEMEDIATED_ACTIVATION_OF_RECEPTOR_SIGNALING	27	0.462624	1	1	1	5350
REACTOME_DEADENYLATION_DEPENDENT_MRNA_DECAY	56	0.459703	1	1	1	4080
REACTOME_TRNA_PROCESSING_IN_THE_NUCLEUS	58	0.458415	1	1	1	4988
REACTOME_TRANSCRIPTION_COUPLED_NUCLEOTIDE_EXCISION_REPAIR_TC_NER	78	0.457965	1	1	1	5306
REACTOME_FANCONI_ANEMIA_PATHWAY	36	0.457298	1	1	1	5083
WP_DNA_REPAIR_PATHWAYS_FULL_NETWORK	119	0.455338	1	1	1	5157
REACTOME_RAF_ACTIVATION	32	0.454301	1	1	1	10912
REACTOME_NRIF_SIGNALS_CELL_DEATH_FROM_THE_NUCLEUS	15	0.448768	0.99389	1	1	5584
REACTOME_RESOLUTION_OF_D_LOOP_STRUCTURES	32	0.44794	0.995781	1	1	4509
REACTOME_RNA_POLYMERASE_III_CHAIN_ELONGATION	18	0.447297	0.989224	1	1	2476
REACTOME_APOPTOTIC_CLEAVAGE_OF_CELLULAR_PROTEINS	33	0.445852	0.997797	1	1	4611
REACTOME_FORMATION_OF_RNA_POL_II_ELONGATION_COMPLEX	57	0.442816	1	1	1	12670
REACTOME_RNA_POLYMERASE_I_TRANSCRIPTION_INITIATION	47	0.441528	1	1	1	3828
REACTOME_GOLGI_TO_ER_RETROGRADE_TRANSPORT	118	0.436589	1	1	1	4659
REACTOME_HIV_TRANSCRIPTION_ELONGATION	42	0.429707	1	1	1	12627
REACTOME_NUCLEAR_ENVELOPE_NE_REASSEMBLY	66	0.424801	1	1	1	5004
REACTOME_FORMATION_OF_THE_EARLY_ELONGATION_COMPLEX	33	0.417223	1	1	1	12627
WP_SIMPLIFIED_INTERACTION_MAP_BETWEEN_LOXL4_AND_OXIDATIVE_STRESS_PATHWAY	16	0.411615	1	1	1	1564
BIOCARTA_NDKDYNAMIN_PATHWAY	16	0.40659	1	1	1	2669
REACTOME_JNK_C_JUN_KINASES_PHOSPHORYLATION_AND_ACTIVATION_MEDIATED_BY_ACTIVATED_HUMAN_TAK1	20	0.402004	1	1	1	4475
BIOCARTA_CHEMICAL_PATHWAY	18	0.396256	1	1	1	2332
REACTOME_REGULATION_OF_TP53_ACTIVITY_THROUGH_PHOSPHORYLATION	89	0.368626	1	1	1	4543
REACTOME_APOPTOTIC_EXECUTION_PHASE	43	0.35925	1	1	1	12975
REACTOME_NUCLEOTIDE_EXCISION_REPAIR	110	0.34296	1	1	1	13273
BIOCARTA_CERAMIDE_PATHWAY	21	0.341591	1	1	1	4372
REACTOME_RRNA_MODIFICATION_IN_THE_NUCLEUS_AND_CYTOSOL	60	0.310325	1	0.999996	1	4163
